# Supplementary material for: BRD1 haploinsufficiency alters early neuronal programming and disrupts maturation in human induced glutamatergic neurons
Source: bioRxiv preprint, doi:10.64898/2025.12.19.695380, version 1 (2025-12-19)
Supplement: Supplemental tables [file 695380_file07.xlsx]

## Sheet: Table S1
Table S1 | Sequence information of allele-specific single guide RNAs (crRNAs) and PAMs for targeting of CRISPR SNP sites flanking BRD1 exons 4-7
Design ID	Gene Symbol	Position	Strand	Sequence	PAM	On-Target Score	Off-Target Score	SNP target	Position in BRD1
CD.Cas9.DJVX3690.AZ	44 / rev	46	-	TCTGGAGAGGTGGGGCGGGC	GGG	3	0	rs113219571	22.50.185.376
CD.Cas9.JDXB7310.AA	44 / rev	46	-	AAGGGAGCAGGTGCTATCAA	TGG	64	38	rs138850	22.50.193.337
*Information from open-access web tool CRISPOR.org

## Sheet: Table S2
Table S2 |Primers used for PCR validation of deletion and wild-type allele
ACTIO	NS	QUERY S	CORE ST	ART	END Q	SIZE I	DENTITY	CHROM	STR	AND START	END	SPAN	Sequence
browser	details	primer1_F	20	1	20	20	1	chr22	+	50185187	50185206	20	GAGAACGTTCATGCTGGGTT
browser	details	primer6_R	20	1	20	20	1	chr22	-	50185672	50185691	20	CGTGGCTCCTCATAACACCC
browser	details	primerB_F	20	1	20	20	1	chr22	+	50193186	50193205	20	ACCAGGTGCACAGAAAACCA
browser	details	primerE_R	20	1	20	20	1	chr22	-	50193457	50193476	20	CCTGCGACCATCTGTGTCAT
browser	details	SEQ1_F	20	1	20	20	1	chr22	+	50185312	50185331	20	CATTCCAGTCTGGCACTCGC
browser	details	SEQ2_R	20	1	20	20	1	chr22	-	50185442	50185461	20	AGCAAGTGGCCTGAAAGTCC
browser	details	SEQA_F	20	1	20	20	1	chr22	+	50193296	50193315	20	CGACACACGTTTCCCCACAG
browser	details	SEQB_R	20	1	20	20	1	chr22	-	50193359	50193378	20	TCTGGCGCACTCTTCTGTCC
Flanking site		PCR product length (incl. primers)
CRISPR 1-2 (185-193)		primerE_R	primer6_R
	primer1_F	329	504
	primerB_F	291
CRISPR 1 185		primer6_R
	primer1_F	504
CRISPR 2 193		primerE_R
	primerB_F	291

## Sheet: Table S3
Table S3 | 2-way ANOVA results for cell-state marker expression
gene	p_genotype	p_time	p_interaction	p_interaction_fdr
PODXL	1.74938e-07	6.1632e-29	3.75333e-10	9.75867e-09
TDGF1	7.449e-08	1.1114e-12	2.86341e-10	9.75867e-09
POU5F1	4.93632e-06	2.14893e-15	5.70759e-08	9.89315e-07
PAX6	0.000209671	1.03674e-11	2.00349e-07	2.60454e-06
HMGB2	1.88865e-05	4.51063e-40	4.1411e-06	4.30674e-05
PPP1R17	0.0137783	4.8874e-16	1.89978e-05	0.000164647
ZFP42	0.00023866	4.36539e-24	4.43527e-05	0.000329477
NEUROD1	0.128958	3.14483e-12	0.00385207	0.0222564
SNAP25	0.3986	1.52747e-26	0.00359526	0.0222564
DNMT3B	0.0939315	1.06695e-17	0.0163933	0.0852453
VIM	0.0420268	2.62521e-17	0.0190562	0.0900837
NEFM	0.101798	1.24014e-26	0.0276192	0.119683
SLC1A3	0.0654877	1.11875e-22	0.0349968	0.139987
DPPA4	0.0976285	4.80218e-29	0.0470249	0.173655
SOX2	0.0674499	6.30257e-16	0.0500927	0.173655
MKI67	0.113758	2.14298e-20	0.0802503	0.256149
ANK2	0.0230103	8.60552e-14	0.0837411	0.256149
MAP2	0.000100934	5.40698e-28	0.0904312	0.261246
NCAM1	0.273703	5.93193e-14	0.110964	0.288507
NANOG	0.0997277	6.18879e-06	0.106091	0.288507
SLC17A6	0.266771	2.09985e-30	0.125819	0.309138
NES	0.134715	2.34177e-05	0.130789	0.309138
SSTR2	0.375991	6.43318e-20	0.14506	0.327962
PCNA	0.298583	3.75615e-31	0.21189	0.440731
MAPT	0.917695	1.50465e-12	0.210215	0.440731
BDNF	0.0989784	1.70495e-15	0.22346	0.446921
RBFOX3	0.77178	5.65385e-05	0.244546	0.470977
GLS	0.928093	0.00335034	0.332435	0.61738
NEFH	0.0306296	3.41951e-14	0.344947	0.618525
POU3F2	0.000560384	0.0319619	0.369481	0.619774
KCNC3	0.52445	0.000719725	0.365287	0.619774
CAMK2A	0.323417	0.00019233	0.38541	0.626292
DCX	0.0259066	4.61789e-18	0.405377	0.638777
NOTCH1	0.360613	4.80884e-13	0.451022	0.689798
SLC17A7	0.418075	2.28159e-07	0.496043	0.723648
TUBB3	0.650855	0.00318588	0.550265	0.723648
EOMES	0.659495	0.00108887	0.556653	0.723648
CAMK2B	0.312106	9.8154e-12	0.524362	0.723648
KCNC1	0.655255	1.75381e-06	0.556018	0.723648
SYP	0.586253	1.20618e-06	0.52202	0.723648
DLG4	0.844869	0.00647156	0.593851	0.753177
HES1	0.4776	5.90345e-22	0.614709	0.761068
NEUROG2	0.474312	0.00018571	0.693552	0.819652
KLF4	0.994689	5.84209e-07	0.687075	0.819652
LMO4	0.0707408	7.21893e-26	0.866395	0.97682
LIN28A	0.788034	2.32614e-15	0.882895	0.97682
DBN1	0.857149	0.00467667	0.862612	0.97682
CDH2	2.13828e-07	1.93745e-16	0.922635	0.98188
SALL4	0.771796	4.43492e-29	0.932687	0.98188
CDH1	0.899452	1.09347e-31	0.971163	0.98188
TNC	0.968726	1.15805e-19	0.98188	0.98188
SYN1	0.199177	1.74823e-07	0.97588	0.98188

## Sheet: Table S4
Table S4 | RNAseq DEG analysis of BRD1 and WT iGLUTs across time-points (D7, D21, D28)
	baseMean	log2FoldChange	lfcSE	stat	pvalue	padj
ENSG00000179817	272.445	19.2752	1.452	13.2749	3.23539e-40	9.3273e-36
ENSG00000287046	73.3912	-19.6836	1.94722	-10.1086	5.06164e-24	7.2961e-20
ENSG00000143333	22163.3	1.59319	0.172203	9.25177	2.20799e-20	2.1218e-16
ENSG00000004948	54.2703	-22.8806	2.99859	-7.63044	2.33946e-14	1.6861e-10
ENSG00000227640	33.167	21.6808	2.89782	7.48177	7.33267e-14	4.22787e-10
ENSG00000182795	34.1352	17.6153	2.41832	7.28412	3.23781e-13	1.55571e-09
ENSG00000250329	5.6921	-30	4.1662	-7.20081	5.98544e-13	2.28225e-09
ENSG00000170542	8589.53	1.06079	0.147473	7.19311	6.33322e-13	2.28225e-09
ENSG00000287318	25.7578	-19.2423	2.71197	-7.09531	1.29058e-12	3.72061e-09
ENSG00000106853	4005.62	0.936937	0.131943	7.10107	1.23795e-12	3.72061e-09
ENSG00000114698	38.9215	-20.106	2.87247	-6.99956	2.56769e-12	6.72945e-09
ENSG00000183423	34.6619	19.9524	2.86025	6.97577	3.04199e-12	7.30813e-09
ENSG00000120306	7131.31	0.664283	0.0958348	6.93154	4.16289e-12	9.23169e-09
ENSG00000183696	3871.11	1.27072	0.192245	6.6099	3.84589e-11	7.9195e-08
ENSG00000187166	7.56708	-30	4.58342	-6.54534	5.93617e-11	1.14089e-07
ENSG00000234741	12009.3	0.908444	0.139351	6.51912	7.07232e-11	1.2743e-07
ENSG00000075290	6.3334	-30	4.63525	-6.47214	9.66235e-11	1.63856e-07
ENSG00000159251	6216.02	3.16996	0.495245	6.40078	1.54585e-10	2.47585e-07
ENSG00000073756	753.123	19.9455	3.12944	6.37352	1.84739e-10	2.66292e-07
ENSG00000276850	320.406	5.81007	0.910578	6.38064	1.76352e-10	2.66292e-07
ENSG00000089157	78917.7	0.434265	0.0684501	6.34425	2.23509e-10	3.06835e-07
ENSG00000106211	5042.49	0.82421	0.130588	6.31152	2.76301e-10	3.62067e-07
ENSG00000067715	34366.5	-0.61344	0.0987243	-6.21367	5.17625e-10	6.48809e-07
ENSG00000166828	13.0327	-21.2617	3.50643	-6.06364	1.33079e-09	1.59855e-06
ENSG00000137033	6.5514	-29.8448	4.93907	-6.0426	1.51655e-09	1.74882e-06
ENSG00000235162	1187.26	1.24509	0.207042	6.01373	1.81305e-09	2.01032e-06
ENSG00000078018	53791.9	-0.540926	0.0910867	-5.93858	2.87495e-09	3.06971e-06
ENSG00000115365	17912.9	-0.678365	0.119981	-5.65395	1.56806e-08	1.55881e-05
ENSG00000163666	750.618	-2.14283	0.378663	-5.65893	1.5232e-08	1.55881e-05
ENSG00000079459	58348	0.502279	0.0897917	5.59383	2.22113e-08	2.06558e-05
ENSG00000183036	3538.29	-0.992705	0.177423	-5.59512	2.20464e-08	2.06558e-05
ENSG00000167996	136872	0.728381	0.131951	5.52009	3.38833e-08	3.05257e-05
ENSG00000285929	6.59348	-22.8654	4.15963	-5.49698	3.86358e-08	3.37525e-05
ENSG00000176485	6045.51	0.766916	0.142048	5.39901	6.70094e-08	5.6818e-05
ENSG00000259129	230.479	-2.65223	0.495373	-5.354	8.60301e-08	7.08618e-05
ENSG00000144227	1947.71	-1.20384	0.227326	-5.29564	1.18601e-07	8.54789e-05
ENSG00000287527	19.495	16.9071	3.19008	5.29989	1.15871e-07	8.54789e-05
ENSG00000106341	10104.8	-0.925308	0.174381	-5.30624	1.11913e-07	8.54789e-05
ENSG00000104490	15968.2	-0.7521	0.14184	-5.30244	1.14266e-07	8.54789e-05
ENSG00000018236	60000.2	-0.615434	0.116088	-5.30143	1.149e-07	8.54789e-05
ENSG00000151632	3132.52	-0.936434	0.178263	-5.25312	1.49545e-07	0.000100261
ENSG00000057294	15386.5	1.64668	0.312997	5.261	1.43274e-07	0.000100261
ENSG00000185650	11064.2	3.95142	0.751607	5.25729	1.46193e-07	0.000100261
ENSG00000171530	10307.6	0.556169	0.106284	5.23287	1.66902e-07	0.000109355
ENSG00000288041	352.164	2.3695	0.459068	5.16155	2.4491e-07	0.0001569
ENSG00000178301	1637.2	1.22434	0.237447	5.15629	2.51884e-07	0.00015786
ENSG00000237772	6.8977	22.7124	4.41275	5.147	2.64683e-07	0.000162352
ENSG00000198242	11944.6	0.561634	0.109499	5.12911	2.91117e-07	0.000174846
ENSG00000117318	31191.1	-0.665411	0.130003	-5.11844	3.08081e-07	0.000176264
ENSG00000058091	2839.53	-1.07221	0.209498	-5.11798	3.08826e-07	0.000176264
ENSG00000120645	45.5106	-7.09871	1.38751	-5.11616	3.1182e-07	0.000176264
ENSG00000183662	259.426	-7.18393	1.40854	-5.10028	3.39147e-07	0.000184477
ENSG00000124785	15176.7	-0.590056	0.115664	-5.10149	3.36994e-07	0.000184477
ENSG00000250422	173.486	-6.81528	1.3372	-5.09668	3.45663e-07	0.000184539
ENSG00000226862	27.4849	-5.2639	1.03549	-5.08349	3.70568e-07	0.000194238
ENSG00000275160	74.4336	-3.58424	0.710517	-5.04456	4.54572e-07	0.000234015
ENSG00000234975	230.801	0.8309	0.165616	5.01702	5.24781e-07	0.000264287
ENSG00000091664	51947.1	-0.674987	0.134607	-5.0145	5.31709e-07	0.000264287
ENSG00000111012	14.7812	-20.4487	4.08281	-5.00849	5.48594e-07	0.000268058
ENSG00000178562	13.721	-30	6.00263	-4.99781	5.79841e-07	0.000273793
ENSG00000288818	149.058	-1.70435	0.341172	-4.99558	5.86592e-07	0.000273793
ENSG00000166741	110.836	5.42574	1.08627	4.99485	5.88822e-07	0.000273793
ENSG00000137210	6216.19	-0.527282	0.105837	-4.98201	6.29277e-07	0.000287959
ENSG00000232597	9.46818	-22.6994	4.5603	-4.9776	6.43783e-07	0.000289994
ENSG00000104549	33653.9	0.658497	0.132585	4.96659	6.81401e-07	0.000302217
ENSG00000111913	3065.77	1.44764	0.2918	4.96108	7.01021e-07	0.000306208
ENSG00000139970	73796.6	-0.354093	0.0714563	-4.95537	7.21927e-07	0.000310633
ENSG00000102172	35627.5	0.279204	0.0564552	4.94559	7.59151e-07	0.000320932
ENSG00000254768	4377.82	-0.748927	0.151504	-4.9433	7.68125e-07	0.000320932
ENSG00000153774	6639.9	0.732506	0.149427	4.9021	9.48167e-07	0.000390496
ENSG00000246273	1094.66	1.5187	0.311318	4.8783	1.07006e-06	0.000434488
ENSG00000187546	51.6397	6.9312	1.42215	4.87374	1.09505e-06	0.000438463
ENSG00000229847	35.2979	-7.5788	1.56212	-4.85162	1.22455e-06	0.000483595
ENSG00000237994	60.4287	-5.83921	1.20506	-4.84559	1.26239e-06	0.000491802
ENSG00000279791	62.3768	-4.87698	1.01265	-4.81608	1.46408e-06	0.000562774
ENSG00000107105	34790.8	-0.611448	0.12703	-4.81341	1.4838e-06	0.000562849
ENSG00000286524	4.23654	23.7844	4.97598	4.77985	1.75425e-06	0.000656794
ENSG00000267452	133.7	6.73196	1.41181	4.76832	1.85764e-06	0.00068659
ENSG00000105640	53812.1	0.382196	0.0810109	4.71784	2.38363e-06	0.000869843
ENSG00000153253	13927.9	-0.924782	0.196353	-4.70979	2.47977e-06	0.000893617
ENSG00000129422	2015.86	1.12486	0.239482	4.69705	2.6394e-06	0.000939398
ENSG00000187048	123.323	-5.64993	1.20783	-4.67775	2.90045e-06	0.00101972
ENSG00000081818	124.727	-3.15872	0.676329	-4.67039	3.00633e-06	0.00104421
ENSG00000148677	4201.88	5.73959	1.23043	4.66469	3.09075e-06	0.00106075
ENSG00000180573	4666.98	1.19807	0.257037	4.6611	3.14528e-06	0.00106644
ENSG00000197958	14654.6	0.518455	0.111286	4.65875	3.18131e-06	0.00106644
ENSG00000283405	7.51967	21.7483	4.67571	4.65134	3.29785e-06	0.0010928
ENSG00000198431	15685.8	-0.432078	0.0930581	-4.64309	3.43232e-06	0.00112444
ENSG00000287089	41.5358	-5.94797	1.28285	-4.63654	3.54284e-06	0.0011476
ENSG00000067082	18591.4	0.622092	0.134381	4.62931	3.6688e-06	0.0011752
ENSG00000007350	9.33616	-20.59	4.45889	-4.61773	3.87964e-06	0.00122908
ENSG00000142871	7745	8.51865	1.847	4.61216	3.98505e-06	0.00124875
ENSG00000122512	1617.32	-0.995948	0.216481	-4.60062	4.21228e-06	0.00129187
ENSG00000233821	83.3644	-6.6657	1.44866	-4.60128	4.19902e-06	0.00129187
ENSG00000165181	47.7589	5.72996	1.25014	4.58345	4.57365e-06	0.00138793
ENSG00000169760	2488.52	-1.16714	0.25503	-4.57649	4.72853e-06	0.00141999
ENSG00000169282	3593.53	-1.09922	0.240638	-4.56792	4.9259e-06	0.00146401
ENSG00000145681	20615.8	1.56589	0.344782	4.54167	5.58105e-06	0.0016418
ENSG00000267353	4.91775	22.5632	4.9728	4.53732	5.69743e-06	0.0016591
ENSG00000075785	31393.6	0.321986	0.0712076	4.5218	6.13156e-06	0.00176767
ENSG00000275846	4.68058	23.3028	5.15595	4.5196	6.19555e-06	0.00176843
ENSG00000284753	433.459	0.851473	0.188568	4.51546	6.31795e-06	0.00178569
ENSG00000238103	768.983	0.627435	0.139111	4.51033	6.47281e-06	0.0018117
ENSG00000266385	13.8917	5.79347	1.2885	4.49629	6.91482e-06	0.0019168
ENSG00000286282	9.43531	-19.4369	4.33402	-4.48472	7.30091e-06	0.00200455
ENSG00000127364	21.7941	8.66799	1.93621	4.47679	7.5775e-06	0.00206087
ENSG00000214212	34.5901	-9.17872	2.05345	-4.4699	7.82569e-06	0.00210848
ENSG00000213553	488.609	0.614048	0.138109	4.44612	8.74346e-06	0.00233394
ENSG00000228108	16.0191	5.61925	1.26719	4.43443	9.23164e-06	0.00244002
ENSG00000244040	19.8397	8.52779	1.92388	4.4326	9.31015e-06	0.00244002
ENSG00000165757	525.688	-4.48681	1.015	-4.4205	9.84728e-06	0.00255754
ENSG00000172159	9578.74	-0.516879	0.117025	-4.41682	1.00162e-05	0.00257818
ENSG00000177551	3294.84	-1.09489	0.248169	-4.41188	1.02477e-05	0.00261443
ENSG00000198673	3087.54	-0.996598	0.226094	-4.40789	1.0438e-05	0.00263963
ENSG00000118785	17543.8	1.46022	0.331431	4.40582	1.05384e-05	0.00264184
ENSG00000178150	1639.62	1.10417	0.25105	4.39821	1.09145e-05	0.00271254
ENSG00000186469	31664.2	-0.47708	0.10863	-4.39179	1.12421e-05	0.00277007
ENSG00000166510	5.04237	30	6.83664	4.38812	1.14335e-05	0.00279336
ENSG00000172348	26877.9	-0.687174	0.156695	-4.38541	1.15768e-05	0.0028046
ENSG00000260360	17.2389	7.66358	1.75443	4.36813	1.25314e-05	0.00301056
ENSG00000164330	20718	-0.705736	0.161842	-4.36064	1.2968e-05	0.00308971
ENSG00000169189	5441.02	0.51502	0.118489	4.34657	1.38282e-05	0.00326765
ENSG00000253573	18.9606	-3.7116	0.856806	-4.33189	1.47832e-05	0.00346491
ENSG00000094755	1514.18	1.97262	0.456327	4.32283	1.54039e-05	0.00358128
ENSG00000282390	7.98894	-19.1381	4.4337	-4.3165	1.58521e-05	0.003656
ENSG00000197279	1249.34	1.75737	0.410133	4.28488	1.82839e-05	0.00415044
ENSG00000155093	7965.15	-1.06022	0.24736	-4.28614	1.81805e-05	0.00415044
ENSG00000249993	56.3429	2.99964	0.701219	4.27774	1.88798e-05	0.00425224
ENSG00000254319	8.10397	19.7503	4.62574	4.26966	1.9577e-05	0.00437508
ENSG00000260095	17.2622	6.48897	1.52226	4.26272	2.0195e-05	0.00447848
ENSG00000267632	25.7479	6.2825	1.47587	4.25682	2.07356e-05	0.00456325
ENSG00000286427	43.0672	-6.47206	1.5217	-4.25316	2.10773e-05	0.00460331
ENSG00000261033	38.9788	5.91828	1.39417	4.24503	2.18564e-05	0.00470223
ENSG00000142541	39766.8	0.415831	0.0979453	4.24554	2.18065e-05	0.00470223
ENSG00000163827	31.5661	8.88597	2.09503	4.24145	2.22077e-05	0.00474241
ENSG00000290781	3.96485	-30	7.0812	-4.23657	2.26962e-05	0.0048111
ENSG00000182551	7750.79	-0.684978	0.161805	-4.23335	2.30233e-05	0.00481961
ENSG00000280623	3048.83	1.4806	0.349785	4.23289	2.30707e-05	0.00481961
ENSG00000224294	830.481	2.64899	0.626487	4.22833	2.35432e-05	0.00488292
ENSG00000256223	2255.58	-0.869957	0.206193	-4.21914	2.45233e-05	0.00504988
ENSG00000286343	7.57011	-7.92719	1.88013	-4.21629	2.48352e-05	0.00507783
ENSG00000175061	8820.21	0.447465	0.106307	4.20918	2.56295e-05	0.00520334
ENSG00000136231	7969.65	0.588946	0.140544	4.19046	2.78384e-05	0.00557329
ENSG00000007171	141.124	6.57234	1.56827	4.19082	2.77952e-05	0.00557329
ENSG00000160791	6.68388	-30	7.16801	-4.18526	2.84838e-05	0.00566317
ENSG00000185532	5858.18	-0.777951	0.186108	-4.18009	2.91387e-05	0.0057537
ENSG00000254682	827.761	1.05288	0.25223	4.17427	2.98943e-05	0.0058261
ENSG00000203546	49.3162	1.88124	0.450687	4.17415	2.99096e-05	0.0058261
ENSG00000174444	64746.3	0.371636	0.0890784	4.17202	3.01917e-05	0.00584159
ENSG00000279565	47.1532	-6.0379	1.45435	-4.15161	3.30139e-05	0.00634505
ENSG00000198625	2156.94	0.680122	0.164091	4.14477	3.40149e-05	0.00645141
ENSG00000178217	8.32032	20.5265	4.95234	4.1448	3.40116e-05	0.00645141
ENSG00000179520	10.8493	-16.7216	4.04319	-4.13574	3.53814e-05	0.00666673
ENSG00000143476	4508.34	6.75867	1.63495	4.13387	3.5671e-05	0.00667766
ENSG00000258754	82.4653	-4.42291	1.07056	-4.13141	3.60552e-05	0.00670603
ENSG00000145721	2924.01	-1.64331	0.398043	-4.12848	3.65164e-05	0.00674828
ENSG00000184408	285.259	-2.74235	0.665333	-4.12177	3.75978e-05	0.00690387
ENSG00000162869	4820.9	-0.627605	0.152543	-4.11427	3.88402e-05	0.00708686
ENSG00000169855	6762.09	-0.516865	0.125705	-4.11174	3.92688e-05	0.00712
ENSG00000187634	113.833	-1.46939	0.357518	-4.10997	3.95717e-05	0.00713008
ENSG00000260019	5.70694	-17.9549	4.37388	-4.10503	4.04255e-05	0.00723868
ENSG00000237989	15.961	16.9264	4.13299	4.09543	4.21388e-05	0.00749889
ENSG00000119283	352.096	2.15897	0.531835	4.05948	4.91831e-05	0.00869876
ENSG00000083123	4339.32	-0.588424	0.145053	-4.05661	4.97905e-05	0.0087525
ENSG00000166750	5087.34	-0.513081	0.126587	-4.0532	5.05227e-05	0.00882739
ENSG00000101197	10.1786	12.5707	3.1098	4.04228	5.29329e-05	0.00919279
ENSG00000108960	7431.63	-0.847928	0.2099	-4.03969	5.3523e-05	0.0092396
ENSG00000134986	5997.06	-0.433991	0.107512	-4.03666	5.42184e-05	0.00930394
ENSG00000162377	3163.48	0.528061	0.131243	4.02355	5.73284e-05	0.00977941
ENSG00000197747	13743.1	0.430415	0.107136	4.01747	5.88252e-05	0.00997572
ENSG00000107651	5142.05	-0.673738	0.16792	-4.01226	6.01402e-05	0.0101391
ENSG00000123131	29099.6	0.497626	0.124405	4.00004	6.33313e-05	0.010615
ENSG00000165475	847.291	1.07228	0.268435	3.99454	6.48188e-05	0.0108015
ENSG00000147526	6959.98	1.03329	0.258998	3.98958	6.61898e-05	0.0109666
ENSG00000031698	51239.5	0.253276	0.0635386	3.98618	6.71461e-05	0.0110614
ENSG00000165030	449.488	1.78895	0.450007	3.97538	7.02673e-05	0.0115099
ENSG00000130052	16.7863	6.30234	1.58594	3.97387	7.07131e-05	0.0115174
ENSG00000288597	43.2263	3.04823	0.767928	3.96942	7.2047e-05	0.0116446
ENSG00000258096	4.77068	-7.18932	1.81156	-3.96858	7.23016e-05	0.0116446
ENSG00000220581	33.7266	-5.96353	1.50655	-3.9584	7.54523e-05	0.0120845
ENSG00000124786	2933.51	-0.664475	0.167924	-3.95699	7.58986e-05	0.0120889
ENSG00000248918	19.6614	-4.94618	1.25162	-3.95182	7.75603e-05	0.0122185
ENSG00000102218	11918.3	0.774276	0.19592	3.95199	7.75039e-05	0.0122185
ENSG00000074706	635.304	0.987332	0.249925	3.95051	7.79851e-05	0.0122187
ENSG00000268388	10.6152	-17.7276	4.49369	-3.945	7.98015e-05	0.0124357
ENSG00000286330	17.6888	-16.1604	4.11006	-3.93192	8.42704e-05	0.0130615
ENSG00000105825	167.491	6.26831	1.59614	3.92716	8.59542e-05	0.0132512
ENSG00000115414	9026.25	1.11646	0.284759	3.92071	8.82896e-05	0.0133963
ENSG00000259296	16.082	-5.34284	1.36224	-3.9221	8.7782e-05	0.0133963
ENSG00000280189	50.2942	6.67301	1.70181	3.92113	8.81338e-05	0.0133963
ENSG00000135486	50469	0.254113	0.0648971	3.91564	9.01652e-05	0.0136093
ENSG00000159023	3362.02	-0.609139	0.155652	-3.91348	9.09766e-05	0.0136602
ENSG00000012963	4850.76	-0.616102	0.157717	-3.90636	9.36951e-05	0.0139955
ENSG00000287439	96.0873	-5.48835	1.406	-3.90351	9.4807e-05	0.0140886
ENSG00000262576	10.289	-18.628	4.77766	-3.89899	9.65954e-05	0.0142808
ENSG00000113552	9552.21	0.48271	0.123946	3.89451	9.83992e-05	0.0144354
ENSG00000178172	115.275	4.33777	1.114	3.89386	9.86629e-05	0.0144354
ENSG00000287209	131.416	4.52399	1.16218	3.89268	9.91436e-05	0.0144354
ENSG00000185518	1608.11	-2.30129	0.591534	-3.89038	0.000100088	0.0144997
ENSG00000154864	2173.47	-1.26034	0.324162	-3.888	0.000101075	0.0145695
ENSG00000235823	2834.38	0.91817	0.236312	3.88542	0.000102153	0.0146515
ENSG00000185585	232.806	-5.976	1.54	-3.88052	0.000104234	0.014876
ENSG00000211455	5628.79	-0.629086	0.162276	-3.87665	0.000105905	0.0150401
ENSG00000108298	32372.6	0.348361	0.0900546	3.86833	0.000109583	0.0154861
ENSG00000180318	856.455	1.02335	0.264642	3.86691	0.000110221	0.0155003
ENSG00000156976	97812.8	0.421405	0.109138	3.86122	0.000112823	0.0156373
ENSG00000224786	401.682	-1.48728	0.38504	-3.86267	0.000112155	0.0156373
ENSG00000173612	39.8531	-6.03051	1.56161	-3.86173	0.000112585	0.0156373
ENSG00000268471	1380.45	-0.879072	0.228027	-3.85512	0.000115672	0.0159556
ENSG00000145425	26468	0.442884	0.115382	3.83842	0.000123827	0.016999
ENSG00000204128	146.865	2.01461	0.526059	3.82964	0.000128332	0.0173907
ENSG00000150093	23003.7	-0.431571	0.112699	-3.82942	0.000128444	0.0173907
ENSG00000108691	1320.13	1.07333	0.280292	3.82934	0.000128489	0.0173907
ENSG00000066926	3492.85	-0.602409	0.157412	-3.82697	0.000129732	0.0174769
ENSG00000225616	358.087	0.717188	0.187907	3.81671	0.000135243	0.0181345
ENSG00000152104	3175.47	3.26868	0.856899	3.81455	0.000136432	0.0181371
ENSG00000196071	133.629	-5.18394	1.3594	-3.81341	0.000137061	0.0181371
ENSG00000272515	45.5201	-6.50023	1.70464	-3.81325	0.00013715	0.0181371
ENSG00000249514	6.35681	-7.01405	1.84136	-3.80918	0.000139431	0.0182712
ENSG00000140382	5807.59	-0.634475	0.166525	-3.81009	0.000138918	0.0182712
ENSG00000176046	194.301	4.94821	1.29981	3.80687	0.000140739	0.0183591
ENSG00000188981	47.9327	4.82026	1.26729	3.80359	0.000142615	0.018437
ENSG00000188487	72.008	-5.60525	1.47363	-3.8037	0.000142549	0.018437
ENSG00000131558	6627.02	-0.648884	0.170686	-3.80162	0.000143756	0.0185015
ENSG00000260000	924.553	-0.962866	0.25358	-3.79708	0.000146408	0.0185939
ENSG00000148834	15588.2	0.435542	0.11469	3.79754	0.000146137	0.0185939
ENSG00000103769	32684.7	0.261255	0.0687671	3.79912	0.000145211	0.0185939
ENSG00000196553	11.2316	-6.05602	1.59568	-3.79526	0.000147488	0.0186488
ENSG00000145741	19848.3	0.328712	0.086715	3.79072	0.000150212	0.0188281
ENSG00000152229	2599.62	1.04609	0.275955	3.7908	0.000150164	0.0188281
ENSG00000003096	5441.26	-0.726247	0.191796	-3.78657	0.000152743	0.0189912
ENSG00000260797	45.2121	5.57975	1.47362	3.78642	0.000152831	0.0189912
ENSG00000281912	21.1268	-7.99022	2.11327	-3.78098	0.000156214	0.0193283
ENSG00000288012	29.7448	-1.98728	0.526458	-3.77481	0.000160132	0.0197284
ENSG00000080644	1506.66	-1.54315	0.409447	-3.76887	0.000163986	0.0201173
ENSG00000177410	1834.44	0.582449	0.154586	3.76779	0.000164699	0.0201191
ENSG00000185513	224.769	1.59118	0.422726	3.7641	0.000167153	0.0203327
ENSG00000137869	712.671	3.06998	0.816255	3.76106	0.000169196	0.0204947
ENSG00000149273	66489.2	0.416754	0.110944	3.75644	0.000172351	0.0207895
ENSG00000186310	34102.9	-0.362213	0.0966804	-3.7465	0.000179321	0.0215402
ENSG00000145192	37.3505	-6.82472	1.82846	-3.7325	0.000189587	0.0226789
ENSG00000180616	2773.33	-0.82334	0.220905	-3.72712	0.000193683	0.0229781
ENSG00000142534	25935.9	0.567678	0.152269	3.72813	0.000192903	0.0229781
ENSG00000122406	40274.8	0.319779	0.0858968	3.72282	0.000197007	0.0232767
ENSG00000106631	811.071	-5.62074	1.51144	-3.71881	0.000200166	0.0234864
ENSG00000186628	22.7536	5.76956	1.55158	3.7185	0.000200411	0.0234864
ENSG00000166260	6031.4	-0.39808	0.107128	-3.71594	0.000202448	0.0236291
ENSG00000291111	178.723	2.00561	0.539885	3.71488	0.000203304	0.0236332
ENSG00000197329	10389.5	-0.487002	0.131305	-3.70892	0.000208142	0.0239225
ENSG00000280739	398.701	-2.4501	0.660479	-3.70958	0.000207607	0.0239225
ENSG00000132975	89.0477	-5.55667	1.49826	-3.70875	0.000208282	0.0239225
ENSG00000100351	14.0873	-9.6335	2.59958	-3.70579	0.000210735	0.0241083
ENSG00000262294	21.9792	-5.87212	1.58532	-3.70406	0.000212174	0.0241769
ENSG00000260392	11.9458	7.94799	2.14668	3.70246	0.000213516	0.0242341
ENSG00000157219	89.1107	-5.64233	1.52565	-3.69832	0.000217034	0.0245368
ENSG00000198075	2084.76	-0.797484	0.215861	-3.69443	0.000220379	0.0248176
ENSG00000122026	36850.6	0.383517	0.103887	3.69169	0.000222772	0.0249894
ENSG00000120279	590.227	3.04268	0.825031	3.68796	0.000226059	0.0251624
ENSG00000265752	53.3077	-5.18109	1.40452	-3.68887	0.000225249	0.0251624
ENSG00000134262	1525.36	-0.700734	0.190193	-3.68433	0.000229307	0.0254258
ENSG00000257271	32.5508	-5.11296	1.39044	-3.67723	0.00023578	0.0260433
ENSG00000157005	8824.16	-0.756373	0.205965	-3.67235	0.000240332	0.026246
ENSG00000138738	543.228	-1.47245	0.400959	-3.67233	0.000240346	0.026246
ENSG00000107745	6622.05	0.41453	0.11286	3.67296	0.000239761	0.026246
ENSG00000148730	9331.92	0.477225	0.130049	3.66958	0.00024295	0.0264302
ENSG00000138757	58773.8	-0.33993	0.0927017	-3.66692	0.000245485	0.0265142
ENSG00000244968	293.856	-1.31749	0.359299	-3.66685	0.000245561	0.0265142
ENSG00000171928	6441.46	0.733703	0.200207	3.66473	0.000247601	0.0265654
ENSG00000278891	56.3577	5.64957	1.54173	3.66444	0.000247879	0.0265654
ENSG00000175426	34539.2	-0.804779	0.219789	-3.66159	0.000250653	0.0267633
ENSG00000206828	8.40295	-5.34073	1.45925	-3.65992	0.000252292	0.0268388
ENSG00000224141	95.099	4.48158	1.22567	3.65644	0.000255743	0.0271059
ENSG00000175334	11482.8	0.306236	0.0838035	3.65422	0.000257964	0.0271418
ENSG00000083520	7287.37	-0.702653	0.192281	-3.65429	0.000257891	0.0271418
ENSG00000100479	420.625	1.34878	0.369774	3.64759	0.000264715	0.0277013
ENSG00000153339	1552.58	1.03105	0.282703	3.64711	0.000265204	0.0277013
ENSG00000231500	54147.3	0.477913	0.131165	3.64361	0.000268836	0.0279794
ENSG00000228592	3340.21	-0.773209	0.212472	-3.63911	0.00027358	0.0283707
ENSG00000167641	2795.93	0.604284	0.166305	3.63359	0.000279503	0.028881
ENSG00000121552	56.1882	5.96308	1.64174	3.63217	0.000281047	0.0289024
ENSG00000137252	590.725	1.07416	0.295786	3.63156	0.000281715	0.0289024
ENSG00000196511	432.598	-1.58882	0.437639	-3.63043	0.00028295	0.0289261
ENSG00000170498	4.20405	-8.11419	2.23758	-3.62632	0.000287489	0.0289791
ENSG00000223361	250.991	0.760488	0.209664	3.62718	0.000286539	0.0289791
ENSG00000164220	1846.3	-0.925952	0.255201	-3.62833	0.00028526	0.0289791
ENSG00000170381	4531.37	-0.909364	0.250667	-3.62777	0.000285877	0.0289791
ENSG00000177954	30152.8	0.630499	0.174063	3.62224	0.000292065	0.0292208
ENSG00000183199	126.557	0.78784	0.217547	3.62148	0.000292927	0.0292208
ENSG00000108821	2452.54	2.67924	0.739754	3.62181	0.000292554	0.0292208
ENSG00000219507	329.16	0.73895	0.204394	3.61532	0.000299977	0.0298001
ENSG00000175782	3153.59	-0.624655	0.172814	-3.61461	0.000300802	0.0298001
ENSG00000250508	16.0177	21.2212	5.8807	3.60862	0.00030783	0.0302882
ENSG00000234268	14.576	3.72432	1.03196	3.60896	0.000307422	0.0302882
ENSG00000259234	81.4341	-4.30946	1.19483	-3.60675	0.000310054	0.0304033
ENSG00000155622	64.172	7.33628	2.03471	3.60557	0.00031147	0.030423
ENSG00000167157	22.5172	-6.42283	1.78173	-3.60482	0.000312366	0.030423
ENSG00000288531	55.2361	-5.23575	1.45755	-3.59215	0.000327962	0.0318344
ENSG00000164172	9063.5	-0.441912	0.123072	-3.59067	0.000329835	0.0318875
ENSG00000161847	6.53516	9.15766	2.55091	3.58997	0.000330721	0.0318875
ENSG00000165186	356.346	2.08793	0.581962	3.58775	0.00033355	0.032053
ENSG00000130066	35920.4	0.514822	0.14385	3.57887	0.000345078	0.0330507
ENSG00000105146	50.9056	-4.36654	1.22263	-3.57142	0.000355053	0.0338934
ENSG00000142937	20964.7	0.354885	0.099422	3.56948	0.000357692	0.0340327
ENSG00000254896	12.5122	-14.9391	4.19794	-3.55868	0.00037273	0.0353468
ENSG00000151320	18045.5	-0.466328	0.131178	-3.55492	0.000378096	0.0356298
ENSG00000100221	855.998	0.980453	0.275807	3.55486	0.000378186	0.0356298
ENSG00000134258	588.618	1.93066	0.543572	3.5518	0.000382608	0.0358124
ENSG00000162129	1624.93	0.705712	0.198657	3.55242	0.000381709	0.0358124
ENSG00000164463	1196.67	1.37203	0.386573	3.5492	0.000386401	0.0360503
ENSG00000233932	49.774	-6.91932	1.95293	-3.54304	0.000395541	0.036784
ENSG00000285748	63.8647	-5.07757	1.43411	-3.54056	0.000399279	0.0370123
ENSG00000237298	939.673	-0.634378	0.179368	-3.53674	0.000405097	0.0374313
ENSG00000188493	218.011	-2.20551	0.624141	-3.53366	0.000409843	0.0377488
ENSG00000114796	9277.28	0.576361	0.163352	3.52834	0.00041817	0.038393
ENSG00000172995	698.637	-1.83546	0.520871	-3.52382	0.000425375	0.0384424
ENSG00000102078	2252.4	-0.537939	0.152585	-3.52551	0.000422676	0.0384424
ENSG00000165637	35655.5	0.492944	0.139876	3.52414	0.000424864	0.0384424
ENSG00000140575	10735.3	0.950613	0.269739	3.52419	0.000424782	0.0384424
ENSG00000261838	29.8872	3.84839	1.0915	3.52579	0.000422216	0.0384424
ENSG00000206417	15.281	5.23732	1.48786	3.52003	0.00043149	0.0388732
ENSG00000134333	27372.4	0.336502	0.0956978	3.5163	0.000437608	0.0392046
ENSG00000173065	4827.57	0.652317	0.185521	3.51613	0.000437888	0.0392046
ENSG00000173272	1685.6	-0.456279	0.129912	-3.51223	0.000444371	0.0394178
ENSG00000111371	49087.2	0.310203	0.0883105	3.51264	0.000443673	0.0394178
ENSG00000127328	5322.95	0.608113	0.173064	3.5138	0.000441752	0.0394178
ENSG00000130943	6.84939	-23.0359	6.56681	-3.50793	0.000451606	0.0399367
ENSG00000231449	15.9478	4.82911	1.37711	3.5067	0.0004537	0.0399991
ENSG00000132357	8.53538	-18.2685	5.21491	-3.50314	0.00045981	0.0404142
ENSG00000164924	135987	0.189002	0.0540263	3.49834	0.000468172	0.0410241
ENSG00000136938	5062.29	0.334774	0.0957386	3.49675	0.000470972	0.0411444
ENSG00000124532	15462.1	0.500336	0.143235	3.4931	0.000477441	0.0415835
ENSG00000102032	163.248	1.73208	0.496242	3.49039	0.000482315	0.0417557
ENSG00000230013	35.1295	4.28513	1.22769	3.4904	0.000482291	0.0417557
ENSG00000187627	10.6674	2.80732	0.804848	3.48801	0.00048663	0.0420031
ENSG00000243701	7331.75	-0.507674	0.145736	-3.48352	0.000494863	0.0424596
ENSG00000125814	37536.5	-0.486238	0.139574	-3.48372	0.000494497	0.0424596
ENSG00000158560	8773.2	-0.596565	0.171497	-3.47857	0.000504097	0.0431235
ENSG00000140006	2715.4	0.92201	0.265154	3.47726	0.000506572	0.043207
ENSG00000168827	6878.25	-0.370946	0.106742	-3.47516	0.000510547	0.0434175
ENSG00000138160	1894.54	2.86214	0.82385	3.4741	0.000512569	0.0434613
ENSG00000254087	180.456	5.68947	1.64089	3.46731	0.000525696	0.0442855
ENSG00000166426	6556.82	-0.762241	0.219844	-3.46719	0.000525929	0.0442855
ENSG00000289415	15.3507	-4.11855	1.18803	-3.4667	0.000526898	0.0442855
ENSG00000099800	6827.83	0.352889	0.10188	3.46376	0.000532678	0.0446412
ENSG00000108599	1848.85	0.630245	0.182008	3.46273	0.000534715	0.044682
ENSG00000118181	23187.1	0.457944	0.132302	3.46135	0.000537481	0.0447833
ENSG00000271576	394.328	-1.19467	0.345541	-3.45739	0.000545437	0.045185
ENSG00000258111	6.85027	-7.59588	2.19658	-3.45805	0.000544096	0.045185
ENSG00000226564	199.012	0.690131	0.200235	3.44662	0.000567655	0.046204
ENSG00000232667	36.552	-4.29089	1.24504	-3.44639	0.000568139	0.046204
ENSG00000253208	57.3544	-4.37212	1.26731	-3.44991	0.000560771	0.046204
ENSG00000231460	239.527	-1.22445	0.355088	-3.44831	0.000564107	0.046204
ENSG00000107147	71.9924	4.4053	1.27866	3.44524	0.000570559	0.046204
ENSG00000133935	19731	0.461082	0.13383	3.44529	0.000570452	0.046204
ENSG00000178741	18088.5	0.301924	0.087568	3.44788	0.000565001	0.046204
ENSG00000197766	438.131	1.09236	0.316691	3.4493	0.000562038	0.046204
ENSG00000117122	3813.45	-1.07775	0.312964	-3.44369	0.000573832	0.046339
ENSG00000162813	1730.67	-0.7141	0.207482	-3.44175	0.000577967	0.0464129
ENSG00000129244	1496.29	-1.0444	0.303435	-3.44192	0.000577601	0.0464129
ENSG00000291233	131.174	-1.399	0.406932	-3.43793	0.00058618	0.0469416
ENSG00000231389	397.566	-1.10753	0.322301	-3.43632	0.000589675	0.0470907
ENSG00000052802	68875.4	0.618854	0.180234	3.43361	0.000595599	0.0473812
ENSG00000263400	45.6048	-5.90179	1.71906	-3.43316	0.0005966	0.0473812
ENSG00000272086	73.1948	-2.7189	0.79288	-3.42915	0.000605485	0.0477549
ENSG00000235531	950.301	-1.093	0.318633	-3.43028	0.000602968	0.0477549
ENSG00000235812	9.72984	-6.48015	1.88992	-3.42879	0.000606275	0.0477549
ENSG00000095485	1935.11	-0.557274	0.162618	-3.4269	0.000610515	0.0479579
ENSG00000110492	30854	-0.399033	0.116495	-3.42531	0.000614088	0.0481074
ENSG00000175197	4355.35	0.797045	0.232771	3.42417	0.000616689	0.0481803
ENSG00000225125	40.0806	4.16677	1.2187	3.41902	0.000628462	0.0489674
ENSG00000173559	13968.8	0.916173	0.268122	3.417	0.000633153	0.0490677
ENSG00000260918	450.554	2.76414	0.808826	3.41747	0.000632064	0.0490677
ENSG00000169962	4.31722	-16.1537	4.73319	-3.41286	0.000642859	0.0496863
ENSG00000160213	6275.16	0.420065	0.123262	3.40789	0.000654661	0.0504632
ENSG00000198492	13570.9	0.263246	0.0772918	3.40587	0.000659534	0.0505422
ENSG00000075213	3182.23	-0.767875	0.225469	-3.40569	0.000659979	0.0505422
ENSG00000180660	6089.74	-0.565801	0.166154	-3.40529	0.000660946	0.0505422
ENSG00000288030	268.263	3.90401	1.14709	3.40339	0.000665543	0.0506251
ENSG00000091656	1415.78	-1.12226	0.329744	-3.40342	0.000665469	0.0506251
ENSG00000129596	10022.3	-0.556819	0.163921	-3.39688	0.000681578	0.0513034
ENSG00000280406	29.3557	5.85147	1.72209	3.39788	0.000679097	0.0513034
ENSG00000196476	1709.16	-0.589085	0.173419	-3.3969	0.00068154	0.0513034
ENSG00000233927	4960.23	0.544995	0.160413	3.39745	0.000680165	0.0513034
ENSG00000225446	41.2324	-5.53597	1.63084	-3.39455	0.000687404	0.0513295
ENSG00000116679	31156.1	0.360974	0.106425	3.39182	0.000694303	0.0513295
ENSG00000172493	1057.55	0.906091	0.267253	3.39038	0.000697949	0.0513295
ENSG00000274750	1412.22	-1.37879	0.406631	-3.39077	0.000696977	0.0513295
ENSG00000170419	4628.31	-0.489495	0.144323	-3.39167	0.000694679	0.0513295
ENSG00000149294	8243.5	-0.617268	0.181963	-3.39227	0.000693159	0.0513295
ENSG00000276957	29.0681	-4.6783	1.37951	-3.39127	0.000695695	0.0513295
ENSG00000167984	150.524	3.14301	0.92652	3.39228	0.000693138	0.0513295
ENSG00000099937	41.5325	4.98108	1.46685	3.39576	0.00068439	0.0513295
ENSG00000162981	2304.16	-1.23038	0.363103	-3.3885	0.000702748	0.0515509
ENSG00000215184	17.2269	5.57204	1.64728	3.38258	0.000718079	0.0525419
ENSG00000277290	6.12504	-7.26997	2.15296	-3.37673	0.000733542	0.0535375
ENSG00000223259	42.302	-3.64203	1.0792	-3.37474	0.000738862	0.0537895
ENSG00000275367	72.7727	-5.02375	1.49001	-3.37163	0.000747259	0.0542186
ENSG00000275234	17.0641	5.23756	1.55364	3.37116	0.000748517	0.0542186
ENSG00000234685	87.4145	1.61527	0.479383	3.36948	0.0007531	0.0544138
ENSG00000147255	1658.7	-0.758632	0.22566	-3.36183	0.00077427	0.0558036
ENSG00000274211	707.463	0.866485	0.257873	3.36012	0.000779093	0.0560111
ENSG00000287962	45.1082	-5.94526	1.77123	-3.35656	0.000789174	0.0565948
ENSG00000170017	20793.3	-0.568931	0.169628	-3.35398	0.00079657	0.0569009
ENSG00000275038	48.6406	-7.14224	2.12966	-3.3537	0.000797391	0.0569009
ENSG00000176761	8.40512	-7.18639	2.14786	-3.34583	0.000820362	0.0583956
ENSG00000152661	10648.6	4.38573	1.3118	3.3433	0.000827876	0.0587853
ENSG00000184203	18954.1	0.364016	0.109026	3.3388	0.0008414	0.0595988
ENSG00000239268	590.986	-0.887267	0.265984	-3.33579	0.000850586	0.0597247
ENSG00000155545	3264.86	0.522901	0.15671	3.33673	0.000847694	0.0597247
ENSG00000276867	5.27332	11.6656	3.49742	3.3355	0.000851464	0.0597247
ENSG00000153822	210.957	-1.95138	0.584687	-3.33747	0.000845445	0.0597247
ENSG00000253507	42.7411	4.57976	1.37425	3.33255	0.000860535	0.0602096
ENSG00000180425	2903.01	-0.57949	0.173957	-3.33123	0.000864643	0.0602096
ENSG00000089902	763.087	1.20972	0.363102	3.33161	0.000863452	0.0602096
ENSG00000186767	4216.59	-0.768844	0.230913	-3.32959	0.000869743	0.0604189
ENSG00000276223	10.3861	5.16414	1.55135	3.32879	0.000872234	0.0604462
ENSG00000089775	1163.27	0.831695	0.250254	3.3234	0.00088927	0.061479
ENSG00000197982	2454.17	-0.46908	0.141178	-3.32262	0.000891755	0.0615034
ENSG00000237481	8.87051	-8.02445	2.41769	-3.31906	0.000903211	0.0619969
ENSG00000244558	195.381	1.75391	0.528354	3.31958	0.000901528	0.0619969
ENSG00000196151	1410.28	0.676073	0.204017	3.31381	0.000920326	0.0626812
ENSG00000118263	9737.65	-0.596071	0.179798	-3.31523	0.000915664	0.0626812
ENSG00000092820	32796.3	0.590297	0.17812	3.31404	0.000919598	0.0626812
ENSG00000129521	620.617	1.31416	0.396627	3.31334	0.000921878	0.0626812
ENSG00000115204	5034.69	0.47632	0.143926	3.30947	0.000934735	0.0634058
ENSG00000262198	899.559	1.13623	0.343609	3.30675	0.000943837	0.0638729
ENSG00000143653	8021.8	-0.576312	0.174642	-3.29996	0.000966977	0.0642627
ENSG00000142676	19946.7	0.382638	0.115869	3.30234	0.000958829	0.0642627
ENSG00000184163	76.4613	-5.43226	1.64568	-3.30092	0.000963671	0.0642627
ENSG00000109321	156.235	7.90665	2.39655	3.29919	0.000969658	0.0642627
ENSG00000213760	11708.3	-0.386353	0.116993	-3.30236	0.000958742	0.0642627
ENSG00000180694	875.704	1.16616	0.353328	3.30051	0.000965092	0.0642627
ENSG00000198610	45.7111	4.78602	1.4506	3.29935	0.000969088	0.0642627
ENSG00000184613	6697.27	-0.502341	0.152139	-3.30187	0.000960441	0.0642627
ENSG00000124151	3045.92	0.676324	0.20498	3.29946	0.000968722	0.0642627
ENSG00000176641	1458.85	-0.697361	0.211539	-3.29661	0.000978577	0.064705
ENSG00000158470	1851.06	0.594295	0.180338	3.29546	0.00098261	0.064823
ENSG00000214039	49.4696	6.50695	1.97535	3.29407	0.000987476	0.0649953
ENSG00000226900	29.2311	4.13405	1.25677	3.28942	0.00100395	0.0658061
ENSG00000090487	5280.87	0.365807	0.111211	3.2893	0.00100436	0.0658061
ENSG00000157551	42.419	7.62162	2.31924	3.28626	0.00101528	0.0663708
ENSG00000185222	11004.3	0.463696	0.141169	3.28469	0.00102096	0.0665911
ENSG00000205544	362.726	0.663231	0.201984	3.28358	0.00102499	0.0667031
ENSG00000286580	156.398	-2.87982	0.878049	-3.27979	0.00103884	0.067452
ENSG00000198105	537.342	3.44688	1.05163	3.27766	0.0010467	0.0678099
ENSG00000148948	2603.4	-0.920784	0.28105	-3.27623	0.00105203	0.0680023
ENSG00000164120	947.375	1.80462	0.551153	3.27427	0.00105935	0.0683223
ENSG00000141750	50.1513	2.80754	0.858904	3.26875	0.00108023	0.0695134
ENSG00000270174	3.48394	-8.89368	2.72301	-3.26613	0.0010903	0.0699244
ENSG00000136960	1328.93	-1.26161	0.386307	-3.26582	0.00109147	0.0699244
ENSG00000143850	1267.59	0.863692	0.264823	3.26139	0.00110866	0.0708683
ENSG00000150556	725.675	-2.96659	0.910057	-3.25979	0.00111496	0.0711133
ENSG00000102547	2942.68	-0.711749	0.218553	-3.25664	0.0011274	0.0717478
ENSG00000252690	36.5376	-2.09199	0.643443	-3.25124	0.00114902	0.0729628
ENSG00000143502	2905.36	-0.69881	0.21512	-3.24847	0.00116027	0.0729816
ENSG00000288758	39.6354	-5.57802	1.71706	-3.24859	0.00115979	0.0729816
ENSG00000282381	62.0241	5.83977	1.7974	3.249	0.00115811	0.0729816
ENSG00000225806	24.1872	-3.31848	1.02106	-3.25004	0.00115388	0.0729816
ENSG00000251247	996.853	-0.850284	0.261783	-3.24805	0.00116197	0.0729816
ENSG00000235914	16.9706	-5.12619	1.57888	-3.24672	0.00116742	0.0731645
ENSG00000120332	15.6038	-7.92626	2.44388	-3.24332	0.00118147	0.0738844
ENSG00000283683	32.4644	3.87585	1.19837	3.23428	0.00121949	0.076097
ENSG00000085231	5644.54	0.722192	0.22344	3.23216	0.0012286	0.0764994
ENSG00000144642	11589.8	-0.685777	0.212372	-3.22913	0.00124168	0.0771472
ENSG00000257522	39.5094	7.20249	2.23104	3.22831	0.00124525	0.0772027
ENSG00000108379	625.088	1.32193	0.40989	3.22509	0.00125934	0.0779089
ENSG00000120156	669.497	-7.93754	2.46171	-3.2244	0.00126239	0.0779302
ENSG00000142959	78.3535	-2.06385	0.640379	-3.22287	0.00126915	0.0781803
ENSG00000197506	17.2204	-9.16519	2.84628	-3.22006	0.00128164	0.0787813
ENSG00000249150	55.5641	-2.78226	0.864977	-3.21657	0.00129732	0.079238
ENSG00000112245	79.9341	-1.99269	0.619375	-3.21726	0.00129419	0.079238
ENSG00000286069	397.649	-1.30909	0.406967	-3.2167	0.00129675	0.079238
ENSG00000158615	1595	0.921833	0.286728	3.21501	0.0013044	0.0793344
ENSG00000189058	356.51	1.09344	0.340084	3.21519	0.00130358	0.0793344
ENSG00000058866	49.0015	-4.21755	1.31258	-3.21318	0.00131276	0.0796746
ENSG00000163328	4039.16	-0.503059	0.156648	-3.21139	0.00132093	0.0799754
ENSG00000185551	3197.2	4.49128	1.39897	3.21041	0.00132544	0.0799754
ENSG00000166482	54.5098	-6.26879	1.95272	-3.21029	0.00132603	0.0799754
ENSG00000273373	125.92	1.95011	0.607657	3.20923	0.00133089	0.0801007
ENSG00000155307	1050.98	-1.17711	0.367062	-3.20684	0.00134201	0.0806016
ENSG00000289553	5.64123	-6.87929	2.14593	-3.20574	0.00134716	0.0806181
ENSG00000238098	275.041	1.97872	0.617271	3.20559	0.00134788	0.0806181
ENSG00000067064	43516.4	0.455112	0.142041	3.20409	0.00135492	0.0807043
ENSG00000277228	41.2761	4.57059	1.42644	3.20419	0.00135443	0.0807043
ENSG00000223984	4.38159	-4.91091	1.53357	-3.20227	0.00136347	0.0810462
ENSG00000157890	231.804	1.87059	0.584286	3.20149	0.00136717	0.0810991
ENSG00000237525	9.60803	-11.7553	3.67363	-3.1999	0.00137474	0.0813807
ENSG00000270332	53.9774	-3.67762	1.15037	-3.19689	0.00138916	0.0820658
ENSG00000116898	9501.47	0.327042	0.102337	3.19573	0.00139478	0.0822295
ENSG00000253370	21.3704	3.83066	1.19926	3.19419	0.00140223	0.0823357
ENSG00000172137	303.672	1.30758	0.409364	3.19418	0.0014023	0.0823357
ENSG00000205903	230.154	1.01964	0.319552	3.19085	0.00141854	0.0829557
ENSG00000280870	1099.71	-2.17138	0.680504	-3.19084	0.00141861	0.0829557
ENSG00000144834	22603.7	-0.410079	0.128638	-3.18785	0.00143333	0.0834779
ENSG00000154553	557.465	-1.51613	0.475593	-3.18788	0.00143321	0.0834779
ENSG00000240520	105.819	-3.2592	1.02335	-3.18484	0.00144833	0.0838432
ENSG00000223941	127.668	-3.95447	1.24162	-3.18493	0.00144789	0.0838432
ENSG00000255559	29.7959	5.90236	1.85284	3.18557	0.00144471	0.0838432
ENSG00000259286	14.805	5.54817	1.74324	3.18267	0.00145924	0.0843056
ENSG00000269688	6.65566	4.7077	1.48043	3.17996	0.00147296	0.0849277
ENSG00000175592	534.49	-2.50626	0.788774	-3.17742	0.00148593	0.0853345
ENSG00000101349	1779.05	-0.880238	0.276983	-3.17796	0.00148317	0.0853345
ENSG00000240303	106.366	-1.10161	0.347053	-3.17419	0.00150256	0.0857144
ENSG00000151726	4414.99	-0.760288	0.239525	-3.17414	0.00150279	0.0857144
ENSG00000176956	592.795	-2.84795	0.897323	-3.17383	0.00150444	0.0857144
ENSG00000065717	36.8328	4.25124	1.3388	3.17542	0.00149621	0.0857144
ENSG00000222418	13.0208	4.78843	1.50933	3.17255	0.00151107	0.0859225
ENSG00000230622	31.5586	2.69258	0.849551	3.16942	0.00152743	0.0866814
ENSG00000269481	7.42101	-6.95421	2.19711	-3.16516	0.00154996	0.0877874
ENSG00000134115	828.424	-0.83802	0.264985	-3.16252	0.00156408	0.0882404
ENSG00000228118	6.19682	3.49063	1.1036	3.16295	0.00156181	0.0882404
ENSG00000205268	1681.9	0.8675	0.274404	3.1614	0.00157014	0.0884092
ENSG00000134215	740.18	-0.798335	0.25273	-3.15884	0.00158396	0.0888406
ENSG00000109511	103.084	-4.89648	1.55002	-3.15898	0.00158321	0.0888406
ENSG00000280234	608.134	-2.34139	0.741481	-3.15772	0.0015901	0.0890116
ENSG00000260871	23.5538	5.36146	1.69891	3.15582	0.00160046	0.0890725
ENSG00000176076	39.4816	-6.09021	1.92953	-3.15631	0.00159776	0.0890725
ENSG00000267316	35.9627	-3.81503	1.2085	-3.15684	0.0015949	0.0890725
ENSG00000102401	15812	-0.305914	0.0969972	-3.15384	0.00161135	0.0893337
ENSG00000155714	54.0272	-3.22227	1.02166	-3.15396	0.0016107	0.0893337
ENSG00000272862	78.1602	-2.21442	0.702956	-3.15016	0.00163184	0.090296
ENSG00000227857	45.9041	1.99258	0.63309	3.14738	0.00164741	0.0907151
ENSG00000285971	16.1792	-5.64817	1.79471	-3.14712	0.00164885	0.0907151
ENSG00000226864	48.1493	3.35929	1.06725	3.1476	0.00164617	0.0907151
ENSG00000114125	10817.2	0.274829	0.0873449	3.14648	0.00165248	0.0907416
ENSG00000229865	39.16	-4.35631	1.38487	-3.14565	0.00165721	0.0908281
ENSG00000075223	7480.58	-0.614297	0.19534	-3.14476	0.00166221	0.0908489
ENSG00000177485	6351.06	-0.510142	0.162235	-3.14447	0.00166389	0.0908489
ENSG00000261488	40.6963	-5.69497	1.81353	-3.14027	0.00168791	0.0919077
ENSG00000140948	679.247	1.09995	0.350307	3.13997	0.00168966	0.0919077
ENSG00000197085	4.82498	-12.2729	3.91101	-3.13803	0.00170086	0.092343
ENSG00000187682	89.1299	4.43272	1.41303	3.13703	0.00170667	0.0924841
ENSG00000211459	51426.8	0.413209	0.131757	3.13615	0.00171184	0.0925904
ENSG00000230797	61.1994	-2.25638	0.720041	-3.13368	0.00172629	0.0927193
ENSG00000102024	62283	0.779191	0.248705	3.133	0.00173031	0.0927193
ENSG00000277715	40.3971	-4.11847	1.31407	-3.13414	0.00172358	0.0927193
ENSG00000136099	71.0634	-3.11599	0.99455	-3.13306	0.00172994	0.0927193
ENSG00000263627	7.40179	-5.05371	1.61289	-3.13332	0.00172838	0.0927193
ENSG00000257818	68.4988	3.68338	1.17738	3.12846	0.00175722	0.0938129
ENSG00000279583	11.1858	4.66524	1.49106	3.12881	0.00175516	0.0938129
ENSG00000172183	396.247	0.925768	0.296059	3.12697	0.00176621	0.0941182
ENSG00000265485	247.91	1.65571	0.529971	3.12415	0.0017832	0.0948483
ENSG00000273925	8.82168	8.01186	2.56497	3.12357	0.00178673	0.094861
ENSG00000129757	3111.42	0.911558	0.291992	3.12186	0.00179714	0.0950636
ENSG00000261774	17.6283	-4.67023	1.49574	-3.12235	0.00179415	0.0950636
ENSG00000287500	7.87957	-5.13852	1.64757	-3.11886	0.00181554	0.0958612
ENSG00000287829	37.0851	3.77991	1.21315	3.11578	0.00183459	0.0966902
ENSG00000287738	11.6845	5.91965	1.90214	3.1121	0.00185759	0.0975216
ENSG00000113163	6353.93	0.47413	0.152373	3.11164	0.00186052	0.0975216
ENSG00000180992	7176.97	0.41832	0.134427	3.11187	0.00185904	0.0975216
ENSG00000223263	5.80481	-4.30365	1.384	-3.10957	0.0018736	0.097841
ENSG00000108239	692.709	1.16109	0.373327	3.11011	0.00187017	0.097841
ENSG00000259200	18.1444	4.96668	1.59748	3.10907	0.00187679	0.097841
ENSG00000124134	27.1376	6.13534	1.97537	3.10592	0.0018969	0.0987109
ENSG00000230027	36.6197	4.64077	1.49516	3.10387	0.00191008	0.0990389
ENSG00000250543	8.55043	-6.88429	2.21778	-3.10414	0.00190833	0.0990389
ENSG00000130816	3730.06	0.420692	0.135746	3.09912	0.00194098	0.100461
ENSG00000145526	5355.03	-0.702184	0.226884	-3.0949	0.00196876	0.101534
ENSG00000113161	62384.7	0.447906	0.144714	3.09511	0.0019674	0.101534
ENSG00000132466	12027.4	-0.454308	0.146959	-3.09139	0.00199225	0.102197
ENSG00000198918	9756.15	0.520789	0.16844	3.09184	0.00198917	0.102197
ENSG00000087586	3458.27	1.11678	0.361202	3.09185	0.00198915	0.102197
ENSG00000173894	176.915	1.69291	0.548259	3.08778	0.00201656	0.10326
ENSG00000185261	973.149	-1.14188	0.370006	-3.0861	0.00202802	0.10359
ENSG00000121297	584.552	-0.887994	0.28777	-3.08578	0.0020302	0.10359
ENSG00000213741	8767.79	0.564711	0.183041	3.08516	0.00203444	0.103623
ENSG00000285961	6.20273	-15.674	5.08459	-3.08266	0.00205162	0.104131
ENSG00000128594	642.579	-0.70318	0.22807	-3.08318	0.00204803	0.104131
ENSG00000289165	11.6005	-3.82361	1.24073	-3.08173	0.00205799	0.10427
ENSG00000227097	138.184	0.773404	0.251032	3.0809	0.00206377	0.10438
ENSG00000213442	1436.25	0.376409	0.122238	3.07931	0.00207481	0.104571
ENSG00000130724	8495.43	0.304935	0.0990258	3.07935	0.0020745	0.104571
ENSG00000269526	5.2809	6.21424	2.01976	3.07672	0.00209293	0.1053
ENSG00000173207	6683.59	0.592071	0.192625	3.0737	0.00211423	0.106055
ENSG00000104518	59.9099	-3.29756	1.07325	-3.07251	0.00212264	0.106055
ENSG00000260788	12.3058	8.06828	2.62568	3.07283	0.0021204	0.106055
ENSG00000184164	1922.26	-1.28112	0.416824	-3.07352	0.00211551	0.106055
ENSG00000165621	109.681	-7.2344	2.35617	-3.07041	0.00213764	0.106473
ENSG00000157368	13.8407	-8.05595	2.62383	-3.07031	0.0021384	0.106473
ENSG00000231985	42.5934	3.67041	1.19676	3.06695	0.00216256	0.107491
ENSG00000173517	1903.01	-0.59778	0.194959	-3.06618	0.00216816	0.107583
ENSG00000105372	81331.7	0.331085	0.108056	3.06401	0.0021839	0.108178
ENSG00000229808	10.8174	-7.77205	2.53792	-3.06237	0.00219589	0.108585
ENSG00000125691	22459.8	0.467233	0.152777	3.05827	0.00222616	0.109894
ENSG00000256537	6551.73	-0.330564	0.108132	-3.05704	0.00223534	0.110158
ENSG00000286964	274.415	-1.428	0.467236	-3.05628	0.00224099	0.110248
ENSG00000163909	22.86	-7.25443	2.3752	-3.05424	0.00225631	0.110436
ENSG00000144331	186.423	-2.2105	0.72369	-3.05448	0.00225448	0.110436
ENSG00000221818	4361.95	-0.767944	0.251383	-3.05487	0.00225156	0.110436
ENSG00000173281	290.826	1.61799	0.530259	3.05132	0.00227837	0.111328
ENSG00000254938	29.1873	3.65118	1.19702	3.05023	0.00228663	0.111542
ENSG00000168826	563.024	1.34347	0.440766	3.04803	0.00230344	0.111715
ENSG00000227081	608.896	0.632841	0.207642	3.04774	0.00230567	0.111715
ENSG00000182107	120.707	-3.73889	1.22674	-3.04781	0.00230512	0.111715
ENSG00000228835	25.0616	3.44953	1.13154	3.04853	0.00229965	0.111715
ENSG00000205642	14.0641	4.06508	1.33416	3.04693	0.00231194	0.111831
ENSG00000082397	4998.65	-0.718935	0.236152	-3.04438	0.00233161	0.112593
ENSG00000183977	69.4701	-2.57059	0.844785	-3.0429	0.00234314	0.112802
ENSG00000125726	1115.75	0.838829	0.275675	3.04282	0.00234376	0.112802
ENSG00000110218	1506.75	-0.592034	0.194798	-3.03921	0.00237196	0.113969
ENSG00000232811	38.1201	-3.76329	1.23852	-3.03854	0.00237725	0.114033
ENSG00000145293	9954.69	0.317668	0.104566	3.03797	0.0023818	0.114061
ENSG00000225693	11.4707	4.34599	1.43163	3.03568	0.00239994	0.114669
ENSG00000278971	16.6431	-7.85548	2.58799	-3.03537	0.00240244	0.114669
ENSG00000100097	2724.96	0.725966	0.239252	3.03432	0.00241077	0.114876
ENSG00000260988	4.4992	-9.76516	3.21908	-3.03352	0.00241715	0.11499
ENSG00000154678	875.088	-1.40478	0.463384	-3.03156	0.00243294	0.115393
ENSG00000290848	49.0711	-2.02705	0.668668	-3.03148	0.00243362	0.115393
ENSG00000115353	315.361	-2.8618	0.944596	-3.02966	0.0024483	0.115898
ENSG00000248475	18.7839	3.71419	1.22622	3.02899	0.00245377	0.115967
ENSG00000273004	8.94878	-5.88934	1.94605	-3.0263	0.0024757	0.116621
ENSG00000273365	17.7917	6.33607	2.09334	3.02678	0.00247174	0.116621
ENSG00000104824	705.549	0.666759	0.220441	3.02465	0.00248917	0.117064
ENSG00000163012	44.6192	-5.35209	1.76996	-3.02385	0.00249581	0.117185
ENSG00000232053	3147.85	-0.842364	0.278649	-3.02302	0.00250264	0.117315
ENSG00000104689	440.333	5.65982	1.87294	3.02189	0.00251204	0.117564
ENSG00000162643	1335.16	-1.24416	0.411895	-3.02058	0.00252287	0.117689
ENSG00000269837	337.644	-0.765208	0.253324	-3.02067	0.00252218	0.117689
ENSG00000165617	64.7913	2.27348	0.752784	3.02009	0.00252698	0.11769
ENSG00000246379	237.245	-1.22128	0.404483	-3.01935	0.00253314	0.117787
ENSG00000248905	405.102	-1.34486	0.445569	-3.0183	0.00254196	0.117993
ENSG00000103018	32087.3	0.366972	0.1216	3.01785	0.00254575	0.117993
ENSG00000234797	527.377	0.557797	0.184888	3.01694	0.0025534	0.118157
ENSG00000286736	14.1198	5.47347	1.81479	3.01604	0.00256101	0.118319
ENSG00000112972	52979.5	0.747844	0.248017	3.01529	0.00256734	0.118422
ENSG00000282164	290.795	-2.15195	0.714232	-3.01296	0.00258717	0.119146
ENSG00000117448	11593.8	0.245646	0.0815509	3.01218	0.00259379	0.119261
ENSG00000205116	32.6456	-5.55535	1.84609	-3.00924	0.002619	0.120228
ENSG00000120658	1100.73	-0.886081	0.294524	-3.00852	0.00262521	0.120321
ENSG00000224533	6.40348	-5.23435	1.7402	-3.00791	0.00263054	0.120374
ENSG00000206262	37.5327	6.06456	2.01815	3.00501	0.00265575	0.121143
ENSG00000234187	13.0916	4.90066	1.63072	3.0052	0.00265405	0.121143
ENSG00000226221	72.9749	1.01632	0.33828	3.00438	0.00266123	0.121202
ENSG00000109929	43501.8	0.723694	0.240939	3.00364	0.00266769	0.121304
ENSG00000259395	12.4723	12.2415	4.07685	3.00269	0.00267602	0.121491
ENSG00000101003	4182.7	-0.660739	0.220086	-3.00218	0.00268054	0.121505
ENSG00000230393	32.1973	-5.20305	1.73425	-3.00017	0.00269827	0.121548
ENSG00000251614	10.2657	-7.2592	2.42036	-2.99922	0.00270669	0.121548
ENSG00000242516	406.676	-1.36568	0.455292	-2.99957	0.00270358	0.121548
ENSG00000138823	174.311	-3.01326	1.00434	-3.00025	0.00269759	0.121548
ENSG00000102265	4530	0.369304	0.123134	2.99921	0.00270678	0.121548
ENSG00000274898	15.7825	6.65759	2.21925	2.99992	0.0027005	0.121548
ENSG00000063046	15788.5	0.640854	0.213754	2.99809	0.00271678	0.121807
ENSG00000166669	818.147	-0.768703	0.25648	-2.99713	0.00272538	0.122003
ENSG00000168811	285.792	1.58647	0.529541	2.99593	0.00273607	0.122292
ENSG00000288710	7.63504	2.99944	1.00188	2.99382	0.00275511	0.122952
ENSG00000272854	4.6477	-8.62273	2.88116	-2.99279	0.00276435	0.123174
ENSG00000198795	1808.42	-0.740359	0.247673	-2.98926	0.00279653	0.124415
ENSG00000227398	323.2	-1.21578	0.407199	-2.98571	0.00282925	0.12514
ENSG00000072042	20240	0.385527	0.129107	2.9861	0.00282557	0.12514
ENSG00000240589	3.56314	-8.32495	2.78809	-2.98589	0.00282751	0.12514
ENSG00000219438	171.272	-1.56765	0.525071	-2.9856	0.00283019	0.12514
ENSG00000224114	1556.08	0.423665	0.142046	2.98259	0.00285819	0.12536
ENSG00000038382	1477.48	0.595446	0.199528	2.98427	0.00284255	0.12536
ENSG00000244219	31.768	2.81777	0.94587	2.97902	0.00289168	0.12536
ENSG00000251192	400.525	1.13526	0.380901	2.98046	0.00287817	0.12536
ENSG00000222810	7.67933	6.06099	2.03243	2.98215	0.00286235	0.12536
ENSG00000261437	36.4236	5.0153	1.68116	2.98323	0.00285219	0.12536
ENSG00000227383	20.0135	4.88886	1.64096	2.97927	0.0028894	0.12536
ENSG00000236552	747.826	0.409025	0.137232	2.98053	0.0028775	0.12536
ENSG00000273747	6.88503	-5.72617	1.92174	-2.97968	0.00288553	0.12536
ENSG00000214575	859.025	-0.878098	0.294373	-2.98295	0.00285489	0.12536
ENSG00000267658	18.5382	-3.13589	1.05246	-2.97957	0.0028865	0.12536
ENSG00000262558	13.4022	-4.70024	1.57653	-2.98138	0.00286949	0.12536
ENSG00000286642	37.6757	4.93488	1.65492	2.98194	0.00286431	0.12536
ENSG00000157388	236.443	-2.19894	0.738278	-2.97847	0.00289692	0.125398
ENSG00000163739	61.072	7.18623	2.41553	2.97501	0.0029298	0.126494
ENSG00000148219	2535.09	-0.575744	0.193535	-2.97488	0.00293101	0.126494
ENSG00000197756	22571.2	0.454246	0.152826	2.9723	0.00295573	0.126802
ENSG00000278934	7.24939	-8.33903	2.80518	-2.97273	0.00295166	0.126802
ENSG00000164484	2429.32	-0.497194	0.167241	-2.97292	0.00294981	0.126802
ENSG00000157326	879.998	-0.3274	0.110134	-2.97273	0.00295162	0.126802
ENSG00000242125	1035.3	0.678178	0.228784	2.96427	0.00303397	0.1291
ENSG00000178567	10835.3	-0.491054	0.165589	-2.9655	0.00302189	0.1291
ENSG00000286147	4.53659	5.01941	1.69299	2.96481	0.00302867	0.1291
ENSG00000226965	92.5403	-3.31743	1.11913	-2.96429	0.00303383	0.1291
ENSG00000126950	5656.99	-0.635385	0.214207	-2.96622	0.00301488	0.1291
ENSG00000213888	51.0166	-3.15809	1.06546	-2.96405	0.00303617	0.1291
ENSG00000158301	4331.19	-1.22584	0.413715	-2.96299	0.00304663	0.129354
ENSG00000185127	827.669	-0.808755	0.273182	-2.9605	0.00307144	0.12949
ENSG00000255310	1942.39	-0.751258	0.253624	-2.9621	0.00305548	0.12949
ENSG00000289405	157.187	2.28024	0.770161	2.96073	0.00306907	0.12949
ENSG00000110700	24279.7	0.29361	0.0991717	2.96062	0.00307016	0.12949
ENSG00000108984	4740.33	-0.607806	0.205311	-2.96041	0.00307231	0.12949
ENSG00000114315	298.857	1.00188	0.338482	2.95992	0.00307724	0.129509
ENSG00000287709	34.972	-6.92988	2.3434	-2.95718	0.00310464	0.130375
ENSG00000167634	10.197	8.08839	2.73537	2.95696	0.00310687	0.130375
ENSG00000128805	2110.08	-0.501499	0.169628	-2.95647	0.00311186	0.130395
ENSG00000185567	613.815	1.24885	0.422666	2.9547	0.00312968	0.130952
ENSG00000151490	7335.83	-0.834148	0.282362	-2.95418	0.00313505	0.130986
ENSG00000213261	94.4321	0.656356	0.222322	2.95227	0.00315445	0.131606
ENSG00000137154	50468.7	0.29501	0.0999532	2.95148	0.00316255	0.131753
ENSG00000163041	17800.3	0.317951	0.107774	2.95016	0.00317614	0.132128
ENSG00000251536	5.13147	-10.3087	3.49492	-2.94963	0.00318153	0.132162
ENSG00000119888	22624.2	0.340525	0.115503	2.94819	0.00319639	0.132513
ENSG00000286550	15.5876	6.42011	2.17784	2.94792	0.00319918	0.132513
ENSG00000230205	9.21105	-4.72453	1.60335	-2.94666	0.00321223	0.132517
ENSG00000091129	8456.61	-0.626228	0.212482	-2.94721	0.00320653	0.132517
ENSG00000177675	3959.99	-0.994673	0.337568	-2.94658	0.00321306	0.132517
ENSG00000256546	319.983	0.889827	0.302145	2.94503	0.00322922	0.132993
ENSG00000148053	5040.89	-0.830722	0.282197	-2.94376	0.00324247	0.13329
ENSG00000089127	36.4222	-7.44651	2.52985	-2.94346	0.00324569	0.13329
ENSG00000164258	10111.3	0.343184	0.116689	2.94101	0.00327145	0.134158
ENSG00000287898	22.1173	3.94035	1.34087	2.93866	0.00329639	0.134988
ENSG00000144644	77.2482	-4.80791	1.63637	-2.93816	0.00330169	0.135013
ENSG00000280157	38.2331	-4.74624	1.61811	-2.9332	0.00335485	0.135936
ENSG00000003509	2759.05	0.5711	0.194717	2.93298	0.00335725	0.135936
ENSG00000261829	13.7858	4.52109	1.54101	2.93384	0.00334798	0.135936
ENSG00000145982	1854.77	-0.555072	0.18909	-2.93549	0.00333019	0.135936
ENSG00000258035	18.3512	-6.79141	2.31475	-2.93397	0.00334653	0.135936
ENSG00000232187	100.37	0.696719	0.237405	2.93473	0.0033384	0.135936
ENSG00000101162	12.7277	4.79268	1.63305	2.9348	0.00333761	0.135936
ENSG00000236975	36.3187	-4.95952	1.69172	-2.93165	0.00337167	0.136328
ENSG00000229117	15440.9	0.3275	0.111793	2.92953	0.00339474	0.137068
ENSG00000235674	7.75282	-4.58327	1.56759	-2.92377	0.00345815	0.139434
ENSG00000133226	13135.4	0.46446	0.158898	2.92301	0.0034667	0.139583
ENSG00000173482	1542.37	-0.898864	0.307633	-2.92187	0.00347936	0.139897
ENSG00000173706	1570.58	0.908586	0.311135	2.92023	0.00349769	0.140243
ENSG00000152443	3218.9	-0.574007	0.19654	-2.92056	0.00349405	0.140243
ENSG00000096717	1088.6	0.97971	0.335571	2.91953	0.00350561	0.140366
ENSG00000156265	46.8026	-4.94393	1.6941	-2.91832	0.00351928	0.140718
ENSG00000234917	9.47668	-3.41994	1.17339	-2.91459	0.00356155	0.140858
ENSG00000075391	5696.09	0.638854	0.219087	2.91598	0.00354572	0.140858
ENSG00000249359	27.6798	-4.35393	1.49312	-2.91599	0.00354564	0.140858
ENSG00000174695	32155	-0.260777	0.0894675	-2.91477	0.00355953	0.140858
ENSG00000227382	7.82306	-5.94557	2.03965	-2.915	0.00355694	0.140858
ENSG00000130921	2997.88	0.678975	0.232915	2.91512	0.00355555	0.140858
ENSG00000130208	733.033	0.5184	0.177865	2.91456	0.00356189	0.140858
ENSG00000230107	18.3825	4.13929	1.41976	2.91549	0.00355128	0.140858
ENSG00000195401	5.31311	-6.33338	2.17385	-2.91343	0.00357478	0.141175
ENSG00000007062	2217.27	-6.34193	2.17752	-2.91246	0.00358594	0.141211
ENSG00000146282	13355.1	-0.331003	0.113642	-2.91268	0.00358336	0.141211
ENSG00000149970	4202.97	-0.439084	0.150781	-2.91207	0.00359041	0.141211
ENSG00000122786	45638.7	0.796175	0.273484	2.91122	0.00360015	0.141402
ENSG00000145675	5643.61	0.480524	0.16518	2.90908	0.00362491	0.141906
ENSG00000253711	4.59573	-8.604	2.95716	-2.90954	0.00361957	0.141906
ENSG00000204839	23.4227	4.8383	1.66331	2.90884	0.00362776	0.141906
ENSG00000270804	70.4966	1.17822	0.405516	2.90547	0.00366698	0.143246
ENSG00000288868	174.729	-1.57904	0.54367	-2.90441	0.00367941	0.143537
ENSG00000130635	127.758	-3.43783	1.18397	-2.90365	0.00368843	0.143694
ENSG00000075218	671.285	-4.51924	1.55793	-2.9008	0.00372213	0.144811
ENSG00000167210	46.8905	-3.94449	1.36005	-2.90024	0.00372878	0.144874
ENSG00000214264	17.408	-5.58972	1.92786	-2.89944	0.00373824	0.145047
ENSG00000146223	11814.9	0.334664	0.115442	2.89897	0.00374395	0.145073
ENSG00000168497	288.82	6.63035	2.28748	2.89854	0.00374906	0.145076
ENSG00000197776	476.931	-1.58414	0.547155	-2.89522	0.0037889	0.146421
ENSG00000115268	32166.3	0.294727	0.101818	2.89464	0.00379593	0.146496
ENSG00000116016	1046.36	2.75919	0.953808	2.89281	0.00381811	0.147155
ENSG00000155090	1633.15	0.828798	0.286623	2.8916	0.00383285	0.147329
ENSG00000167005	6742.28	-0.345707	0.119554	-2.89163	0.00383249	0.147329
ENSG00000090512	27.1406	-6.25542	2.16362	-2.89118	0.00383803	0.147332
ENSG00000164318	65.2321	-3.07133	1.06289	-2.88962	0.00385714	0.147869
ENSG00000264964	69.2431	-1.67104	0.578654	-2.88781	0.00387937	0.148524
ENSG00000187554	184.643	2.91951	1.01119	2.88721	0.00388675	0.148609
ENSG00000031081	11.5524	-6.32954	2.19274	-2.88659	0.00389446	0.14861
ENSG00000244730	6.7288	6.50109	2.25234	2.88637	0.00389708	0.14861
ENSG00000163539	41231.9	-0.289193	0.10026	-2.88444	0.00392108	0.149327
ENSG00000223751	91.1223	-2.04548	0.709669	-2.88231	0.00394771	0.150143
ENSG00000117971	259.067	-2.93888	1.02008	-2.88104	0.00396366	0.150202
ENSG00000101773	4938.48	-0.628273	0.218079	-2.88094	0.00396488	0.150202
ENSG00000123810	426.37	-0.796599	0.276493	-2.88108	0.00396318	0.150202
ENSG00000214875	3.84106	-10.2678	3.56577	-2.87955	0.0039824	0.150401
ENSG00000136021	7587.95	-0.31898	0.110785	-2.87928	0.00398583	0.150401
ENSG00000177990	1203.58	-0.7595	0.263728	-2.87986	0.00397849	0.150401
ENSG00000259528	11.3519	-6.50441	2.25936	-2.87887	0.003991	0.150401
ENSG00000163053	4798.86	-0.715653	0.248638	-2.87829	0.00399832	0.15048
ENSG00000182240	91.1518	-7.24827	2.52018	-2.87609	0.00402634	0.151337
ENSG00000168779	403.415	-1.14067	0.396902	-2.87393	0.00405398	0.151782
ENSG00000250546	16.189	-5.11424	1.7795	-2.87398	0.00405331	0.151782
ENSG00000140718	15972.4	-0.440983	0.153411	-2.87451	0.00404649	0.151782
ENSG00000183765	1704.35	0.808549	0.281461	2.87269	0.00406996	0.152183
ENSG00000120498	4.08643	-20.2913	7.06727	-2.87117	0.00408957	0.15252
ENSG00000167740	4632.92	-0.50913	0.177303	-2.87153	0.00408493	0.15252
ENSG00000123975	5286.88	0.556688	0.193948	2.8703	0.00410085	0.152546
ENSG00000172572	508.209	-1.14498	0.398866	-2.87058	0.00409724	0.152546
ENSG00000174842	3633.46	-0.577729	0.201412	-2.8684	0.00412554	0.152677
ENSG00000223599	14.0625	-6.74221	2.3498	-2.86927	0.00411426	0.152677
ENSG00000181915	991.638	0.733982	0.255817	2.86917	0.00411553	0.152677
ENSG00000090013	3051.46	0.319033	0.111209	2.86876	0.00412083	0.152677
ENSG00000232732	20.7957	-3.2956	1.14959	-2.86675	0.00414707	0.153183
ENSG00000228010	40.1228	2.24659	0.783729	2.86654	0.00414985	0.153183
ENSG00000261373	17.5676	-5.1393	1.79525	-2.86272	0.00420016	0.154842
ENSG00000163492	408.189	-1.36308	0.476439	-2.86098	0.00422333	0.154904
ENSG00000008056	231.99	-1.6018	0.559819	-2.86128	0.0042193	0.154904
ENSG00000257261	648.647	-0.614369	0.214739	-2.861	0.00422303	0.154904
ENSG00000184162	383.442	1.01548	0.354893	2.86138	0.00421795	0.154904
ENSG00000163935	503.547	1.12351	0.392777	2.86043	0.00423062	0.154974
ENSG00000198399	2673.54	0.646375	0.226059	2.85931	0.00424558	0.155325
ENSG00000121769	7819.15	0.454641	0.159088	2.8578	0.00426594	0.155872
ENSG00000144134	1005.93	-0.601441	0.210629	-2.85545	0.00429758	0.156687
ENSG00000232715	4.61674	-7.77298	2.72226	-2.85534	0.00429911	0.156687
ENSG00000249111	58.5424	-3.38055	1.18439	-2.85427	0.00431363	0.156971
ENSG00000100353	10457.6	0.350515	0.122817	2.85396	0.00431781	0.156971
ENSG00000107223	8845.63	0.308561	0.108156	2.85294	0.00433172	0.157279
ENSG00000122641	282.247	3.09325	1.08451	2.85221	0.00434169	0.157442
ENSG00000168421	431.87	5.67233	1.98931	2.85141	0.00435264	0.157531
ENSG00000270344	184.993	-1.88728	0.661919	-2.85123	0.00435507	0.157531
ENSG00000265494	6.97214	-18.5437	6.50617	-2.85017	0.00436958	0.15766
ENSG00000262539	7.93278	-4.99932	1.75401	-2.85023	0.00436872	0.15766
ENSG00000254343	5.81377	6.04346	2.12139	2.84882	0.00438821	0.15813
ENSG00000238169	4.72603	-9.95229	3.49396	-2.84843	0.00439356	0.15813
ENSG00000129038	325.645	0.887853	0.311972	2.84594	0.00442809	0.158976
ENSG00000199509	5.86313	5.18697	1.82248	2.84611	0.00442574	0.158976
ENSG00000205111	24.4698	-4.03932	1.42162	-2.84136	0.00449215	0.15936
ENSG00000290727	22.2076	-4.44891	1.56455	-2.84357	0.00446118	0.15936
ENSG00000152642	6380.91	0.3603	0.126764	2.84229	0.00447909	0.15936
ENSG00000177058	4690.92	0.485629	0.170899	2.84161	0.00448865	0.15936
ENSG00000236627	32.8636	-4.57662	1.60937	-2.84374	0.00445879	0.15936
ENSG00000118432	8404.19	-0.553472	0.19474	-2.84211	0.00448162	0.15936
ENSG00000085511	895.357	-0.877981	0.308894	-2.84234	0.0044784	0.15936
ENSG00000241735	9.08618	-6.91903	2.43527	-2.84118	0.0044947	0.15936
ENSG00000280375	15.1179	4.32271	1.52139	2.84128	0.00449323	0.15936
ENSG00000188878	26.3562	-3.56657	1.25482	-2.8423	0.00447888	0.15936
ENSG00000099840	144.035	-1.80624	0.635814	-2.84083	0.00449959	0.15936
ENSG00000184905	4717.74	-0.479218	0.168739	-2.83999	0.00451142	0.159583
ENSG00000232451	46.7299	3.76058	1.32482	2.83855	0.00453184	0.160019
ENSG00000249853	421.663	-1.25108	0.441008	-2.83686	0.00455601	0.160019
ENSG00000147124	1147.35	0.997032	0.351449	2.83692	0.00455514	0.160019
ENSG00000119242	713.189	-0.806571	0.284306	-2.83698	0.00455419	0.160019
ENSG00000100201	12706.1	0.750921	0.264709	2.83678	0.00455707	0.160019
ENSG00000230233	40.7483	-3.46561	1.2214	-2.83742	0.00454797	0.160019
ENSG00000042813	6.49711	-5.62521	1.98355	-2.83593	0.00456921	0.160056
ENSG00000266402	12.6305	-1.82277	0.642695	-2.83614	0.00456622	0.160056
ENSG00000188386	43.2883	4.82102	1.70043	2.83518	0.00457995	0.160237
ENSG00000224578	371.738	0.436715	0.154123	2.83354	0.00460349	0.160865
ENSG00000285780	61.334	-3.68083	1.29971	-2.83204	0.00462516	0.160956
ENSG00000214389	227.783	0.636077	0.224578	2.83232	0.00462121	0.160956
ENSG00000107829	551.006	-0.942492	0.332686	-2.83298	0.00461169	0.160956
ENSG00000102683	137.163	3.33393	1.17731	2.83182	0.00462842	0.160956
ENSG00000273165	19.2937	-3.91385	1.38277	-2.83045	0.00464825	0.161451
ENSG00000188647	2455.11	0.534654	0.188969	2.82932	0.00466477	0.16183
ENSG00000177822	306.258	3.55339	1.25661	2.82775	0.00468767	0.161845
ENSG00000080572	6.74449	15.7158	5.55581	2.82871	0.00467354	0.161845
ENSG00000137707	89.1026	-5.29874	1.87359	-2.82813	0.00468211	0.161845
ENSG00000122970	4996.31	-0.411308	0.145445	-2.82794	0.00468491	0.161845
ENSG00000270882	21.4983	2.35866	0.835428	2.8233	0.00475324	0.163044
ENSG00000183891	641.192	-0.709973	0.25136	-2.82453	0.00473499	0.163044
ENSG00000144285	2140.42	-1.63231	0.578278	-2.82271	0.00476197	0.163044
ENSG00000243004	125.756	1.44183	0.510755	2.82294	0.00475859	0.163044
ENSG00000148303	16658.1	0.364348	0.129044	2.82345	0.00475092	0.163044
ENSG00000251209	12.7385	-5.77147	2.04375	-2.82396	0.00474348	0.163044
ENSG00000236519	33.5205	2.94438	1.04297	2.82307	0.00475666	0.163044
ENSG00000221983	18068	0.350743	0.124387	2.81977	0.0048058	0.164349
ENSG00000151136	292.767	-1.33017	0.471972	-2.81831	0.00482765	0.164714
ENSG00000278668	90.5546	2.0017	0.710252	2.8183	0.00482791	0.164714
ENSG00000151025	282.552	-1.66169	0.589991	-2.81646	0.00485555	0.165462
ENSG00000254860	350.068	-0.754522	0.268008	-2.8153	0.00487317	0.165866
ENSG00000282876	51.365	-2.92339	1.03854	-2.81491	0.00487909	0.165872
ENSG00000289460	57.0306	-2.44908	0.870966	-2.81191	0.00492485	0.166446
ENSG00000137265	79.9252	-6.03759	2.14606	-2.81333	0.00490312	0.166446
ENSG00000135269	13669.8	0.425166	0.151176	2.81239	0.00491756	0.166446
ENSG00000104381	24724.6	-0.387046	0.137612	-2.81258	0.00491451	0.166446
ENSG00000060749	2708.35	0.761785	0.270908	2.81197	0.00492391	0.166446
ENSG00000172901	36.2403	-5.49981	1.95664	-2.81084	0.00494124	0.166611
ENSG00000183117	221.696	2.01007	0.715403	2.80971	0.00495864	0.166611
ENSG00000276476	48.0799	-6.69935	2.38415	-2.80995	0.00495486	0.166611
ENSG00000197044	1961.06	-0.633536	0.225392	-2.81081	0.00494164	0.166611
ENSG00000234913	17.5658	-4.99447	1.7772	-2.81031	0.00494945	0.166611
ENSG00000271795	13.0895	6.04452	2.15227	2.80844	0.00497816	0.166684
ENSG00000257242	9.25805	-7.27114	2.58845	-2.80907	0.00496851	0.166684
ENSG00000273173	275.525	-0.853986	0.304045	-2.80875	0.0049734	0.166684
ENSG00000116649	430.951	0.929654	0.33154	2.80405	0.00504652	0.167225
ENSG00000278900	23.9585	3.7834	1.34911	2.80437	0.00504155	0.167225
ENSG00000229654	4.57693	-7.83086	2.79071	-2.80604	0.00501544	0.167225
ENSG00000236279	36.0248	-3.41944	1.21891	-2.80534	0.00502641	0.167225
ENSG00000228158	18.1424	-2.64528	0.94289	-2.8055	0.0050238	0.167225
ENSG00000179057	23.1596	-5.03636	1.79549	-2.805	0.00503167	0.167225
ENSG00000196531	24532.4	0.349496	0.124522	2.80671	0.00500509	0.167225
ENSG00000173757	455.48	1.09875	0.391762	2.80464	0.00503734	0.167225
ENSG00000286240	5.22478	9.57398	3.41243	2.80561	0.00502208	0.167225
ENSG00000115718	77.7491	-2.424	0.864749	-2.80313	0.00506097	0.16732
ENSG00000137818	40018	0.301265	0.107464	2.80341	0.00505648	0.16732
ENSG00000286509	9.01371	-4.91367	1.75326	-2.80258	0.00506954	0.167411
ENSG00000158246	129.733	3.60673	1.28747	2.8014	0.0050882	0.167835
ENSG00000166341	15.1989	-3.32688	1.1878	-2.80089	0.00509623	0.167908
ENSG00000127022	84691.8	-0.227232	0.0811438	-2.80035	0.00510464	0.167993
ENSG00000217862	5.03728	7.84272	2.80262	2.79835	0.00513646	0.168847
ENSG00000095539	116.064	-1.61109	0.575887	-2.79757	0.00514884	0.168869
ENSG00000267939	35.4626	1.5526	0.554974	2.79761	0.00514816	0.168869
ENSG00000274225	13.6381	5.6276	2.01198	2.79704	0.00515725	0.168953
ENSG00000204603	39.1556	3.60396	1.28939	2.79509	0.00518854	0.169785
ENSG00000224228	5.00486	6.41176	2.29454	2.79435	0.00520035	0.169786
ENSG00000124143	44.2057	6.13045	2.19371	2.79457	0.00519695	0.169786
ENSG00000272106	146.175	-1.89832	0.679686	-2.79293	0.00522323	0.17034
ENSG00000136002	5.42447	-5.98973	2.14502	-2.79239	0.00523197	0.170432
ENSG00000105939	5887.39	0.605484	0.216936	2.79107	0.00525344	0.170938
ENSG00000252620	5.94622	5.64319	2.02245	2.79028	0.0052663	0.171164
ENSG00000172974	236.539	0.658828	0.236231	2.78891	0.00528855	0.17142
ENSG00000113013	27870.7	0.277802	0.0996081	2.78895	0.00528789	0.17142
ENSG00000231892	48.2761	-2.39517	0.858886	-2.7887	0.00529201	0.17142
ENSG00000149735	42.2766	-5.42639	1.94617	-2.78824	0.00529949	0.171469
ENSG00000135245	2072.52	0.437852	0.157079	2.78746	0.00531234	0.1715
ENSG00000288704	5.24452	6.58611	2.36254	2.78773	0.00530795	0.1715
ENSG00000170561	700.859	0.808787	0.290422	2.78487	0.00535493	0.172489
ENSG00000164932	1453.17	0.552941	0.198552	2.78487	0.00535493	0.172489
ENSG00000196646	1429.57	-0.863992	0.310289	-2.78447	0.00536152	0.172508
ENSG00000135862	2495.6	0.913056	0.328147	2.78246	0.00539485	0.172533
ENSG00000202344	9.8573	-4.25461	1.52889	-2.7828	0.00538916	0.172533
ENSG00000236859	860.281	-0.538372	0.193437	-2.78319	0.00538277	0.172533
ENSG00000017260	11862.6	-0.479727	0.172446	-2.7819	0.00540419	0.172533
ENSG00000156920	124.133	-4.47219	1.60743	-2.7822	0.00539922	0.172533
ENSG00000173432	5.17073	6.04492	2.17129	2.78402	0.005369	0.172533
ENSG00000182871	40.2197	-2.54547	0.914941	-2.78212	0.00540054	0.172533
ENSG00000239636	19.4505	-2.36288	0.849987	-2.7799	0.0054376	0.173278
ENSG00000290696	12.6905	-4.98392	1.79292	-2.77978	0.00543954	0.173278
ENSG00000205542	428892	0.410386	0.147684	2.7788	0.00545599	0.17361
ENSG00000236021	74.3192	-2.25624	0.812651	-2.7764	0.0054965	0.174417
ENSG00000178104	5391.59	-0.484053	0.174357	-2.77622	0.00549951	0.174417
ENSG00000164904	28003.1	0.271437	0.0977636	2.77646	0.00549539	0.174417
ENSG00000287467	17.2356	3.60003	1.29728	2.77505	0.00551926	0.174851
ENSG00000119929	3715.8	0.415706	0.149934	2.7726	0.00556109	0.175796
ENSG00000130164	2399.37	0.828669	0.298879	2.77259	0.00556129	0.175796
ENSG00000287784	50.5814	-5.17273	1.86617	-2.77185	0.00557393	0.176003
ENSG00000174917	4231.58	0.372251	0.13434	2.77096	0.00558908	0.176288
ENSG00000180376	2978.49	0.683128	0.246849	2.7674	0.00565061	0.177191
ENSG00000150471	3350.55	-0.571482	0.206536	-2.76699	0.00565769	0.177191
ENSG00000205838	316.262	1.11329	0.402207	2.76795	0.00564105	0.177191
ENSG00000285579	26.2276	-4.28011	1.54593	-2.76862	0.00562935	0.177191
ENSG00000189136	19.8318	2.48944	0.899473	2.76767	0.00564584	0.177191
ENSG00000006210	11.2323	6.19797	2.23914	2.76802	0.00563983	0.177191
ENSG00000274333	12.5919	-2.03358	0.734989	-2.76681	0.00566072	0.177191
ENSG00000157703	329.971	1.49124	0.539065	2.76634	0.00566893	0.177256
ENSG00000118217	7189.66	-0.422241	0.152664	-2.76581	0.0056781	0.17735
ENSG00000289083	19.0524	3.44365	1.24545	2.76497	0.00569277	0.177616
ENSG00000164619	597.072	-1.12517	0.40706	-2.76414	0.00570735	0.177686
ENSG00000257345	19.337	5.55471	2.00956	2.76414	0.00570731	0.177686
ENSG00000170779	1956.14	-2.10281	0.76101	-2.76318	0.00572418	0.177826
ENSG00000133020	343.859	-1.60414	0.580504	-2.76335	0.00572114	0.177826
ENSG00000232558	4.34236	-6.19977	2.24463	-2.76205	0.00574402	0.1781
ENSG00000143643	2079.56	-1.01087	0.365996	-2.76197	0.00574536	0.1781
ENSG00000188994	21397.2	0.566317	0.205422	2.75685	0.00583608	0.180331
ENSG00000176884	17.073	4.21919	1.53035	2.75701	0.0058333	0.180331
ENSG00000269151	15.9959	4.46274	1.61857	2.75721	0.00582963	0.180331
ENSG00000184634	291.503	1.4736	0.534659	2.75615	0.00584864	0.180525
ENSG00000196507	2705.8	-0.366647	0.133129	-2.75407	0.00588596	0.181392
ENSG00000231104	30.6254	-4.03475	1.46512	-2.75388	0.0058893	0.181392
ENSG00000287839	42.951	2.26928	0.824366	2.75276	0.00590949	0.181432
ENSG00000181195	2363.77	0.581662	0.211287	2.75294	0.0059062	0.181432
ENSG00000101670	661.126	1.21883	0.442743	2.75291	0.00590676	0.181432
ENSG00000150457	555.639	0.91506	0.332489	2.75215	0.00592058	0.181579
ENSG00000219395	17.9276	2.70966	0.984985	2.75097	0.00594199	0.182042
ENSG00000274642	272.305	-0.880102	0.320006	-2.75026	0.00595471	0.182238
ENSG00000255496	69.8566	-1.79367	0.652338	-2.7496	0.00596678	0.182414
ENSG00000291214	960.083	0.488722	0.177766	2.74924	0.00597343	0.182424
ENSG00000140092	329.448	-5.83386	2.12277	-2.74823	0.00599187	0.182793
ENSG00000150782	89.9393	-5.4529	1.98524	-2.74672	0.00601946	0.183247
ENSG00000267144	30.7387	-4.46599	1.62593	-2.74673	0.00601934	0.183247
ENSG00000110002	5837.13	-0.626331	0.22819	-2.74478	0.00605506	0.184137
ENSG00000166923	538.635	3.86137	1.40722	2.74397	0.00607013	0.1844
ENSG00000229348	14.301	-5.30772	1.93525	-2.74265	0.00609462	0.184949
ENSG00000179528	25.0441	6.47142	2.36265	2.73906	0.00616157	0.186468
ENSG00000037280	13.4841	-5.48292	2.00185	-2.73892	0.00616408	0.186468
ENSG00000182256	363.617	-1.40475	0.512785	-2.73945	0.00615416	0.186468
ENSG00000120656	4788.55	0.448789	0.16389	2.73836	0.00617472	0.186594
ENSG00000196296	31.9021	-5.09837	1.8621	-2.73796	0.00618207	0.186621
ENSG00000287200	37.8991	3.56073	1.30215	2.7345	0.00624758	0.188204
ENSG00000102743	286.289	0.952212	0.348214	2.73456	0.00624633	0.188204
ENSG00000063177	19206.5	0.382579	0.13998	2.7331	0.0062742	0.188809
ENSG00000162882	160.29	-4.10204	1.50112	-2.73266	0.00628251	0.188862
ENSG00000171497	3836.95	0.380327	0.139222	2.7318	0.00629901	0.189101
ENSG00000105643	7.89874	-7.01327	2.5675	-2.73156	0.00630357	0.189101
ENSG00000270207	77.1118	-3.8697	1.41713	-2.73066	0.00632082	0.189421
ENSG00000253171	3.56659	-5.23855	1.91923	-2.72951	0.00634287	0.189884
ENSG00000263232	11.965	-3.0735	1.1267	-2.72789	0.00637417	0.190623
ENSG00000286746	124.558	-3.10609	1.13926	-2.72642	0.00640259	0.191275
ENSG00000139629	41.6201	-4.66564	1.71153	-2.72601	0.00641059	0.191316
ENSG00000102908	2023.13	0.683293	0.250742	2.72509	0.00642839	0.191648
ENSG00000160883	6.52642	-6.81445	2.50104	-2.72465	0.00643701	0.191707
ENSG00000144476	12.1019	4.20001	1.54174	2.72421	0.00644563	0.191766
ENSG00000198825	3558.22	0.587793	0.215813	2.72363	0.00645691	0.191903
ENSG00000100433	818.141	-1.19177	0.437781	-2.7223	0.00648283	0.192475
ENSG00000145386	4495.99	1.66046	0.610034	2.72192	0.00649035	0.1925
ENSG00000165821	482.644	-0.851559	0.313129	-2.71951	0.00653781	0.193709
ENSG00000275496	28.2697	-1.56184	0.574503	-2.71859	0.00655602	0.194049
ENSG00000226535	266.064	1.86398	0.685758	2.71813	0.00656526	0.194123
ENSG00000197358	35.7489	0.949688	0.349471	2.7175	0.00657763	0.194289
ENSG00000187840	8902.5	0.507378	0.186745	2.71695	0.00658856	0.194413
ENSG00000233621	171.974	1.70996	0.629908	2.71462	0.0066352	0.194874
ENSG00000105983	1859.27	-0.712059	0.262414	-2.7135	0.0066577	0.194874
ENSG00000289053	16.102	5.67632	2.09037	2.71546	0.00661833	0.194874
ENSG00000229083	6.84166	2.22855	0.821291	2.71347	0.00665827	0.194874
ENSG00000254951	502.494	-4.26374	1.57039	-2.71508	0.00662601	0.194874
ENSG00000257449	7.52057	-5.01734	1.84754	-2.71568	0.00661389	0.194874
ENSG00000103160	12443.2	-0.392692	0.144716	-2.71353	0.00665697	0.194874
ENSG00000172296	1035.79	5.74686	2.11715	2.71443	0.00663899	0.194874
ENSG00000071082	34251.8	0.343124	0.126519	2.71203	0.00668722	0.19493
ENSG00000283341	93.1102	2.53859	0.935784	2.7128	0.00667182	0.19493
ENSG00000253771	14.1977	2.07493	0.765079	2.71205	0.00668681	0.19493
ENSG00000224055	7.39499	9.0885	3.35055	2.71254	0.0066769	0.19493
ENSG00000089220	43906.5	-0.181547	0.0669836	-2.71032	0.00672177	0.195739
ENSG00000143669	4480.4	-0.678181	0.25029	-2.70958	0.00673691	0.195982
ENSG00000229891	549.604	-0.914598	0.337597	-2.70914	0.00674574	0.196041
ENSG00000231405	5.97568	5.94582	2.19542	2.70829	0.00676314	0.196349
ENSG00000285884	74.5684	-2.15496	0.796172	-2.70665	0.00679663	0.196963
ENSG00000226761	7.26223	-5.87815	2.1718	-2.70658	0.00679796	0.196963
ENSG00000276170	812.106	0.904025	0.334102	2.70583	0.0068133	0.197209
ENSG00000050165	9995.52	-0.813571	0.300786	-2.70482	0.00683414	0.197614
ENSG00000152684	5086.74	-0.546357	0.202253	-2.70136	0.00690567	0.199446
ENSG00000286632	35.0761	-5.62469	2.08238	-2.70109	0.00691132	0.199446
ENSG00000118971	11274.6	0.592731	0.219495	2.70043	0.0069249	0.199638
ENSG00000079150	4995.18	-0.628879	0.232976	-2.69933	0.0069479	0.200101
ENSG00000230269	856.243	0.719739	0.266707	2.69862	0.0069628	0.20033
ENSG00000203857	38.0839	7.42888	2.75442	2.69707	0.00699523	0.200353
ENSG00000249338	122.073	-3.3969	1.25955	-2.69692	0.00699835	0.200353
ENSG00000060762	7815.32	0.389387	0.144367	2.6972	0.00699259	0.200353
ENSG00000068831	1185.32	-1.09385	0.405585	-2.69697	0.00699737	0.200353
ENSG00000263011	11.9691	-2.53546	0.939933	-2.69749	0.00698646	0.200353
ENSG00000082805	3883.75	-0.60448	0.224194	-2.69624	0.00701269	0.200564
ENSG00000117519	49001	0.306622	0.113766	2.6952	0.0070347	0.200676
ENSG00000196911	8694.24	0.557999	0.207045	2.69507	0.00703746	0.200676
ENSG00000291027	58.3902	1.28018	0.474982	2.69521	0.00703448	0.200676
ENSG00000213046	33.5313	-6.35382	2.35845	-2.69407	0.00705864	0.200882
ENSG00000144847	115.492	-3.14422	1.16707	-2.69412	0.00705746	0.200882
ENSG00000227403	224.451	-1.24118	0.460825	-2.69339	0.00707287	0.201088
ENSG00000213889	145.814	1.45035	0.539233	2.68966	0.00715251	0.203152
ENSG00000286482	8.16066	10.2093	3.7987	2.68758	0.00719714	0.204219
ENSG00000280061	252.699	-2.46502	0.917652	-2.68622	0.00722645	0.204849
ENSG00000163814	1509.42	-4.95955	1.84694	-2.68527	0.00724708	0.20503
ENSG00000065621	601.946	0.735031	0.273702	2.68552	0.00724175	0.20503
ENSG00000279074	4.01586	-10.0815	3.75565	-2.68436	0.00726699	0.205392
ENSG00000088387	2381.62	1.158	0.431476	2.6838	0.00727905	0.205532
ENSG00000289441	9.27531	-7.37086	2.7477	-2.68255	0.00730622	0.206097
ENSG00000270098	13.219	-5.76387	2.14949	-2.68151	0.00732915	0.20645
ENSG00000263938	10.892	4.10798	1.53207	2.68133	0.00733308	0.20645
ENSG00000172817	439.652	-1.73415	0.646896	-2.68073	0.00734619	0.206618
ENSG00000199933	6.32125	-4.69029	1.75006	-2.68008	0.00736051	0.206819
ENSG00000227051	8893.17	-0.931412	0.347632	-2.6793	0.00737759	0.207046
ENSG00000288770	82.6367	-1.41967	0.529913	-2.67906	0.00738295	0.207046
ENSG00000213058	2803.83	0.387246	0.144583	2.67837	0.0073982	0.207071
ENSG00000064652	2174.56	0.653296	0.2439	2.67854	0.00739446	0.207071
ENSG00000259663	4248.65	-0.489025	0.182613	-2.67794	0.0074077	0.207089
ENSG00000198832	3019.18	-0.435482	0.162633	-2.67769	0.00741322	0.207089
ENSG00000117360	2822.56	-0.39648	0.148116	-2.67682	0.00743244	0.207224
ENSG00000291005	37.2591	1.34841	0.503696	2.67703	0.0074279	0.207224
ENSG00000285940	24.364	-3.88013	1.44993	-2.67609	0.0074487	0.207477
ENSG00000279267	179.694	-1.33334	0.498426	-2.67509	0.00747086	0.207593
ENSG00000290803	118.93	-2.36651	0.884837	-2.67451	0.00748383	0.207593
ENSG00000258117	21.6055	-2.67707	1.00064	-2.67536	0.00746498	0.207593
ENSG00000134532	1207.26	-0.795835	0.297588	-2.67429	0.00748886	0.207593
ENSG00000123154	503.778	-0.508389	0.190072	-2.67472	0.00747915	0.207593
ENSG00000198034	47499.6	0.278751	0.104252	2.67382	0.00749933	0.207683
ENSG00000233340	31.6448	-1.89464	0.708808	-2.67299	0.00751781	0.207995
ENSG00000107130	2247.12	-0.527922	0.197531	-2.6726	0.0075265	0.208036
ENSG00000231704	6.02981	-4.90267	1.83595	-2.67037	0.00757682	0.208826
ENSG00000150893	1983.14	-5.09919	1.9094	-2.67057	0.00757224	0.208826
ENSG00000259165	13.2695	-9.73275	3.64428	-2.67069	0.00756944	0.208826
ENSG00000227708	4.07064	-7.45006	2.79026	-2.67003	0.00758454	0.208839
ENSG00000187193	276.589	-0.556151	0.20833	-2.66956	0.00759503	0.208928
ENSG00000138061	493.721	5.26495	1.9731	2.66837	0.00762204	0.209472
ENSG00000254139	44.1907	-3.60991	1.3534	-2.66728	0.00764672	0.20995
ENSG00000286106	9.00823	6.69916	2.51205	2.66681	0.00765754	0.210004
ENSG00000255893	9.93025	-4.60638	1.72746	-2.66656	0.00766327	0.210004
ENSG00000271618	21.242	-4.61058	1.72994	-2.66516	0.00769511	0.210477
ENSG00000247498	113.471	1.19134	0.446976	2.66533	0.00769139	0.210477
ENSG00000229533	14.1519	-6.03993	2.26804	-2.66306	0.00774328	0.211548
ENSG00000165152	7599.28	-0.577465	0.216863	-2.66282	0.00774896	0.211548
ENSG00000260876	4.67414	-12.0262	4.51797	-2.66186	0.00777101	0.211949
ENSG00000255240	246.895	1.34095	0.503862	2.66134	0.00778313	0.212079
ENSG00000170445	19485.6	-0.316972	0.11912	-2.66095	0.00779204	0.212121
ENSG00000231527	197.36	-0.901101	0.338704	-2.66044	0.00780394	0.212245
ENSG00000214022	354.219	0.962743	0.361974	2.65971	0.00782089	0.212346
ENSG00000273597	8.96868	-6.31547	2.37484	-2.65932	0.00782976	0.212346
ENSG00000186417	76.5682	3.20155	1.20376	2.65963	0.0078227	0.212346
ENSG00000164815	4237.08	-0.402939	0.1516	-2.65791	0.00786272	0.21304
ENSG00000265702	27.3633	-4.21829	1.58728	-2.65755	0.007871	0.213064
ENSG00000042317	2264.68	-0.448355	0.168769	-2.65662	0.00789284	0.213455
ENSG00000260372	53.9133	-2.23663	0.842239	-2.65558	0.00791731	0.213916
ENSG00000286071	29.2143	4.16837	1.57026	2.65457	0.00794097	0.213945
ENSG00000246859	1865.54	-0.733915	0.27643	-2.65497	0.00793145	0.213945
ENSG00000226070	24.5374	4.89394	1.84349	2.65472	0.00793749	0.213945
ENSG00000187079	2186.78	0.910694	0.343106	2.65427	0.00794809	0.213945
ENSG00000128607	2551.89	0.512169	0.193046	2.65309	0.00797597	0.214096
ENSG00000273399	9.0676	-6.0271	2.27147	-2.65339	0.00796878	0.214096
ENSG00000171723	3503.62	-0.697828	0.263021	-2.65313	0.00797486	0.214096
ENSG00000265190	70.7888	4.95119	1.86703	2.65191	0.00800383	0.214644
ENSG00000249484	26.7056	6.55059	2.47074	2.65127	0.00801907	0.214853
ENSG00000230804	10.7429	-4.72714	1.78382	-2.65	0.00804915	0.215304
ENSG00000260793	60.0575	-2.44935	0.924306	-2.64993	0.00805086	0.215304
ENSG00000140830	1221.88	-0.5125	0.193503	-2.64854	0.00808413	0.215994
ENSG00000164587	80617.7	0.323918	0.122328	2.64793	0.00809852	0.216178
ENSG00000106537	19028.7	0.198245	0.0748857	2.64731	0.0081136	0.21638
ENSG00000228215	10.8998	8.17343	3.08819	2.64667	0.00812881	0.216386
ENSG00000229944	193.355	0.612725	0.231497	2.64679	0.00812596	0.216386
ENSG00000129194	1627.91	1.01974	0.385508	2.6452	0.00816436	0.217131
ENSG00000164294	2170.31	3.94723	1.4925	2.6447	0.00817629	0.217248
ENSG00000225792	159.754	-1.0316	0.390334	-2.64288	0.00822053	0.217752
ENSG00000173465	1866.08	0.450303	0.170381	2.64292	0.00821947	0.217752
ENSG00000128482	34.3364	-3.87726	1.46718	-2.64267	0.00822545	0.217752
ENSG00000160185	22.8991	-3.89164	1.47255	-2.64279	0.00822269	0.217752
ENSG00000231203	15.3581	-4.62192	1.75	-2.64109	0.00826392	0.218459
ENSG00000123119	4966.71	0.916657	0.347093	2.64095	0.00826732	0.218459
ENSG00000289347	34.0713	-4.1892	1.58674	-2.64012	0.00828759	0.218794
ENSG00000172965	1500.2	0.402014	0.152289	2.6398	0.00829546	0.218801
ENSG00000149218	3117.62	0.518233	0.196372	2.63903	0.00831426	0.219097
ENSG00000201554	31.5369	2.52361	0.95656	2.63821	0.00833448	0.219249
ENSG00000248185	3.87169	8.89224	3.37114	2.63775	0.00834576	0.219249
ENSG00000291136	1071.05	0.436133	0.165374	2.63725	0.00835806	0.219249
ENSG00000184216	634.709	0.733799	0.278197	2.63769	0.00834725	0.219249
ENSG00000101558	48104.3	0.327261	0.124081	2.63747	0.00835268	0.219249
ENSG00000290700	22.6844	-3.59003	1.36163	-2.63658	0.00837472	0.219319
ENSG00000196177	2596.41	-0.767514	0.291142	-2.63622	0.00838354	0.219319
ENSG00000265713	143.761	1.87541	0.711359	2.63637	0.00837978	0.219319
ENSG00000251391	5.17523	-7.20452	2.73387	-2.63529	0.0084066	0.219723
ENSG00000215845	5889.61	0.408485	0.155088	2.63388	0.00844148	0.219837
ENSG00000248206	48.2618	-3.09342	1.1741	-2.63471	0.0084209	0.219837
ENSG00000258815	12.1004	-5.24641	1.99181	-2.63399	0.0084387	0.219837
ENSG00000173812	37359.6	0.206679	0.0784586	2.63424	0.00843254	0.219837
ENSG00000197632	157.749	1.76286	0.669508	2.63307	0.00846178	0.220167
ENSG00000223764	81.8544	-1.56309	0.593804	-2.63234	0.00847989	0.220439
ENSG00000205632	9.01218	-6.49667	2.47011	-2.63012	0.00853557	0.221687
ENSG00000170873	1789.02	-0.611565	0.232595	-2.62932	0.00855571	0.222009
ENSG00000124831	8873.31	0.627415	0.238691	2.62857	0.00857449	0.222297
ENSG00000140650	783.299	-0.817132	0.310945	-2.6279	0.00859145	0.222536
ENSG00000096746	11191.3	0.304853	0.116066	2.62655	0.00862564	0.223221
ENSG00000254985	4.84662	6.2656	2.38648	2.62546	0.0086533	0.223698
ENSG00000262155	109.151	1.63172	0.621559	2.62521	0.00865958	0.223698
ENSG00000150753	35487.6	0.216326	0.0824135	2.62489	0.00866769	0.223707
ENSG00000281021	38.3959	1.9006	0.72424	2.62426	0.00868366	0.223719
ENSG00000167635	11374.5	0.509363	0.194092	2.62434	0.00868169	0.223719
ENSG00000126067	16318.5	0.258312	0.0984518	2.62374	0.00869693	0.223861
ENSG00000236423	21.3803	-3.74442	1.42774	-2.62262	0.00872572	0.224401
ENSG00000120324	245.966	-1.8397	0.70193	-2.62092	0.00876918	0.225318
ENSG00000143947	28505.5	0.290112	0.11077	2.61905	0.00881751	0.226158
ENSG00000280078	27.1452	5.24665	2.0035	2.61874	0.00882539	0.226158
ENSG00000156968	495.564	0.959072	0.366203	2.61896	0.00881975	0.226158
ENSG00000147535	2239.62	-0.51004	0.19482	-2.61801	0.0088445	0.226273
ENSG00000203279	391.519	-0.768991	0.293825	-2.61717	0.00886609	0.226273
ENSG00000285517	285.252	1.7071	0.652225	2.61735	0.00886165	0.226273
ENSG00000166938	4169.23	-0.562084	0.214739	-2.61752	0.00885723	0.226273
ENSG00000266973	5.52681	-5.73883	2.19286	-2.61706	0.00886914	0.226273
ENSG00000119953	3342.38	0.442389	0.169118	2.61586	0.00890034	0.226868
ENSG00000206684	10.8107	-3.78152	1.44604	-2.61509	0.00892033	0.226902
ENSG00000144713	32898.9	0.332995	0.127374	2.6143	0.00894101	0.226902
ENSG00000169297	36.4358	5.06114	1.93571	2.61462	0.00893278	0.226902
ENSG00000100842	40.228	5.56246	2.12713	2.61501	0.00892246	0.226902
ENSG00000287879	5.35891	7.16389	2.73999	2.61457	0.00893392	0.226902
ENSG00000168243	5938.35	-0.390297	0.149445	-2.61165	0.00901073	0.226948
ENSG00000241563	16.3117	-2.92893	1.12214	-2.61014	0.00905064	0.226948
ENSG00000228474	10420.7	0.397135	0.152157	2.61005	0.00905303	0.226948
ENSG00000130508	9647.4	0.652306	0.249797	2.61135	0.00901853	0.226948
ENSG00000226709	48.1671	-1.68539	0.644946	-2.61322	0.00896941	0.226948
ENSG00000287348	4.53816	7.94348	3.04238	2.61094	0.00902939	0.226948
ENSG00000075914	5130.89	0.590784	0.226346	2.61009	0.00905179	0.226948
ENSG00000218582	6.6968	-3.22072	1.23368	-2.61067	0.00903643	0.226948
ENSG00000166900	2439.73	0.49243	0.188522	2.61205	0.00900002	0.226948
ENSG00000166863	1405.97	-1.53856	0.588733	-2.61334	0.00896613	0.226948
ENSG00000151413	2310.81	-0.448527	0.171761	-2.61134	0.00901887	0.226948
ENSG00000140945	1708.21	-0.771961	0.295683	-2.61078	0.00903372	0.226948
ENSG00000236618	79.4773	0.793121	0.303841	2.61032	0.00904584	0.226948
ENSG00000198840	4485.04	0.469575	0.179878	2.61052	0.00904038	0.226948
ENSG00000250596	25.8807	5.5733	2.13602	2.6092	0.00907548	0.227115
ENSG00000182583	17.016	3.19851	1.2258	2.60933	0.00907192	0.227115
ENSG00000280257	10.987	-11.1796	4.2861	-2.60834	0.00909837	0.227205
ENSG00000224855	9.74615	3.11389	1.19383	2.60832	0.0090987	0.227205
ENSG00000070190	73.56	-5.98584	2.29581	-2.60728	0.00912634	0.227205
ENSG00000101966	2497.6	0.380481	0.145912	2.60761	0.00911775	0.227205
ENSG00000289303	6.7991	-6.31435	2.42167	-2.60744	0.00912225	0.227205
ENSG00000126217	996.53	-0.51888	0.198989	-2.60758	0.00911856	0.227205
ENSG00000163082	72.5478	-1.78669	0.685832	-2.60515	0.00918351	0.228038
ENSG00000123268	1779.68	0.591666	0.227087	2.60546	0.00917517	0.228038
ENSG00000176953	670.711	0.783586	0.300762	2.60533	0.00917849	0.228038
ENSG00000148840	187.315	1.27422	0.489195	2.60473	0.00919478	0.228121
ENSG00000290075	6.93071	-5.31198	2.04003	-2.60388	0.00921754	0.228489
ENSG00000173085	733.697	-0.834667	0.320732	-2.60238	0.00925792	0.229277
ENSG00000271086	7.62907	6.71938	2.58281	2.60158	0.00927963	0.229277
ENSG00000247011	14.9333	-5.4213	2.08364	-2.60184	0.00927241	0.229277
ENSG00000167759	34.2887	5.632	2.16489	2.60152	0.00928114	0.229277
ENSG00000185946	2595.15	0.559683	0.215274	2.59987	0.00932596	0.229534
ENSG00000248307	68.9197	2.60205	1.0023	2.59607	0.00942965	0.229534
ENSG00000113070	1140.52	-0.644523	0.248103	-2.5978	0.00938228	0.229534
ENSG00000145868	5163.32	-0.481102	0.185289	-2.5965	0.0094179	0.229534
ENSG00000120705	13387.3	0.325256	0.12521	2.59769	0.00938535	0.229534
ENSG00000074935	3663.4	0.5041	0.193977	2.59876	0.00935614	0.229534
ENSG00000156482	5833.72	0.317461	0.122236	2.59712	0.00940084	0.229534
ENSG00000290357	18.5264	-2.6835	1.03193	-2.60046	0.00930983	0.229534
ENSG00000147869	22.0334	-5.08657	1.95887	-2.59668	0.00941289	0.229534
ENSG00000149418	345.864	-4.9741	1.91422	-2.59849	0.00936336	0.229534
ENSG00000136149	119.348	0.647528	0.249246	2.59795	0.00937831	0.229534
ENSG00000092203	12032.6	-0.230209	0.0886471	-2.59691	0.00940656	0.229534
ENSG00000185088	34354.4	0.464206	0.178501	2.60058	0.00930661	0.229534
ENSG00000076344	24.0851	3.80016	1.46392	2.59588	0.00943489	0.229534
ENSG00000128791	6844.26	-0.578607	0.222888	-2.59595	0.00943289	0.229534
ENSG00000171858	7017.38	0.435481	0.167675	2.59718	0.0093994	0.229534
ENSG00000099804	130.012	-1.38104	0.531166	-2.60002	0.00932181	0.229534
ENSG00000088247	892.16	0.412642	0.158808	2.59837	0.00936674	0.229534
ENSG00000072571	1891.95	0.984727	0.379391	2.59555	0.00944403	0.229563
ENSG00000234899	22.0007	-4.51568	1.74024	-2.59486	0.00946307	0.229832
ENSG00000237923	10.0768	7.20509	2.77775	2.59386	0.00949053	0.230305
ENSG00000229750	12.0126	-3.13497	1.20923	-2.59254	0.00952707	0.230787
ENSG00000167306	447.299	-1.29418	0.499246	-2.59227	0.00953442	0.230787
ENSG00000235123	5.69796	14.1434	5.45506	2.59272	0.00952199	0.230787
ENSG00000266947	311.626	-1.40034	0.540464	-2.591	0.00956965	0.231446
ENSG00000105556	35.8643	2.58932	0.999541	2.59051	0.00958335	0.231583
ENSG00000225580	3.8455	2.88734	1.11568	2.58796	0.0096545	0.232912
ENSG00000056558	16.7714	-6.24508	2.41307	-2.58802	0.00965296	0.232912
ENSG00000187653	1332.1	0.435207	0.168207	2.58733	0.00967217	0.232948
ENSG00000260273	42.2676	-3.00633	1.16194	-2.58733	0.00967218	0.232948
ENSG00000054793	3968.31	-0.441352	0.17082	-2.58372	0.00977409	0.235177
ENSG00000101335	12565.3	1.16831	0.452223	2.58348	0.00978103	0.235177
ENSG00000143248	42463.8	-0.732461	0.283549	-2.58319	0.00978921	0.235178
ENSG00000226091	9.73702	-3.48023	1.34794	-2.5819	0.00982594	0.235864
ENSG00000207654	12.6312	-3.97888	1.54127	-2.58155	0.00983564	0.2359
ENSG00000171757	219.079	-1.34728	0.522134	-2.58033	0.0098706	0.235934
ENSG00000164442	1364.37	0.646502	0.250529	2.58054	0.00986455	0.235934
ENSG00000077782	1959.63	0.658815	0.255339	2.58015	0.0098756	0.235934
ENSG00000206579	4591.59	-0.725285	0.281089	-2.58027	0.00987243	0.235934
ENSG00000267750	161.627	-1.54503	0.598833	-2.58007	0.00987799	0.235934
ENSG00000285586	29.3669	-5.69992	2.20975	-2.57944	0.00989606	0.23617
ENSG00000222041	2068.98	0.427557	0.165826	2.57834	0.00992749	0.236724
ENSG00000242607	65.2182	2.22827	0.864459	2.57764	0.00994773	0.237011
ENSG00000258017	62.4837	-1.53147	0.594276	-2.57704	0.00996518	0.237231
ENSG00000138495	7347.05	0.659473	0.25596	2.57647	0.00998151	0.237423
ENSG00000234377	480.373	1.76666	0.686033	2.57519	0.0100186	0.23811
ENSG00000246084	19.8443	-6.40091	2.48774	-2.57298	0.0100827	0.239436
ENSG00000185414	2904.81	-0.434904	0.169114	-2.57166	0.0101212	0.240053
ENSG00000146006	1168.77	-0.868278	0.337658	-2.57147	0.0101267	0.240053
ENSG00000185869	113.913	1.55959	0.606553	2.57123	0.0101337	0.240053
ENSG00000257511	81.5079	-1.31467	0.511467	-2.57039	0.0101584	0.240441
ENSG00000250303	3207.76	0.742204	0.288847	2.56954	0.0101834	0.240834
ENSG00000168275	3083.89	0.498177	0.19396	2.56845	0.0102154	0.241029
ENSG00000163682	44581	0.365675	0.142374	2.56841	0.0102167	0.241029
ENSG00000185130	5.8012	7.18583	2.79738	2.56878	0.0102059	0.241029
ENSG00000213609	15.4215	1.61839	0.630219	2.56799	0.0102291	0.241125
ENSG00000106003	19.6838	4.98701	1.94266	2.56711	0.0102551	0.24154
ENSG00000163762	54.0454	5.42567	2.11379	2.5668	0.0102641	0.241555
ENSG00000262061	10.2766	5.66254	2.20736	2.5653	0.0103088	0.242408
ENSG00000288573	36.8305	2.92684	1.14239	2.56203	0.0104062	0.242592
ENSG00000215861	33.9074	-1.27422	0.497144	-2.56307	0.0103751	0.242592
ENSG00000251303	36.0612	5.92448	2.31113	2.56346	0.0103636	0.242592
ENSG00000197061	12005	0.781097	0.304674	2.56371	0.010356	0.242592
ENSG00000227053	54.8227	1.29967	0.507135	2.56276	0.0103843	0.242592
ENSG00000154328	2610.48	-0.481591	0.18798	-2.56193	0.0104092	0.242592
ENSG00000257398	40.9809	-4.67768	1.82481	-2.56337	0.0103661	0.242592
ENSG00000132972	18.2801	5.85226	2.28218	2.56433	0.0103374	0.242592
ENSG00000100926	381.75	-0.614097	0.239444	-2.56468	0.0103272	0.242592
ENSG00000259710	5.52719	6.26237	2.44438	2.56194	0.0104089	0.242592
ENSG00000108107	8785.86	0.297885	0.116257	2.56229	0.0103985	0.242592
ENSG00000196912	5226.86	0.593423	0.231799	2.56007	0.0104651	0.243697
ENSG00000291048	21.7674	4.29007	1.67669	2.55865	0.010508	0.244085
ENSG00000137642	1236.49	0.681967	0.266505	2.55893	0.0104996	0.244085
ENSG00000280118	21.4824	-6.03607	2.35932	-2.5584	0.0105156	0.244085
ENSG00000109103	789.41	-1.4328	0.559898	-2.55904	0.0104963	0.244085
ENSG00000232346	33.6687	1.26883	0.496055	2.55784	0.0105326	0.244283
ENSG00000231628	7.25426	-6.63243	2.59327	-2.55755	0.0105411	0.244284
ENSG00000271727	50.5203	-1.99454	0.780038	-2.55698	0.0105585	0.24449
ENSG00000170759	30050.5	0.352965	0.138066	2.5565	0.0105731	0.244631
ENSG00000138442	6819.22	0.475821	0.186228	2.55505	0.0106173	0.245038
ENSG00000035720	4.6729	-8.64438	3.38357	-2.55481	0.0106246	0.245038
ENSG00000284196	15.2283	-6.74418	2.63899	-2.55559	0.0106007	0.245038
ENSG00000268573	123.533	-1.87042	0.731967	-2.55534	0.0106085	0.245038
ENSG00000134769	8130.91	-0.413853	0.162077	-2.55344	0.0106666	0.245809
ENSG00000289736	3.54485	-5.31193	2.08131	-2.5522	0.0107045	0.246464
ENSG00000165943	11576.6	-0.466687	0.182882	-2.55185	0.0107151	0.246464
ENSG00000092140	5295.98	0.543591	0.21305	2.55147	0.0107268	0.246464
ENSG00000197020	887.727	-1.06668	0.418078	-2.5514	0.0107292	0.246464
ENSG00000165125	130.548	3.5962	1.40981	2.55084	0.0107465	0.246665
ENSG00000156475	14913.5	-0.286931	0.112517	-2.55012	0.0107686	0.246734
ENSG00000136448	2102.99	0.454676	0.178311	2.54991	0.0107752	0.246734
ENSG00000232043	12.1456	4.62929	1.81521	2.55029	0.0107635	0.246734
ENSG00000228212	8.49451	-8.38827	3.29053	-2.54922	0.0107965	0.247026
ENSG00000239300	8.56567	4.22563	1.65785	2.54887	0.0108073	0.247077
ENSG00000287469	7.78017	8.2321	3.23097	2.54787	0.0108383	0.24758
ENSG00000230323	38.7897	2.82	1.10692	2.54761	0.0108465	0.24758
ENSG00000150628	32.0166	4.11812	1.61733	2.54625	0.0108887	0.248151
ENSG00000091010	89.8576	-4.04707	1.58933	-2.5464	0.0108839	0.248151
ENSG00000164347	5826.7	-0.348216	0.136792	-2.54559	0.0109095	0.248427
ENSG00000167397	829.863	0.299914	0.117847	2.54494	0.0109295	0.248688
ENSG00000183775	4185.27	-0.673548	0.264708	-2.54449	0.0109436	0.248813
ENSG00000068137	48.2168	1.82051	0.715933	2.54285	0.0109951	0.249787
ENSG00000125355	2291.85	-0.664445	0.261471	-2.54118	0.0110478	0.250391
ENSG00000108244	4136.25	-4.13936	1.62881	-2.54134	0.0110429	0.250391
ENSG00000268536	4.20074	8.59104	3.3805	2.54135	0.0110424	0.250391
ENSG00000173401	85.5501	1.36308	0.536462	2.54086	0.011058	0.250424
ENSG00000125144	9.89227	4.44779	1.75093	2.54025	0.0110774	0.250667
ENSG00000186453	21.4306	4.87118	1.91787	2.53988	0.011089	0.250732
ENSG00000162836	612.165	-0.911728	0.359031	-2.53941	0.0111038	0.250871
ENSG00000154928	870.12	-0.875231	0.345015	-2.53679	0.0111875	0.251972
ENSG00000196683	6716.87	0.41937	0.165276	2.53739	0.0111682	0.251972
ENSG00000185920	226.056	-1.15049	0.453518	-2.53682	0.0111863	0.251972
ENSG00000198270	1777.34	0.516482	0.203597	2.53679	0.0111874	0.251972
ENSG00000214021	88.7502	-1.14173	0.450259	-2.53572	0.0112217	0.252349
ENSG00000285750	21.9635	-5.42794	2.14039	-2.53596	0.0112139	0.252349
ENSG00000162415	574.376	-1.05377	0.415694	-2.53496	0.0112462	0.252701
ENSG00000229119	379.744	0.474663	0.18729	2.53437	0.0112649	0.25286
ENSG00000260689	30.5589	2.57053	1.01434	2.53419	0.0112708	0.25286
ENSG00000270441	40.8228	-2.93771	1.15963	-2.53331	0.011299	0.252903
ENSG00000289570	5.32028	-5.01745	1.98059	-2.53331	0.011299	0.252903
ENSG00000171724	24740.2	-0.919191	0.362779	-2.53375	0.0112849	0.252903
ENSG00000204392	4591.33	0.303777	0.119946	2.53263	0.0113211	0.253202
ENSG00000180764	67.1441	1.07127	0.42312	2.53183	0.0113468	0.253579
ENSG00000181827	2089.44	0.552697	0.218335	2.53141	0.0113603	0.253685
ENSG00000287811	821.982	-0.678405	0.268071	-2.53069	0.0113838	0.254012
ENSG00000104517	3975.3	0.61264	0.242265	2.5288	0.0114453	0.255187
ENSG00000269696	657.402	-1.53788	0.608285	-2.52822	0.0114642	0.255411
ENSG00000289612	757.064	-0.567269	0.224627	-2.52538	0.0115574	0.256022
ENSG00000251129	4.91624	-8.14822	3.2261	-2.52572	0.0115462	0.256022
ENSG00000146374	16.0677	-7.03068	2.78413	-2.52527	0.011561	0.256022
ENSG00000244242	12.741	4.91039	1.9443	2.52553	0.0115523	0.256022
ENSG00000235872	3.31802	-5.38978	2.13438	-2.52522	0.0115627	0.256022
ENSG00000141505	1163.07	-0.616181	0.243934	-2.52601	0.0115366	0.256022
ENSG00000176749	1082.62	-0.591704	0.234258	-2.52587	0.0115413	0.256022
ENSG00000221946	1718.58	-0.924622	0.366147	-2.52528	0.0115606	0.256022
ENSG00000224520	28.0629	-4.86954	1.92911	-2.52424	0.011595	0.256541
ENSG00000198734	560.175	2.1623	0.856763	2.5238	0.0116094	0.256663
ENSG00000158473	110.449	-3.21432	1.27469	-2.52165	0.0116805	0.257839
ENSG00000162923	3022.06	0.750175	0.297482	2.52175	0.0116773	0.257839
ENSG00000203865	288.863	-0.975	0.386747	-2.52103	0.0117013	0.257952
ENSG00000241163	119.328	2.26841	0.900107	2.52015	0.0117304	0.257952
ENSG00000248740	43.382	-3.74667	1.48624	-2.5209	0.0117055	0.257952
ENSG00000106538	4971.67	1.04676	0.415316	2.5204	0.0117221	0.257952
ENSG00000187134	5535.89	-0.360417	0.142987	-2.52063	0.0117145	0.257952
ENSG00000234694	9.2553	5.20594	2.06652	2.51919	0.0117627	0.258072
ENSG00000020577	514.495	1.06806	0.4239	2.5196	0.0117487	0.258072
ENSG00000130382	112.084	-1.25584	0.498509	-2.5192	0.0117622	0.258072
ENSG00000255418	4.96871	9.07266	3.60187	2.51888	0.011773	0.258102
ENSG00000279853	18.477	5.62416	2.23309	2.51855	0.0117838	0.258142
ENSG00000246422	29.2665	-2.19049	0.870011	-2.51777	0.0118101	0.258521
ENSG00000251453	4.15546	8.37887	3.32907	2.51688	0.0118398	0.25878
ENSG00000065029	402.999	-1.9531	0.775944	-2.51706	0.0118339	0.25878
ENSG00000198162	2859.42	0.572134	0.227504	2.51483	0.0119089	0.259111
ENSG00000133706	19174.3	0.430047	0.171004	2.51484	0.0119086	0.259111
ENSG00000253276	443.576	1.02384	0.407073	2.51512	0.0118992	0.259111
ENSG00000175445	643.011	2.57576	1.02382	2.51583	0.0118752	0.259111
ENSG00000165632	2177.6	0.487633	0.193854	2.51547	0.0118875	0.259111
ENSG00000069188	1239.77	-0.963959	0.383251	-2.51522	0.011896	0.259111
ENSG00000140451	37.8576	5.83891	2.32463	2.51176	0.012013	0.261179
ENSG00000163882	5718.13	0.285127	0.113544	2.51115	0.0120337	0.261432
ENSG00000130255	15610.6	0.316607	0.126116	2.51044	0.0120581	0.261765
ENSG00000289192	2162.99	-1.32831	0.529458	-2.50882	0.0121135	0.262285
ENSG00000272369	63.9541	-0.903515	0.360067	-2.50929	0.0120973	0.262285
ENSG00000153485	987.488	0.403775	0.160968	2.50841	0.0121276	0.262285
ENSG00000291159	81.5208	-1.22102	0.486639	-2.5091	0.012104	0.262285
ENSG00000256525	1308.26	0.523883	0.208848	2.50844	0.0121266	0.262285
ENSG00000163116	26.0099	5.18542	2.06747	2.5081	0.0121381	0.262316
ENSG00000163273	30.7086	-2.17951	0.869691	-2.50607	0.0122082	0.262775
ENSG00000260804	1815.16	-0.586846	0.234163	-2.50615	0.0122055	0.262775
ENSG00000160867	25.3701	-4.50595	1.79814	-2.5059	0.012214	0.262775
ENSG00000242574	164.405	-1.01804	0.406185	-2.50635	0.0121986	0.262775
ENSG00000147140	27744.9	0.210844	0.0841259	2.5063	0.0122004	0.262775
ENSG00000258646	7.62065	5.8308	2.32564	2.50718	0.01217	0.262775
ENSG00000103241	6.49926	-7.65688	3.05697	-2.50473	0.0122546	0.263451
ENSG00000109971	111631	0.218045	0.0871087	2.50313	0.0123099	0.26425
ENSG00000100596	3277.23	0.401672	0.160468	2.50313	0.0123101	0.26425
ENSG00000253164	6.8122	-4.77251	1.90847	-2.5007	0.0123949	0.265281
ENSG00000288575	7.50926	7.44091	2.97488	2.50125	0.0123756	0.265281
ENSG00000111785	2284.7	-0.590931	0.236258	-2.50121	0.0123768	0.265281
ENSG00000168852	14.3468	-3.52906	1.41119	-2.50076	0.0123926	0.265281
ENSG00000164951	9608.3	-0.383407	0.153362	-2.50001	0.0124189	0.265399
ENSG00000244045	1680.62	0.260906	0.104356	2.50015	0.0124141	0.265399
ENSG00000232903	47.0877	-4.82883	1.93238	-2.4989	0.0124578	0.266034
ENSG00000184497	333.306	-1.01806	0.407572	-2.49786	0.0124945	0.266225
ENSG00000102452	1503.93	-1.64541	0.658668	-2.49809	0.0124865	0.266225
ENSG00000179933	11007	0.449325	0.179848	2.49835	0.0124772	0.266225
ENSG00000134668	21.9653	-5.08833	2.03769	-2.49711	0.0125212	0.266597
ENSG00000091527	17773	1.0991	0.44039	2.49575	0.0125692	0.267119
ENSG00000119640	2388.46	0.522943	0.209544	2.49563	0.0125735	0.267119
ENSG00000286424	26.5498	-4.61413	1.84889	-2.49563	0.0125735	0.267119
ENSG00000244476	181.341	6.61917	2.6527	2.49525	0.0125867	0.267203
ENSG00000124731	17.6739	7.96433	3.19293	2.49436	0.0126184	0.267679
ENSG00000158427	361.676	-0.646994	0.259467	-2.49355	0.0126471	0.268092
ENSG00000196352	2020.18	0.47868	0.192154	2.49113	0.0127338	0.269137
ENSG00000047634	3517.37	0.631847	0.253579	2.49172	0.0127128	0.269137
ENSG00000126749	526.537	0.492114	0.197523	2.49143	0.0127232	0.269137
ENSG00000229539	251.807	-1.02974	0.413331	-2.49132	0.0127268	0.269137
ENSG00000212460	10.8027	-4.30336	1.72812	-2.49019	0.0127674	0.269443
ENSG00000266801	45.6585	2.15448	0.865272	2.48994	0.0127763	0.269443
ENSG00000108506	1601.57	-0.522982	0.210037	-2.48995	0.0127763	0.269443
ENSG00000067445	6708.83	-0.726362	0.291796	-2.48928	0.0128001	0.269748
ENSG00000152348	2123.01	0.366197	0.147195	2.48783	0.0128526	0.270656
ENSG00000105792	180.717	1.16236	0.467449	2.48661	0.0128965	0.271383
ENSG00000187815	177.474	1.7292	0.695694	2.48557	0.0129344	0.271981
ENSG00000171311	3901.32	0.362111	0.145703	2.48527	0.0129454	0.272013
ENSG00000058668	1486.7	0.743794	0.299316	2.48498	0.012956	0.272038
ENSG00000186940	4.2294	-3.21959	1.29576	-2.48471	0.0129658	0.272045
ENSG00000198648	777.9	0.937681	0.377502	2.48391	0.0129948	0.272457
ENSG00000116954	1968.1	0.936289	0.377292	2.4816	0.0130794	0.272547
ENSG00000200087	9.38937	4.64624	1.87142	2.48274	0.0130377	0.272547
ENSG00000185689	14.422	-2.95091	1.18953	-2.48073	0.0131113	0.272547
ENSG00000187601	7212.87	-0.297413	0.119829	-2.48199	0.0130651	0.272547
ENSG00000154114	280.889	1.0318	0.415936	2.48066	0.013114	0.272547
ENSG00000156113	687.125	-0.935052	0.376685	-2.48232	0.0130532	0.272547
ENSG00000111412	2946.29	0.631178	0.254415	2.4809	0.0131053	0.272547
ENSG00000100934	12972.7	-0.287476	0.1158	-2.48253	0.0130455	0.272547
ENSG00000036530	435.4	-1.16587	0.470019	-2.48047	0.0131208	0.272547
ENSG00000197696	346.31	-0.726126	0.292536	-2.48218	0.0130583	0.272547
ENSG00000152467	369.999	-0.942887	0.379853	-2.48224	0.0130559	0.272547
ENSG00000273733	10.1955	-4.27411	1.72208	-2.48194	0.0130668	0.272547
ENSG00000142396	1492.7	-0.366961	0.147942	-2.48044	0.0131221	0.272547
ENSG00000254746	57.3326	-4.46158	1.79893	-2.48013	0.0131334	0.272587
ENSG00000283303	54.3235	-2.52044	1.01648	-2.47957	0.013154	0.272621
ENSG00000198088	1154.66	-1.14307	0.460951	-2.4798	0.0131455	0.272621
ENSG00000229647	51.1073	-3.45256	1.39264	-2.47915	0.0131696	0.272749
ENSG00000273321	26.8618	3.00877	1.21399	2.47842	0.0131965	0.27311
ENSG00000068615	19742.4	-0.565698	0.228359	-2.47724	0.0132404	0.273459
ENSG00000068078	44.0256	3.14265	1.26876	2.47694	0.0132513	0.273459
ENSG00000140988	5769.86	0.617299	0.249173	2.47739	0.0132347	0.273459
ENSG00000167131	212.77	-0.912461	0.368361	-2.47709	0.013246	0.273459
ENSG00000133636	21939.3	0.58418	0.235913	2.47626	0.0132768	0.273789
ENSG00000171055	2302.37	0.675337	0.27281	2.47548	0.0133057	0.274142
ENSG00000166037	8541.93	0.386185	0.156016	2.47529	0.0133129	0.274142
ENSG00000235447	280.941	-2.19725	0.888115	-2.47406	0.0133586	0.274886
ENSG00000270977	12.2521	6.66962	2.69624	2.47367	0.0133732	0.274991
ENSG00000134748	6604.81	0.304262	0.123095	2.47177	0.0134446	0.275867
ENSG00000226758	14.1689	3.6547	1.47849	2.47191	0.0134394	0.275867
ENSG00000110427	251.107	-2.44637	0.989654	-2.47194	0.0134381	0.275867
ENSG00000178295	1171.44	-0.976084	0.395272	-2.4694	0.0135341	0.276327
ENSG00000135617	2185.69	-0.555293	0.224841	-2.46972	0.0135219	0.276327
ENSG00000226887	229.947	-5.39256	2.18311	-2.47013	0.0135064	0.276327
ENSG00000171855	4.24749	-10.5006	4.24977	-2.47086	0.0134789	0.276327
ENSG00000137731	34.2078	1.95381	0.791047	2.4699	0.013515	0.276327
ENSG00000201563	13.8839	-2.81382	1.13941	-2.46954	0.0135288	0.276327
ENSG00000157542	3755.47	-0.611563	0.247536	-2.4706	0.0134886	0.276327
ENSG00000248810	21.1561	6.73539	2.72875	2.46831	0.0135752	0.276971
ENSG00000250155	6.61073	-6.73323	2.72947	-2.46686	0.0136305	0.277509
ENSG00000256940	18.706	-1.6231	0.657906	-2.46707	0.0136224	0.277509
ENSG00000123342	40.9613	-4.3318	1.75585	-2.46707	0.0136225	0.277509
ENSG00000116670	5909.74	0.315681	0.128097	2.46439	0.0137247	0.279229
ENSG00000130023	1198.28	0.626743	0.254368	2.46392	0.0137425	0.279229
ENSG00000169059	14.9613	3.46148	1.40503	2.46363	0.0137537	0.279229
ENSG00000164961	5379.23	-0.293752	0.119228	-2.46377	0.0137483	0.279229
ENSG00000223803	18.3355	1.18993	0.483061	2.46332	0.0137656	0.279274
ENSG00000198128	20.5973	6.97712	2.83387	2.46205	0.0138147	0.279544
ENSG00000227214	11.1161	-5.60286	2.27563	-2.46212	0.0138119	0.279544
ENSG00000213719	41328.9	0.173586	0.0705144	2.46171	0.0138276	0.279544
ENSG00000257883	5.64399	-9.25991	3.76195	-2.46147	0.0138371	0.279544
ENSG00000231882	8.23305	5.57555	2.26441	2.46225	0.0138069	0.279544
ENSG00000089050	1089.67	-0.700699	0.284653	-2.46159	0.0138323	0.279544
ENSG00000232893	13.0082	5.68963	2.31203	2.46088	0.0138595	0.279801
ENSG00000280366	4.66295	4.57119	1.85805	2.46021	0.0138857	0.280111
ENSG00000262732	13.8443	-4.28089	1.74021	-2.45999	0.0138943	0.280111
ENSG00000164978	1398.62	0.426145	0.173278	2.45931	0.0139205	0.280248
ENSG00000205274	12.0106	-6.10397	2.48195	-2.45935	0.0139189	0.280248
ENSG00000133256	155.647	-0.901472	0.366821	-2.45753	0.0139898	0.281446
ENSG00000225328	40.7909	-3.27098	1.33183	-2.45601	0.0140489	0.282044
ENSG00000118004	9.18141	-8.88057	3.6154	-2.45632	0.0140368	0.282044
ENSG00000165794	20.7602	6.36162	2.59004	2.45618	0.0140422	0.282044
ENSG00000288886	66.4625	-3.62626	1.47795	-2.45357	0.0141447	0.283376
ENSG00000289306	412.606	1.21476	0.495052	2.45381	0.0141352	0.283376
ENSG00000235784	7.67956	7.59982	3.09711	2.45385	0.0141337	0.283376
ENSG00000264920	1214.8	-0.505567	0.206078	-2.45328	0.0141561	0.283408
ENSG00000292256	4.07195	-4.69165	1.91338	-2.45202	0.0142056	0.283665
ENSG00000101882	1102.37	0.569965	0.232418	2.45232	0.0141936	0.283665
ENSG00000279609	5.34203	-11.1209	4.53448	-2.45251	0.0141863	0.283665
ENSG00000093009	913.415	-5.43603	2.21702	-2.45195	0.0142084	0.283665
ENSG00000138078	27673.1	-0.230671	0.0941405	-2.45029	0.0142742	0.284783
ENSG00000148584	34.2201	-3.94793	1.61166	-2.4496	0.0143014	0.285128
ENSG00000135469	1397.95	-0.548779	0.224077	-2.44907	0.0143225	0.285155
ENSG00000196437	2189.91	-0.700388	0.285966	-2.4492	0.0143173	0.285155
ENSG00000285895	17.5963	-6.14938	2.51314	-2.44689	0.0144095	0.286689
ENSG00000148737	2712.98	0.656478	0.268357	2.44628	0.0144338	0.286974
ENSG00000213366	1595.34	-0.62936	0.257357	-2.44547	0.0144663	0.287161
ENSG00000235149	6.31671	5.36124	2.1926	2.44515	0.0144792	0.287161
ENSG00000181634	1821.76	5.30076	2.16795	2.44505	0.0144831	0.287161
ENSG00000132334	1905.71	0.672952	0.275171	2.44558	0.014462	0.287161
ENSG00000134323	297.011	1.35965	0.556491	2.44326	0.0145553	0.288395
ENSG00000136261	9924.65	0.26331	0.107825	2.44201	0.0146059	0.288999
ENSG00000287545	15.4602	-5.0072	2.05028	-2.44221	0.0145978	0.288999
ENSG00000162552	77.7124	2.62218	1.07448	2.44042	0.0146702	0.289876
ENSG00000250986	38.1739	3.27718	1.34284	2.44048	0.0146676	0.289876
ENSG00000288002	124.904	-3.79826	1.55661	-2.44009	0.0146838	0.289944
ENSG00000115750	1701.15	0.626017	0.256635	2.43933	0.0147144	0.289952
ENSG00000112290	11364.5	-0.761899	0.312338	-2.43934	0.0147142	0.289952
ENSG00000006757	3156.13	-0.346731	0.142139	-2.43938	0.0147126	0.289952
ENSG00000181004	1478.56	-0.584671	0.23996	-2.43653	0.0148289	0.291412
ENSG00000145824	2064.79	1.0994	0.451202	2.43661	0.0148257	0.291412
ENSG00000105325	135.902	1.64814	0.676374	2.43672	0.014821	0.291412
ENSG00000232098	9.20649	2.84156	1.16593	2.43717	0.0148028	0.291412
ENSG00000140391	30439.8	-0.30047	0.123336	-2.43619	0.0148428	0.291488
ENSG00000034510	202124	0.239616	0.0983666	2.43594	0.014853	0.291488
ENSG00000123965	216.75	-0.64182	0.26358	-2.43501	0.0148916	0.292047
ENSG00000226419	581.991	0.85302	0.350481	2.43385	0.0149391	0.292102
ENSG00000287649	31.8542	-2.9301	1.20371	-2.43423	0.0149234	0.292102
ENSG00000251359	25.7342	-3.55563	1.46045	-2.43461	0.0149078	0.292102
ENSG00000273372	19.655	-5.96796	2.452	-2.43392	0.0149365	0.292102
ENSG00000100316	102572	0.234915	0.0965254	2.43371	0.014945	0.292102
ENSG00000213862	14.5651	3.91145	1.60746	2.43331	0.0149616	0.292227
ENSG00000184867	3627.33	-0.505269	0.207806	-2.43145	0.0150387	0.293535
ENSG00000285977	12.7772	3.77275	1.55224	2.43052	0.0150772	0.294087
ENSG00000230124	8733.84	0.478243	0.196881	2.4291	0.0151365	0.294137
ENSG00000147573	1432.51	4.34664	1.78939	2.42911	0.0151358	0.294137
ENSG00000123240	11604	0.254535	0.104765	2.42958	0.0151162	0.294137
ENSG00000167083	13.2061	-5.68717	2.34161	-2.42874	0.0151512	0.294137
ENSG00000132518	40.3154	1.41395	0.581984	2.42953	0.0151185	0.294137
ENSG00000278012	68.1823	1.7313	0.712792	2.4289	0.0151446	0.294137
ENSG00000064490	1722.71	-0.447747	0.184243	-2.4302	0.0150904	0.294137
ENSG00000236830	114.205	-1.7796	0.732914	-2.42811	0.0151778	0.294456
ENSG00000115306	17207.1	0.244376	0.100657	2.42782	0.0151899	0.294492
ENSG00000285713	5.8207	2.78521	1.14768	2.42682	0.0152316	0.294706
ENSG00000161912	25.3986	-2.43608	1.00366	-2.4272	0.0152157	0.294706
ENSG00000188130	479.801	-1.00394	0.413647	-2.42703	0.0152229	0.294706
ENSG00000167552	448781	-0.306712	0.126469	-2.42519	0.0153005	0.29584
ENSG00000264809	3.73357	5.68387	2.34454	2.42431	0.0153377	0.296072
ENSG00000164287	48.3034	-3.17954	1.31199	-2.42345	0.0153741	0.296072
ENSG00000159403	380.89	-2.75524	1.13681	-2.42365	0.0153653	0.296072
ENSG00000157470	397.92	1.74397	0.719587	2.42357	0.0153686	0.296072
ENSG00000179455	19.4153	7.53646	3.10933	2.42382	0.0153583	0.296072
ENSG00000011600	14.5834	-4.01768	1.65738	-2.42411	0.015346	0.296072
ENSG00000288895	3.94565	8.14528	3.36202	2.42273	0.0154043	0.296257
ENSG00000266777	8.07464	5.02747	2.07495	2.42293	0.0153959	0.296257
ENSG00000134779	32436.9	-0.177676	0.0733473	-2.42239	0.0154186	0.296335
ENSG00000100867	1278.13	0.602151	0.248633	2.42185	0.0154419	0.296585
ENSG00000253659	27.835	3.04097	1.25664	2.41992	0.0155241	0.297966
ENSG00000165810	88.1985	-2.17249	0.898145	-2.41887	0.0155689	0.298627
ENSG00000234593	27.9293	3.28261	1.35779	2.41761	0.0156226	0.298704
ENSG00000179163	2954.87	-0.44576	0.184347	-2.41806	0.0156037	0.298704
ENSG00000138032	1069.53	0.803713	0.332324	2.41847	0.0155861	0.298704
ENSG00000232057	24.9307	-6.42651	2.65905	-2.41684	0.0156558	0.298704
ENSG00000290057	32.1668	2.00609	0.829882	2.41732	0.0156355	0.298704
ENSG00000135124	492.272	1.03445	0.42781	2.418	0.0156059	0.298704
ENSG00000171246	504.42	-1.16618	0.482461	-2.41715	0.0156424	0.298704
ENSG00000178531	164.575	0.824513	0.341152	2.41685	0.0156555	0.298704
ENSG00000119866	567.823	0.910303	0.376839	2.41563	0.015708	0.299272
ENSG00000154556	5251.11	-0.438994	0.181745	-2.41544	0.0157163	0.299272
ENSG00000250222	57.5497	1.42978	0.591952	2.41536	0.0157196	0.299272
ENSG00000188690	3911.49	-0.737734	0.305456	-2.41519	0.0157271	0.299272
ENSG00000185104	1818.04	-0.406784	0.168481	-2.41442	0.0157603	0.299706
ENSG00000270533	9.33716	-3.43104	1.42124	-2.41412	0.0157733	0.299755
ENSG00000180822	1895.3	0.421972	0.174911	2.4125	0.0158435	0.30089
ENSG00000167840	2711.5	0.415302	0.172201	2.41172	0.0158773	0.301334
ENSG00000234661	30.5555	2.804	1.16311	2.41078	0.0159185	0.30172
ENSG00000257740	137.404	-0.992679	0.411736	-2.41096	0.0159107	0.30172
ENSG00000137502	3584.45	-0.42094	0.174646	-2.41024	0.0159419	0.301964
ENSG00000141441	1708.96	0.792005	0.328713	2.40941	0.0159782	0.302453
ENSG00000249307	433.072	0.562138	0.23348	2.40765	0.0160556	0.303309
ENSG00000272398	19127.7	0.2666	0.110741	2.40742	0.0160655	0.303309
ENSG00000290837	60.5605	-0.934373	0.388086	-2.40764	0.0160559	0.303309
ENSG00000157423	193.923	-1.49176	0.619486	-2.40806	0.0160375	0.303309
ENSG00000164326	613.033	2.27177	0.943885	2.40683	0.0160916	0.303603
ENSG00000134253	733.279	0.912264	0.379108	2.40634	0.0161132	0.303811
ENSG00000165092	65.1989	-4.8052	1.9972	-2.40597	0.0161294	0.303918
ENSG00000187944	89.043	3.17018	1.31805	2.4052	0.0161638	0.304229
ENSG00000214784	61.3186	0.892654	0.371194	2.40482	0.0161804	0.304229
ENSG00000235279	84.3926	-1.91242	0.795352	-2.40449	0.0161949	0.304229
ENSG00000120675	129.877	3.51218	1.46073	2.40441	0.0161987	0.304229
ENSG00000133121	885.333	-1.06361	0.442254	-2.40498	0.0161734	0.304229
ENSG00000107833	2881.7	0.380684	0.158398	2.40333	0.0162466	0.304769
ENSG00000176619	493.009	0.630777	0.262465	2.40328	0.0162486	0.304769
ENSG00000228223	845.106	-0.775928	0.322941	-2.40269	0.016275	0.305067
ENSG00000274702	8.31902	4.81092	2.00293	2.40194	0.0163082	0.30549
ENSG00000117592	27470.2	-0.23968	0.0998371	-2.40071	0.0163634	0.305927
ENSG00000288966	986.39	-1.20815	0.503237	-2.40077	0.0163608	0.305927
ENSG00000128951	3923.71	0.368022	0.153277	2.40103	0.0163491	0.305927
ENSG00000138095	20392.5	0.279126	0.116308	2.39988	0.0164005	0.306423
ENSG00000283380	48.974	-2.61271	1.08932	-2.39849	0.016463	0.307193
ENSG00000289687	41.488	2.09086	0.871727	2.39853	0.016461	0.307193
ENSG00000221042	7.16636	-3.75902	1.56779	-2.39766	0.0165001	0.307516
ENSG00000131951	336.099	1.32522	0.552726	2.3976	0.0165028	0.307516
ENSG00000141376	1929.49	-0.776137	0.323743	-2.39739	0.0165124	0.307516
ENSG00000164209	9147.48	-0.298815	0.124704	-2.3962	0.0165659	0.308114
ENSG00000079134	3406.94	0.521073	0.217457	2.39622	0.0165652	0.308114
ENSG00000143067	820.492	0.789253	0.329581	2.39471	0.0166334	0.308177
ENSG00000247950	329.527	-0.811254	0.338641	-2.39562	0.0165923	0.308177
ENSG00000242198	3.32133	4.90559	2.04827	2.39499	0.0166207	0.308177
ENSG00000010270	22543.7	-0.131475	0.0548995	-2.39482	0.0166283	0.308177
ENSG00000267259	16.189	6.25794	2.61264	2.39526	0.0166087	0.308177
ENSG00000089199	10729.2	-0.526917	0.21994	-2.39573	0.0165875	0.308177
ENSG00000235494	114.079	-1.18886	0.496524	-2.39437	0.0166487	0.308263
ENSG00000196935	3874.89	-0.515199	0.215315	-2.39277	0.0167219	0.309419
ENSG00000046653	17326.2	-0.321103	0.134246	-2.3919	0.0167616	0.309955
ENSG00000279118	16.3856	5.06956	2.11975	2.39159	0.0167757	0.310017
ENSG00000243818	31.1276	-7.18262	3.0037	-2.39126	0.0167908	0.310097
ENSG00000162852	16316.3	-0.315532	0.132026	-2.38992	0.0168519	0.310796
ENSG00000235665	20.3333	6.09811	2.55244	2.38913	0.0168883	0.310796
ENSG00000286982	6.70138	-8.1238	3.40026	-2.38917	0.0168864	0.310796
ENSG00000270638	14.9856	-5.04772	2.11213	-2.38987	0.0168542	0.310796
ENSG00000139505	16565.2	-0.299978	0.125565	-2.38902	0.0168933	0.310796
ENSG00000125827	9618.52	-0.571805	0.239283	-2.38966	0.016864	0.310796
ENSG00000198312	40.0458	1.58063	0.661964	2.38778	0.0169504	0.311648
ENSG00000097046	6142.19	-0.354056	0.148328	-2.38698	0.0169876	0.311856
ENSG00000248971	9.33602	-5.12988	2.14987	-2.38613	0.0170266	0.311856
ENSG00000233511	7.55575	-3.52456	1.47655	-2.38702	0.0169854	0.311856
ENSG00000096384	190237	0.325708	0.136482	2.38646	0.0170116	0.311856
ENSG00000254884	24.3238	2.2109	0.926394	2.38657	0.0170063	0.311856
ENSG00000073417	325.535	1.14787	0.481031	2.38628	0.0170197	0.311856
ENSG00000113522	1454.47	0.347311	0.145617	2.3851	0.0170746	0.312536
ENSG00000133328	17.5309	-3.60997	1.51378	-2.38474	0.0170911	0.312639
ENSG00000138759	624.255	0.892805	0.37447	2.38419	0.017117	0.312716
ENSG00000125741	714.09	0.754585	0.316477	2.38433	0.0171103	0.312716
ENSG00000269978	15.0527	-2.92153	1.22607	-2.38285	0.0171794	0.312945
ENSG00000146147	89.0097	-2.98094	1.25105	-2.38275	0.0171838	0.312945
ENSG00000267055	8.71038	4.07138	1.70824	2.38338	0.0171542	0.312945
ENSG00000185432	436.504	1.04491	0.438508	2.38288	0.0171777	0.312945
ENSG00000128886	32.4199	2.11794	0.888608	2.38343	0.0171522	0.312945
ENSG00000241322	25.6844	-3.04069	1.27739	-2.38039	0.0172943	0.314759
ENSG00000203757	26.9091	-5.70243	2.39609	-2.37989	0.0173178	0.314987
ENSG00000147174	181.903	1.71252	0.719722	2.37942	0.0173398	0.315189
ENSG00000213430	56.7751	0.894402	0.375928	2.37919	0.0173509	0.315192
ENSG00000221823	476.454	-0.848237	0.356648	-2.37836	0.01739	0.315505
ENSG00000083799	6033.34	-0.380109	0.15981	-2.3785	0.017383	0.315505
ENSG00000261673	74.6294	-1.6759	0.704743	-2.37804	0.0174051	0.31558
ENSG00000136527	15481.9	0.242661	0.102078	2.37722	0.0174438	0.316055
ENSG00000015592	63270.3	-0.388134	0.163302	-2.37679	0.0174642	0.316055
ENSG00000100129	16591.7	0.192829	0.0811276	2.37687	0.0174604	0.316055
ENSG00000074319	19716.4	0.352084	0.148154	2.37648	0.0174788	0.316121
ENSG00000214533	3.78345	-6.0777	2.55789	-2.37606	0.0174988	0.316284
ENSG00000065665	6561.94	-0.396031	0.1667	-2.37571	0.017515	0.316379
ENSG00000101680	1548.54	1.63967	0.690301	2.37529	0.0175351	0.316543
ENSG00000234558	24.0332	-0.942963	0.397076	-2.37477	0.0175599	0.316793
ENSG00000054116	14113.8	0.384372	0.16191	2.37399	0.0175971	0.316817
ENSG00000145103	38.5877	5.34552	2.25296	2.37267	0.0176602	0.316817
ENSG00000145642	296.341	-3.82617	1.61243	-2.37292	0.0176483	0.316817
ENSG00000112679	988.831	0.507237	0.213721	2.37336	0.0176272	0.316817
ENSG00000182674	426.778	-1.50601	0.634698	-2.3728	0.0176539	0.316817
ENSG00000122696	700.634	0.599046	0.252419	2.37322	0.0176335	0.316817
ENSG00000011260	3919.58	0.296173	0.124807	2.37305	0.0176419	0.316817
ENSG00000227115	18817	-1.15055	0.484748	-2.37349	0.0176208	0.316817
ENSG00000159228	2688.98	0.44416	0.187109	2.3738	0.0176062	0.316817
ENSG00000261734	8.27466	-8.70672	3.66996	-2.37243	0.0176717	0.316826
ENSG00000289436	28.2491	2.62334	1.106	2.37192	0.0176962	0.317068
ENSG00000113594	1419.3	0.671373	0.283177	2.37086	0.0177469	0.317249
ENSG00000239556	7.45326	-2.87912	1.21442	-2.37079	0.0177503	0.317249
ENSG00000177374	9.22162	-4.03633	1.70233	-2.37106	0.0177373	0.317249
ENSG00000278845	8245.74	0.384167	0.162009	2.37126	0.0177274	0.317249
ENSG00000205143	80.4453	3.58004	1.51036	2.37032	0.0177728	0.317454
ENSG00000080823	860.831	-0.739422	0.312224	-2.36825	0.0178726	0.31904
ENSG00000286349	8.68937	6.52005	2.75599	2.36577	0.0179926	0.320878
ENSG00000072071	491.317	-0.530438	0.224224	-2.36566	0.0179979	0.320878
ENSG00000083844	453.56	0.711414	0.300863	2.36458	0.0180506	0.321619
ENSG00000105894	10810.6	0.49845	0.210827	2.36427	0.0180658	0.321692
ENSG00000290091	19.2631	-3.27296	1.38448	-2.36403	0.0180771	0.321695
ENSG00000213881	29.9125	0.963614	0.40777	2.36313	0.0181212	0.322082
ENSG00000088386	24.7037	5.2034	2.2018	2.36325	0.0181154	0.322082
ENSG00000139219	471.108	-4.65526	1.97067	-2.36227	0.0181633	0.322631
ENSG00000227466	71.7034	1.88597	0.798593	2.36161	0.0181957	0.322808
ENSG00000174628	625.871	-0.588581	0.249226	-2.36163	0.0181946	0.322808
ENSG00000249631	7.1644	-5.60189	2.3724	-2.36128	0.0182121	0.3229
ENSG00000228629	22.2917	-1.945	0.823847	-2.36087	0.0182321	0.323056
ENSG00000100346	15.5929	4.77239	2.02219	2.36001	0.0182746	0.32361
ENSG00000273073	10.0777	-4.09542	1.73571	-2.3595	0.0182995	0.323852
ENSG00000248187	77.9119	-4.90236	2.07884	-2.35821	0.0183632	0.324581
ENSG00000176907	935.643	1.13053	0.479394	2.35824	0.0183619	0.324581
ENSG00000253744	4.03717	3.818	1.61988	2.35696	0.0184254	0.324685
ENSG00000024862	1905.06	0.446492	0.189428	2.35705	0.0184206	0.324685
ENSG00000089289	5983.15	0.49004	0.207839	2.35779	0.0183842	0.324685
ENSG00000080166	31.8196	5.91389	2.50845	2.35759	0.0183941	0.324685
ENSG00000141854	96.3399	1.62467	0.689209	2.35729	0.0184088	0.324685
ENSG00000227375	8.83536	-5.96432	2.53091	-2.3566	0.0184433	0.324803
ENSG00000186510	6.45299	-5.5003	2.33465	-2.35594	0.0184758	0.324818
ENSG00000265972	454.746	-1.91981	0.814972	-2.35567	0.0184892	0.324818
ENSG00000291081	116.958	1.74864	0.742281	2.35577	0.0184843	0.324818
ENSG00000136026	1781.27	-0.436136	0.185108	-2.35612	0.0184672	0.324818
ENSG00000258548	1765.07	-0.923747	0.392177	-2.35543	0.0185012	0.324831
ENSG00000035499	2874.28	1.51119	0.642507	2.35202	0.018672	0.327629
ENSG00000230433	26.2644	3.319	1.41136	2.35163	0.0186913	0.327769
ENSG00000148123	24249.2	-0.310149	0.131937	-2.35074	0.0187362	0.327957
ENSG00000181019	11229.9	-0.400428	0.170319	-2.35105	0.0187207	0.327957
ENSG00000268751	16.6687	-3.33023	1.41659	-2.35088	0.0187289	0.327957
ENSG00000267128	21.9887	-4.90912	2.09011	-2.34873	0.0188374	0.329492
ENSG00000213218	35.6713	-6.10049	2.59779	-2.34834	0.0188571	0.329492
ENSG00000231236	21.9319	-3.72782	1.58744	-2.34832	0.0188582	0.329492
ENSG00000089009	40980.5	0.293421	0.124993	2.34751	0.0188995	0.330014
ENSG00000125848	11697.5	-0.766803	0.32674	-2.34683	0.0189338	0.330254
ENSG00000183647	366.817	-1.16251	0.495362	-2.34679	0.0189361	0.330254
ENSG00000162407	670.175	-1.29523	0.552464	-2.34447	0.0190541	0.331919
ENSG00000277035	5.76752	5.18202	2.21109	2.34365	0.0190961	0.331919
ENSG00000226609	22.2338	-5.91841	2.52458	-2.34432	0.0190619	0.331919
ENSG00000277767	18.5244	5.98895	2.55485	2.34415	0.0190706	0.331919
ENSG00000265179	203.788	-1.36949	0.584349	-2.34361	0.0190981	0.331919
ENSG00000142530	840.179	0.596646	0.25459	2.34356	0.0191007	0.331919
ENSG00000255458	234.849	-1.09772	0.46882	-2.34146	0.0192084	0.333036
ENSG00000285887	13.064	5.23833	2.23697	2.34171	0.0191958	0.333036
ENSG00000176124	321.683	-0.793948	0.33912	-2.3412	0.0192219	0.333036
ENSG00000272461	11.7696	-3.87374	1.65461	-2.34118	0.0192227	0.333036
ENSG00000154640	6337.88	0.393017	0.167813	2.34199	0.0191812	0.333036
ENSG00000248456	8.52318	5.74035	2.45271	2.34041	0.0192628	0.333327
ENSG00000287591	20.9884	4.84877	2.07196	2.34018	0.0192742	0.333327
ENSG00000109046	13984.2	0.233451	0.0997494	2.34037	0.0192647	0.333327
ENSG00000174748	89863.2	0.213362	0.0911919	2.3397	0.0192994	0.333562
ENSG00000230581	16.7561	-5.10696	2.18382	-2.33855	0.019359	0.333885
ENSG00000175581	3042.6	0.431699	0.184595	2.33863	0.0193548	0.333885
ENSG00000286682	31.6383	-2.14937	0.919147	-2.33844	0.0193644	0.333885
ENSG00000215357	576.678	-1.624	0.694291	-2.33907	0.0193316	0.333885
ENSG00000289004	13.3659	-3.99568	1.70898	-2.33805	0.0193846	0.334034
ENSG00000249096	27.1456	4.02232	1.72114	2.33701	0.0194388	0.334653
ENSG00000129197	6906.89	0.401417	0.171772	2.33691	0.0194437	0.334653
ENSG00000286163	8.17592	8.0658	3.45327	2.3357	0.0195068	0.335539
ENSG00000286691	18.4531	-5.51125	2.36165	-2.33365	0.0196142	0.337184
ENSG00000261462	92.6762	-2.00436	0.859044	-2.33325	0.0196353	0.337345
ENSG00000151376	415.287	-1.36189	0.5839	-2.33241	0.0196792	0.337899
ENSG00000162631	1930.83	-0.77142	0.33085	-2.33163	0.01972	0.337996
ENSG00000206573	6260.05	-0.472906	0.20281	-2.33177	0.019713	0.337996
ENSG00000132434	2474.09	-0.508197	0.217947	-2.33175	0.0197141	0.337996
ENSG00000137203	3068.32	0.850066	0.36468	2.33099	0.0197538	0.338211
ENSG00000101890	14.0198	-6.38967	2.7415	-2.33073	0.0197678	0.338211
ENSG00000214992	8.68964	9.02704	3.87417	2.33006	0.019803	0.338211
ENSG00000070601	74.113	-2.13059	0.914279	-2.33035	0.0197877	0.338211
ENSG00000095303	70.7881	2.97682	1.27747	2.33025	0.0197931	0.338211
ENSG00000107537	4813.98	-0.300124	0.128764	-2.33081	0.0197633	0.338211
ENSG00000136205	345.048	-4.77861	2.05107	-2.32981	0.0198162	0.338236
ENSG00000160991	4601.53	-0.521335	0.223906	-2.32837	0.0198925	0.339246
ENSG00000223855	39.5781	-3.5361	1.5189	-2.32807	0.0199082	0.339246
ENSG00000223722	7.87675	-5.97713	2.56771	-2.32781	0.0199224	0.339246
ENSG00000251844	7.95337	3.17884	1.3655	2.32797	0.0199135	0.339246
ENSG00000168065	8.02804	7.45358	3.20237	2.32752	0.0199377	0.339306
ENSG00000257027	133.156	2.40138	1.03187	2.32721	0.0199542	0.339386
ENSG00000235314	22.1498	-1.99288	0.85655	-2.32663	0.0199848	0.339706
ENSG00000131148	916.334	-0.699704	0.300779	-2.3263	0.0200024	0.339805
ENSG00000121210	2408.31	-0.536072	0.230531	-2.32538	0.0200516	0.340241
ENSG00000230870	7.4666	-5.10343	2.19458	-2.32547	0.020047	0.340241
ENSG00000224184	121.553	-1.05334	0.453234	-2.32406	0.0201222	0.340272
ENSG00000249116	266.074	1.0749	0.462313	2.32504	0.0200698	0.340272
ENSG00000272417	12.1177	3.45017	1.48471	2.3238	0.0201361	0.340272
ENSG00000112685	5122	-0.590222	0.253981	-2.32388	0.0201319	0.340272
ENSG00000290833	67.6103	1.01809	0.438067	2.32405	0.0201229	0.340272
ENSG00000248746	12.4867	-5.58736	2.40359	-2.32459	0.020094	0.340272
ENSG00000171189	1912.17	-0.816713	0.351399	-2.32418	0.0201161	0.340272
ENSG00000181544	1165.51	-0.852227	0.366867	-2.32298	0.02018	0.340814
ENSG00000173320	2361.07	-0.427115	0.183933	-2.32213	0.0202262	0.341327
ENSG00000267731	21.5963	5.60267	2.41289	2.32198	0.0202341	0.341327
ENSG00000224383	5.95672	-4.99937	2.1547	-2.32022	0.0203291	0.34273
ENSG00000181619	552.685	-1.03503	0.446177	-2.31977	0.0203532	0.342935
ENSG00000223382	214.858	1.05328	0.454107	2.31946	0.0203703	0.343024
ENSG00000146205	32.3076	-2.47597	1.06773	-2.31891	0.0204	0.343322
ENSG00000233273	6.0724	-6.85914	2.95886	-2.31817	0.0204398	0.343761
ENSG00000291089	797.932	-0.733307	0.316355	-2.31799	0.0204499	0.343761
ENSG00000156463	110.755	3.68217	1.58894	2.31738	0.0204832	0.343919
ENSG00000120903	15.4699	5.47284	2.36159	2.31744	0.0204798	0.343919
ENSG00000182307	6377.1	-0.484079	0.208917	-2.31709	0.0204988	0.343981
ENSG00000135045	386.18	0.891301	0.385038	2.31484	0.0206218	0.345392
ENSG00000135148	6886	-0.60809	0.262645	-2.31525	0.0205992	0.345392
ENSG00000276564	808.089	0.928553	0.401138	2.3148	0.020624	0.345392
ENSG00000141293	86.046	2.89241	1.2496	2.31467	0.0206308	0.345392
ENSG00000125337	48.2886	2.71499	1.17334	2.31389	0.0206736	0.345612
ENSG00000255372	406.156	-0.635185	0.274506	-2.31392	0.0206722	0.345612
ENSG00000213853	983.123	1.13551	0.4908	2.3136	0.0206899	0.345612
ENSG00000142273	17.8402	6.17442	2.66905	2.31334	0.0207039	0.345612
ENSG00000159212	124.533	3.91587	1.69258	2.31356	0.0206921	0.345612
ENSG00000111266	672.144	-0.832332	0.35983	-2.31312	0.0207159	0.345612
ENSG00000130055	91.6872	6.3622	2.75148	2.31229	0.0207618	0.346178
ENSG00000267454	1177.96	0.714571	0.309148	2.31142	0.0208096	0.346775
ENSG00000163993	88.2586	2.1259	0.919919	2.31097	0.0208346	0.34679
ENSG00000288577	25.8007	-3.49777	1.51351	-2.31103	0.0208311	0.34679
ENSG00000228852	41.5082	-2.50943	1.08615	-2.31038	0.020867	0.346956
ENSG00000154760	244.501	1.82148	0.788401	2.31035	0.0208686	0.346956
ENSG00000224781	11.1889	1.66238	0.719692	2.30985	0.0208962	0.347015
ENSG00000258940	61.3352	1.55889	0.67483	2.31005	0.0208852	0.347015
ENSG00000258752	110.755	1.92717	0.834528	2.30929	0.0209275	0.347333
ENSG00000115738	16687.6	0.279892	0.121267	2.30807	0.0209954	0.34784
ENSG00000163938	11332.6	0.280684	0.121617	2.30794	0.0210026	0.34784
ENSG00000286953	50.9049	-5.62927	2.43928	-2.30776	0.0210126	0.34784
ENSG00000136842	1831.41	0.973088	0.421693	2.30757	0.0210228	0.34784
ENSG00000139618	1882.6	-1.93908	0.840361	-2.30744	0.0210304	0.34784
ENSG00000167315	3659.11	0.395598	0.171433	2.3076	0.0210215	0.34784
ENSG00000164638	661.516	0.607626	0.263364	2.30717	0.0210452	0.347885
ENSG00000287378	30.2811	-2.87268	1.24563	-2.3062	0.0210996	0.348385
ENSG00000133119	5835.71	-0.481271	0.20867	-2.30637	0.0210901	0.348385
ENSG00000185100	142.683	-1.41757	0.615283	-2.30393	0.0212264	0.350279
ENSG00000224292	23.1	-2.92084	1.26804	-2.30344	0.0212543	0.350538
ENSG00000238171	3.39585	4.38919	1.90665	2.30205	0.0213325	0.351538
ENSG00000072818	178.73	-0.978773	0.425197	-2.30193	0.0213394	0.351538
ENSG00000230679	34.3339	1.45608	0.632791	2.30104	0.0213895	0.35177
ENSG00000187514	83114.7	0.385283	0.167534	2.29974	0.0214632	0.35177
ENSG00000237350	190.194	0.552303	0.240071	2.30058	0.0214155	0.35177
ENSG00000112242	1789.29	0.499638	0.217222	2.30013	0.0214411	0.35177
ENSG00000255916	20.3784	-3.63586	1.57999	-2.30119	0.0213806	0.35177
ENSG00000183150	3810.79	0.376283	0.163529	2.30102	0.0213904	0.35177
ENSG00000140285	12.4165	-6.10853	2.65508	-2.30069	0.0214092	0.35177
ENSG00000166073	266.005	-1.27158	0.552893	-2.29987	0.0214554	0.35177
ENSG00000263823	281.271	-1.11465	0.484679	-2.29977	0.0214612	0.35177
ENSG00000173113	11423.2	0.449048	0.195295	2.29933	0.0214863	0.351948
ENSG00000289015	187.969	1.48756	0.647256	2.29825	0.0215475	0.35275
ENSG00000153446	21.2051	3.21868	1.40067	2.29796	0.0215638	0.352816
ENSG00000116661	1483.73	-1.1609	0.505305	-2.29743	0.021594	0.353111
ENSG00000287551	14.0353	4.50843	1.96264	2.29713	0.0216113	0.353193
ENSG00000234648	41.1238	0.747778	0.32559	2.29669	0.0216366	0.353206
ENSG00000287704	10.277	4.94047	2.1511	2.29672	0.021635	0.353206
ENSG00000113240	2498.77	0.477887	0.2081	2.29643	0.0216513	0.353246
ENSG00000112041	28.2788	4.11269	1.79113	2.29614	0.0216679	0.353317
ENSG00000240241	5.95841	7.85027	3.41931	2.29587	0.0216835	0.353371
ENSG00000231550	3.89498	-5.18006	2.25675	-2.29537	0.0217121	0.353554
ENSG00000108055	15718.5	0.486444	0.211936	2.29524	0.0217193	0.353554
ENSG00000272800	71.024	-2.2449	0.978396	-2.29447	0.0217636	0.353883
ENSG00000119509	993.423	-0.603387	0.26298	-2.29442	0.0217661	0.353883
ENSG00000165699	4582	0.47851	0.208569	2.29425	0.0217763	0.353883
ENSG00000100228	183.489	-2.06566	0.900597	-2.29366	0.0218102	0.354235
ENSG00000289209	3.77013	-6.76805	2.95122	-2.2933	0.0218306	0.354366
ENSG00000213335	38.5569	3.61036	1.57471	2.29271	0.0218648	0.35465
ENSG00000164663	221.386	0.738841	0.322306	2.29236	0.021885	0.35465
ENSG00000289703	4.12253	-5.11505	2.23117	-2.29254	0.0218745	0.35465
ENSG00000236372	13.1796	3.7366	1.63045	2.29176	0.0219193	0.355007
ENSG00000163171	5890.72	-0.309984	0.135275	-2.29151	0.0219341	0.355046
ENSG00000171467	662.175	0.777801	0.339507	2.29097	0.0219649	0.355147
ENSG00000213970	14.0288	3.04153	1.32756	2.29108	0.021959	0.355147
ENSG00000125746	441.87	0.913846	0.399096	2.28979	0.0220334	0.356055
ENSG00000128891	1801.7	0.403559	0.17641	2.28762	0.0221597	0.357895
ENSG00000286813	19.6991	-4.39164	1.92028	-2.28697	0.0221974	0.358303
ENSG00000204758	35.0922	-2.34929	1.02736	-2.28672	0.0222122	0.358341
ENSG00000169641	3010.7	0.351748	0.153875	2.28594	0.0222576	0.358672
ENSG00000103449	554.376	0.86304	0.37753	2.28602	0.0222532	0.358672
ENSG00000234283	189.291	0.489845	0.214647	2.2821	0.0224837	0.359303
ENSG00000285361	6.6294	-7.39477	3.23917	-2.28292	0.0224349	0.359303
ENSG00000143382	14.7028	5.54763	2.43081	2.28221	0.0224767	0.359303
ENSG00000163510	6024.35	0.477755	0.20927	2.28296	0.0224325	0.359303
ENSG00000163017	173.425	-4.89603	2.14275	-2.28492	0.0223173	0.359303
ENSG00000289941	14.5413	-4.69919	2.05831	-2.28303	0.0224283	0.359303
ENSG00000251405	6.52206	4.94966	2.16787	2.2832	0.0224189	0.359303
ENSG00000289177	9.75199	-3.5374	1.54923	-2.28333	0.022411	0.359303
ENSG00000225110	9.06638	-5.8924	2.58178	-2.2823	0.0224718	0.359303
ENSG00000102109	2047.63	-1.45582	0.637782	-2.28263	0.0224524	0.359303
ENSG00000285533	331.737	0.739275	0.323721	2.28368	0.0223901	0.359303
ENSG00000236333	197.716	-1.70011	0.744754	-2.28277	0.0224437	0.359303
ENSG00000288820	56.3784	1.97305	0.864491	2.28232	0.0224702	0.359303
ENSG00000185924	69.5947	1.28955	0.564638	2.28386	0.02238	0.359303
ENSG00000273650	10.7385	3.03554	1.32911	2.28388	0.0223787	0.359303
ENSG00000104738	10063	-0.664151	0.291181	-2.28089	0.022555	0.359844
ENSG00000169900	7.65123	5.66065	2.48164	2.28101	0.022548	0.359844
ENSG00000269834	25.6579	-3.14446	1.37849	-2.2811	0.0225425	0.359844
ENSG00000277482	4.59181	-4.60196	2.01797	-2.28049	0.0225789	0.360026
ENSG00000079156	3016.71	-0.483551	0.212066	-2.2802	0.0225961	0.360101
ENSG00000138101	850.93	-0.689378	0.30237	-2.27992	0.0226126	0.360166
ENSG00000280113	10.1841	6.08478	2.66937	2.27948	0.0226383	0.360176
ENSG00000134594	6744.22	0.389032	0.170654	2.27965	0.0226285	0.360176
ENSG00000248984	13.4266	2.98295	1.30884	2.27907	0.0226626	0.360364
ENSG00000124818	18.8933	-5.3264	2.33746	-2.27871	0.0226843	0.360511
ENSG00000144031	215.226	-1.5757	0.691553	-2.27849	0.0226973	0.360515
ENSG00000197410	279.473	-1.69591	0.744733	-2.27721	0.0227739	0.360515
ENSG00000198937	6722.83	0.527916	0.231887	2.27661	0.0228096	0.360515
ENSG00000111846	2654.4	-0.682403	0.299591	-2.27778	0.0227396	0.360515
ENSG00000172331	9321.81	0.376199	0.165138	2.27809	0.0227214	0.360515
ENSG00000232630	56.9324	-2.06176	0.90558	-2.27673	0.0228026	0.360515
ENSG00000226717	57.4206	-1.70896	0.750483	-2.27715	0.0227774	0.360515
ENSG00000283662	12.4687	3.93379	1.72716	2.27761	0.02275	0.360515
ENSG00000287241	17.0626	-4.31773	1.89636	-2.27685	0.022795	0.360515
ENSG00000196562	2160.94	0.374879	0.164603	2.27748	0.0227579	0.360515
ENSG00000101132	13365.8	0.401941	0.176582	2.27623	0.0228325	0.360679
ENSG00000230448	12.0057	5.33988	2.34622	2.27595	0.022849	0.360741
ENSG00000249353	1360.35	0.444636	0.195401	2.27551	0.0228755	0.360962
ENSG00000224411	132.126	0.568989	0.250099	2.27505	0.0229026	0.361193
ENSG00000272620	11.6727	6.9285	3.04606	2.27458	0.0229312	0.361304
ENSG00000231961	6.93212	-5.85903	2.57594	-2.27452	0.0229348	0.361304
ENSG00000047188	1683.74	-0.726551	0.319582	-2.27344	0.0229995	0.362127
ENSG00000183742	719.276	4.21138	1.85294	2.27281	0.0230376	0.362528
ENSG00000167414	267.776	-0.559301	0.24611	-2.27257	0.0230522	0.36256
ENSG00000143891	678.677	0.984829	0.433758	2.27046	0.02318	0.363315
ENSG00000250486	1908.76	-0.627118	0.276345	-2.26933	0.0232484	0.363315
ENSG00000109475	44357	0.395182	0.174091	2.26997	0.0232093	0.363315
ENSG00000269893	5240.08	0.321792	0.141788	2.26952	0.0232364	0.363315
ENSG00000182348	39.998	-4.36965	1.92557	-2.26928	0.0232515	0.363315
ENSG00000062096	1633	-0.519471	0.228849	-2.26992	0.0232122	0.363315
ENSG00000184515	92.9914	-2.01947	0.889606	-2.27007	0.0232033	0.363315
ENSG00000253130	17.2332	-5.4558	2.40345	-2.26999	0.0232081	0.363315
ENSG00000175183	4836.15	-0.395471	0.174219	-2.26996	0.02321	0.363315
ENSG00000273015	3945.27	-0.267941	0.118043	-2.26985	0.0232165	0.363315
ENSG00000199788	4.34109	5.10516	2.2481	2.27088	0.0231541	0.363315
ENSG00000225975	233.776	-0.953723	0.419876	-2.27144	0.0231203	0.363315
ENSG00000213139	63.0782	2.04936	0.903507	2.26823	0.0233153	0.363745
ENSG00000141030	12263.6	-0.214041	0.0943747	-2.268	0.0233295	0.363745
ENSG00000279641	18.0694	-2.80784	1.23793	-2.26817	0.0233189	0.363745
ENSG00000290920	2374.89	0.751571	0.331309	2.26849	0.0232994	0.363745
ENSG00000242659	15.0946	-2.22487	0.981239	-2.26741	0.0233651	0.364105
ENSG00000105982	203.013	-0.824504	0.363676	-2.26714	0.0233817	0.364166
ENSG00000172840	1404.56	0.466062	0.205608	2.26675	0.0234055	0.36434
ENSG00000143164	4959.82	0.403953	0.178321	2.26531	0.0234938	0.364534
ENSG00000212802	599.15	0.38409	0.169527	2.26565	0.0234727	0.364534
ENSG00000230312	3.40212	-7.16176	3.16034	-2.26613	0.0234432	0.364534
ENSG00000136999	161.419	-1.78686	0.788767	-2.26539	0.023489	0.364534
ENSG00000162174	3732.06	0.329721	0.145526	2.26571	0.023469	0.364534
ENSG00000287539	8.85522	4.50198	1.98671	2.26605	0.0234484	0.364534
ENSG00000233287	8.9955	3.95512	1.74667	2.26438	0.0235506	0.365218
ENSG00000221962	13.0778	5.46981	2.41796	2.26216	0.0236877	0.366949
ENSG00000257704	297.896	-1.14077	0.504258	-2.26228	0.0236803	0.366949
ENSG00000226746	8.38372	6.78079	2.99779	2.26193	0.0237016	0.366968
ENSG00000185834	30.1489	0.974467	0.430915	2.26139	0.0237349	0.367287
ENSG00000255733	16.4584	4.54979	2.0127	2.26054	0.0237879	0.367515
ENSG00000100575	1393.79	0.281851	0.124682	2.26057	0.0237861	0.367515
ENSG00000199753	4.07685	-3.81457	1.68731	-2.26074	0.0237756	0.367515
ENSG00000251166	13.6235	4.18658	1.85235	2.26015	0.0238119	0.367547
ENSG00000251205	9.19436	-5.56327	2.46153	-2.26009	0.0238155	0.367547
ENSG00000279672	9.32581	4.67671	2.06954	2.25978	0.023835	0.36765
ENSG00000222607	3.72466	-5.33849	2.36365	-2.25858	0.0239095	0.367963
ENSG00000110721	410.715	0.734769	0.325337	2.25848	0.0239154	0.367963
ENSG00000275703	4.1785	-7.08399	3.13583	-2.25905	0.0238806	0.367963
ENSG00000133112	16047.9	0.364402	0.161317	2.25891	0.0238888	0.367963
ENSG00000142227	202.123	1.27333	0.563814	2.25843	0.023919	0.367963
ENSG00000174282	519.801	0.716181	0.317238	2.25755	0.0239738	0.368215
ENSG00000090932	1372.11	-0.461636	0.204468	-2.25774	0.0239619	0.368215
ENSG00000100413	2093.44	-0.49513	0.219317	-2.2576	0.0239705	0.368215
ENSG00000174672	156.036	1.12236	0.497289	2.25695	0.0240111	0.368592
ENSG00000229550	14.3364	-5.90994	2.61903	-2.25654	0.0240367	0.368593
ENSG00000152578	7499.73	-0.350763	0.155436	-2.25664	0.0240306	0.368593
ENSG00000288972	61.5942	2.64519	1.17292	2.25522	0.0241192	0.368988
ENSG00000278175	460.78	-0.624077	0.276662	-2.25574	0.0240871	0.368988
ENSG00000198416	37.7481	-1.43267	0.635307	-2.25509	0.0241278	0.368988
ENSG00000173208	839.733	-2.15861	0.957025	-2.25554	0.0240994	0.368988
ENSG00000277837	111.383	-1.89113	0.838525	-2.25531	0.024114	0.368988
ENSG00000207053	4.94048	3.95511	1.754	2.25491	0.0241393	0.368988
ENSG00000172992	1099.83	-0.743459	0.329752	-2.2546	0.0241582	0.369082
ENSG00000287916	50.076	-1.10406	0.48981	-2.25407	0.0241919	0.369258
ENSG00000232940	47.6008	1.32635	0.588441	2.25401	0.0241954	0.369258
ENSG00000234350	100.802	-1.59767	0.708927	-2.25364	0.0242188	0.36942
ENSG00000187730	25.4031	-3.97038	1.76265	-2.25251	0.0242899	0.369839
ENSG00000151474	1850.7	-0.388911	0.172681	-2.25219	0.0243104	0.369839
ENSG00000289952	6.94054	3.15086	1.39858	2.25289	0.0242659	0.369839
ENSG00000108468	10370.6	0.268416	0.119166	2.25244	0.0242942	0.369839
ENSG00000279407	17.6289	3.51941	1.56264	2.25222	0.0243086	0.369839
ENSG00000166681	63884.8	0.189224	0.0840811	2.2505	0.0244173	0.370098
ENSG00000288571	27.5603	-4.31161	1.91571	-2.25066	0.0244069	0.370098
ENSG00000120210	81.115	2.51859	1.119	2.25075	0.0244011	0.370098
ENSG00000133958	1470.21	-0.668828	0.297032	-2.2517	0.024341	0.370098
ENSG00000187323	1655.02	-0.566555	0.251715	-2.25078	0.0243996	0.370098
ENSG00000126249	666.916	0.372171	0.165352	2.25077	0.0243998	0.370098
ENSG00000230071	26.8876	2.5419	1.1292	2.25105	0.0243822	0.370098
ENSG00000164305	31366.4	-0.39102	0.173809	-2.24971	0.0244672	0.370465
ENSG00000101871	4249.65	0.797394	0.354433	2.24978	0.0244632	0.370465
ENSG00000179862	7.76199	2.64604	1.17702	2.24808	0.024571	0.371419
ENSG00000249343	7.5837	-5.64337	2.51072	-2.24771	0.0245946	0.371419
ENSG00000289981	11.1601	4.50411	2.00346	2.24817	0.0245655	0.371419
ENSG00000254936	22.9887	3.50671	1.56005	2.24783	0.0245873	0.371419
ENSG00000173145	2200.65	0.648484	0.288456	2.24812	0.0245683	0.371419
ENSG00000119203	9278.77	0.255576	0.113761	2.24661	0.0246648	0.371894
ENSG00000152409	620.646	1.08928	0.484813	2.2468	0.0246525	0.371894
ENSG00000102103	5821.02	0.233879	0.104094	2.2468	0.0246528	0.371894
ENSG00000274993	9.53509	3.87381	1.72532	2.24527	0.024751	0.372609
ENSG00000243911	4.69621	5.97065	2.65921	2.24527	0.0247509	0.372609
ENSG00000107518	1329.26	-0.775907	0.345522	-2.24561	0.0247289	0.372609
ENSG00000241397	7.48629	3.63729	1.62034	2.24477	0.0247828	0.372665
ENSG00000204628	52549.9	0.26094	0.116248	2.24467	0.024789	0.372665
ENSG00000165841	8.37291	-15.6209	6.95938	-2.24459	0.0247946	0.372665
ENSG00000236003	5.51644	3.62207	1.61382	2.2444	0.0248064	0.372665
ENSG00000170430	1113.26	-0.558984	0.249084	-2.24416	0.0248218	0.372702
ENSG00000272631	133.81	-1.03663	0.462164	-2.243	0.0248971	0.373249
ENSG00000139266	996.316	-0.565941	0.252294	-2.24318	0.0248852	0.373249
ENSG00000050405	7003.44	0.57896	0.258103	2.24314	0.0248881	0.373249
ENSG00000236905	11.5091	4.35755	1.94411	2.24141	0.0249997	0.373385
ENSG00000226149	38.8633	2.71618	1.21158	2.24185	0.0249713	0.373385
ENSG00000289559	27.8469	-4.61844	2.05996	-2.24201	0.024961	0.373385
ENSG00000237972	4.8219	-6.47454	2.8888	-2.24125	0.0250098	0.373385
ENSG00000091127	2549.3	-0.49662	0.221455	-2.24253	0.0249271	0.373385
ENSG00000033170	3505.8	0.475623	0.212102	2.24242	0.0249341	0.373385
ENSG00000185559	2570.87	-1.23205	0.549704	-2.2413	0.0250069	0.373385
ENSG00000092199	44115.4	0.308195	0.137476	2.2418	0.0249741	0.373385
ENSG00000187556	172.959	1.12171	0.500717	2.24021	0.0250771	0.374196
ENSG00000288839	724.317	1.0174	0.454293	2.23953	0.0251216	0.374666
ENSG00000150551	1284.05	-0.664334	0.296724	-2.2389	0.0251627	0.375086
ENSG00000230863	31.6411	2.79047	1.24659	2.23848	0.0251896	0.375147
ENSG00000224812	21.9996	-3.81231	1.70312	-2.23843	0.0251929	0.375147
ENSG00000185008	4133.28	-0.427679	0.191105	-2.23792	0.0252261	0.375448
ENSG00000243199	107.996	0.641126	0.286522	2.23761	0.0252465	0.375558
ENSG00000122435	1057.14	0.500614	0.223797	2.23691	0.0252923	0.376046
ENSG00000187010	24.395	2.53582	1.13387	2.23642	0.025324	0.376323
ENSG00000186452	9.25968	-5.20552	2.32838	-2.23569	0.0253722	0.376771
ENSG00000267333	33.2907	3.88163	1.73631	2.23556	0.0253803	0.376771
ENSG00000137509	4594.18	-0.388973	0.174035	-2.23503	0.0254151	0.376899
ENSG00000215193	279.706	0.809884	0.362357	2.23504	0.0254144	0.376899
ENSG00000268297	217.57	-1.93982	0.868017	-2.23477	0.0254324	0.376961
ENSG00000151353	1774.15	-0.375152	0.167895	-2.23445	0.0254535	0.377081
ENSG00000288393	20.8599	5.33089	2.38704	2.23326	0.0255317	0.378045
ENSG00000228492	13.3937	3.65274	1.6362	2.23246	0.0255846	0.378634
ENSG00000086065	19158.2	0.271269	0.121554	2.23167	0.0256366	0.379015
ENSG00000069482	610.502	-1.12353	0.503403	-2.23186	0.0256241	0.379015
ENSG00000153551	1352.1	-1.0466	0.469094	-2.23111	0.0256739	0.379276
ENSG00000279413	43.1318	-1.05708	0.473813	-2.23101	0.0256806	0.379276
ENSG00000105011	1945.58	4.16849	1.86879	2.23058	0.0257091	0.379502
ENSG00000122952	9087.94	-0.442791	0.198546	-2.23017	0.0257365	0.379518
ENSG00000289875	21.4789	-4.44631	1.99368	-2.23021	0.0257336	0.379518
ENSG00000243359	12.4469	-3.16939	1.42144	-2.2297	0.0257675	0.37978
ENSG00000154710	230.339	0.494471	0.221967	2.22768	0.0259021	0.380932
ENSG00000165169	12509.4	0.416473	0.186902	2.2283	0.0258608	0.380932
ENSG00000260585	11.8421	6.75012	3.03031	2.22753	0.0259117	0.380932
ENSG00000253408	8.00875	-6.30372	2.82944	-2.22791	0.0258868	0.380932
ENSG00000184635	2511.73	0.474172	0.212847	2.22776	0.0258962	0.380932
ENSG00000234210	32.3139	3.68379	1.65459	2.2264	0.0259871	0.381846
ENSG00000260920	197.479	1.16997	0.525771	2.22525	0.0260643	0.382201
ENSG00000254090	8.80871	4.38808	1.97186	2.22535	0.0260576	0.382201
ENSG00000187735	13184	0.475258	0.213568	2.22533	0.0260593	0.382201
ENSG00000254466	24.4777	-5.44919	2.4482	-2.22579	0.026028	0.382201
ENSG00000162458	1924.79	0.444817	0.200047	2.22357	0.0261776	0.382283
ENSG00000115816	8664.96	0.408051	0.18343	2.22455	0.0261111	0.382283
ENSG00000180611	1715.25	-0.668989	0.30084	-2.22374	0.0261659	0.382283
ENSG00000170624	190.463	-1.67838	0.754577	-2.22427	0.0261304	0.382283
ENSG00000183808	1714.53	-0.489139	0.219996	-2.2234	0.0261891	0.382283
ENSG00000234771	224.597	1.3564	0.609917	2.22391	0.0261544	0.382283
ENSG00000261329	27.6245	2.28341	1.02697	2.22345	0.0261858	0.382283
ENSG00000004139	104.423	-2.07343	0.932553	-2.22339	0.0261893	0.382283
ENSG00000149451	21.1712	-5.04477	2.2684	-2.22394	0.0261527	0.382283
ENSG00000188643	10219.5	1.38981	0.625836	2.22073	0.0263691	0.382717
ENSG00000266338	1503.92	0.447605	0.201571	2.22058	0.0263794	0.382717
ENSG00000157827	1561.18	0.621901	0.279907	2.22181	0.026296	0.382717
ENSG00000240875	86.6094	-2.7205	1.22525	-2.22037	0.0263933	0.382717
ENSG00000204967	1873.88	-0.978234	0.440575	-2.22036	0.0263944	0.382717
ENSG00000291008	94.5313	1.21306	0.545759	2.22271	0.0262353	0.382717
ENSG00000131171	13055.6	-0.315414	0.142011	-2.22106	0.026347	0.382717
ENSG00000198889	17.4357	6.93304	3.11995	2.22217	0.0262721	0.382717
ENSG00000197550	22.4191	-4.03235	1.81541	-2.22118	0.0263387	0.382717
ENSG00000212135	9.12464	-2.92661	1.31817	-2.22021	0.0264048	0.382717
ENSG00000241185	4.18417	-5.16311	2.32444	-2.22123	0.0263354	0.382717
ENSG00000279602	221.477	1.34471	0.605491	2.22086	0.0263607	0.382717
ENSG00000184828	284.091	0.956393	0.430636	2.22088	0.0263588	0.382717
ENSG00000105492	79.2683	4.0026	1.80215	2.22101	0.0263502	0.382717
ENSG00000235174	133.581	0.519283	0.233911	2.22001	0.0264184	0.38272
ENSG00000147676	2321.39	0.661764	0.298144	2.21962	0.0264449	0.38272
ENSG00000121621	1624.47	1.2704	0.572337	2.21968	0.0264408	0.38272
ENSG00000240563	3328.85	-2.00447	0.903273	-2.21912	0.0264784	0.382821
ENSG00000122543	16.9481	3.50464	1.57927	2.21916	0.0264761	0.382821
ENSG00000228766	11.86	2.28449	1.03007	2.21781	0.026568	0.38313
ENSG00000168538	4003.72	-0.543657	0.24521	-2.21711	0.0266155	0.38313
ENSG00000285809	26.9231	5.54718	2.50056	2.21838	0.0265291	0.38313
ENSG00000139292	62.382	-4.11185	1.85427	-2.2175	0.0265892	0.38313
[truncated: 45,249 more rows]

## Sheet: Table S5
Table S5 | RNAseq DEG analysis of D7 BRD1 vs WT iGLUTs
	baseMean	log2FoldChange	lfcSE	stat	pvalue	padj
ENSG00000280623	7856	-2.10343	0.0928406	-22.6563	1.20786e-113	3.01868e-109
ENSG00000189334	4415.12	-1.78408	0.0997387	-17.8875	1.47611e-71	1.84455e-67
ENSG00000010278	8225.56	-1.11782	0.081125	-13.779	3.40966e-43	2.84048e-39
ENSG00000092820	85775.1	-0.786467	0.058132	-13.529	1.05465e-41	5.27158e-38
ENSG00000198105	263.616	-11.5143	0.85055	-13.5374	9.40232e-42	5.27158e-38
ENSG00000224294	2143.96	-1.64172	0.122391	-13.4138	5.02111e-41	2.09146e-37
ENSG00000121691	209.214	-11.1816	0.864261	-12.9377	2.75724e-38	9.84412e-35
ENSG00000094755	3509.49	-1.80771	0.149907	-12.0589	1.74091e-33	5.43859e-30
ENSG00000272602	109.82	-10.2519	0.86591	-11.8395	2.43928e-32	6.77362e-29
ENSG00000138792	2116.53	-1.69129	0.143986	-11.7462	7.38285e-32	1.84512e-28
ENSG00000289361	139.964	-10.6006	0.935996	-11.3255	9.80959e-30	2.22874e-26
ENSG00000136244	619.54	-1.67037	0.151061	-11.0576	2.01461e-28	4.19576e-25
ENSG00000111913	7544.48	-1.33914	0.121551	-11.0171	3.16244e-28	6.07966e-25
ENSG00000183696	7625.72	-1.29113	0.118383	-10.9064	1.07469e-27	1.91848e-24
ENSG00000276850	908.849	-1.22618	0.113481	-10.8051	3.25449e-27	5.42242e-24
ENSG00000129538	1447.2	-1.99204	0.184552	-10.7939	3.67658e-27	5.74282e-24
ENSG00000147573	4013.59	-1.89891	0.177381	-10.7053	9.61391e-27	1.41336e-23
ENSG00000120211	1510.08	-1.10152	0.104024	-10.5891	3.34793e-26	4.64842e-23
ENSG00000146250	2849.67	1.22646	0.11707	10.4763	1.11013e-25	1.46023e-22
ENSG00000106211	9147.16	-0.750834	0.0738985	-10.1603	2.98035e-24	3.72425e-21
ENSG00000242715	126.903	9.48874	0.944095	10.0506	9.12905e-24	1.08644e-20
ENSG00000087586	9268.07	-0.614887	0.0619685	-9.92256	3.32118e-23	3.77286e-20
ENSG00000170542	8258.04	-1.00554	0.103303	-9.7339	2.16151e-22	2.34871e-19
ENSG00000116016	2959.22	-1.40244	0.146485	-9.57396	1.02887e-21	1.0714e-18
ENSG00000289479	501.004	-1.92963	0.201734	-9.56525	1.11936e-21	1.119e-18
ENSG00000231817	1207.1	-0.868651	0.0917809	-9.4644	2.95241e-21	2.83795e-18
ENSG00000176485	6836.2	-0.807	0.0859883	-9.385	6.29165e-21	5.82374e-18
ENSG00000067715	12423.2	0.598234	0.0639719	9.35151	8.64051e-21	7.71227e-18
ENSG00000058668	2254.1	-0.849775	0.0923469	-9.20199	3.51389e-20	2.95142e-17
ENSG00000137869	1747.74	-2.5932	0.281835	-9.20111	3.54284e-20	2.95142e-17
ENSG00000107105	9355.06	0.597556	0.0667803	8.94809	3.61695e-19	2.91596e-16
ENSG00000095970	2500.42	-1.16912	0.131608	-8.88333	6.48874e-19	5.06771e-16
ENSG00000172137	267.28	-2.18434	0.248571	-8.78758	1.52821e-18	1.15736e-15
ENSG00000197747	17554.9	-0.56873	0.0656466	-8.66351	4.57449e-18	3.36252e-15
ENSG00000088726	4318.06	-0.909199	0.106068	-8.57186	1.01827e-17	7.27101e-15
ENSG00000154040	1402.85	1.16856	0.136676	8.54983	1.23275e-17	8.55802e-15
ENSG00000278044	55.98	-2.26834	0.268137	-8.45961	2.68273e-17	1.81208e-14
ENSG00000152229	5504.5	-0.910204	0.109834	-8.28708	1.16061e-16	7.63313e-14
ENSG00000130600	873.55	-1.67299	0.202038	-8.2806	1.22561e-16	7.85394e-14
ENSG00000269994	1222.92	-1.35346	0.163666	-8.2696	1.34409e-16	8.39787e-14
ENSG00000113196	1385.9	-2.14479	0.261404	-8.20487	2.30847e-16	1.40716e-13
ENSG00000136167	15027.3	-1.40275	0.172099	-8.1508	3.61529e-16	2.15127e-13
ENSG00000163993	232.681	-2.66693	0.328837	-8.11018	5.05428e-16	2.89987e-13
ENSG00000184162	528.137	-1.31486	0.162149	-8.10896	5.1054e-16	2.89987e-13
ENSG00000167641	4655.56	-0.66703	0.0825607	-8.07927	6.51566e-16	3.61865e-13
ENSG00000226535	727.17	-1.61271	0.199934	-8.0662	7.25182e-16	3.93995e-13
ENSG00000167996	223686	-0.597482	0.0743045	-8.041	8.91088e-16	4.73831e-13
ENSG00000188015	1009.9	-1.19635	0.149265	-8.0149	1.10222e-15	5.73892e-13
ENSG00000158764	446.623	-1.93587	0.242042	-7.99807	1.26386e-15	6.44621e-13
ENSG00000196154	10598.1	-0.882011	0.111306	-7.92417	2.29681e-15	1.14804e-12
ENSG00000100097	1895.21	-1.35463	0.172655	-7.84587	4.29945e-15	2.1069e-12
ENSG00000287046	18.0583	21.9118	2.81969	7.771	7.7871e-15	3.70513e-12
ENSG00000184905	843.712	1.09651	0.141123	7.76986	7.85738e-15	3.70513e-12
ENSG00000078018	14663.5	0.605989	0.0782438	7.74488	9.5672e-15	4.42784e-12
ENSG00000134258	1116.51	-1.46606	0.190308	-7.70364	1.32242e-14	6.00909e-12
ENSG00000234741	14403.9	-0.648713	0.0846503	-7.66345	1.81004e-14	8.05821e-12
ENSG00000189058	383.411	-1.29511	0.169041	-7.66149	1.83786e-14	8.05821e-12
ENSG00000165475	561.712	-1.20222	0.157575	-7.62952	2.35632e-14	1.01533e-11
ENSG00000160791	15.0481	21.6641	2.84114	7.62517	2.43714e-14	1.03235e-11
ENSG00000164825	160.014	-1.59842	0.209883	-7.61576	2.62151e-14	1.09195e-11
ENSG00000197769	4578.71	-0.705764	0.0938138	-7.52303	5.35221e-14	2.19283e-11
ENSG00000120306	4654.73	-0.578433	0.07704	-7.50821	5.99392e-14	2.41613e-11
ENSG00000122644	8527.23	0.590503	0.0787664	7.49689	6.53487e-14	2.59237e-11
ENSG00000256546	359.006	-1.53183	0.204804	-7.47949	7.46142e-14	2.91368e-11
ENSG00000148677	11922.3	-0.563576	0.0764023	-7.37643	1.62592e-13	6.25153e-11
ENSG00000178150	2441.75	-1.01808	0.139815	-7.2816	3.29892e-13	1.24919e-10
ENSG00000135917	3379.6	-0.834025	0.115449	-7.2242	5.04049e-13	1.88018e-10
ENSG00000136938	8208.89	-0.413372	0.0580302	-7.12339	1.05307e-12	3.87033e-10
ENSG00000186310	7437.49	0.577778	0.0817318	7.06919	1.5584e-12	5.64456e-10
ENSG00000288811	90.6055	-1.8168	0.258026	-7.04115	1.90666e-12	6.80731e-10
ENSG00000137558	1676.5	1.94123	0.276274	7.02649	2.11795e-12	7.45519e-10
ENSG00000289168	3575.32	-1.01181	0.144113	-7.02097	2.2034e-12	7.64825e-10
ENSG00000130303	13209.5	-0.787402	0.112284	-7.0126	2.33931e-12	8.00877e-10
ENSG00000142910	210.572	-1.33211	0.191035	-6.9731	3.1003e-12	1.04706e-09
ENSG00000138772	28507	-0.410738	0.059097	-6.95023	3.647e-12	1.21528e-09
ENSG00000113396	2192.36	-0.697155	0.100856	-6.9124	4.76521e-12	1.567e-09
ENSG00000197958	19420.2	-0.441641	0.0642678	-6.87189	6.33585e-12	2.05644e-09
ENSG00000126785	180.633	1.1976	0.17486	6.84891	7.44172e-12	2.3844e-09
ENSG00000284294	55.5324	-2.19747	0.322327	-6.81751	9.2633e-12	2.93049e-09
ENSG00000072571	4821.15	-0.703029	0.104643	-6.71834	1.83811e-11	5.74227e-09
ENSG00000122970	4116.37	0.407758	0.0607465	6.71246	1.9137e-11	5.87288e-09
ENSG00000213853	2679.63	-0.648135	0.0965715	-6.71146	1.92692e-11	5.87288e-09
ENSG00000167315	8306.54	-0.441415	0.0660136	-6.68672	2.28223e-11	6.87197e-09
ENSG00000147571	7716.62	-0.929632	0.141598	-6.5653	5.19265e-11	1.54494e-08
ENSG00000143333	12882.2	-1.02267	0.156323	-6.54203	6.0691e-11	1.78446e-08
ENSG00000167634	28.4195	-6.87292	1.05916	-6.48905	8.63814e-11	2.51028e-08
ENSG00000035499	7886.55	-0.598516	0.0923951	-6.47779	9.30739e-11	2.67368e-08
ENSG00000164120	2522.17	-0.821206	0.126875	-6.47257	9.63523e-11	2.73641e-08
ENSG00000101003	10654.2	0.414264	0.0640602	6.46679	1.00106e-10	2.81108e-08
ENSG00000262198	1519.01	-1.04213	0.161596	-6.44899	1.12599e-10	3.12675e-08
ENSG00000134115	353.551	1.06356	0.165223	6.4371	1.21776e-10	3.34442e-08
ENSG00000162998	8308.36	0.739753	0.115168	6.42324	1.33401e-10	3.62386e-08
ENSG00000163328	1315.82	0.743859	0.116421	6.38941	1.66523e-10	4.475e-08
ENSG00000124786	3447.31	0.708974	0.111044	6.38462	1.71819e-10	4.56819e-08
ENSG00000163536	6303.77	0.554765	0.0870032	6.37637	1.8133e-10	4.77031e-08
ENSG00000131171	8777.37	0.573065	0.0899351	6.37199	1.86594e-10	4.81164e-08
ENSG00000151632	393.863	1.35303	0.212345	6.37186	1.86751e-10	4.81164e-08
ENSG00000013588	933.745	-1.74227	0.273629	-6.36729	1.92394e-10	4.90645e-08
ENSG00000240661	363.165	0.988276	0.156654	6.30865	2.81488e-10	7.106e-08
ENSG00000152137	6457.17	-1.32291	0.210525	-6.28385	3.30282e-10	8.25441e-08
ENSG00000226564	323.439	-0.554204	0.0885596	-6.25797	3.90015e-10	9.65075e-08
ENSG00000205544	406.795	-0.518728	0.0829488	-6.25359	4.01112e-10	9.82802e-08
ENSG00000235162	1601.61	-0.515298	0.0829125	-6.21497	5.13359e-10	1.24562e-07
ENSG00000289643	21.407	-6.9167	1.11687	-6.19295	5.90493e-10	1.419e-07
ENSG00000171631	1484.11	-1.59588	0.258014	-6.18525	6.20046e-10	1.47583e-07
ENSG00000170290	190.168	2.16116	0.349727	6.17955	6.42861e-10	1.5157e-07
ENSG00000157111	601.818	-2.05144	0.333426	-6.15262	7.62135e-10	1.78012e-07
ENSG00000184203	26600.3	-0.590971	0.0966274	-6.11597	9.59711e-10	2.21516e-07
ENSG00000169760	888.396	1.30087	0.212738	6.11491	9.6612e-10	2.21516e-07
ENSG00000265992	1206.3	-1.26516	0.207108	-6.10871	1.00441e-09	2.28202e-07
ENSG00000089157	114878	-0.335358	0.0552333	-6.07166	1.26592e-09	2.85026e-07
ENSG00000164932	1547.45	-0.856374	0.141202	-6.06489	1.32045e-09	2.94649e-07
ENSG00000179046	2148.47	-0.729008	0.120268	-6.06153	1.34834e-09	2.98211e-07
ENSG00000130208	831.295	-0.539846	0.0895509	-6.02837	1.65618e-09	3.63081e-07
ENSG00000204531	943.265	-1.51758	0.252271	-6.01567	1.79143e-09	3.89316e-07
ENSG00000109321	428.633	-1.6365	0.272156	-6.01309	1.82025e-09	3.9217e-07
ENSG00000159251	17445.4	-1.43269	0.238535	-6.00618	1.89949e-09	4.05745e-07
ENSG00000127241	474.485	0.97995	0.16384	5.98113	2.21595e-09	4.6933e-07
ENSG00000129422	1247.01	-1.19981	0.20121	-5.96295	2.47719e-09	5.20253e-07
ENSG00000134138	2405.15	0.591984	0.0993512	5.9585	2.54565e-09	5.30175e-07
ENSG00000129596	8014.47	0.717219	0.120798	5.93736	2.89641e-09	5.93337e-07
ENSG00000183036	968.93	0.859857	0.144816	5.93757	2.89276e-09	5.93337e-07
ENSG00000276170	1780.56	-0.534759	0.0900907	-5.93578	2.92454e-09	5.94228e-07
ENSG00000157992	483.654	-0.958466	0.161931	-5.91896	3.23985e-09	6.52986e-07
ENSG00000133110	5050.38	1.02913	0.174514	5.8971	3.69938e-09	7.3964e-07
ENSG00000187323	1195.8	0.898095	0.153484	5.85139	4.87476e-09	9.66905e-07
ENSG00000158164	17507.3	0.550591	0.0941758	5.84642	5.02277e-09	9.82866e-07
ENSG00000254768	876.608	0.840402	0.143756	5.84605	5.03389e-09	9.82866e-07
ENSG00000234685	180.167	-1.2405	0.212417	-5.83992	5.22265e-09	1.01182e-06
ENSG00000106066	10662.1	-0.509408	0.0874457	-5.82543	5.69672e-09	1.08681e-06
ENSG00000228592	2465.98	0.926008	0.158945	5.82598	5.67777e-09	1.08681e-06
ENSG00000115365	9372.28	0.505796	0.0869125	5.8196	5.89898e-09	1.11687e-06
ENSG00000178301	1949.22	-1.21595	0.20918	-5.81295	6.13827e-09	1.15344e-06
ENSG00000187546	27.4313	-8.24933	1.42128	-5.80414	6.46984e-09	1.20667e-06
ENSG00000148834	21059.6	-0.428474	0.0739826	-5.79155	6.97396e-09	1.29106e-06
ENSG00000155622	175.599	-2.23467	0.387025	-5.77397	7.74243e-09	1.42279e-06
ENSG00000185972	23.4738	-8.02605	1.39048	-5.77214	7.82709e-09	1.42784e-06
ENSG00000214114	2009.87	0.413241	0.0717441	5.75994	8.41463e-09	1.5239e-06
ENSG00000146733	15461.6	0.405095	0.0704805	5.74761	9.05133e-09	1.61579e-06
ENSG00000128567	14718	-0.57995	0.100892	-5.74823	9.01835e-09	1.61579e-06
ENSG00000241186	190.948	-3.10294	0.541573	-5.7295	1.00727e-08	1.78537e-06
ENSG00000185869	120.697	-2.26923	0.396431	-5.72414	1.0396e-08	1.8297e-06
ENSG00000188257	125.991	-1.599	0.280792	-5.69463	1.2364e-08	2.16085e-06
ENSG00000185847	2984.7	-0.623325	0.10972	-5.68103	1.33883e-08	2.32362e-06
ENSG00000171530	8181.67	-0.312465	0.0550548	-5.67553	1.38262e-08	2.38306e-06
ENSG00000175445	1571.57	-1.1159	0.196841	-5.66904	1.43602e-08	2.45815e-06
ENSG00000142089	15373.8	-0.553923	0.0985479	-5.62086	1.90013e-08	3.23047e-06
ENSG00000156265	89.7683	2.46351	0.4384	5.61933	1.91702e-08	3.23717e-06
ENSG00000070159	1490.33	-0.980602	0.174585	-5.61676	1.9457e-08	3.26355e-06
ENSG00000067082	33355.4	-0.586723	0.10469	-5.6044	2.08978e-08	3.48186e-06
ENSG00000198242	17009.4	-0.373815	0.0668947	-5.58812	2.29545e-08	3.7992e-06
ENSG00000079459	46662.5	-0.406924	0.0728831	-5.58325	2.36066e-08	3.88142e-06
ENSG00000120594	5769.5	0.590326	0.105764	5.58156	2.3837e-08	3.8937e-06
ENSG00000170419	1344.26	0.538257	0.0965781	5.57328	2.49984e-08	4.05688e-06
ENSG00000250722	2362.13	0.714909	0.128391	5.56819	2.57393e-08	4.15017e-06
ENSG00000246273	2174.36	-0.98599	0.177297	-5.56125	2.67848e-08	4.27645e-06
ENSG00000139970	12111.7	0.402786	0.072434	5.56073	2.68647e-08	4.27645e-06
ENSG00000125726	1869.21	-0.907678	0.163602	-5.54808	2.88823e-08	4.547e-06
ENSG00000196967	1814.81	-0.986954	0.1779	-5.5478	2.89282e-08	4.547e-06
ENSG00000154556	2888.91	0.672435	0.121585	5.53057	3.19198e-08	4.98587e-06
ENSG00000148948	2401.8	0.871189	0.158469	5.49752	3.85169e-08	5.94625e-06
ENSG00000033170	5839.79	-0.576082	0.104792	-5.4974	3.8544e-08	5.94625e-06
ENSG00000007372	368.36	1.7222	0.318173	5.41277	6.20587e-08	9.51516e-06
ENSG00000169189	4071.43	-0.49842	0.092167	-5.40779	6.38072e-08	9.7236e-06
ENSG00000140575	29076.5	-0.438747	0.0811522	-5.40647	6.42797e-08	9.73624e-06
ENSG00000102048	203.809	1.53292	0.283782	5.40174	6.59986e-08	9.93636e-06
ENSG00000198075	2666.07	0.716796	0.132783	5.39825	6.72941e-08	1.00707e-05
ENSG00000166147	1542.13	1.23564	0.229058	5.39443	6.87417e-08	1.02261e-05
ENSG00000145721	6403.45	0.684122	0.127083	5.38326	7.31475e-08	1.08057e-05
ENSG00000260193	200.64	-0.972705	0.18072	-5.38239	7.35023e-08	1.08057e-05
ENSG00000145642	827.973	0.959846	0.178932	5.3643	8.1264e-08	1.18769e-05
ENSG00000162981	3020.82	1.38564	0.258683	5.3565	8.48494e-08	1.23288e-05
ENSG00000127328	4004.84	-0.478138	0.089385	-5.34919	8.83485e-08	1.2763e-05
ENSG00000230426	3226.43	-0.949314	0.177538	-5.3471	8.93728e-08	1.28368e-05
ENSG00000187608	14981.1	-0.614341	0.115254	-5.33033	9.80358e-08	1.40006e-05
ENSG00000136021	7075.48	0.431285	0.0811264	5.31621	1.0595e-07	1.50449e-05
ENSG00000129173	1461.67	-0.744163	0.140091	-5.31198	1.08438e-07	1.53112e-05
ENSG00000148219	4275.75	0.518649	0.0976942	5.3089	1.1029e-07	1.54851e-05
ENSG00000189129	1693.83	-0.427937	0.080999	-5.28324	1.26919e-07	1.77205e-05
ENSG00000211455	9293.62	0.575672	0.109225	5.27054	1.36027e-07	1.88865e-05
ENSG00000174444	78773	-0.265816	0.0505819	-5.25517	1.47889e-07	2.04201e-05
ENSG00000130158	113.527	-1.70396	0.324867	-5.2451	1.56199e-07	2.1449e-05
ENSG00000118785	39827	-1.14663	0.21886	-5.23911	1.61355e-07	2.2036e-05
ENSG00000118777	8973.63	-0.681898	0.130259	-5.23494	1.65042e-07	2.24171e-05
ENSG00000152642	5895.76	-0.426356	0.081483	-5.23245	1.67275e-07	2.25009e-05
ENSG00000171928	7917.51	-0.589777	0.11272	-5.23225	1.6746e-07	2.25009e-05
ENSG00000232301	115.498	-1.79484	0.344347	-5.21231	1.86504e-07	2.49257e-05
ENSG00000101868	7460.37	0.404749	0.0777336	5.20687	1.92051e-07	2.55306e-05
ENSG00000113163	7528.3	-0.380833	0.0732856	-5.19655	2.03019e-07	2.68458e-05
ENSG00000177954	43162.6	-0.421331	0.0813552	-5.17891	2.2319e-07	2.93577e-05
ENSG00000196352	2409.02	-0.586012	0.113329	-5.17088	2.32992e-07	3.04866e-05
ENSG00000164171	2235.1	-0.673654	0.130427	-5.16498	2.40459e-07	3.12835e-05
ENSG00000147257	114973	0.294681	0.0570632	5.16411	2.41586e-07	3.12835e-05
ENSG00000197766	232.948	-1.28196	0.249626	-5.13553	2.81343e-07	3.62439e-05
ENSG00000108244	11831.6	0.615891	0.119975	5.13349	2.84424e-07	3.6453e-05
ENSG00000124532	27061.4	-0.377942	0.0737635	-5.1237	2.996e-07	3.8202e-05
ENSG00000197632	338.15	-1.27924	0.250247	-5.11189	3.18944e-07	4.04622e-05
ENSG00000243701	8012.79	0.500801	0.098502	5.08417	3.69232e-07	4.66053e-05
ENSG00000064687	534.587	-0.854822	0.168268	-5.08013	3.77184e-07	4.73698e-05
ENSG00000144354	1576.86	-1.06633	0.210442	-5.06709	4.03934e-07	5.04756e-05
ENSG00000197020	1579.46	0.638844	0.126147	5.06429	4.09919e-07	5.09687e-05
ENSG00000106631	2308.05	-0.555838	0.109825	-5.06111	4.16828e-07	5.13916e-05
ENSG00000175787	189.15	-1.19288	0.235708	-5.06083	4.17434e-07	5.13916e-05
ENSG00000109339	11199	0.561685	0.111588	5.03357	4.8142e-07	5.89786e-05
ENSG00000003989	4538.1	-1.00921	0.201075	-5.01908	5.19183e-07	6.32947e-05
ENSG00000231500	83313.9	-0.365048	0.0728067	-5.01394	5.33275e-07	6.46972e-05
ENSG00000088387	5985.85	-0.952063	0.189966	-5.01176	5.39357e-07	6.51189e-05
ENSG00000289484	24.9736	-8.11359	1.61933	-5.01047	5.42962e-07	6.5239e-05
ENSG00000105492	225.979	-2.82301	0.565086	-4.99572	5.86168e-07	7.00934e-05
ENSG00000134986	5186.04	0.455046	0.0911616	4.99164	5.98682e-07	7.12489e-05
ENSG00000125378	9480.79	-0.545992	0.109603	-4.98154	6.30792e-07	7.44393e-05
ENSG00000128422	797.154	-1.53549	0.308248	-4.98134	6.31447e-07	7.44393e-05
ENSG00000153253	1911.82	0.879297	0.177123	4.96431	6.89441e-07	8.05355e-05
ENSG00000039560	16048.5	-0.427489	0.0861132	-4.96427	6.89605e-07	8.05355e-05
ENSG00000137573	5411.08	0.652046	0.131392	4.9626	6.9555e-07	8.0852e-05
ENSG00000260000	561.727	1.01834	0.205827	4.94753	7.51615e-07	8.67159e-05
ENSG00000106341	5494.64	0.630092	0.127364	4.94719	7.52935e-07	8.67159e-05
ENSG00000254277	85.0856	-2.79676	0.566119	-4.94023	7.80286e-07	8.94537e-05
ENSG00000198157	1079.16	0.897294	0.181724	4.93768	7.90574e-07	9.02193e-05
ENSG00000180694	1305.53	-0.900437	0.182413	-4.93626	7.96352e-07	9.04655e-05
ENSG00000172965	1766.47	-0.521053	0.10561	-4.93374	8.06715e-07	9.12282e-05
ENSG00000176641	619.75	0.846237	0.171604	4.93135	8.16648e-07	9.19354e-05
ENSG00000254682	562.133	-0.947681	0.192255	-4.92928	8.25335e-07	9.22634e-05
ENSG00000139547	16.805	7.5356	1.52886	4.9289	8.26944e-07	9.22634e-05
ENSG00000104549	18737.8	-0.531509	0.108009	-4.92095	8.61266e-07	9.54895e-05
ENSG00000183426	138.006	-0.93926	0.190889	-4.92044	8.63502e-07	9.54895e-05
ENSG00000143632	11533.7	-0.767495	0.156021	-4.91918	8.6908e-07	9.5683e-05
ENSG00000111371	49494.4	-0.374859	0.0762877	-4.91376	8.93458e-07	9.79356e-05
ENSG00000055732	2674.5	-0.650876	0.133289	-4.88319	1.04383e-06	0.000112744
ENSG00000204711	197.726	-0.920085	0.188439	-4.88267	1.0466e-06	0.000112744
ENSG00000057294	43412.3	-0.465581	0.0953345	-4.88365	1.04138e-06	0.000112744
ENSG00000229557	206.11	-1.23908	0.253674	-4.88454	1.03668e-06	0.000112744
ENSG00000224228	10.9066	-4.78383	0.983091	-4.86611	1.13817e-06	0.000122082
ENSG00000018236	7604.09	0.542067	0.111784	4.84924	1.23936e-06	0.000132368
ENSG00000115474	1049.12	1.01945	0.210303	4.84752	1.25011e-06	0.000132922
ENSG00000219507	515.644	-0.55879	0.115298	-4.84646	1.25684e-06	0.000132922
ENSG00000090013	2559.88	-0.457949	0.0945026	-4.84588	1.2605e-06	0.000132922
ENSG00000234451	79.8953	1.58423	0.326982	4.84501	1.26605e-06	0.000132946
ENSG00000203711	180.616	-1.3625	0.282612	-4.82109	1.42775e-06	0.000149299
ENSG00000126790	511.668	0.758453	0.157683	4.80998	1.50949e-06	0.000156775
ENSG00000259129	335.68	0.828443	0.172245	4.80967	1.51179e-06	0.000156775
ENSG00000169242	3708.52	-0.552924	0.115004	-4.80785	1.52563e-06	0.000157556
ENSG00000074410	550.02	-1.24944	0.259937	-4.80669	1.53449e-06	0.000157819
ENSG00000182551	13804.9	0.47244	0.0983813	4.80213	1.56987e-06	0.000160139
ENSG00000224078	16632	0.328073	0.0683164	4.80225	1.56894e-06	0.000160139
ENSG00000105640	80271.3	-0.294689	0.0614088	-4.7988	1.59619e-06	0.000162163
ENSG00000173272	1599.52	0.346889	0.0723667	4.79348	1.6391e-06	0.000165847
ENSG00000113161	29337.2	-0.500872	0.104927	-4.77355	1.81011e-06	0.000182412
ENSG00000091664	9317.84	0.699587	0.14669	4.76915	1.85009e-06	0.000185693
ENSG00000160213	7524.4	-0.380839	0.0800468	-4.7577	1.95811e-06	0.000195748
ENSG00000164220	769.034	0.906075	0.190495	4.75643	1.97046e-06	0.000196199
ENSG00000197956	93.4256	-1.96338	0.413176	-4.75192	2.01498e-06	0.000199835
ENSG00000164924	130500	-0.18125	0.0382117	-4.74331	2.1025e-06	0.00020769
ENSG00000231764	249.54	1.11589	0.235498	4.73843	2.15377e-06	0.000211918
ENSG00000288539	11.1821	6.95007	1.46878	4.73185	2.22478e-06	0.000218046
ENSG00000249993	30.3275	-3.61744	0.764992	-4.72874	2.2592e-06	0.000220555
ENSG00000231989	84.1675	-0.870299	0.184315	-4.7218	2.33771e-06	0.000227331
ENSG00000198934	31.8442	-8.46581	1.79385	-4.71935	2.36601e-06	0.000229191
ENSG00000114529	3748.32	-0.830546	0.176163	-4.71465	2.42127e-06	0.000233639
ENSG00000187134	973.229	0.67094	0.14242	4.71099	2.46511e-06	0.000236954
ENSG00000159023	4546.95	0.402073	0.0853811	4.70915	2.48748e-06	0.000238188
ENSG00000134215	446.592	0.867449	0.184432	4.70335	2.55921e-06	0.000244122
ENSG00000175782	4530.34	0.442477	0.0942035	4.69703	2.63969e-06	0.000250841
ENSG00000288041	99.8014	-2.19724	0.467989	-4.69506	2.66524e-06	0.00025231
ENSG00000197353	86.9671	-2.25473	0.482973	-4.66843	3.03506e-06	0.000286235
ENSG00000126947	84.9481	-3.31714	0.711081	-4.66493	3.08721e-06	0.000290059
ENSG00000159200	6878.51	0.444844	0.0956039	4.65299	3.2715e-06	0.000306223
ENSG00000154640	16556.9	-0.282737	0.0607998	-4.65029	3.31473e-06	0.000309111
ENSG00000093144	9369.78	0.416842	0.0897255	4.64574	3.38855e-06	0.00031482
ENSG00000102032	69.2813	-2.02159	0.435484	-4.64218	3.44755e-06	0.000319116
ENSG00000154914	279.788	-0.796039	0.171804	-4.63342	3.59676e-06	0.000331698
ENSG00000136960	1980.27	0.604885	0.130765	4.62575	3.73251e-06	0.000342744
ENSG00000011422	956.336	-0.806294	0.17433	-4.62511	3.74396e-06	0.000342744
ENSG00000145681	58458.2	-0.299062	0.0647821	-4.61643	3.90392e-06	0.000354788
ENSG00000148175	12266.6	-0.356407	0.0772033	-4.61647	3.90323e-06	0.000354788
ENSG00000145526	2214.68	0.919214	0.199237	4.61367	3.95623e-06	0.00035824
ENSG00000100739	10.4255	-6.85325	1.4862	-4.61125	4.00259e-06	0.000361129
ENSG00000140006	2970.85	-0.75366	0.164207	-4.58968	4.43918e-06	0.000399079
ENSG00000175063	21766.5	-0.411507	0.089761	-4.58448	4.55117e-06	0.00040768
ENSG00000204262	2464.23	0.686645	0.149815	4.58329	4.57711e-06	0.00040854
ENSG00000104490	5266.25	0.584954	0.127845	4.5755	4.75088e-06	0.000422541
ENSG00000100154	914.368	0.893181	0.195255	4.57443	4.77528e-06	0.000423205
ENSG00000197279	2050.38	-1.44289	0.3155	-4.57335	4.79992e-06	0.000423886
ENSG00000015592	14648.6	0.543664	0.118901	4.57239	4.82186e-06	0.000424324
ENSG00000177551	2149.34	1.03386	0.226557	4.56336	5.03415e-06	0.000441451
ENSG00000187601	3078.79	0.498356	0.109277	4.5605	5.10327e-06	0.000445947
ENSG00000091986	1550.22	0.663091	0.145827	4.54709	5.43916e-06	0.000473643
ENSG00000172116	238.079	-1.24212	0.273237	-4.54595	5.46882e-06	0.000474572
ENSG00000160097	1127.84	0.684927	0.150779	4.54259	5.55684e-06	0.000480542
ENSG00000149273	97331.4	-0.281983	0.0622433	-4.53033	5.88905e-06	0.000507515
ENSG00000144834	5859.7	0.647391	0.142965	4.52831	5.94569e-06	0.000510634
ENSG00000177485	5192.99	0.465564	0.102834	4.52735	5.97279e-06	0.000511205
ENSG00000198625	2966.21	-0.476197	0.105219	-4.52576	6.01781e-06	0.000513301
ENSG00000229261	10.2872	-6.83329	1.51171	-4.52025	6.17664e-06	0.000525056
ENSG00000167325	35838.7	0.300186	0.0664502	4.51746	6.25847e-06	0.000530209
ENSG00000148019	11331.3	0.330229	0.073258	4.50774	6.55204e-06	0.000553205
ENSG00000226453	52.3303	1.97498	0.438875	4.5001	6.7923e-06	0.00057156
ENSG00000224525	171.886	-2.51662	0.562125	-4.47697	7.57101e-06	0.000634949
ENSG00000101000	2652.1	-0.699881	0.156465	-4.47309	7.70966e-06	0.000644414
ENSG00000131558	6003.94	0.351381	0.0786232	4.46918	7.85183e-06	0.00065411
ENSG00000155093	750.874	1.12841	0.252776	4.46407	8.04182e-06	0.000666423
ENSG00000182985	49452.1	0.274468	0.0614879	4.46377	8.05297e-06	0.000666423
ENSG00000102218	26807.7	-0.478852	0.107325	-4.4617	8.13114e-06	0.000670672
ENSG00000135248	298.845	-1.39034	0.311989	-4.45637	8.33603e-06	0.000685309
ENSG00000138400	225.729	1.28364	0.288133	4.45501	8.38885e-06	0.000686012
ENSG00000058091	1826.18	0.802905	0.180236	4.45474	8.39948e-06	0.000686012
ENSG00000197935	158.956	0.991726	0.222789	4.45143	8.53023e-06	0.000694422
ENSG00000258655	1520.17	0.481187	0.108128	4.45017	8.58005e-06	0.00069621
ENSG00000166920	40.5555	-1.52655	0.344255	-4.43436	9.23477e-06	0.000746911
ENSG00000171757	254.59	1.48924	0.336536	4.4252	9.63534e-06	0.000776795
ENSG00000164172	7308.81	0.396123	0.0895651	4.42274	9.74564e-06	0.000780651
ENSG00000285294	116.764	-1.20371	0.272128	-4.42332	9.71958e-06	0.000780651
ENSG00000111907	4235.04	0.311483	0.0704598	4.42072	9.83745e-06	0.000782986
ENSG00000183032	429.117	0.945975	0.213979	4.42088	9.83018e-06	0.000782986
ENSG00000188643	29002.3	-0.597732	0.135408	-4.4143	1.01338e-05	0.000804014
ENSG00000198673	1928.61	0.944742	0.214273	4.40905	1.03823e-05	0.000821123
ENSG00000226886	194.746	0.814255	0.18522	4.39614	1.10191e-05	0.000868738
ENSG00000149970	4331.45	0.451575	0.102741	4.39526	1.10641e-05	0.00086954
ENSG00000118432	2230.2	0.773866	0.176453	4.38567	1.15627e-05	0.000905879
ENSG00000116679	62384.5	-0.315136	0.071978	-4.37823	1.19648e-05	0.000930993
ENSG00000164330	7779.23	0.450776	0.102979	4.37736	1.20128e-05	0.000930993
ENSG00000274750	163.168	1.73245	0.395808	4.377	1.20323e-05	0.000930993
ENSG00000184470	2599.61	-0.575631	0.13148	-4.37811	1.19716e-05	0.000930993
ENSG00000146282	11467.6	0.335157	0.0766057	4.37508	1.21386e-05	0.000936319
ENSG00000256537	5328.11	0.408073	0.0933663	4.37067	1.23866e-05	0.000952508
ENSG00000139364	544.427	1.22537	0.280605	4.36688	1.26036e-05	0.000966221
ENSG00000102445	1210.16	-0.695505	0.159399	-4.36329	1.28124e-05	0.000979226
ENSG00000153029	2440.26	-0.465315	0.106838	-4.35532	1.32872e-05	0.00101147
ENSG00000165061	1574.88	0.814271	0.18698	4.35486	1.33152e-05	0.00101147
ENSG00000134107	3208.93	-1.07493	0.24697	-4.35248	1.34604e-05	0.00101632
ENSG00000136026	1893.82	0.374358	0.086004	4.3528	1.34413e-05	0.00101632
ENSG00000105467	7.90402	-6.45734	1.48475	-4.3491	1.36696e-05	0.00102901
ENSG00000162813	2002.52	0.578165	0.133	4.3471	1.37946e-05	0.0010353
ENSG00000253573	10.5169	3.30634	0.760856	4.34556	1.38923e-05	0.00103951
ENSG00000162377	2739.73	-0.43446	0.100041	-4.34284	1.40654e-05	0.00104932
ENSG00000198918	14734	-0.321258	0.0740717	-4.33712	1.44365e-05	0.0010738
ENSG00000101846	18591.2	-0.316585	0.0731346	-4.3288	1.49921e-05	0.00111182
ENSG00000024526	3940.52	-0.521696	0.120769	-4.31979	1.56175e-05	0.00115477
ENSG00000165125	357.683	-1.54186	0.357158	-4.31702	1.58153e-05	0.00116595
ENSG00000138061	1376.66	-0.672195	0.155949	-4.31035	1.62997e-05	0.0011976
ENSG00000151491	5369.71	0.599915	0.139213	4.30934	1.63742e-05	0.0011976
ENSG00000082397	2076.99	0.601135	0.139502	4.30915	1.63884e-05	0.0011976
ENSG00000117360	4058.7	0.429633	0.0997206	4.30837	1.64465e-05	0.00119834
ENSG00000124882	10.4203	-6.85439	1.5932	-4.30229	1.69043e-05	0.00122811
ENSG00000172348	893.777	0.695206	0.161776	4.29735	1.72855e-05	0.00125217
ENSG00000137210	6991.2	0.320029	0.0744855	4.29653	1.73494e-05	0.00125317
ENSG00000079150	2729	0.835126	0.194556	4.29248	1.76691e-05	0.00127258
ENSG00000172183	431.445	-0.837083	0.195064	-4.29132	1.77612e-05	0.00127554
ENSG00000102547	3487.45	0.444823	0.103678	4.29045	1.78313e-05	0.00127691
ENSG00000168615	8761.27	-0.554346	0.129305	-4.28712	1.81004e-05	0.00129247
ENSG00000118515	2980.7	0.603968	0.140917	4.286	1.8192e-05	0.00129531
ENSG00000268471	452.643	0.870762	0.203255	4.28409	1.83489e-05	0.00130277
ENSG00000139219	1331.91	-0.683882	0.159824	-4.27898	1.87752e-05	0.00132641
ENSG00000170373	216.548	-2.41489	0.56438	-4.27883	1.87879e-05	0.00132641
ENSG00000117592	67566.7	0.429512	0.100502	4.27369	1.92265e-05	0.00135354
ENSG00000289192	290.124	1.72836	0.4045	4.27284	1.92997e-05	0.00135488
ENSG00000228528	400.539	0.714348	0.167283	4.27031	1.95206e-05	0.00136655
ENSG00000155511	717.941	0.59991	0.140687	4.26415	2.00669e-05	0.00140087
ENSG00000150625	7038.8	0.608441	0.142834	4.25979	2.04618e-05	0.00142446
ENSG00000125675	582.653	1.01772	0.23896	4.25896	2.05382e-05	0.00142581
ENSG00000118263	4959.56	0.401598	0.0943855	4.25487	2.09172e-05	0.0014481
ENSG00000162402	2540.14	-0.615024	0.144766	-4.24841	2.15294e-05	0.00148636
ENSG00000227382	8.44988	6.54118	1.5424	4.24092	2.22604e-05	0.00153259
ENSG00000244476	508.862	-2.25334	0.5316	-4.23878	2.24736e-05	0.00154302
ENSG00000182504	2495.78	0.504278	0.119071	4.23509	2.28455e-05	0.00156426
ENSG00000145741	27993.9	-0.208169	0.0492561	-4.22626	2.37606e-05	0.00162247
ENSG00000177707	1934.88	0.645861	0.15291	4.2238	2.40222e-05	0.00163586
ENSG00000123810	224.377	0.990068	0.234442	4.22309	2.40979e-05	0.00163656
ENSG00000142541	52874.7	-0.2832	0.0672095	-4.21368	2.51241e-05	0.00170163
ENSG00000128594	350.724	0.627683	0.149079	4.2104	2.54921e-05	0.00172189
ENSG00000269526	4.27443	-5.56711	1.32349	-4.20638	2.59491e-05	0.00174803
ENSG00000163923	7178.27	0.37494	0.0892045	4.20315	2.63225e-05	0.00176368
ENSG00000106538	14006.8	-0.786179	0.187044	-4.20318	2.63185e-05	0.00176368
ENSG00000116711	4968.72	0.446617	0.106293	4.20174	2.64869e-05	0.00176523
ENSG00000003096	4218.7	0.679682	0.161739	4.20233	2.64176e-05	0.00176523
ENSG00000183230	5014.29	0.485907	0.115694	4.19994	2.66986e-05	0.0017699
ENSG00000172987	80.1395	1.75631	0.418116	4.20054	2.66283e-05	0.0017699
ENSG00000164967	1452.09	-0.536753	0.127886	-4.19713	2.70317e-05	0.00178724
ENSG00000117399	5942.01	-0.640897	0.152967	-4.18976	2.79248e-05	0.00183657
ENSG00000125779	1489.18	-0.336248	0.0802505	-4.18998	2.78979e-05	0.00183657
ENSG00000148840	213.849	-1.04328	0.249415	-4.18291	2.87803e-05	0.00188787
ENSG00000163666	316.062	1.45313	0.348011	4.17554	2.97282e-05	0.00194494
ENSG00000143164	3078.41	-0.462173	0.11073	-4.17389	2.99446e-05	0.00195398
ENSG00000197696	343.123	0.659155	0.158059	4.17031	3.04185e-05	0.00197334
ENSG00000176046	545.434	-0.867099	0.207887	-4.17102	3.03241e-05	0.00197334
ENSG00000153822	27.2673	2.74318	0.657858	4.16986	3.04781e-05	0.00197334
ENSG00000175061	8088.65	-0.378456	0.0908197	-4.16712	3.08477e-05	0.00199211
ENSG00000188647	2846.19	-0.572391	0.137385	-4.16632	3.09554e-05	0.00199391
ENSG00000157703	379.945	-1.19183	0.286409	-4.16129	3.1646e-05	0.00203315
ENSG00000173221	4239.78	0.31669	0.0761979	4.15615	3.23661e-05	0.00206471
ENSG00000238103	1027.56	-0.38142	0.0917756	-4.15601	3.23851e-05	0.00206471
ENSG00000134779	34761.5	0.222234	0.0534724	4.15604	3.23814e-05	0.00206471
ENSG00000142676	29445.2	-0.250329	0.0603548	-4.14763	3.35939e-05	0.00213091
ENSG00000134532	795.436	0.976307	0.235389	4.14764	3.35922e-05	0.00213091
ENSG00000151320	5127.96	0.439063	0.105975	4.14307	3.42692e-05	0.00216824
ENSG00000251372	17.9951	6.14864	1.48652	4.13627	3.52997e-05	0.00222219
ENSG00000173926	661.483	0.53416	0.129132	4.13653	3.52596e-05	0.00222219
ENSG00000105227	668.96	-0.765839	0.185393	-4.13089	3.61368e-05	0.00226917
ENSG00000277228	116.7	-1.47459	0.357267	-4.12741	3.66875e-05	0.00229798
ENSG00000092470	661.524	-0.687562	0.166969	-4.1179	3.82341e-05	0.00238887
ENSG00000234975	384.268	-0.612868	0.148971	-4.11401	3.8885e-05	0.00242348
ENSG00000237994	11.112	6.44781	1.56916	4.1091	3.97209e-05	0.00246942
ENSG00000179796	1261.05	0.485891	0.118376	4.10464	4.04949e-05	0.00251128
ENSG00000164258	6208.89	-0.27304	0.0665535	-4.10257	4.08593e-05	0.00252762
ENSG00000113552	16056.5	-0.428213	0.104463	-4.09917	4.14641e-05	0.00255869
ENSG00000198420	4287.97	0.371725	0.0907733	4.09509	4.22007e-05	0.00259773
ENSG00000185551	9105.82	-0.332865	0.0814054	-4.08898	4.33281e-05	0.00266058
ENSG00000137154	99296	-0.221432	0.0542162	-4.08424	4.4221e-05	0.00270875
ENSG00000100316	168225	-0.242972	0.0595248	-4.08186	4.46759e-05	0.00272993
ENSG00000065621	436.3	-1.0574	0.259186	-4.07968	4.50981e-05	0.002749
ENSG00000124785	1292.13	0.566975	0.139278	4.07082	4.6848e-05	0.00284181
ENSG00000176399	451.764	0.927154	0.227754	4.07086	4.68408e-05	0.00284181
ENSG00000280870	151.139	3.19161	0.784379	4.06897	4.72212e-05	0.00285751
ENSG00000082898	11387.6	-0.182597	0.0448834	-4.06824	4.7369e-05	0.00285953
ENSG00000075223	4160.13	0.500025	0.12318	4.05929	4.92213e-05	0.00295707
ENSG00000196511	490.515	1.1272	0.27766	4.05964	4.91484e-05	0.00295707
ENSG00000265174	648.345	-0.588557	0.145049	-4.05764	4.95712e-05	0.00297094
ENSG00000100906	4797.01	-0.59271	0.146529	-4.04501	5.23218e-05	0.00312829
ENSG00000126016	1292.69	-0.629768	0.155732	-4.04393	5.25627e-05	0.0031352
ENSG00000259692	317.771	-0.84511	0.209663	-4.03081	5.55858e-05	0.00330762
ENSG00000196739	356.24	-0.64227	0.159556	-4.02536	5.68875e-05	0.00337704
ENSG00000031698	48687.5	-0.192737	0.0479309	-4.02114	5.79164e-05	0.00342997
ENSG00000145425	41513.7	-0.268307	0.0668107	-4.01593	5.92122e-05	0.00349842
ENSG00000164484	1330.11	0.519598	0.129542	4.01103	6.04538e-05	0.00356335
ENSG00000279074	6.91418	6.25214	1.55972	4.0085	6.11062e-05	0.00359333
ENSG00000134323	658.792	-1.02182	0.255121	-4.00524	6.19539e-05	0.00362611
ENSG00000102290	3440.98	0.42361	0.105755	4.00559	6.18617e-05	0.00362611
ENSG00000060718	5691.56	0.415796	0.103926	4.00087	6.31093e-05	0.00367652
ENSG00000112414	4114.69	-0.474061	0.11848	-4.00119	6.30235e-05	0.00367652
ENSG00000130731	4618.22	-0.205149	0.0512857	-4.00013	6.33083e-05	0.00367954
ENSG00000081818	43.2249	2.52437	0.631365	3.99828	6.38043e-05	0.00369976
ENSG00000241472	999.468	0.524521	0.131303	3.99474	6.47649e-05	0.00374677
ENSG00000170006	2551.06	-0.602235	0.151006	-3.98814	6.65923e-05	0.00383247
ENSG00000099937	8.62182	-5.58118	1.39921	-3.98882	6.64019e-05	0.00383247
ENSG00000100353	18651.9	-0.213711	0.0535919	-3.98774	6.67064e-05	0.00383247
ENSG00000123131	48553.4	-0.354232	0.0888688	-3.98601	6.71951e-05	0.00385169
ENSG00000214013	976.818	-0.697293	0.175086	-3.98258	6.81708e-05	0.00389869
ENSG00000132334	3152.9	-0.54368	0.136606	-3.97991	6.894e-05	0.00392763
ENSG00000140830	1512.53	0.473325	0.118934	3.97974	6.89913e-05	0.00392763
ENSG00000133020	101.215	1.50951	0.379473	3.97792	6.95214e-05	0.00394881
ENSG00000158470	1415.84	-0.497381	0.125219	-3.97208	7.12481e-05	0.00403771
ENSG00000150687	24723.6	0.377214	0.0950844	3.96715	7.27373e-05	0.00411279
ENSG00000135486	69893.5	-0.185128	0.0466845	-3.9655	7.32412e-05	0.00413193
ENSG00000183671	353.214	0.643593	0.162441	3.96201	7.43211e-05	0.00418341
ENSG00000168542	684.945	0.869236	0.219461	3.96077	7.47072e-05	0.00419569
ENSG00000164451	556.228	0.611641	0.154842	3.9501	7.81176e-05	0.00437739
ENSG00000204065	63.4551	-3.40923	0.863669	-3.94738	7.90108e-05	0.00441754
ENSG00000246859	1464.94	0.66071	0.167509	3.94433	8.00225e-05	0.00446412
ENSG00000123843	7.50375	-6.37743	1.61766	-3.94239	8.06722e-05	0.00449034
ENSG00000170955	396.15	1.05555	0.267957	3.93924	8.17411e-05	0.00453972
ENSG00000260804	475.428	0.806684	0.204992	3.93519	8.31313e-05	0.00460669
ENSG00000128805	261.919	0.684061	0.17406	3.93003	8.49336e-05	0.00469615
ENSG00000129194	4430.42	-0.973862	0.247836	-3.92946	8.51355e-05	0.00469692
ENSG00000186469	10673.9	0.385118	0.098069	3.92701	8.60078e-05	0.0047346
ENSG00000273015	1245.92	0.381443	0.0975443	3.91045	9.21228e-05	0.00505483
ENSG00000161249	6373.84	-0.388514	0.0993599	-3.91017	9.22297e-05	0.00505483
ENSG00000135862	5907.78	-0.389102	0.0995582	-3.90829	9.29517e-05	0.00508147
ENSG00000064490	2845.68	0.4376	0.11198	3.90785	9.31223e-05	0.00508147
ENSG00000152284	1671.28	-0.592393	0.151775	-3.90311	9.49643e-05	0.00515568
ENSG00000206567	225.219	0.819896	0.210038	3.90355	9.47914e-05	0.00515568
ENSG00000109881	4880.18	0.356844	0.091446	3.90224	9.53075e-05	0.00515568
ENSG00000120645	12.244	7.0791	1.81411	3.90225	9.5302e-05	0.00515568
ENSG00000237298	947.735	0.47944	0.123124	3.89397	9.86187e-05	0.00532328
ENSG00000265972	393.596	2.3304	0.598799	3.89179	9.95078e-05	0.00535969
ENSG00000148123	4658.2	0.474182	0.121878	3.89062	9.99889e-05	0.00537403
ENSG00000213553	692.881	-0.365716	0.0940469	-3.88865	0.000100803	0.00540613
ENSG00000197321	1726.86	-0.382731	0.0984481	-3.88764	0.000101222	0.00541702
ENSG00000189184	4400.89	-0.430581	0.110869	-3.8837	0.000102878	0.00549386
ENSG00000178567	6518.1	0.558006	0.143809	3.88019	0.000104375	0.00556189
ENSG00000154654	341.214	1.11589	0.287659	3.87921	0.000104794	0.00557239
ENSG00000187079	5104.89	-0.594048	0.153188	-3.87792	0.000105355	0.00559031
ENSG00000226862	6.1924	5.09233	1.31416	3.87496	0.000106642	0.0056435
ENSG00000108984	2767.74	0.623593	0.160945	3.87458	0.000106809	0.0056435
ENSG00000150394	6600.54	0.456235	0.117844	3.87151	0.000108163	0.005703
ENSG00000138621	2201.73	-0.580038	0.149883	-3.86993	0.000108868	0.00572804
ENSG00000065717	22.1126	-4.1153	1.06591	-3.86084	0.000112997	0.00593284
ENSG00000248673	88.5323	1.90979	0.495485	3.8544	0.000116015	0.0060669
ENSG00000248927	12.4136	-7.10664	1.84399	-3.85395	0.000116229	0.0060669
ENSG00000105880	1997.5	0.440542	0.114312	3.85384	0.000116279	0.0060669
ENSG00000169252	1962.36	-0.622662	0.161626	-3.85248	0.000116926	0.00607251
ENSG00000198168	1748.43	0.409887	0.106407	3.85209	0.000117115	0.00607251
ENSG00000124151	4432.58	-0.565497	0.146801	-3.85212	0.0001171	0.00607251
ENSG00000173559	36389.8	-0.672428	0.174771	-3.84749	0.000119335	0.00614934
ENSG00000156475	3027.53	0.409421	0.106385	3.84847	0.000118857	0.00614934
ENSG00000142396	1180.85	0.502076	0.130494	3.8475	0.00011933	0.00614934
ENSG00000290704	37.7815	-1.91217	0.498473	-3.83606	0.000125024	0.00642924
ENSG00000082153	42043.4	0.179476	0.046819	3.8334	0.000126386	0.00648591
ENSG00000123130	5995.29	-0.305755	0.0797849	-3.83224	0.000126983	0.00650317
ENSG00000244968	115.35	1.19184	0.311084	3.83126	0.000127491	0.00651587
ENSG00000115107	360.08	-1.31291	0.342939	-3.82841	0.000128976	0.0065783
ENSG00000213760	2811.69	0.368152	0.0962325	3.82565	0.000130426	0.00663871
ENSG00000166741	224.501	-1.1735	0.307286	-3.81894	0.000134029	0.00680822
ENSG00000159871	113.314	-2.52477	0.66123	-3.8183	0.000134376	0.006812
ENSG00000178234	14351.4	-0.522238	0.136879	-3.81534	0.000135998	0.00686639
ENSG00000165799	6.10021	-6.08336	1.59439	-3.81547	0.000135924	0.00686639
ENSG00000286163	9.04753	-5.66282	1.48554	-3.81195	0.000137875	0.00694714
ENSG00000246695	354.484	0.766958	0.201239	3.81118	0.000138302	0.00695464
ENSG00000236106	186.248	0.868428	0.227893	3.81068	0.000138584	0.00695481
ENSG00000075785	29009.2	-0.266293	0.0699744	-3.80558	0.000141472	0.0070855
ENSG00000229117	21431.6	-0.257207	0.0676015	-3.80475	0.00014195	0.00709523
ENSG00000168243	4966.63	0.328677	0.0865962	3.79552	0.000147335	0.00734969
ENSG00000282164	73.8109	2.34468	0.618117	3.79325	0.000148685	0.00738756
ENSG00000241015	2854.34	0.61404	0.161858	3.79369	0.000148422	0.00738756
ENSG00000052802	44625.8	-0.483546	0.127509	-3.79227	0.000149278	0.0074023
ENSG00000197756	27873.4	-0.30816	0.0813077	-3.79005	0.000150616	0.00745385
ENSG00000228010	24.4044	-1.76246	0.465333	-3.78753	0.000152155	0.00751515
ENSG00000272086	35.1594	2.578	0.680912	3.7861	0.00015303	0.00754342
ENSG00000289575	28.1901	2.31608	0.612288	3.78266	0.000155162	0.00761901
ENSG00000171858	11451.7	-0.289986	0.0766622	-3.78264	0.000155173	0.00761901
ENSG00000189108	64.1317	3.63606	0.962	3.77968	0.000157027	0.00769496
ENSG00000126895	5.66589	-5.97534	1.5813	-3.77874	0.000157621	0.00770895
ENSG00000224184	73.4133	1.42218	0.376444	3.77793	0.000158139	0.00771916
ENSG00000140382	4503.61	0.593777	0.157274	3.77543	0.000159731	0.00778168
ENSG00000175489	18.8489	6.72722	1.78312	3.77273	0.000161471	0.00785112
ENSG00000185008	1899.22	0.529897	0.14058	3.76935	0.000163671	0.00794266
ENSG00000111843	18837	0.218074	0.0578727	3.76816	0.000164454	0.0079652
ENSG00000164442	2961.24	-0.357711	0.0950313	-3.76414	0.000167123	0.00807878
ENSG00000174842	4018.18	0.540284	0.143704	3.75971	0.000170107	0.00817561
ENSG00000139910	2029.85	0.531557	0.14135	3.76058	0.000169523	0.00817561
ENSG00000070915	11.9631	-7.05346	1.87586	-3.76012	0.000169832	0.00817561
ENSG00000204428	239.295	0.823658	0.219233	3.75699	0.000171966	0.0082491
ENSG00000101197	13.3786	-7.21464	1.9214	-3.75489	0.000173415	0.00830267
ENSG00000261587	18.4997	-4.03943	1.07628	-3.75314	0.000174631	0.0083449
ENSG00000143217	963.507	-1.2011	0.320352	-3.74932	0.000177318	0.00845713
ENSG00000257261	698.823	0.572456	0.152703	3.74882	0.000177666	0.00845756
ENSG00000150457	984.346	-0.71696	0.191329	-3.74726	0.000178779	0.00849439
ENSG00000248329	3085.8	-0.435879	0.116463	-3.74265	0.00018209	0.00861894
ENSG00000105989	70.5243	-3.52659	0.942162	-3.74308	0.000181778	0.00861894
ENSG00000211772	7086.64	-0.406994	0.10878	-3.74143	0.000182974	0.00864439
ENSG00000120937	12220.8	-0.46542	0.124566	-3.73634	0.000186721	0.00880477
ENSG00000111860	7119.51	-0.294806	0.079024	-3.73059	0.000191033	0.00899112
ENSG00000188868	1126.6	0.488082	0.130903	3.72859	0.000192557	0.00904582
ENSG00000160229	2489.17	0.537136	0.144258	3.72343	0.000196535	0.00921537
ENSG00000171786	1251.66	0.487701	0.131014	3.72251	0.000197252	0.00923167
ENSG00000163017	484.234	-0.929036	0.249917	-3.71738	0.000201301	0.00940359
ENSG00000165323	1993.85	0.635328	0.170932	3.71684	0.000201731	0.00940607
ENSG00000137101	27.7421	-3.34855	0.901493	-3.71445	0.000203643	0.00947756
ENSG00000225265	888.198	0.509865	0.137364	3.71178	0.000205807	0.00954273
ENSG00000102401	9644.96	0.328422	0.0884781	3.7119	0.000205708	0.00954273
ENSG00000171056	266.603	-1.41432	0.381181	-3.71036	0.000206966	0.00957869
ENSG00000205642	5.52102	-4.06899	1.09747	-3.7076	0.000209229	0.00966552
ENSG00000140718	9725.72	0.357198	0.0963551	3.7071	0.000209643	0.00966679
ENSG00000087495	1939.61	-0.501118	0.135237	-3.70547	0.000210997	0.00971129
ENSG00000254560	217.656	-0.941161	0.254065	-3.70441	0.000211886	0.00973427
ENSG00000183625	4394.79	0.457283	0.123528	3.70187	0.000214017	0.00979618
ENSG00000033327	548.956	-0.6908	0.18659	-3.70224	0.000213706	0.00979618
ENSG00000123901	2001.81	0.670571	0.181451	3.6956	0.000219367	0.0100227
ENSG00000288818	127.559	1.00954	0.27325	3.69457	0.000220263	0.0100453
ENSG00000142937	27238.8	-0.235134	0.0636774	-3.69258	0.00022199	0.0101056
ENSG00000140105	24443.5	-0.24256	0.0658046	-3.68607	0.000227744	0.0103487
ENSG00000156711	1274.05	-0.814543	0.221617	-3.67545	0.000237427	0.0107691
ENSG00000198756	234.047	1.73218	0.471766	3.67168	0.000240958	0.0109094
ENSG00000147488	1638.88	0.608781	0.165881	3.66998	0.000242572	0.0109492
ENSG00000196935	2541.67	0.592072	0.161335	3.66983	0.000242712	0.0109492
ENSG00000232445	682.215	-0.51705	0.140923	-3.66902	0.000243479	0.010964
ENSG00000114450	9336.93	-0.241287	0.0657999	-3.66699	0.000245422	0.0110317
ENSG00000071082	43639.3	-0.209411	0.0571759	-3.66258	0.000249691	0.0112034
ENSG00000116761	3262.76	-0.332919	0.0909677	-3.65974	0.000252467	0.0113069
ENSG00000272369	87.2321	0.748152	0.204452	3.6593	0.000252903	0.0113069
ENSG00000286739	18.1866	-2.65348	0.725269	-3.65862	0.000253578	0.0113168
ENSG00000074935	1900.19	-0.476728	0.130394	-3.65606	0.000256125	0.0114039
ENSG00000256417	9.64632	-3.48083	0.952154	-3.65574	0.000256443	0.0114039
ENSG00000075407	2093.09	-0.910921	0.249208	-3.65526	0.000256922	0.011405
ENSG00000224578	527.456	-0.348247	0.0954205	-3.6496	0.000262645	0.0116383
ENSG00000103490	565.386	-0.602346	0.165105	-3.64826	0.000264018	0.0116785
ENSG00000138646	7238.44	-0.341662	0.0937411	-3.64474	0.000267661	0.0118085
ENSG00000106804	2963.41	-0.5675	0.155733	-3.64406	0.000268375	0.0118085
ENSG00000286110	147.265	0.613811	0.168424	3.64444	0.000267974	0.0118085
ENSG00000235152	53.412	-1.75343	0.481668	-3.64032	0.000272299	0.011954
ENSG00000286522	6.81804	-3.84927	1.05749	-3.64	0.000272638	0.011954
ENSG00000122026	55986.3	-0.227899	0.0626492	-3.6377	0.000275087	0.0120352
ENSG00000020577	740.228	-0.54639	0.150216	-3.63735	0.000275453	0.0120352
ENSG00000198358	12.019	-4.19711	1.15413	-3.63661	0.000276246	0.0120488
ENSG00000115268	41167.4	-0.218719	0.0601531	-3.63603	0.000276868	0.0120549
ENSG00000239636	25.964	1.83373	0.504395	3.63549	0.000277449	0.0120591
ENSG00000162302	51.3024	-1.16722	0.321431	-3.63133	0.000281966	0.0122342
ENSG00000289155	55.6057	1.70428	0.469787	3.62778	0.000285872	0.0123822
ENSG00000138095	24692.9	-0.255301	0.0704181	-3.62551	0.000288396	0.0124699
ENSG00000072210	5403.39	0.246725	0.0681312	3.62132	0.000293102	0.0126515
ENSG00000198739	554.036	0.871141	0.240693	3.6193	0.000295403	0.0127288
ENSG00000139291	1503.23	0.457911	0.126682	3.61464	0.000300766	0.0129376
ENSG00000128791	16913.4	0.305494	0.0845664	3.61247	0.000303292	0.0130238
ENSG00000204128	277.089	-1.3082	0.362244	-3.61138	0.00030457	0.0130339
ENSG00000186767	8876.82	0.639485	0.177057	3.61175	0.000304143	0.0130339
ENSG00000046653	9362.28	0.381017	0.105544	3.61001	0.00030618	0.013037
ENSG00000103811	753.058	-0.843456	0.233645	-3.60999	0.000306206	0.013037
ENSG00000261868	20.7876	-3.24876	0.899823	-3.61045	0.000305668	0.013037
ENSG00000264304	17.3518	2.00602	0.555936	3.60836	0.000308136	0.0130968
ENSG00000170445	16584.2	0.371333	0.102944	3.60713	0.000309608	0.013137
ENSG00000260442	166.656	-0.611962	0.16974	-3.6053	0.000311794	0.0132074
ENSG00000124107	74.8004	-2.18265	0.605587	-3.60419	0.000313122	0.0132412
ENSG00000153774	3671.97	-0.377376	0.104731	-3.60328	0.000314227	0.0132655
ENSG00000118181	30615.7	-0.2655	0.073755	-3.59976	0.000318513	0.0134011
ENSG00000173465	2509.79	-0.274405	0.0762196	-3.60018	0.000317993	0.0134011
ENSG00000164305	35173.5	0.382478	0.106393	3.59494	0.000324461	0.0136285
ENSG00000204442	1501.13	0.825139	0.229756	3.59137	0.000328939	0.0137934
ENSG00000276600	887.281	0.830984	0.231616	3.58776	0.000333526	0.0138349
ENSG00000172059	365.073	-0.937197	0.261217	-3.58781	0.000333462	0.0138349
ENSG00000184261	79.9009	-1.2994	0.362046	-3.58905	0.000331889	0.0138349
ENSG00000170381	1200.15	0.936623	0.260931	3.58954	0.000331264	0.0138349
ENSG00000077279	28242.8	0.511551	0.142502	3.58978	0.000330962	0.0138349
ENSG00000131264	11.275	6.96039	1.94015	3.58755	0.000333804	0.0138349
ENSG00000172164	464.96	-1.03104	0.287378	-3.58776	0.000333534	0.0138349
ENSG00000150471	2989.81	0.552782	0.154122	3.58666	0.000334936	0.0138588
ENSG00000163827	9.77927	-6.76271	1.88706	-3.58372	0.000338731	0.0139927
ENSG00000137502	2780.82	0.455712	0.127178	3.58325	0.00033934	0.0139947
ENSG00000124143	124.113	-2.63623	0.736148	-3.58111	0.00034214	0.0140812
ENSG00000197044	1247.52	0.658835	0.183992	3.58078	0.000342564	0.0140812
ENSG00000108384	7795.39	0.36804	0.102865	3.5779	0.000346363	0.014214
ENSG00000035141	14972.3	0.323171	0.0904075	3.5746	0.000350758	0.0143707
ENSG00000174695	25881.1	0.255923	0.0716225	3.57321	0.000352629	0.0144237
ENSG00000123975	12265.4	-0.41955	0.117496	-3.57076	0.00035595	0.0145358
ENSG00000234268	7.23955	-3.58324	1.0042	-3.56827	0.000359345	0.0146028
ENSG00000166206	4468.27	0.447376	0.125368	3.56852	0.000359007	0.0146028
ENSG00000108691	2893.5	-0.656944	0.18407	-3.569	0.00035835	0.0146028
ENSG00000175426	3133.29	0.719605	0.201809	3.56577	0.000362791	0.0147189
ENSG00000138821	2731.31	0.573134	0.160848	3.56319	0.000366373	0.0148402
ENSG00000143942	1060.67	0.345599	0.0970492	3.56107	0.00036935	0.0148789
ENSG00000204386	9809.24	-0.538547	0.151243	-3.56081	0.00036971	0.0148789
ENSG00000278716	10.3411	-6.84146	1.9208	-3.56178	0.000368354	0.0148789
ENSG00000170558	4690.69	0.402925	0.113133	3.56153	0.000368705	0.0148789
ENSG00000196604	79.3327	1.6393	0.461159	3.55474	0.000378358	0.0152025
ENSG00000223552	130.223	-1.40821	0.396523	-3.55139	0.000383198	0.0153492
ENSG00000147255	967.77	0.623605	0.175596	3.55136	0.000383239	0.0153492
ENSG00000270255	5.42614	-5.90959	1.66519	-3.54889	0.000386858	0.0154694
ENSG00000069812	1106.61	-0.757646	0.213686	-3.54561	0.000391709	0.0156134
ENSG00000288770	20.8876	1.85469	0.523055	3.54589	0.000391293	0.0156134
ENSG00000023734	46357.8	0.225283	0.0635591	3.54447	0.000393407	0.0156561
ENSG00000106266	1892.26	-0.400386	0.113091	-3.5404	0.000399521	0.0158741
ENSG00000104413	12296.8	-0.280767	0.0793262	-3.5394	0.000401041	0.0159092
ENSG00000145687	12694.3	0.281265	0.0794954	3.53814	0.000402961	0.0159601
ENSG00000176406	2601.97	0.548082	0.155099	3.53376	0.000409699	0.0161344
ENSG00000165304	19019.2	-0.311812	0.0882422	-3.5336	0.000409944	0.0161344
ENSG00000087258	1043.35	0.451145	0.127654	3.53413	0.000409127	0.0161344
ENSG00000159228	4584.18	-0.486386	0.137618	-3.53432	0.000408822	0.0161344
ENSG00000054793	1500.32	0.557774	0.157894	3.53258	0.000411529	0.0161713
ENSG00000170791	5744.23	0.405732	0.114933	3.53016	0.000415306	0.0162941
ENSG00000167220	257.409	0.447019	0.126648	3.52963	0.000416139	0.0163012
ENSG00000143321	2848.97	-0.319844	0.0906582	-3.52802	0.000418685	0.0163753
ENSG00000265750	23.4468	1.70434	0.48338	3.52588	0.000422071	0.0164819
ENSG00000213442	2169.84	-0.224236	0.0636431	-3.52334	0.000426146	0.016615
ENSG00000183579	905.985	-0.454319	0.129025	-3.52118	0.000429628	0.0167247
ENSG00000156976	39807.3	-0.315155	0.0895232	-3.52038	0.000430932	0.0167494
ENSG00000114480	5494.19	0.29072	0.0826228	3.51865	0.000433756	0.0168069
ENSG00000114200	3505.56	0.672558	0.19113	3.51884	0.000433433	0.0168069
ENSG00000165072	6771.18	0.901372	0.256275	3.5172	0.000436121	0.0168723
ENSG00000092969	381.713	1.09086	0.310385	3.51454	0.000440522	0.0170163
ENSG00000198826	1305.25	-0.446602	0.127135	-3.51283	0.000443363	0.0170996
ENSG00000116898	10885.5	-0.216002	0.0615115	-3.51158	0.000445459	0.017154
ENSG00000113805	64.5747	-2.75955	0.786072	-3.51056	0.000447171	0.0171934
ENSG00000170270	2657.56	0.405048	0.115546	3.50552	0.000455716	0.0174682
ENSG00000101670	1285.24	-1.17928	0.336392	-3.50568	0.000455441	0.0174682
ENSG00000149294	3993.58	0.569192	0.162408	3.50469	0.000457131	0.0174688
ENSG00000124091	16.2569	-2.06988	0.590585	-3.5048	0.000456955	0.0174688
ENSG00000006377	620.889	0.709274	0.202551	3.50171	0.000462282	0.0176387
ENSG00000285748	17.4144	6.10109	1.74314	3.50006	0.000465155	0.0177213
ENSG00000124145	13018.1	-0.297248	0.0849503	-3.49908	0.000466874	0.0177597
ENSG00000138172	155.008	-1.6274	0.465455	-3.49636	0.00047165	0.0179141
ENSG00000173757	493.454	-0.836573	0.239332	-3.49545	0.000473269	0.0179483
ENSG00000189046	1060.37	-0.588563	0.168407	-3.49488	0.000474279	0.0179594
ENSG00000136231	16109.3	-0.197141	0.056541	-3.48668	0.00048905	0.0184907
ENSG00000223361	406.26	-0.517794	0.148583	-3.48487	0.000492372	0.0185601
ENSG00000106278	2591.88	0.470305	0.134956	3.48488	0.000492367	0.0185601
ENSG00000095794	8689.23	0.261895	0.075162	3.48441	0.000493221	0.0185641
ENSG00000247317	407.883	-0.734143	0.210724	-3.48391	0.000494146	0.018571
ENSG00000137203	7966.33	-0.649549	0.186543	-3.48203	0.000497635	0.018674
ENSG00000105929	251.365	-1.22933	0.353153	-3.481	0.000499536	0.0187173
ENSG00000157005	12543.1	0.473159	0.136006	3.47896	0.000503367	0.0188325
ENSG00000126950	1213.93	0.695659	0.20009	3.47673	0.000507559	0.018961
ENSG00000114796	8319.49	-0.401444	0.115543	-3.47439	0.000512008	0.0190987
ENSG00000046604	14334.9	-0.293467	0.0844777	-3.4739	0.000512957	0.0191055
ENSG00000281404	79.6428	-1.11874	0.322515	-3.46879	0.000522817	0.0194438
ENSG00000177410	1809.44	-0.389068	0.112586	-3.45575	0.000548767	0.0203551
ENSG00000099860	1857.21	0.440564	0.127491	3.45566	0.00054895	0.0203551
ENSG00000170624	38.3613	2.24693	0.651131	3.45081	0.000558904	0.0206629
ENSG00000288597	41.9242	-3.07307	0.890454	-3.45112	0.000558261	0.0206629
ENSG00000115947	13682.2	0.367638	0.106692	3.4458	0.000569377	0.021019
ENSG00000280511	95.7807	-0.939919	0.27292	-3.44393	0.000573316	0.0211332
ENSG00000137270	90.6925	-2.5038	0.727219	-3.44297	0.000575353	0.0211459
ENSG00000149313	16330.5	0.273157	0.0793352	3.44307	0.000575154	0.0211459
ENSG00000107651	6801.19	0.422395	0.12271	3.44221	0.000576975	0.0211521
ENSG00000196476	1328.02	0.463692	0.134712	3.4421	0.000577213	0.0211521
ENSG00000134262	792.268	0.545819	0.158642	3.44058	0.000580469	0.0212092
ENSG00000126733	1370.27	0.540358	0.157043	3.44083	0.000579929	0.0212092
ENSG00000178662	1223.46	0.441699	0.128476	3.43798	0.000586074	0.0213827
ENSG00000273365	7.43501	-5.37333	1.56381	-3.43606	0.000590243	0.0215034
ENSG00000140945	2212.89	0.597818	0.174008	3.43558	0.000591292	0.0215103
ENSG00000161960	275.791	-0.51903	0.151182	-3.43315	0.000596617	0.0216724
ENSG00000249484	9.71554	-6.7532	1.9681	-3.43133	0.000600636	0.0217868
ENSG00000155903	3194.37	-0.497943	0.145283	-3.42741	0.000609367	0.0220715
ENSG00000242193	46.5898	3.88523	1.13493	3.42332	0.000618604	0.0223413
ENSG00000176244	2057.45	0.426857	0.124679	3.42364	0.000617889	0.0223413
ENSG00000237525	14.124	6.3075	1.84386	3.42082	0.000624316	0.022515
ENSG00000168734	2550.56	0.281959	0.0825131	3.41714	0.000632817	0.0227887
ENSG00000249150	94.4982	1.37281	0.401997	3.41498	0.000637869	0.0229376
ENSG00000138448	10745.1	0.355885	0.104256	3.41357	0.000641175	0.0230233
ENSG00000114446	6391.41	0.303449	0.0889115	3.41293	0.000642678	0.0230442
ENSG00000279791	10.8443	4.44609	1.30395	3.40971	0.000650324	0.0232516
ENSG00000184530	18.6936	2.69409	0.790062	3.40998	0.000649681	0.0232516
ENSG00000102172	41152.9	-0.180238	0.0528802	-3.40843	0.000653375	0.0232609
ENSG00000103769	28195.7	-0.171854	0.0504203	-3.40843	0.000653371	0.0232609
ENSG00000129673	19.2129	4.52929	1.32875	3.40868	0.000652777	0.0232609
ENSG00000107745	4685.79	-0.321963	0.0944776	-3.40782	0.000654835	0.0232797
ENSG00000144451	4823.13	0.246062	0.0722339	3.40646	0.000658114	0.023363
ENSG00000211764	164.196	-0.720956	0.211673	-3.40598	0.000659263	0.0233706
ENSG00000178695	1478.96	0.712113	0.209157	3.40467	0.000662432	0.0234491
ENSG00000136404	134.564	-0.929674	0.273089	-3.40429	0.000663352	0.0234491
ENSG00000234224	597.791	0.797762	0.234442	3.40282	0.000666948	0.0235097
ENSG00000270878	9.25786	-6.68358	1.96393	-3.40316	0.000666122	0.0235097
ENSG00000188984	55.9271	-4.01355	1.17979	-3.40191	0.000669167	0.0235547
ENSG00000286736	6.40244	-5.15688	1.51947	-3.39387	0.000689131	0.0242233
ENSG00000127920	2170.63	0.46372	0.136737	3.39132	0.000695567	0.0244152
ENSG00000266385	4.01203	-5.47781	1.61587	-3.39001	0.000698904	0.0244979
ENSG00000203546	24.0069	-1.36209	0.401883	-3.38928	0.000700774	0.0245291
ENSG00000282048	1323.25	-0.586253	0.173039	-3.38798	0.000704101	0.0245767
ENSG00000125355	1038.83	0.686126	0.202517	3.38798	0.00070409	0.0245767
ENSG00000248605	145.617	-0.914033	0.270074	-3.38438	0.000713403	0.024832
ENSG00000147124	568.328	-1.08806	0.32149	-3.38442	0.000713281	0.024832
ENSG00000072657	273.519	1.30327	0.385726	3.37875	0.00072817	0.0253108
ENSG00000198355	501.26	-0.826864	0.244797	-3.37775	0.000730821	0.0253676
ENSG00000289165	7.96252	3.14885	0.932692	3.37609	0.000735233	0.0254501
ENSG00000026559	215.241	-1.12795	0.334089	-3.37619	0.000734966	0.0254501
ENSG00000185247	19.5215	5.88757	1.74468	3.37458	0.00073929	0.025545
ENSG00000065618	2421.18	-0.326634	0.0968004	-3.37431	0.000740019	0.025545
ENSG00000151617	267.15	0.910623	0.270157	3.37072	0.000749715	0.0257375
ENSG00000204261	15.3448	-3.17655	0.94215	-3.37159	0.000747353	0.0257375
ENSG00000255496	13.0206	2.27533	0.674982	3.37095	0.000749103	0.0257375
ENSG00000242259	2566.49	-0.281266	0.083443	-3.37075	0.00074963	0.0257375
ENSG00000220581	4.23446	5.55352	1.64802	3.36981	0.000752207	0.0257523
ENSG00000227383	6.17438	-5.10474	1.51476	-3.37	0.00075168	0.0257523
ENSG00000104381	10711.7	0.347603	0.103258	3.36636	0.000761661	0.0260403
ENSG00000179059	11624.7	-0.47346	0.140681	-3.36549	0.000764067	0.0260868
ENSG00000289867	5.95157	-3.07017	0.913739	-3.36	0.000779413	0.0265745
ENSG00000288822	9.11438	-6.65984	1.98233	-3.3596	0.000780558	0.0265773
ENSG00000287692	8.24449	-6.51597	1.94217	-3.355	0.000793655	0.0269864
ENSG00000221887	90.3822	-1.09543	0.326703	-3.353	0.00079941	0.0271452
ENSG00000138757	45859.1	0.299417	0.0893528	3.35095	0.000805353	0.0272885
ENSG00000236552	992.15	-0.302914	0.0904008	-3.35079	0.000805815	0.0272885
ENSG00000155090	2024.88	-0.513228	0.153211	-3.34981	0.000808658	0.0273432
ENSG00000185201	4179.81	-0.292979	0.0874699	-3.34949	0.000809616	0.0273432
ENSG00000115204	5735.32	-0.290699	0.0868163	-3.34844	0.000812688	0.0273729
ENSG00000106153	11540.9	0.373636	0.111584	3.34849	0.000812534	0.0273729
ENSG00000108506	1895.46	0.425798	0.127182	3.34794	0.000814145	0.0273851
ENSG00000248206	26.5979	2.80492	0.837956	3.34734	0.000815908	0.0274075
ENSG00000148584	50.9997	2.66243	0.795928	3.34506	0.000822638	0.0275965
ENSG00000256223	1375.39	0.466889	0.139693	3.34226	0.000830999	0.0278396
ENSG00000065923	1202.9	-0.499071	0.149387	-3.34079	0.00083541	0.0279499
ENSG00000162694	7233.01	0.416277	0.124687	3.33857	0.000842106	0.0280159
ENSG00000144802	328.058	0.953318	0.285603	3.33791	0.00084411	0.0280159
ENSG00000270021	12.1904	6.09169	1.82425	3.33929	0.000839925	0.0280159
ENSG00000204706	171.56	1.18103	0.353756	3.33856	0.000842135	0.0280159
ENSG00000150093	33667.7	0.236609	0.0708764	3.33833	0.000842825	0.0280159
ENSG00000130164	1467.16	-0.699348	0.209516	-3.33792	0.000844083	0.0280159
ENSG00000112249	16203.4	0.289217	0.0866856	3.3364	0.000848723	0.0281317
ENSG00000115919	428.683	0.813539	0.243893	3.33564	0.000851023	0.0281706
ENSG00000064652	3328.98	-0.276917	0.0830928	-3.33262	0.00086031	0.0284403
ENSG00000286964	202.541	1.23292	0.370203	3.3304	0.000867215	0.0285929
ENSG00000137673	8.82381	-6.61424	1.98595	-3.33051	0.00086686	0.0285929
ENSG00000119403	379.847	-0.54125	0.162629	-3.32812	0.000874352	0.0287532
ENSG00000034713	9521.34	0.281267	0.0845125	3.32811	0.000874377	0.0287532
ENSG00000083307	2247.63	-0.481763	0.144803	-3.32702	0.000877809	0.0288281
ENSG00000178222	610.902	-0.708859	0.213242	-3.3242	0.000886737	0.0290831
ENSG00000102078	914.713	0.413724	0.124589	3.32072	0.000897851	0.029409
ENSG00000184408	61.945	2.25651	0.679876	3.319	0.000903401	0.0295135
ENSG00000167065	281.496	0.614466	0.185118	3.31933	0.000902341	0.0295135
ENSG00000007171	357.69	-1.29672	0.390841	-3.31778	0.000907357	0.029604
ENSG00000143850	616.631	-0.811977	0.244836	-3.31641	0.000911826	0.029711
ENSG00000166024	3431.84	0.273362	0.0824634	3.31495	0.000916583	0.0298272
ENSG00000105048	3388.72	-0.414656	0.125116	-3.31416	0.000919182	0.0298728
ENSG00000147526	13420.1	-0.642924	0.194017	-3.31375	0.000920534	0.0298779
ENSG00000255559	6.21854	-5.11616	1.5444	-3.31273	0.000923915	0.0299488
ENSG00000120705	21062.7	-0.208903	0.0630716	-3.31216	0.000925801	0.029971
ENSG00000233927	6037.52	-0.340488	0.102842	-3.3108	0.000930305	0.0300778
ENSG00000286427	8.30006	6.52099	1.97028	3.30968	0.000934039	0.0301596
ENSG00000203857	88.8138	-2.79528	0.845299	-3.30685	0.000943511	0.0303882
ENSG00000065150	19822.7	-0.183416	0.0554656	-3.30684	0.000943553	0.0303882
ENSG00000167257	781.08	-0.499599	0.151116	-3.30606	0.000946166	0.0304332
ENSG00000100814	6367.02	-0.31161	0.0942691	-3.30554	0.000947944	0.0304512
ENSG00000104267	14427.6	0.434169	0.131397	3.30426	0.000952268	0.0305508
ENSG00000100139	519.283	-0.838578	0.253865	-3.30324	0.000955744	0.030623
ENSG00000158427	355.427	0.541337	0.163915	3.30256	0.000958074	0.0306584
ENSG00000227081	905.069	-0.394626	0.11968	-3.29734	0.000976045	0.0311935
ENSG00000227097	174.927	-0.561175	0.170368	-3.29389	0.000988115	0.0315389
ENSG00000131389	1507.56	-1.08089	0.328197	-3.29343	0.000989744	0.0315506
ENSG00000272677	206.094	0.616525	0.18729	3.29182	0.000995423	0.0316069
ENSG00000021355	1272.61	-0.573007	0.174035	-3.29247	0.000993101	0.0316069
ENSG00000128512	1346.3	0.559568	0.170004	3.29149	0.00099657	0.0316069
ENSG00000086506	376.007	-0.542242	0.164711	-3.29209	0.000994475	0.0316069
ENSG00000198517	10.1045	-2.40246	0.730178	-3.29024	0.001001	0.0317074
ENSG00000179299	809.513	-0.565181	0.171804	-3.28968	0.00100302	0.031731
ENSG00000008056	46.2028	1.82235	0.554621	3.28577	0.00101705	0.0321102
ENSG00000063046	15300.5	-0.471459	0.143492	-3.28562	0.00101758	0.0321102
ENSG00000250986	12.2687	-3.6029	1.09678	-3.28497	0.00101995	0.0321445
ENSG00000162869	2153.92	0.524149	0.159732	3.28143	0.00103282	0.0324861
ENSG00000280118	17.9987	7.63502	2.32684	3.28128	0.00103339	0.0324861
ENSG00000177694	463.73	1.04475	0.318493	3.28028	0.00103704	0.0325598
ENSG00000108298	43698.2	-0.202878	0.0619639	-3.27413	0.00105988	0.0332351
ENSG00000215866	53.2083	-2.45395	0.751191	-3.26675	0.00108791	0.0340716
ENSG00000222041	3547.19	-0.339069	0.103852	-3.26493	0.0010949	0.0342476
ENSG00000111405	221.886	1.30553	0.400045	3.26347	0.00110058	0.0343821
ENSG00000236028	105.132	-1.10231	0.337854	-3.26269	0.00110361	0.0344338
ENSG00000120658	358.665	0.923165	0.283471	3.25664	0.00112737	0.0351313
ENSG00000064313	8542.06	0.375492	0.115373	3.2546	0.00113553	0.0353414
ENSG00000018408	1805.4	0.491216	0.151007	3.25294	0.00114216	0.0355037
ENSG00000259663	491.857	0.619596	0.190537	3.25184	0.00114662	0.0355098
ENSG00000047579	1387.04	0.375735	0.115544	3.25188	0.00114644	0.0355098
ENSG00000181856	83.8885	-1.5553	0.478269	-3.25192	0.00114627	0.0355098
ENSG00000164815	4932.48	0.337422	0.103812	3.25031	0.00115278	0.0356562
ENSG00000154645	173.168	1.38662	0.426666	3.2499	0.00115444	0.0356634
ENSG00000135842	524.064	-0.830846	0.255752	-3.24864	0.0011596	0.0357344
ENSG00000172159	2174.15	0.343732	0.105807	3.24866	0.00115952	0.0357344
ENSG00000165030	434.415	-0.944248	0.291785	-3.23611	0.00121169	0.0372479
ENSG00000100234	7947.32	-0.463178	0.143116	-3.23638	0.00121055	0.0372479
ENSG00000168386	2247.82	0.544775	0.168519	3.23273	0.00122613	0.0376455
ENSG00000182134	1773.49	-0.428044	0.13287	-3.22153	0.00127508	0.0388789
ENSG00000249307	486.744	-0.500407	0.155355	-3.22106	0.00127719	0.0388789
ENSG00000113356	855.801	-0.876798	0.27208	-3.22257	0.00127046	0.0388789
ENSG00000124942	2648.8	-0.733171	0.22759	-3.22146	0.00127541	0.0388789
ENSG00000175183	10594.2	0.306751	0.0951846	3.2227	0.00126989	0.0388789
ENSG00000137872	4832.73	0.281087	0.0872569	3.22137	0.0012758	0.0388789
ENSG00000196859	6.52049	5.17279	1.60561	3.22169	0.00127437	0.0388789
ENSG00000091409	2103.38	-0.465507	0.144632	-3.21856	0.00128834	0.0391705
ENSG00000175984	590.642	0.737786	0.229406	3.21608	0.00129956	0.0394159
ENSG00000162188	1622.63	0.524396	0.16305	3.21616	0.00129916	0.0394159
ENSG00000139826	4448.99	0.331098	0.103033	3.21351	0.00131123	0.0396735
ENSG00000175106	635.816	-0.533383	0.165967	-3.21379	0.00130996	0.0396735
ENSG00000223715	279.262	0.859667	0.267608	3.21241	0.00131628	0.0397361
ENSG00000101680	4294.92	-0.449014	0.139777	-3.21236	0.00131648	0.0397361
ENSG00000243317	15185.9	0.265778	0.0828745	3.207	0.00134128	0.0404357
ENSG00000187815	78.5962	-1.80386	0.562631	-3.20612	0.00134539	0.0405109
ENSG00000163297	760.414	0.516673	0.161211	3.20495	0.00135087	0.0406269
ENSG00000088682	1065.43	-0.452351	0.141167	-3.20436	0.00135361	0.0406605
ENSG00000291044	5.01764	-4.80232	1.49901	-3.20366	0.00135691	0.0407106
ENSG00000174564	551.638	-0.663769	0.207327	-3.20156	0.00136687	0.0409602
ENSG00000103489	264.343	0.689309	0.215475	3.19902	0.00137894	0.0412723
ENSG00000148303	22461.5	-0.297094	0.092891	-3.19831	0.00138237	0.0413255
ENSG00000066926	3756.14	0.383691	0.120057	3.19591	0.0013939	0.0416206
ENSG00000068781	59.7783	1.00981	0.31611	3.19448	0.00140083	0.0417774
ENSG00000177675	396.158	1.05447	0.33055	3.19005	0.00142246	0.0423721
ENSG00000106078	697.091	-0.478042	0.149904	-3.189	0.00142766	0.0424764
ENSG00000265096	7.30518	-6.33991	1.98853	-3.18824	0.00143144	0.0425181
ENSG00000101162	5.84754	-5.01071	1.57173	-3.18803	0.00143247	0.0425181
ENSG00000164463	771.432	-0.849705	0.266602	-3.18717	0.00143672	0.0425937
ENSG00000273373	85.8958	-1.36728	0.429317	-3.18479	0.0014486	0.0428806
ENSG00000152192	661.208	0.73134	0.229653	3.18454	0.00144983	0.0428806
ENSG00000100300	989.498	-0.968351	0.304115	-3.18416	0.00145176	0.0428869
ENSG00000004866	2131.68	0.340248	0.106875	3.18361	0.00145451	0.0429175
ENSG00000258548	310.362	1.25662	0.395067	3.18078	0.0014688	0.043288
ENSG00000115750	2470.66	-0.368223	0.115798	-3.17987	0.00147342	0.0433731
ENSG00000171843	1796.68	0.516386	0.162467	3.17841	0.00148083	0.04354
ENSG00000088247	1311.36	-0.314105	0.0988423	-3.17784	0.00148377	0.0435749
ENSG00000226887	656.767	0.608883	0.191672	3.1767	0.00148963	0.0436959
ENSG00000170385	1312.24	-0.478388	0.150625	-3.17603	0.00149307	0.0437455
ENSG00000268964	54.2239	-2.65344	0.83625	-3.17302	0.00150861	0.044149
ENSG00000150593	4715.32	-0.393579	0.124063	-3.17241	0.00151177	0.0441897
ENSG00000229021	6.31306	-2.60547	0.821574	-3.17131	0.00151753	0.0442028
ENSG00000243667	179.712	0.632836	0.199544	3.17141	0.00151699	0.0442028
ENSG00000280739	118.295	2.37252	0.74808	3.17148	0.00151667	0.0442028
ENSG00000291091	610.715	0.346192	0.109209	3.17	0.00152437	0.0443506
ENSG00000137843	390.745	-0.897048	0.283067	-3.16903	0.00152948	0.0444473
ENSG00000233189	22.3883	-2.16106	0.682353	-3.16707	0.00153984	0.0446965
ENSG00000148053	832.317	0.899713	0.284147	3.16636	0.00154359	0.0447016
ENSG00000247271	793.597	0.569733	0.179924	3.16653	0.00154271	0.0447016
ENSG00000197045	18264.4	0.311121	0.0982898	3.16535	0.00154899	0.044806
ENSG00000100162	1975.63	0.283166	0.0895891	3.16072	0.0015738	0.0454711
ENSG00000146414	3213.48	0.428119	0.135483	3.15995	0.00157796	0.045493
ENSG00000185432	1010.69	-0.624504	0.197634	-3.15991	0.0015782	0.045493
ENSG00000230623	1662.65	-0.537527	0.170166	-3.15884	0.00158398	0.0456069
ENSG00000224533	4.07715	4.46072	1.41233	3.15842	0.00158625	0.0456198
ENSG00000124839	5895.54	-1.07856	0.341578	-3.15758	0.00159083	0.045699
ENSG00000223784	61.7506	1.94634	0.616655	3.15629	0.0015979	0.0458493
ENSG00000255372	123.856	0.897257	0.284475	3.15408	0.00161007	0.0461455
ENSG00000010270	14669.2	0.177417	0.056259	3.15358	0.00161284	0.0461719
ENSG00000169490	8850.35	0.238616	0.075702	3.15204	0.00162132	0.0463617
ENSG00000226328	504.519	-0.650167	0.206299	-3.15157	0.00162394	0.0463833
ENSG00000135926	4272.64	-0.908316	0.28827	-3.15092	0.00162759	0.0464345
ENSG00000184502	807.736	-0.621584	0.197299	-3.15046	0.00163011	0.0464535
ENSG00000244040	7.72994	-6.42088	2.03834	-3.15005	0.00163242	0.0464663
ENSG00000229425	465.64	-0.933545	0.296393	-3.14968	0.00163448	0.0464719
ENSG00000186832	116.552	-3.29051	1.04504	-3.14868	0.00164008	0.0465781
ENSG00000184867	2716.3	0.469934	0.149295	3.14769	0.00164566	0.0466585
ENSG00000101280	361.454	-0.784959	0.24939	-3.14752	0.00164664	0.0466585
ENSG00000116106	3445.77	0.392536	0.124822	3.14477	0.00166219	0.0470458
ENSG00000171612	468.568	-0.466675	0.148505	-3.14248	0.00167522	0.0471402
ENSG00000287916	31.7766	1.41002	0.448736	3.1422	0.00167684	0.0471402
ENSG00000122068	13585.8	0.262007	0.0833521	3.14338	0.00167008	0.0471402
ENSG00000109576	3017.9	0.295412	0.093982	3.14328	0.00167065	0.0471402
ENSG00000083123	6586.8	0.40296	0.128228	3.14252	0.00167502	0.0471402
ENSG00000178033	572.208	0.606936	0.193102	3.14308	0.00167183	0.0471402
ENSG00000122406	51488.2	-0.17209	0.0547983	-3.14042	0.00168703	0.0473356
ENSG00000006116	589.498	1.13024	0.359913	3.14033	0.00168758	0.0473356
ENSG00000271533	162.029	1.23135	0.392293	3.13885	0.00169612	0.0474686
ENSG00000184557	335.402	-0.854524	0.27224	-3.13886	0.00169608	0.0474686
ENSG00000257740	131.304	1.07179	0.34155	3.13802	0.00170092	0.0475496
ENSG00000115718	66.434	2.52491	0.804816	3.13725	0.00170543	0.0476225
ENSG00000165349	2246.34	-0.671222	0.214008	-3.13643	0.0017102	0.0476493
ENSG00000125148	376.148	-0.525174	0.167436	-3.13656	0.00170944	0.0476493
ENSG00000289341	72.9254	1.53052	0.488077	3.13583	0.00171371	0.0476939
ENSG00000178966	7076.47	0.349597	0.111527	3.13464	0.00172062	0.0477798
ENSG00000285517	72.8089	-1.89481	0.604426	-3.1349	0.00171914	0.0477798
ENSG00000096696	37806.5	-0.265121	0.0845905	-3.13417	0.0017234	0.0478037
ENSG00000213741	10013.2	-0.333012	0.106323	-3.13208	0.0017357	0.0480917
ENSG00000128654	6520.89	0.249789	0.0797735	3.13122	0.00174079	0.0481793
ENSG00000196507	1502.96	0.441757	0.141123	3.1303	0.00174626	0.048277
ENSG00000167740	1890.75	0.435314	0.139174	3.12785	0.00176091	0.0486284
ENSG00000145979	7743.17	0.273188	0.0874271	3.12475	0.00177955	0.0490889
ENSG00000184500	3375.56	0.480322	0.153763	3.12378	0.00178546	0.0491977
ENSG00000203972	13.1752	7.18713	2.30139	3.12296	0.00179043	0.0492803
ENSG00000079385	761.076	-0.521669	0.167089	-3.1221	0.00179564	0.0493692
ENSG00000145982	1817.42	0.467668	0.149893	3.12002	0.0018084	0.0495564
ENSG00000203930	1151.4	0.747707	0.239648	3.12002	0.00180838	0.0495564
ENSG00000261008	665.251	0.645917	0.206998	3.1204	0.00180605	0.0495564
ENSG00000131941	1604.38	-0.417206	0.133749	-3.11933	0.00181262	0.0496179
ENSG00000198840	5184.84	-0.256954	0.0824473	-3.11658	0.00182962	0.0500283
ENSG00000286069	53.1455	1.55293	0.499302	3.11021	0.00186955	0.0510642
ENSG00000124731	44.5668	-2.69672	0.867808	-3.10751	0.00188671	0.0514205
ENSG00000261040	406.487	0.572686	0.184283	3.10764	0.00188591	0.0514205
ENSG00000182836	823.057	-0.390783	0.125858	-3.10496	0.00190305	0.0518094
ENSG00000117114	10233.4	0.301753	0.0972207	3.1038	0.00191053	0.0519532
ENSG00000100722	10716	0.242971	0.0782975	3.10317	0.00191457	0.0519532
ENSG00000108379	997.926	-0.749205	0.241424	-3.10327	0.00191393	0.0519532
ENSG00000227082	8.26934	-6.5214	2.10188	-3.10265	0.00191797	0.051989
ENSG00000130513	5834.66	-1.04507	0.336867	-3.10232	0.0019201	0.0519903
ENSG00000287238	102.526	-1.72215	0.555178	-3.10198	0.00192228	0.0519931
ENSG00000111716	6501.77	0.168813	0.0544305	3.10145	0.00192575	0.0520307
ENSG00000180616	724.584	0.599301	0.193266	3.10092	0.00192923	0.0520683
ENSG00000163539	13251	0.28039	0.0904571	3.0997	0.00193719	0.0522269
ENSG00000048471	604.796	0.705346	0.227597	3.0991	0.00194109	0.0522755
ENSG00000131375	4110.57	0.32201	0.103917	3.09871	0.00194365	0.0522882
ENSG00000138434	8294.15	-0.253798	0.0819192	-3.09815	0.00194735	0.0523313
ENSG00000257252	140.468	-1.00355	0.324034	-3.09707	0.00195445	0.0524659
ENSG00000095596	379.449	-1.2003	0.387645	-3.09639	0.00195894	0.05253
ENSG00000161547	3279.17	0.4458	0.144004	3.09574	0.00196322	0.0525883
ENSG00000159399	1860.8	-0.79751	0.257676	-3.09501	0.00196803	0.0526606
ENSG00000250360	134.387	0.773925	0.250165	3.09366	0.00197704	0.0527852
ENSG00000123119	1376.26	-0.835614	0.270102	-3.0937	0.00197678	0.0527852
ENSG00000267632	7.89809	-5.08839	1.64494	-3.09336	0.00197902	0.0527852
ENSG00000200087	16.921	-2.99096	0.967295	-3.09209	0.00198755	0.052956
ENSG00000269984	166.412	1.23766	0.400308	3.09176	0.00198971	0.0529572
ENSG00000160870	61.964	-1.6123	0.521575	-3.09121	0.00199343	0.0529998
ENSG00000110002	3957.81	0.495654	0.160421	3.0897	0.00200358	0.0531386
ENSG00000181019	28229.9	0.338759	0.109627	3.09009	0.00200095	0.0531386
ENSG00000142534	28377.2	-0.221327	0.0716387	-3.08949	0.00200503	0.0531386
ENSG00000129244	298.337	0.987415	0.319734	3.08824	0.00201344	0.0533051
ENSG00000288008	7.8419	5.44811	1.76545	3.08597	0.00202891	0.0536576
ENSG00000136068	2151.33	-0.612174	0.198686	-3.08111	0.00206228	0.0544825
ENSG00000157240	457.566	0.75872	0.246669	3.07587	0.0020989	0.0552166
ENSG00000237264	61.0809	-0.613191	0.199322	-3.07638	0.00209528	0.0552166
ENSG00000280234	57.3849	2.60134	0.845682	3.07603	0.00209778	0.0552166
ENSG00000141956	188.268	-1.15388	0.375024	-3.0768	0.00209233	0.0552166
ENSG00000157510	644.865	-0.813415	0.264548	-3.07473	0.00210694	0.0553699
ENSG00000273165	11.6624	3.62285	1.1786	3.07385	0.00211317	0.0554752
ENSG00000269949	13.1249	3.03622	0.987982	3.07316	0.00211807	0.0555454
ENSG00000289687	27.0832	-1.5037	0.489481	-3.07203	0.00212609	0.0556974
ENSG00000242125	824.594	-0.477575	0.155574	-3.06976	0.00214234	0.056006
ENSG00000114115	4085.55	0.292833	0.0954059	3.06934	0.00214536	0.056006
ENSG00000260585	21.25	-4.29161	1.39818	-3.06942	0.00214475	0.056006
ENSG00000204603	13.8761	-4.46186	1.45379	-3.06913	0.00214684	0.056006
ENSG00000160808	184.386	-1.94552	0.634754	-3.06501	0.00217665	0.0567244
ENSG00000166183	7.92128	-5.46673	1.78408	-3.06418	0.00218269	0.0568227
ENSG00000166573	121.869	1.98667	0.648429	3.06382	0.00218529	0.0568312
ENSG00000279413	41.9271	0.845397	0.276128	3.06161	0.00220149	0.057193
ENSG00000089335	4009.17	0.370468	0.121084	3.05961	0.00221629	0.0575176
ENSG00000182287	32374.3	0.336024	0.109842	3.05916	0.00221957	0.0575431
ENSG00000177602	195.194	-0.992003	0.324402	-3.05795	0.00222859	0.057717
ENSG00000105186	1511.1	-0.545002	0.178317	-3.05636	0.00224041	0.0579631
ENSG00000091972	6029.12	0.443411	0.145094	3.05602	0.00224299	0.0579698
ENSG00000225423	79.4168	-1.42468	0.466338	-3.05503	0.0022504	0.0581012
ENSG00000155465	985.343	-0.431313	0.141234	-3.05389	0.00225896	0.0582367
ENSG00000154864	302.624	1.05758	0.346326	3.05371	0.00226031	0.0582367
ENSG00000125848	22411.9	0.665033	0.217861	3.05255	0.00226905	0.0584019
ENSG00000075945	6332.26	0.341177	0.11182	3.05112	0.00227986	0.0586196
ENSG00000145365	1028.18	0.401687	0.131738	3.04912	0.0022951	0.0588388
ENSG00000279565	5.96987	6.04444	1.98238	3.04908	0.00229545	0.0588388
ENSG00000198513	5734.82	0.278315	0.0912737	3.04923	0.00229428	0.0588388
ENSG00000132953	2654.34	-0.442414	0.145145	-3.04808	0.0023031	0.0589744
ENSG00000279483	5256.97	-0.284366	0.0933056	-3.04769	0.00230612	0.0589912
ENSG00000269743	265.146	0.855962	0.280998	3.04615	0.00231792	0.059172
ENSG00000161981	8871.69	0.29991	0.0984467	3.04642	0.00231581	0.059172
ENSG00000092068	5178.07	-1.04064	0.341674	-3.04571	0.00232134	0.059199
ENSG00000196437	1281.19	0.536847	0.176347	3.04426	0.0023325	0.0593812
ENSG00000197381	957.186	-0.691852	0.227271	-3.04417	0.00233324	0.0593812
ENSG00000185885	5657.46	-0.622358	0.20447	-3.04376	0.0023364	0.059401
ENSG00000216921	110.703	-0.963011	0.316431	-3.04336	0.00233956	0.059421
ENSG00000125814	7453.66	0.392373	0.128946	3.04292	0.00234291	0.0594458
ENSG00000112667	2211.45	-0.291309	0.0957441	-3.04258	0.00234562	0.059454
ENSG00000145362	11313.8	0.385313	0.126674	3.04178	0.00235184	0.0595513
ENSG00000087086	412566	-0.387393	0.127554	-3.0371	0.00238869	0.0604231
ENSG00000141934	745.152	-0.814296	0.268416	-3.03371	0.00241564	0.0610432
ENSG00000260219	281.379	-0.562948	0.185605	-3.03304	0.00242104	0.0611178
ENSG00000167721	8475.81	-0.256471	0.0845985	-3.03163	0.0024324	0.0613426
ENSG00000242114	185.063	-0.405549	0.133938	-3.02788	0.00246277	0.0620459
ENSG00000236708	68.4426	1.27679	0.422032	3.02534	0.00248352	0.0625056
ENSG00000113013	33642.1	-0.237989	0.0787438	-3.02232	0.00250848	0.0630069
ENSG00000129354	4160.48	-0.341399	0.112953	-3.02249	0.00250701	0.0630069
ENSG00000150764	2754.81	0.385365	0.127566	3.02091	0.00252014	0.0632363
ENSG00000184260	667.146	-0.398817	0.132227	-3.01616	0.00255996	0.0641694
ENSG00000174282	448.6	-0.536388	0.177856	-3.01587	0.00256246	0.0641694
ENSG00000287455	5.78277	-4.98801	1.65417	-3.01542	0.00256621	0.064199
ENSG00000257870	7.16253	5.3156	1.76466	3.01226	0.00259313	0.0648076
ENSG00000163814	4278.94	-0.456666	0.151635	-3.01161	0.00259869	0.0648169
ENSG00000157542	1123.16	0.714996	0.2374	3.01177	0.00259725	0.0648169
ENSG00000180660	2486.48	0.474369	0.15754	3.0111	0.00260299	0.0648594
ENSG00000137731	36.9719	-1.49275	0.496116	-3.00886	0.00262226	0.0652744
ENSG00000172716	153.822	-2.74444	0.912504	-3.00759	0.00263325	0.0654827
ENSG00000213046	12.3696	7.09432	2.35955	3.00665	0.00264147	0.0654917
ENSG00000180425	808.393	0.488602	0.162507	3.00665	0.00264143	0.0654917
ENSG00000087253	471.891	-0.949595	0.315828	-3.00668	0.00264117	0.0654917
ENSG00000269825	1112.12	-0.537513	0.178866	-3.00511	0.00265485	0.0657581
ENSG00000112972	25004.6	-0.496681	0.165334	-3.00411	0.00266362	0.0658448
ENSG00000273001	39.1921	-2.0731	0.690066	-3.00421	0.00266272	0.0658448
ENSG00000075131	2891.26	-0.337565	0.1124	-3.00324	0.00267121	0.0659672
ENSG00000214078	5805.8	-0.439143	0.146243	-3.00282	0.00267486	0.0659923
ENSG00000143546	8.40747	-4.59387	1.53072	-3.00111	0.00268995	0.0662991
ENSG00000081479	5911.65	-0.374129	0.124698	-3.00028	0.00269734	0.0664156
ENSG00000267698	32.2714	-1.15453	0.3849	-2.99955	0.00270377	0.0665086
ENSG00000089220	38211.8	0.178861	0.059641	2.99897	0.00270897	0.0665709
ENSG00000134369	2058.96	0.347375	0.115876	2.99782	0.00271914	0.0667551
ENSG00000108960	3721.37	0.583387	0.194652	2.99708	0.00272581	0.0668532
ENSG00000141622	879.612	0.40213	0.134194	2.99663	0.00272985	0.0668867
ENSG00000138078	13785.7	0.215223	0.0718393	2.99589	0.00273642	0.0669164
ENSG00000260372	91.2648	1.32496	0.442246	2.99598	0.00273561	0.0669164
ENSG00000259165	6.67275	6.20323	2.07226	2.99346	0.00275831	0.0673859
ENSG00000177058	7603.51	-0.281596	0.0940994	-2.99254	0.0027667	0.0675247
ENSG00000184613	3523.36	0.462102	0.154435	2.99222	0.0027696	0.0675297
ENSG00000273173	165.793	0.846285	0.282904	2.99142	0.00277685	0.0676403
ENSG00000203266	49.6797	2.38844	0.798537	2.99103	0.00278043	0.0676615
ENSG00000100600	14623.2	0.251055	0.0839549	2.99036	0.0027865	0.0677433
ENSG00000250467	67.1766	0.672887	0.22512	2.98902	0.00279878	0.0677447
ENSG00000119938	88.4525	1.69449	0.566925	2.98892	0.00279967	0.0677447
ENSG00000103018	45528.1	-0.229566	0.0767961	-2.98929	0.00279623	0.0677447
ENSG00000288109	5.78662	-6.00604	2.0092	-2.98927	0.00279641	0.0677447
ENSG00000198795	1807.38	0.651189	0.217871	2.98887	0.00280011	0.0677447
ENSG00000196177	2228.22	0.45823	0.153329	2.98854	0.00280314	0.0677524
ENSG00000148572	3974.63	0.292393	0.0978853	2.9871	0.00281637	0.0678542
ENSG00000153485	990.527	-0.408478	0.136756	-2.9869	0.00281821	0.0678542
ENSG00000198482	872.286	-0.508555	0.170217	-2.98768	0.00281107	0.0678542
ENSG00000196646	1663.8	0.602215	0.201604	2.98712	0.00281616	0.0678542
ENSG00000099800	6692.9	-0.193007	0.0646278	-2.98644	0.00282247	0.0678913
ENSG00000162929	5242.81	0.393664	0.131984	2.98267	0.00285744	0.0686664
ENSG00000173436	1427.18	0.284475	0.0954096	2.98162	0.0028673	0.0688032
ENSG00000169933	129.733	1.12879	0.378602	2.98148	0.00286863	0.0688032
ENSG00000086289	205.885	1.00802	0.338186	2.98067	0.00287617	0.0689177
ENSG00000136099	23.9202	2.92021	0.980223	2.97913	0.00289071	0.0691999
ENSG00000100784	1040.77	0.564788	0.189636	2.97828	0.00289869	0.0693245
ENSG00000167612	22.5212	-3.67108	1.23287	-2.97767	0.00290448	0.0693966
ENSG00000177990	633.231	0.62929	0.211368	2.97722	0.00290876	0.0694325
ENSG00000206120	527.072	0.435819	0.14643	2.97631	0.00291744	0.0695239
ENSG00000261609	4059.24	-0.484692	0.162854	-2.97623	0.00291815	0.0695239
ENSG00000269190	929.201	-0.438176	0.147357	-2.97357	0.00294358	0.0700627
ENSG00000227088	4.8199	4.72311	1.58867	2.973	0.00294906	0.0701264
ENSG00000263753	2844.49	0.3786	0.127364	2.97258	0.00295306	0.0701548
ENSG00000081189	443.546	0.727359	0.24481	2.97111	0.00296722	0.0704243
ENSG00000237481	6.43937	6.15072	2.07122	2.96961	0.00298179	0.0707029
ENSG00000072364	6983.88	-0.316803	0.106766	-2.96726	0.0030047	0.0711786
ENSG00000259349	107.925	1.1472	0.386673	2.96684	0.0030088	0.0712083
ENSG00000235531	190.879	0.912159	0.307581	2.96559	0.003021	0.0713619
ENSG00000289174	87.8356	-1.17047	0.394669	-2.9657	0.00301998	0.0713619
ENSG00000119878	6988.95	0.368317	0.124212	2.96522	0.00302465	0.0713807
ENSG00000291144	160.157	1.06126	0.357984	2.96455	0.00303131	0.0714702
ENSG00000236094	184.593	-0.619905	0.20924	-2.96265	0.00305002	0.0718436
ENSG00000130193	244.034	-1.56006	0.526676	-2.96209	0.00305559	0.071907
ENSG00000169855	4409.71	0.287493	0.0970763	2.96152	0.00306125	0.0719725
ENSG00000143420	17565.7	-0.190093	0.0642168	-2.96018	0.00307463	0.0722191
ENSG00000089775	1071.49	-0.555249	0.187623	-2.95939	0.00308245	0.0723349
ENSG00000250546	14.1609	3.89071	1.31543	2.95774	0.00309906	0.0726565
ENSG00000232187	159.517	-0.53829	0.182102	-2.95598	0.00311675	0.0730026
ENSG00000157502	488.453	0.675293	0.228533	2.95491	0.0031276	0.0731615
ENSG00000253507	64.2163	-2.48907	0.842401	-2.95473	0.00312939	0.0731615
ENSG00000143502	376.978	0.659185	0.223169	2.95374	0.00313946	0.0733283
ENSG00000115307	7976.05	-0.255879	0.0866565	-2.9528	0.00314908	0.0734844
ENSG00000118217	6939.3	0.321909	0.109049	2.95198	0.00315748	0.0735551
ENSG00000131019	1228.37	0.585746	0.198429	2.95193	0.003158	0.0735551
ENSG00000113594	1320.65	-0.540092	0.183266	-2.94703	0.00320839	0.0746253
ENSG00000107130	773.545	0.476553	0.161714	2.94689	0.00320991	0.0746253
ENSG00000182752	901.07	0.667993	0.226905	2.94393	0.00324071	0.0752713
ENSG00000290469	10.2492	-3.05309	1.03733	-2.94321	0.00324831	0.0753777
ENSG00000231460	69.4491	0.930888	0.316392	2.94219	0.00325895	0.0755079
ENSG00000104881	221.011	-0.804674	0.273503	-2.9421	0.00325996	0.0755079
ENSG00000166949	2337.69	-0.660183	0.22449	-2.94081	0.00327353	0.0757519
ENSG00000165181	10.2661	-4.55441	1.5495	-2.93928	0.00328975	0.0760569
ENSG00000170734	2422.04	-0.421913	0.14359	-2.93831	0.00330009	0.0762253
ENSG00000271270	302.736	0.694206	0.236321	2.93755	0.00330813	0.0763405
ENSG00000161847	7.4521	-3.9772	1.35464	-2.93599	0.00332485	0.0766556
ENSG00000091010	144.147	2.47153	0.842237	2.93449	0.00334101	0.0769573
ENSG00000113916	864.145	-0.60288	0.205572	-2.9327	0.00336032	0.0773097
ENSG00000174600	12.9896	7.16488	2.44327	2.9325	0.0033625	0.0773097
ENSG00000241313	8.49583	5.56263	1.8973	2.93187	0.00336933	0.0773955
ENSG00000103540	9553.27	0.237436	0.0810152	2.93076	0.00338139	0.0776011
ENSG00000257474	5.36248	-5.89486	2.01174	-2.93023	0.00338711	0.0776612
ENSG00000198399	2367.52	-0.592235	0.202162	-2.92951	0.00339497	0.07777
ENSG00000226702	367.863	0.605248	0.206675	2.9285	0.00340601	0.0779516
ENSG00000101665	278.991	-0.726716	0.248226	-2.92764	0.00341547	0.0780966
ENSG00000163630	2083.5	0.516389	0.17683	2.92026	0.00349739	0.0798965
ENSG00000267452	12.0178	-7.05858	2.41948	-2.9174	0.00352963	0.0805594
ENSG00000133983	748.673	0.692441	0.237389	2.91691	0.0035352	0.080613
ENSG00000271147	614.871	0.730603	0.250593	2.9155	0.00355122	0.0809044
ENSG00000116396	195.207	-0.630686	0.216413	-2.91427	0.00356526	0.0811502
ENSG00000228223	487.57	0.914084	0.31378	2.91314	0.00357815	0.081327
ENSG00000065357	2723.7	-0.728181	0.249999	-2.91273	0.00358279	0.081327
ENSG00000198959	1175.48	-0.962085	0.330293	-2.91282	0.0035818	0.081327
ENSG00000068366	13948.1	-0.253165	0.0869485	-2.91167	0.00359508	0.0815319
ENSG00000129235	12945.6	0.228351	0.0784372	2.91126	0.00359979	0.0815647
ENSG00000205111	16.8953	3.03416	1.04274	2.90981	0.00361654	0.0816572
ENSG00000104722	20765.7	0.204274	0.070196	2.91006	0.00361363	0.0816572
ENSG00000136870	1889.33	0.350662	0.120481	2.91052	0.00360833	0.0816572
ENSG00000233821	12.6562	6.15061	2.11393	2.90956	0.00361939	0.0816572
ENSG00000133477	152.644	-1.2767	0.438804	-2.90949	0.0036202	0.0816572
ENSG00000266952	23.5365	-3.14019	1.07941	-2.90916	0.00362404	0.08167
ENSG00000088325	30681.9	-0.237076	0.0815396	-2.90749	0.0036434	0.0820322
ENSG00000242265	27504	0.642853	0.221159	2.90675	0.00365207	0.0821534
ENSG00000162244	32927.5	-0.227486	0.0782758	-2.90621	0.00365832	0.0822201
ENSG00000249152	18.3477	-3.38386	1.16496	-2.90469	0.00367615	0.0825465
ENSG00000230423	12.1569	-4.03	1.38798	-2.90351	0.0036901	0.0827854
ENSG00000114316	3523.07	-0.382019	0.131624	-2.90234	0.00370383	0.083013
ENSG00000197555	1079.92	0.565846	0.194979	2.90208	0.00370689	0.083013
ENSG00000224043	116.982	1.27689	0.440218	2.90059	0.0037246	0.0833351
ENSG00000184005	2639.2	0.354082	0.122152	2.89871	0.00374703	0.0837618
ENSG00000174606	4837.47	0.317667	0.109703	2.89571	0.00378299	0.0840023
ENSG00000272106	63.4734	1.53401	0.529515	2.897	0.00376744	0.0840023
ENSG00000178821	137.544	-0.853523	0.294584	-2.89738	0.00376293	0.0840023
ENSG00000288895	8.57558	-3.77937	1.30483	-2.89645	0.00377416	0.0840023
ENSG00000249593	42.3423	-0.970604	0.335124	-2.89625	0.00377653	0.0840023
ENSG00000085511	902.826	0.610251	0.210732	2.89587	0.00378112	0.0840023
ENSG00000090061	1989.11	-0.36198	0.125001	-2.89582	0.00378172	0.0840023
ENSG00000099783	31579.5	0.189142	0.065321	2.89557	0.00378468	0.0840023
ENSG00000183856	409.471	-0.496196	0.17151	-2.8931	0.00381454	0.08459
ENSG00000287811	876.936	0.653103	0.225798	2.89242	0.00382293	0.0847009
ENSG00000261329	32.831	-1.85488	0.641597	-2.89104	0.00383965	0.0849961
ENSG00000144671	10.709	-6.89221	2.38575	-2.88891	0.00386581	0.0854994
ENSG00000230269	222.776	-0.823226	0.284994	-2.88858	0.00386991	0.0855144
ENSG00000232119	3864.25	0.232082	0.080373	2.88756	0.00388237	0.0855675
ENSG00000254985	5.07163	-5.30824	1.83817	-2.88779	0.00387958	0.0855675
ENSG00000182601	80.3469	0.9151	0.316913	2.88755	0.00388259	0.0855675
ENSG00000142794	1247.77	0.605262	0.209795	2.88502	0.00391394	0.0858988
ENSG00000270460	6.25325	-3.87361	1.34236	-2.88566	0.00390595	0.0858988
ENSG00000290555	24.2962	-2.59311	0.89882	-2.88501	0.00391398	0.0858988
ENSG00000215030	3850.94	-0.242585	0.0840642	-2.88571	0.00390529	0.0858988
ENSG00000134757	1838.6	-0.701989	0.243352	-2.88467	0.00391824	0.0858988
ENSG00000184164	3494.48	0.722997	0.250622	2.88482	0.00391644	0.0858988
ENSG00000143355	1997.79	0.493402	0.171135	2.88312	0.0039376	0.0862476
ENSG00000264349	9.42767	-2.24886	0.780211	-2.88238	0.00394689	0.0863753
ENSG00000089902	1303.7	-0.64904	0.225234	-2.88163	0.00395629	0.0864509
ENSG00000219438	44.6018	1.64333	0.570295	2.88155	0.00395726	0.0864509
ENSG00000185834	35.0528	-0.897898	0.31166	-2.88102	0.00396395	0.0865214
ENSG00000135750	593.258	-0.526347	0.182811	-2.87919	0.00398702	0.0869491
ENSG00000250422	10.3897	6.84228	2.37765	2.87775	0.00400526	0.0871945
ENSG00000118094	64.2904	-2.05554	0.714287	-2.87775	0.00400523	0.0871945
ENSG00000162415	181.148	1.1521	0.400943	2.87347	0.00405994	0.0879302
ENSG00000286071	11.2443	-4.62625	1.6098	-2.87381	0.00405557	0.0879302
ENSG00000198363	11319.2	0.229137	0.0797219	2.8742	0.00405046	0.0879302
ENSG00000204021	72.017	-2.037	0.708881	-2.87354	0.00405896	0.0879302
ENSG00000275216	518.501	0.859737	0.299153	2.87391	0.00405427	0.0879302
ENSG00000186732	8.10982	-4.68335	1.62987	-2.87345	0.00406016	0.0879302
ENSG00000185222	17304.4	-0.23893	0.0831906	-2.87207	0.00407788	0.0882376
ENSG00000183098	3149.47	0.41986	0.146209	2.87165	0.00408336	0.0882796
ENSG00000275160	12.1552	3.27289	1.14011	2.87068	0.00409596	0.0883491
ENSG00000248550	118.666	0.987225	0.343911	2.87058	0.00409718	0.0883491
ENSG00000274015	45.2214	-1.72457	0.600727	-2.8708	0.00409432	0.0883491
ENSG00000164176	9779.86	0.141705	0.0493991	2.86858	0.00412313	0.0888322
ENSG00000142530	276.077	-0.691478	0.241142	-2.86751	0.00413714	0.0890571
ENSG00000286073	7.85875	-5.44904	1.90048	-2.86719	0.00414136	0.0890712
ENSG00000277301	6.63571	5.19886	1.81441	2.86531	0.004166	0.0895241
ENSG00000116005	13287.3	0.282084	0.098458	2.86502	0.00416989	0.0895309
ENSG00000092345	10.1371	-6.81418	2.37916	-2.86411	0.00418184	0.0896713
ENSG00000275342	280.696	-0.652367	0.227784	-2.86397	0.00418361	0.0896713
ENSG00000135205	147.886	1.29401	0.451937	2.86326	0.0041931	0.0897216
ENSG00000175906	8940.68	0.274585	0.0958995	2.86325	0.00419313	0.0897216
ENSG00000135269	13198.1	-0.326709	0.114129	-2.86264	0.00420131	0.0897583
ENSG00000131747	32884.1	-0.385637	0.134729	-2.86231	0.00420563	0.0897583
ENSG00000169738	3089.08	-0.169212	0.0591123	-2.86255	0.00420248	0.0897583
ENSG00000144134	626.466	0.431559	0.1508	2.8618	0.00421245	0.0898273
ENSG00000141448	109.791	-1.48342	0.518517	-2.86088	0.00422466	0.0900107
ENSG00000127423	2026.75	-0.262085	0.0916242	-2.86043	0.00423068	0.0900622
ENSG00000119283	51.8763	-1.64863	0.576763	-2.85841	0.00425765	0.0904824
ENSG00000223742	13.0232	3.81529	1.3347	2.85854	0.00425599	0.0904824
ENSG00000051596	14946.3	0.195512	0.0684076	2.85804	0.00426263	0.0905112
ENSG00000155011	878.369	0.614269	0.214974	2.8574	0.00427121	0.0906164
ENSG00000273066	13.3869	2.17976	0.763428	2.85522	0.00430064	0.0911634
ENSG00000147174	86.3307	-1.69326	0.593123	-2.85482	0.00430611	0.0912019
ENSG00000137486	1235.22	-0.781837	0.274024	-2.85317	0.00432858	0.0916002
ENSG00000099139	767.314	0.649776	0.227914	2.85097	0.00435863	0.0920802
ENSG00000128739	3349.3	0.259545	0.0910314	2.85116	0.00435605	0.0920802
ENSG00000127884	17913.2	0.343167	0.120397	2.85029	0.00436787	0.0921975
ENSG00000143375	1031.9	-0.894921	0.314037	-2.84973	0.00437559	0.0922047
ENSG00000135108	16071	0.1413	0.0495792	2.84999	0.00437205	0.0922047
ENSG00000290792	92.7123	1.56605	0.549727	2.84878	0.00438878	0.0923308
ENSG00000122707	1542.49	-0.597498	0.20974	-2.84876	0.00438896	0.0923308
ENSG00000123600	5353.8	-0.307431	0.108006	-2.84642	0.00442144	0.0929358
ENSG00000204148	15.5868	4.93341	1.73342	2.84606	0.00442632	0.0929602
ENSG00000185104	1350.6	0.407508	0.143197	2.8458	0.00443007	0.0929608
ENSG00000178913	16092.4	0.213489	0.0750462	2.84477	0.00444436	0.093141
ENSG00000291061	89.5531	0.908694	0.31944	2.84464	0.00444611	0.093141
ENSG00000109929	27171.3	-0.456826	0.160653	-2.84357	0.00446116	0.093378
ENSG00000163006	5523.63	0.371868	0.130807	2.84288	0.00447077	0.0935009
ENSG00000185046	260.6	0.998641	0.351374	2.8421	0.00448172	0.0936515
ENSG00000108788	3046.23	-0.328961	0.115771	-2.84148	0.00449046	0.0937558
ENSG00000105372	144403	-0.192603	0.0678255	-2.83969	0.00451574	0.0942049
ENSG00000135974	1636.86	-0.261396	0.0920767	-2.8389	0.00452695	0.094294
ENSG00000283599	6.39013	-5.1559	1.81653	-2.83832	0.00453511	0.094294
ENSG00000180764	58.5922	-0.859043	0.302621	-2.83868	0.0045301	0.094294
ENSG00000140332	5228.16	-0.445517	0.156951	-2.83857	0.00453161	0.094294
ENSG00000225792	53.7524	1.05754	0.372649	2.8379	0.00454118	0.0943418
ENSG00000152104	8977.67	-0.34578	0.121887	-2.8369	0.00455544	0.0945202
ENSG00000127364	9.65635	-6.74441	2.3775	-2.83676	0.00455733	0.0945202
ENSG00000225548	476.4	-0.676473	0.23849	-2.83648	0.00456132	0.0945206
ENSG00000104824	1048.07	-0.367353	0.129521	-2.83623	0.00456492	0.0945206
ENSG00000245573	528.564	0.748803	0.264046	2.83588	0.00456989	0.0945453
ENSG00000121005	7591.24	0.393274	0.138729	2.83484	0.00458483	0.0947758
ENSG00000137801	3487.88	0.324269	0.114421	2.834	0.00459693	0.0949475
ENSG00000278997	5.19573	-5.35294	1.88938	-2.83318	0.00460877	0.0950767
ENSG00000149658	1780.42	-0.377225	0.133152	-2.83304	0.00461079	0.0950767
ENSG00000152818	8638.35	0.284046	0.100293	2.83217	0.00462329	0.0952558
ENSG00000144566	15165.1	0.160846	0.0568059	2.8315	0.00463295	0.0953763
ENSG00000146276	186.114	1.07806	0.38085	2.83067	0.00464509	0.0955474
ENSG00000105472	827.689	-0.376831	0.133165	-2.82982	0.00465748	0.0957181
ENSG00000093072	1632.57	-0.665827	0.23531	-2.82957	0.00466105	0.0957181
ENSG00000213889	174.324	-1.13758	0.402236	-2.82814	0.00468191	0.0960676
ENSG00000171916	4.92201	-5.77198	2.04229	-2.82623	0.00471002	0.096565
ENSG00000249306	9.07083	-3.80442	1.34716	-2.82403	0.0047424	0.0969907
ENSG00000250267	5.43815	-5.9162	2.09495	-2.82403	0.00474242	0.0969907
ENSG00000108439	690.655	-0.497389	0.176097	-2.82452	0.00473511	0.0969907
ENSG00000100425	483.169	-0.754832	0.267341	-2.82348	0.00475049	0.0970763
ENSG00000232821	9.54044	-6.72607	2.38268	-2.8229	0.0047591	0.0971727
ENSG00000164978	1104.8	-0.401912	0.142405	-2.82232	0.00476778	0.0972705
ENSG00000137807	9217.52	-0.268181	0.0950388	-2.8218	0.00477543	0.0973472
ENSG00000148444	441.162	0.418143	0.148227	2.82096	0.00478798	0.0975233
ENSG00000077254	14142.3	0.191014	0.067744	2.81964	0.00480775	0.0975287
ENSG00000135638	76.1404	-1.37818	0.488699	-2.82009	0.00480095	0.0975287
ENSG00000163320	6586.76	0.274836	0.0974541	2.82016	0.0048	0.0975287
ENSG00000198901	420.295	-0.313054	0.110992	-2.8205	0.0047949	0.0975287
ENSG00000167526	61504.2	-0.245058	0.0869057	-2.81982	0.0048051	0.0975287
ENSG00000166250	1971.88	-0.426177	0.151172	-2.81915	0.00481512	0.0975988
ENSG00000251614	9.97949	6.78457	2.40813	2.81736	0.00484199	0.0979055
ENSG00000148541	2564.21	0.424344	0.150603	2.81764	0.00483781	0.0979055
ENSG00000175643	915.235	-0.462675	0.164221	-2.81739	0.0048416	0.0979055
ENSG00000162222	2313.98	-0.188928	0.0670803	-2.81644	0.00485586	0.0981064
ENSG00000065882	3027.07	-0.356524	0.126692	-2.81411	0.0048913	0.0987234
ENSG00000287007	12.2637	5.20181	1.84861	2.81391	0.0048943	0.0987234
ENSG00000278845	9685.72	-0.303421	0.10784	-2.81362	0.00489869	0.0987322
ENSG00000164181	1323.92	-0.59367	0.211049	-2.81295	0.0049089	0.0988584
ENSG00000288966	364.606	1.07986	0.384037	2.81187	0.00492538	0.0990907
ENSG00000069493	378.321	0.58641	0.208562	2.81168	0.00492837	0.0990907
ENSG00000173214	1089.27	0.479143	0.170441	2.81119	0.00493583	0.099161
ENSG00000164104	22098	-0.146304	0.0520552	-2.81055	0.00494574	0.0992257
ENSG00000106333	710.918	-0.756085	0.269025	-2.81047	0.00494699	0.0992257
ENSG00000152193	2509.03	0.292687	0.104154	2.81013	0.00495213	0.0992492
ENSG00000138111	395.098	-0.557458	0.198486	-2.80855	0.00497654	0.0995786
ENSG00000157368	12.6998	5.23463	1.86373	2.80868	0.00497444	0.0995786
ENSG00000289294	228.841	0.780647	0.278204	2.80602	0.00501568	0.100201
ENSG00000007047	157.794	-0.739992	0.263695	-2.80624	0.00501235	0.100201
ENSG00000079393	267.301	-0.821674	0.292972	-2.80461	0.00503769	0.100561
ENSG00000204520	940.97	-0.456743	0.162884	-2.80411	0.00504556	0.100637
ENSG00000102383	1555.48	0.32253	0.115045	2.80352	0.00505483	0.100742
ENSG00000143341	611.403	0.630814	0.225044	2.80307	0.00506189	0.100802
ENSG00000120279	88.1118	-3.07707	1.09788	-2.80275	0.00506691	0.100822
ENSG00000279989	5.06454	-5.81092	2.0745	-2.80112	0.00509248	0.10125
ENSG00000179331	430.759	-0.643059	0.229681	-2.79979	0.00511352	0.101399
ENSG00000231104	6.0093	4.15641	1.48454	2.7998	0.00511344	0.101399
ENSG00000257727	697.782	0.277361	0.0990708	2.79962	0.00511622	0.101399
ENSG00000075218	1886.99	-0.25125	0.0897409	-2.79973	0.00511459	0.101399
ENSG00000180318	794.447	-0.568575	0.20311	-2.79934	0.00512075	0.101409
ENSG00000234350	45.9215	1.44746	0.517195	2.79868	0.00513123	0.101487
ENSG00000288012	28.5058	1.16059	0.414743	2.79832	0.00513686	0.101487
ENSG00000107954	153.998	-1.46047	0.521905	-2.79834	0.00513656	0.101487
ENSG00000107223	9209.19	-0.187309	0.066979	-2.79654	0.00516534	0.101888
ENSG00000285576	15.8583	-1.65859	0.593045	-2.79674	0.00516208	0.101888
ENSG00000109323	2787.95	-0.315083	0.1127	-2.79578	0.00517753	0.102048
ENSG00000169299	10580.9	-0.181859	0.0651058	-2.79328	0.00521767	0.102758
ENSG00000102038	49158.6	0.245321	0.0878464	2.79261	0.00522849	0.102851
ENSG00000100883	14545.5	0.257183	0.092102	2.79237	0.00523234	0.102851
ENSG00000152443	2181.44	0.465372	0.166667	2.79222	0.00523472	0.102851
ENSG00000172915	2909.38	0.372924	0.133626	2.7908	0.00525781	0.103142
ENSG00000108946	25355.4	0.25594	0.0917019	2.791	0.00525448	0.103142
ENSG00000164830	5130.78	0.538418	0.193117	2.78805	0.00530268	0.103941
ENSG00000289141	4.11882	-4.50358	1.61567	-2.78744	0.0053127	0.104046
ENSG00000206579	1768.51	0.535293	0.192053	2.78721	0.00531635	0.104046
ENSG00000082701	1166.68	-0.379976	0.136346	-2.78685	0.00532226	0.10408
ENSG00000290920	1304.33	-0.754493	0.270778	-2.78639	0.00532984	0.104147
ENSG00000132274	1226.36	0.458269	0.164548	2.78502	0.00535237	0.104505
ENSG00000164093	284.689	0.753137	0.270481	2.78444	0.00536204	0.104612
ENSG00000286339	824.703	-0.533452	0.191607	-2.78409	0.00536781	0.104643
ENSG00000236618	68.0006	-0.613486	0.220379	-2.78378	0.0053729	0.104661
ENSG00000291048	38.6049	-2.49833	0.897667	-2.78314	0.00538358	0.104787
ENSG00000276644	2233.13	0.578427	0.207853	2.78287	0.0053881	0.104793
ENSG00000264247	1497.9	0.30333	0.109067	2.78113	0.00541699	0.105273
ENSG00000157456	9924.5	-0.240444	0.0865614	-2.77772	0.00547409	0.1063
ENSG00000287616	47.161	1.86942	0.673467	2.77582	0.00550632	0.106602
ENSG00000106025	5595.59	0.261468	0.0942018	2.77562	0.00550972	0.106602
ENSG00000275703	4.62085	5.67459	2.0445	2.77554	0.00551097	0.106602
ENSG00000276957	6.16406	5.08909	1.83308	2.77626	0.00549889	0.106602
ENSG00000179455	9.02607	-6.6468	2.39467	-2.77566	0.00550895	0.106602
ENSG00000154127	3304.24	-0.572844	0.206551	-2.77337	0.00554786	0.107233
ENSG00000067064	25427.8	-0.242448	0.0874677	-2.77186	0.00557372	0.107649
ENSG00000168569	1919.08	-0.417848	0.150788	-2.7711	0.00558667	0.107816
ENSG00000143199	909.835	-0.444746	0.16051	-2.77082	0.00559145	0.107825
ENSG00000171861	4547.02	-0.37973	0.137074	-2.77025	0.00560141	0.107934
ENSG00000136160	1248.25	-0.591099	0.213492	-2.76871	0.00562781	0.108276
ENSG00000285663	6.90612	5.26052	1.89993	2.7688	0.00562636	0.108276
ENSG00000196954	250.452	0.799595	0.288897	2.76775	0.00564448	0.108513
ENSG00000265241	5678.58	0.352743	0.127468	2.76731	0.00565204	0.108575
ENSG00000113303	9.00448	-6.64264	2.40138	-2.76618	0.00567179	0.108871
ENSG00000224786	217.598	0.849296	0.307157	2.76502	0.00569192	0.1091
ENSG00000165637	37301.9	-0.259359	0.0938012	-2.76499	0.00569249	0.1091
ENSG00000266916	122.733	0.939019	0.339712	2.76416	0.00570687	0.109292
ENSG00000212135	17.2984	1.23377	0.446388	2.7639	0.00571145	0.109296
ENSG00000121851	651.99	0.492713	0.178317	2.76313	0.00572502	0.109472
ENSG00000091436	8310.5	0.307054	0.111165	2.76216	0.00574208	0.109547
ENSG00000226331	15.5223	2.96747	1.07432	2.76219	0.00574154	0.109547
ENSG00000138640	1956.52	0.343404	0.124321	2.76224	0.00574054	0.109547
ENSG00000170498	5.04212	5.80292	2.10186	2.76085	0.00576516	0.10956
ENSG00000143786	282.777	-1.21	0.438248	-2.761	0.00576254	0.10956
ENSG00000006747	3084	0.357003	0.129276	2.76155	0.00575285	0.10956
ENSG00000006128	1266.81	-0.355482	0.128772	-2.76056	0.00577022	0.10956
ENSG00000164900	5.89637	6.02441	2.18206	2.76088	0.00576454	0.10956
ENSG00000151892	1970.19	0.438746	0.158862	2.7618	0.00574842	0.10956
ENSG00000125691	30344.9	-0.235247	0.0852229	-2.76038	0.00577348	0.10956
ENSG00000125454	985.175	-0.44267	0.160392	-2.75993	0.00578142	0.109628
ENSG00000149043	9.05643	-6.65169	2.41064	-2.7593	0.00579251	0.109755
ENSG00000070814	3876.91	-0.346664	0.12575	-2.75678	0.00583728	0.110519
ENSG00000179348	418.032	-0.693799	0.251869	-2.75461	0.00587622	0.111039
ENSG00000185942	797.51	0.732146	0.265799	2.75451	0.00587805	0.111039
ENSG00000105339	237.975	-0.579303	0.210293	-2.75474	0.0058738	0.111039
ENSG00000165138	841.654	-0.43345	0.157416	-2.75352	0.00589575	0.111047
ENSG00000118971	24823.2	-0.326755	0.118639	-2.7542	0.00588351	0.111047
ENSG00000272515	9.30494	6.68315	2.4271	2.75356	0.00589509	0.111047
ENSG00000093000	12108.9	-0.188585	0.0684895	-2.75349	0.00589627	0.111047
ENSG00000138286	385.32	0.564795	0.20514	2.75322	0.00590122	0.111057
ENSG00000220205	1395.03	0.300394	0.109155	2.75201	0.00592312	0.111385
ENSG00000248318	5.76366	-6.00099	2.18092	-2.75158	0.00593083	0.111446
ENSG00000023228	12698.6	-0.237908	0.0865158	-2.74989	0.00596161	0.11194
ENSG00000172840	1313.64	-0.423765	0.154135	-2.74931	0.00597215	0.112054
ENSG00000137752	8.90331	6.62164	2.41021	2.74733	0.00600834	0.112648
ENSG00000254860	147.802	0.715637	0.260566	2.74647	0.006024	0.112857
ENSG00000229119	564.897	-0.298732	0.108812	-2.74539	0.00604392	0.1129
ENSG00000155666	113.592	-1.41473	0.515271	-2.74559	0.00604014	0.1129
ENSG00000260710	20.93	-2.37583	0.865395	-2.74537	0.00604434	0.1129
ENSG00000223573	908.958	-0.500787	0.182364	-2.74608	0.00603112	0.1129
ENSG00000274093	37.2316	-1.16837	0.425619	-2.74512	0.00604891	0.112901
ENSG00000119661	1423.28	0.342789	0.124896	2.74459	0.00605874	0.113
ENSG00000261742	4.97992	5.78383	2.1079	2.74388	0.00607174	0.113074
ENSG00000211459	42323.3	-0.184728	0.0673228	-2.74391	0.00607119	0.113074
ENSG00000147614	183.237	-0.78975	0.287897	-2.74317	0.00608484	0.113233
ENSG00000229335	138.955	-0.716359	0.261228	-2.74228	0.00610147	0.113458
ENSG00000260392	4.68624	-5.70123	2.07931	-2.74189	0.00610866	0.113507
ENSG00000155545	4306.14	-0.260562	0.0950785	-2.7405	0.00613467	0.113558
ENSG00000251667	20.4658	-1.96324	0.71622	-2.74112	0.00612304	0.113558
ENSG00000254453	18.5631	-2.03758	0.743439	-2.74074	0.00613006	0.113558
ENSG00000151136	248.509	0.888359	0.324185	2.74028	0.00613866	0.113558
ENSG00000268362	913.837	0.337068	0.122969	2.74108	0.00612376	0.113558
ENSG00000280061	54.2744	2.14959	0.784271	2.74088	0.00612743	0.113558
ENSG00000138029	6006.4	-0.233343	0.085198	-2.73883	0.00616586	0.113977
ENSG00000163938	18051.2	-0.184324	0.067328	-2.7377	0.00618701	0.114239
ENSG00000219257	8.58641	-6.57501	2.40175	-2.73759	0.00618918	0.114239
ENSG00000104112	7808.02	0.50411	0.18426	2.73586	0.00622173	0.114755
ENSG00000136448	3312.98	-0.284166	0.103877	-2.73559	0.00622676	0.114763
ENSG00000184432	20660.7	0.202463	0.0740474	2.73424	0.00625247	0.115077
ENSG00000136859	1813.97	1.05079	0.384311	2.73421	0.00625298	0.115077
ENSG00000291111	23.1862	-1.59694	0.584219	-2.73347	0.00626715	0.115253
ENSG00000197085	5.05607	5.80198	2.12299	2.73292	0.00627746	0.115358
ENSG00000196911	1355.99	-0.545391	0.199583	-2.73265	0.00628263	0.115368
ENSG00000152684	5397.66	0.299602	0.109687	2.73143	0.00630601	0.115712
ENSG00000125952	12842	-0.203005	0.0743616	-2.72997	0.00633396	0.116054
ENSG00000212232	98.5778	-0.687291	0.251752	-2.73003	0.00633281	0.116054
ENSG00000132639	8502.87	0.356952	0.130789	2.72922	0.00634848	0.116235
ENSG00000288736	17.84	-2.82106	1.03392	-2.7285	0.00636237	0.116323
ENSG00000186635	72.1193	-1.46408	0.536591	-2.72849	0.00636256	0.116323
ENSG00000285278	65.8597	-1.21251	0.444725	-2.72643	0.00640236	0.116879
ENSG00000100479	842.868	-0.413517	0.151667	-2.72648	0.00640135	0.116879
ENSG00000229037	9.08961	1.59579	0.585363	2.72615	0.00640781	0.116893
ENSG00000162552	153.452	-1.48742	0.545772	-2.72536	0.00642316	0.117003
ENSG00000215388	19.4042	4.22125	1.5488	2.7255	0.0064204	0.117003
ENSG00000075213	4975.82	0.319752	0.117363	2.72447	0.00644056	0.117234
ENSG00000137124	7793.15	-0.75185	0.276059	-2.72351	0.00645931	0.117404
ENSG00000273115	9.59088	3.14104	1.15323	2.72367	0.006456	0.117404
ENSG00000173207	16516.9	-0.348165	0.127975	-2.72058	0.00651672	0.118115
ENSG00000110315	9343.02	0.276758	0.101726	2.72063	0.00651586	0.118115
ENSG00000182256	111.872	1.23593	0.454295	2.72055	0.0065173	0.118115
ENSG00000077009	1072.2	-0.527573	0.19392	-2.72057	0.006517	0.118115
ENSG00000155324	955.997	0.409933	0.150769	2.71895	0.00654904	0.118432
ENSG00000145817	11246.3	0.33131	0.121852	2.71895	0.00654896	0.118432
ENSG00000273145	15.1077	-2.90841	1.06957	-2.71924	0.0065432	0.118432
ENSG00000064042	4857.62	0.362817	0.13348	2.71814	0.00656503	0.11852
ENSG00000248746	33.7977	2.07137	0.762051	2.71816	0.00656467	0.11852
ENSG00000141526	208.849	-1.33563	0.491405	-2.71798	0.0065681	0.11852
ENSG00000179270	7.76489	4.50196	1.65715	2.71668	0.00659394	0.1189
ENSG00000158805	42.4362	-1.11186	0.409537	-2.71493	0.00662902	0.119447
ENSG00000185513	140.785	-0.981862	0.362043	-2.712	0.00668781	0.120337
ENSG00000232560	56.5494	1.4272	0.526255	2.71199	0.00668808	0.120337
ENSG00000163694	6623.06	-0.622758	0.229659	-2.71166	0.00669474	0.12037
ENSG00000260209	26.9848	-1.70623	0.629629	-2.70989	0.00673058	0.120809
ENSG00000151413	1940.7	0.348271	0.128526	2.70974	0.00673365	0.120809
ENSG00000185567	263.929	-1.27136	0.469113	-2.71013	0.0067257	0.120809
ENSG00000225549	187.085	-0.747854	0.276033	-2.70929	0.00674277	0.120886
ENSG00000205903	108.924	-0.882138	0.325747	-2.70805	0.00676807	0.121166
ENSG00000287439	10.5982	5.88648	2.17369	2.70806	0.00676776	0.121166
ENSG00000050165	15748.1	0.571877	0.211251	2.7071	0.00678735	0.121258
ENSG00000165841	8.79453	6.6015	2.43861	2.70708	0.00678775	0.121258
ENSG00000241185	5.58779	4.94153	1.82528	2.70727	0.00678394	0.121258
ENSG00000260095	4.71723	-5.71241	2.11067	-2.70645	0.00680069	0.121402
ENSG00000160991	3467.61	0.443238	0.163816	2.70571	0.00681591	0.121551
ENSG00000236333	279.846	0.817188	0.302039	2.70557	0.00681879	0.121551
ENSG00000261437	101.658	-1.32614	0.490264	-2.70496	0.00683129	0.121688
ENSG00000170873	585.323	0.641798	0.237387	2.70359	0.00685953	0.122017
ENSG00000257511	71.6436	0.97986	0.362406	2.70377	0.00685587	0.122017
ENSG00000227107	4.85737	-5.75342	2.12895	-2.70247	0.0068826	0.122302
ENSG00000168824	16077.7	0.226599	0.0838529	2.70234	0.00688536	0.122302
ENSG00000064999	1299	-0.394704	0.146078	-2.702	0.00689231	0.122339
ENSG00000285579	20.2821	2.59339	0.959908	2.70171	0.00689845	0.122361
ENSG00000172493	1512.75	-0.481665	0.178368	-2.7004	0.00692568	0.122756
ENSG00000280348	8.29119	6.51746	2.41375	2.70014	0.006931	0.122764
ENSG00000233056	1164.1	-0.767926	0.284456	-2.69963	0.00694169	0.122866
ENSG00000007255	2224.49	-0.206388	0.0764651	-2.69911	0.00695248	0.122883
ENSG00000130203	1015.31	-0.398047	0.147467	-2.69923	0.00695008	0.122883
ENSG00000244398	499.904	-0.332097	0.123077	-2.6983	0.00696956	0.123098
ENSG00000095002	21784.2	-0.322424	0.119513	-2.6978	0.00697984	0.123105
ENSG00000251584	20.1141	-2.42464	0.898678	-2.698	0.00697567	0.123105
ENSG00000239268	269.186	0.726018	0.269379	2.69516	0.00703554	0.123304
ENSG00000175895	3376.14	-0.302141	0.112062	-2.69618	0.0070139	0.123304
ENSG00000110721	406.582	-0.573815	0.212896	-2.69528	0.00703292	0.123304
ENSG00000220842	698.11	-0.234163	0.0868286	-2.69684	0.00700003	0.123304
ENSG00000139266	268.938	0.5206	0.193116	2.69579	0.00702221	0.123304
ENSG00000129636	6210.82	0.208236	0.0772618	2.6952	0.00703464	0.123304
ENSG00000262904	112.075	1.19671	0.443924	2.69576	0.00702285	0.123304
ENSG00000267474	4.34009	-5.5919	2.07415	-2.696	0.00701783	0.123304
ENSG00000204519	2081.63	0.369668	0.137157	2.69521	0.00703446	0.123304
ENSG00000169282	600.093	0.713049	0.264608	2.69474	0.00704436	0.123373
ENSG00000272862	31.4047	2.34413	0.870214	2.69374	0.00706557	0.123657
ENSG00000076356	433.886	-0.839516	0.311706	-2.69329	0.00707501	0.123736
ENSG00000167635	12449.9	-0.348348	0.129385	-2.69234	0.00709521	0.124002
ENSG00000169926	406.304	-0.469105	0.174254	-2.69208	0.00710082	0.124014
ENSG00000281021	26.3374	-1.76873	0.657306	-2.69088	0.00712641	0.124219
ENSG00000259234	4.53723	4.63526	1.7226	2.69085	0.00712708	0.124219
ENSG00000213339	2446.82	-0.275893	0.102531	-2.69083	0.00712747	0.124219
ENSG00000258227	5.01594	-5.79546	2.15453	-2.68989	0.00714745	0.12448
ENSG00000124831	11015.8	-0.534554	0.198835	-2.68843	0.00717886	0.12494
ENSG00000042493	9108.57	-0.575713	0.214226	-2.68741	0.00720083	0.125099
ENSG00000153291	106.61	1.25371	0.466531	2.68731	0.00720298	0.125099
ENSG00000122691	106.927	-0.885384	0.329414	-2.68776	0.00719337	0.125099
ENSG00000170364	1977.73	0.46367	0.172574	2.68679	0.00721422	0.125203
ENSG00000128573	522.567	0.982719	0.36579	2.68657	0.00721904	0.125203
ENSG00000101349	307.936	0.806044	0.300193	2.68509	0.00725113	0.125673
ENSG00000139505	10220.5	0.220905	0.0823134	2.6837	0.00728122	0.126107
ENSG00000162664	3953.79	0.239055	0.0891211	2.68236	0.00731046	0.126273
ENSG00000091181	17.1781	4.10684	1.53125	2.68202	0.00731794	0.126273
ENSG00000227398	172.206	0.810154	0.302085	2.68187	0.00732113	0.126273
ENSG00000145416	433.553	0.720279	0.268518	2.68243	0.00730901	0.126273
ENSG00000203778	1720.32	0.267809	0.0998287	2.68269	0.00730332	0.126273
ENSG00000212901	198.987	0.682961	0.254625	2.68223	0.0073134	0.126273
ENSG00000289480	141.498	1.38928	0.518981	2.67695	0.0074296	0.128055
ENSG00000144285	106.498	1.74146	0.650634	2.67656	0.00743816	0.128115
ENSG00000005801	12661.6	-0.164307	0.0614385	-2.67433	0.00748788	0.128882
ENSG00000116191	3221.17	0.275005	0.102864	2.67348	0.00750697	0.128945
ENSG00000271576	120.304	0.915973	0.342597	2.67362	0.00750377	0.128945
ENSG00000237923	25.5232	-2.34255	0.876146	-2.6737	0.00750196	0.128945
ENSG00000185261	887.776	0.718126	0.268705	2.67254	0.00752792	0.129127
ENSG00000184216	657.032	-0.53566	0.200415	-2.67275	0.00752313	0.129127
ENSG00000135409	60.7251	-1.22738	0.45957	-2.67072	0.00756886	0.12974
ENSG00000146006	294.706	0.772941	0.289526	2.66968	0.00759246	0.129788
ENSG00000166260	5605.19	0.300546	0.112559	2.67013	0.00758215	0.129788
ENSG00000073350	392.882	-1.01181	0.378974	-2.66985	0.0075884	0.129788
ENSG00000287241	4.60547	5.66531	2.12191	2.66991	0.00758719	0.129788
ENSG00000273306	43.4674	1.47903	0.554177	2.66888	0.00761054	0.130009
ENSG00000137947	2906.19	0.200845	0.075313	2.66681	0.0076576	0.13051
ENSG00000116478	21233.1	-0.149406	0.0560248	-2.66678	0.00765823	0.13051
ENSG00000109738	592.383	0.595802	0.223426	2.66667	0.00766077	0.13051
ENSG00000249343	4.27869	5.56825	2.08793	2.66688	0.0076559	0.13051
ENSG00000204516	1653.75	-0.58081	0.21785	-2.66611	0.00767351	0.130638
ENSG00000134253	1168.21	-0.462353	0.17345	-2.66563	0.00768437	0.130734
ENSG00000235750	3511.98	-0.635059	0.23829	-2.66507	0.00769721	0.130809
ENSG00000105982	106.884	0.78758	0.295529	2.66498	0.00769929	0.130809
ENSG00000228649	375.708	-0.953312	0.357806	-2.66433	0.00771429	0.130887
ENSG00000100116	1786.01	-0.663222	0.248927	-2.66432	0.00771431	0.130887
ENSG00000139946	3540.32	0.366927	0.13774	2.6639	0.00772395	0.130961
ENSG00000196767	5.38311	5.89269	2.21334	2.66235	0.00775961	0.131477
ENSG00000140287	23.1232	7.99725	3.00442	2.66183	0.00777169	0.131592
ENSG00000163141	636.689	0.550887	0.207004	2.66124	0.00778541	0.131735
ENSG00000164100	177.325	1.03438	0.388741	2.66084	0.00779463	0.131802
ENSG00000142949	3022.29	-0.314476	0.118209	-2.66034	0.00780621	0.131909
ENSG00000179958	9401.58	-0.169746	0.0638294	-2.65938	0.00782854	0.132197
ENSG00000158769	4149.43	-0.425113	0.159922	-2.65826	0.00785462	0.132547
ENSG00000176095	545.34	-1.00634	0.378701	-2.65734	0.0078759	0.132817
ENSG00000132467	2310.68	0.300816	0.113247	2.65628	0.00790089	0.133148
ENSG00000112539	72.4924	1.6309	0.614038	2.65603	0.00790666	0.133156
ENSG00000254896	9.05949	6.64731	2.50325	2.65548	0.00791964	0.133285
ENSG00000149292	609.38	0.553042	0.208338	2.65454	0.00794166	0.133565
ENSG00000225616	424.437	-0.295437	0.111316	-2.65405	0.00795328	0.133671
ENSG00000185641	666.512	-0.265224	0.0999515	-2.65353	0.00796553	0.133697
ENSG00000176749	411.968	0.705143	0.265727	2.65364	0.00796285	0.133697
ENSG00000140948	442.808	-0.794377	0.299445	-2.65283	0.00798196	0.133883
ENSG00000178031	30.073	-1.92692	0.726459	-2.65248	0.00799025	0.133932
ENSG00000223883	36.4951	1.48094	0.558711	2.65063	0.00803414	0.134089
ENSG00000284753	654.24	-0.337203	0.127202	-2.65092	0.00802719	0.134089
ENSG00000197822	6173.48	-0.36218	0.136676	-2.64991	0.00805129	0.134089
ENSG00000197258	48.0008	-0.705192	0.266122	-2.64988	0.00805193	0.134089
ENSG00000235447	26.5055	3.21995	1.21437	2.65154	0.00801252	0.134089
ENSG00000230590	4019.5	0.571614	0.215712	2.64989	0.00805188	0.134089
ENSG00000197191	534.919	-0.706843	0.266657	-2.65075	0.00803123	0.134089
ENSG00000181333	79.0903	1.02836	0.387893	2.65115	0.00802171	0.134089
ENSG00000095585	218.959	-0.853753	0.322159	-2.6501	0.00804686	0.134089
ENSG00000237515	612.115	0.573361	0.216377	2.64983	0.00805328	0.134089
ENSG00000106392	10048.9	-0.233752	0.0882273	-2.64943	0.00806269	0.134156
ENSG00000288868	91.8639	1.15859	0.43788	2.6459	0.00814739	0.135295
ENSG00000038382	1026	-0.499559	0.188795	-2.64604	0.00814413	0.135295
ENSG00000104320	4526.28	0.317123	0.119849	2.64603	0.00814425	0.135295
ENSG00000163082	64.7557	1.34006	0.506916	2.64355	0.00820406	0.135696
ENSG00000132466	8416.53	0.283331	0.107175	2.64364	0.00820188	0.135696
ENSG00000286985	35.6815	2.02391	0.7654	2.64425	0.00818722	0.135696
ENSG00000184363	146.761	-1.216	0.459927	-2.64389	0.00819582	0.135696
ENSG00000255302	26688.8	0.305011	0.115334	2.64458	0.00817924	0.135696
ENSG00000102893	10358.5	0.226088	0.0855042	2.64417	0.00818915	0.135696
ENSG00000289202	8.4733	6.54779	2.47715	2.64327	0.00821086	0.135718
ENSG00000145715	2085.93	0.452268	0.171125	2.64292	0.00821953	0.135772
ENSG00000290989	362.505	-0.458633	0.173606	-2.64181	0.00824644	0.135947
ENSG00000101871	10724.1	-0.319231	0.120833	-2.64193	0.00824354	0.135947
ENSG00000105509	294.815	-1.68469	0.637651	-2.64202	0.00824138	0.135947
ENSG00000105821	3741.06	0.232728	0.0881022	2.64157	0.00825236	0.135955
ENSG00000128891	862.656	-0.267742	0.101381	-2.64093	0.00826781	0.136119
ENSG00000163535	3263.42	-0.436055	0.165303	-2.63791	0.00834183	0.136797
ENSG00000286509	5.76868	3.99667	1.5148	2.63842	0.00832943	0.136797
ENSG00000164587	113854	-0.226194	0.0857436	-2.63803	0.00833903	0.136797
ENSG00000289894	43.0542	-1.39258	0.527852	-2.6382	0.0083347	0.136797
ENSG00000279641	8.09844	3.97118	1.50524	2.63823	0.00833392	0.136797
ENSG00000130255	20319.1	-0.248917	0.0943361	-2.63862	0.0083244	0.136797
ENSG00000143067	558.424	-0.473741	0.179658	-2.63691	0.00836655	0.137113
ENSG00000135678	1120.49	0.343161	0.130163	2.63639	0.00837944	0.137234
ENSG00000269837	229.762	0.604578	0.229364	2.63589	0.00839165	0.137344
ENSG00000285763	57.6402	1.54455	0.586328	2.63428	0.00843158	0.137681
ENSG00000147576	114.117	-0.846458	0.321299	-2.63449	0.00842649	0.137681
ENSG00000171723	1577.64	0.745836	0.283139	2.63417	0.00843429	0.137681
ENSG00000267508	307.488	-0.7893	0.299623	-2.63431	0.00843077	0.137681
ENSG00000174917	2133.15	-0.233078	0.088495	-2.6338	0.00844364	0.137744
ENSG00000243469	7.78592	-6.43231	2.44301	-2.63294	0.00846482	0.137999
ENSG00000162692	9.01496	6.63704	2.52163	2.63204	0.00848741	0.138277
ENSG00000100918	1028.28	-0.871928	0.331355	-2.6314	0.00850334	0.138415
ENSG00000063177	25872.7	-0.279711	0.106303	-2.63126	0.00850692	0.138415
ENSG00000165186	344.086	-0.999587	0.379996	-2.63052	0.00852552	0.138447
ENSG00000231806	1102.84	0.344872	0.13109	2.6308	0.00851847	0.138447
ENSG00000157326	1063.15	0.224761	0.0854389	2.63067	0.00852173	0.138447
ENSG00000258752	46.3042	-1.80509	0.686731	-2.62852	0.00857564	0.13917
ENSG00000289518	4.46483	-5.62953	2.14209	-2.62805	0.00858748	0.139272
ENSG00000272674	522.075	0.758897	0.288959	2.62631	0.00863155	0.139805
ENSG00000291006	2908.65	0.339439	0.129237	2.62649	0.00862696	0.139805
ENSG00000166341	11.6934	2.77011	1.05511	2.62542	0.00865432	0.140083
ENSG00000103522	9.27293	-5.02258	1.91368	-2.62456	0.00867609	0.140345
ENSG00000180979	2654.65	0.305593	0.116454	2.62416	0.00868633	0.14042
ENSG00000224326	8.67847	3.66492	1.39694	2.62354	0.00870213	0.140508
ENSG00000179262	3778.13	-0.427733	0.163039	-2.6235	0.00870304	0.140508
ENSG00000176953	950.959	-0.553166	0.210973	-2.62198	0.00874206	0.141047
ENSG00000224114	2134.63	-0.206167	0.0786796	-2.62034	0.00878431	0.141319
ENSG00000107404	89.1054	-0.912416	0.348199	-2.62038	0.00878313	0.141319
ENSG00000102271	3186.6	0.514686	0.196428	2.62022	0.00878719	0.141319
ENSG00000164796	761.001	0.552357	0.210747	2.62095	0.00876856	0.141319
ENSG00000186998	40.7178	0.988214	0.37712	2.62043	0.008782	0.141319
ENSG00000136156	35517.7	0.462652	0.176703	2.61824	0.00883834	0.14205
ENSG00000196365	562.121	-0.851686	0.325409	-2.61727	0.00886352	0.142363
ENSG00000250508	7.64462	-6.40575	2.44847	-2.61623	0.00889073	0.142617
ENSG00000196132	252.63	0.6964	0.266164	2.61643	0.00888538	0.142617
ENSG00000235661	6.06898	-4.36945	1.67034	-2.6159	0.00889935	0.142664
ENSG00000002549	8572.3	0.15977	0.0610874	2.61543	0.0089115	0.142767
ENSG00000120318	155.373	-1.08699	0.416135	-2.61211	0.00899846	0.144068
ENSG00000011677	441.127	0.859533	0.329153	2.61134	0.00901869	0.144299
ENSG00000280007	9.56759	4.23669	1.62314	2.61017	0.0090496	0.144701
ENSG00000153339	1149.4	-0.49257	0.188841	-2.60838	0.00909722	0.145369
ENSG00000134193	7.08633	3.59976	1.38151	2.60567	0.00916941	0.146429
ENSG00000122952	24551.9	0.197291	0.0757296	2.60521	0.00918188	0.146535
ENSG00000146830	378.907	-0.622864	0.239208	-2.60385	0.00921819	0.14702
ENSG00000112246	1344.89	0.703464	0.270234	2.60317	0.00923665	0.147221
ENSG00000110031	475.312	0.639271	0.245622	2.60266	0.00925034	0.147345
ENSG00000171150	1438.13	-0.396273	0.152284	-2.60219	0.00926297	0.147452
ENSG00000272211	6.10918	-4.3088	1.65634	-2.6014	0.00928455	0.147697
ENSG00000092140	6617.78	-0.34425	0.132343	-2.60119	0.00929019	0.147697
ENSG00000226005	365.997	-0.661816	0.254511	-2.60035	0.00931289	0.14787
ENSG00000205426	36.1767	-2.51852	0.968504	-2.60042	0.00931092	0.14787
ENSG00000168952	1698.71	0.424018	0.163094	2.59984	0.00932681	0.147997
ENSG00000025800	14762.1	-0.17151	0.0659824	-2.59933	0.00934067	0.148123
ENSG00000169155	3692.56	-0.217723	0.0838083	-2.59788	0.00938025	0.148656
ENSG00000001626	3630.65	0.307124	0.118264	2.59694	0.00940584	0.148968
ENSG00000239305	258.051	0.817383	0.314788	2.59661	0.00941484	0.149016
ENSG00000279069	115.109	0.746396	0.287535	2.59585	0.0094358	0.149253
ENSG00000142675	158.141	-1.58188	0.609667	-2.59466	0.00946845	0.149306
ENSG00000020129	209.464	0.99269	0.382531	2.59506	0.00945751	0.149306
ENSG00000198626	1291.16	0.836701	0.322452	2.5948	0.00946448	0.149306
ENSG00000169439	6737.18	0.507715	0.195665	2.59482	0.00946402	0.149306
ENSG00000109084	36784.9	-0.129753	0.050008	-2.59464	0.00946901	0.149306
ENSG00000247950	171.398	0.856779	0.330267	2.5942	0.00948113	0.149402
ENSG00000175793	5375.64	-0.832143	0.3208	-2.59396	0.00948778	0.149413
ENSG00000206573	3464.7	0.436966	0.168473	2.59368	0.00949558	0.149442
ENSG00000267454	306.064	-0.742723	0.28639	-2.5934	0.0095033	0.149469
ENSG00000106546	1149.86	-0.372574	0.143693	-2.59285	0.00951837	0.149518
ENSG00000104415	8.38834	-6.54152	2.5229	-2.59286	0.00951823	0.149518
ENSG00000163875	8375.2	0.201455	0.07771	2.59239	0.00953113	0.149624
ENSG00000212802	940.595	-0.234021	0.090315	-2.59117	0.00956515	0.150058
ENSG00000165821	584.67	0.628553	0.242594	2.59096	0.00957076	0.150058
ENSG00000252291	4.19003	-3.6826	1.42165	-2.59037	0.0095874	0.150225
ENSG00000237978	76.7467	-1.11569	0.430778	-2.58995	0.00959909	0.150314
ENSG00000113645	851.234	-0.462733	0.178712	-2.58927	0.00961797	0.150433
ENSG00000067445	4999.82	0.464216	0.179287	2.58924	0.00961876	0.150433
ENSG00000243663	10.6072	-3.19124	1.23292	-2.58835	0.00964363	0.150728
ENSG00000261838	64.0671	-0.918474	0.355004	-2.58722	0.00967527	0.151128
ENSG00000095485	2869.71	0.224771	0.0869212	2.58592	0.00971206	0.151608
ENSG00000130921	2635.9	-0.383924	0.148508	-2.58521	0.00973203	0.151824
ENSG00000100711	6053.41	-0.141581	0.0547757	-2.58474	0.00974531	0.151937
ENSG00000154274	198.927	-0.995759	0.385364	-2.58394	0.00976777	0.152192
ENSG00000151135	3028.4	0.287562	0.111354	2.5824	0.00981152	0.152778
ENSG00000146223	13773.9	-0.250843	0.0971777	-2.58128	0.00984336	0.153004
ENSG00000255451	7.37285	6.34789	2.45915	2.58134	0.00984183	0.153004
ENSG00000172269	3324.82	-0.278323	0.107825	-2.58125	0.00984434	0.153004
ENSG00000243004	63.7529	-1.15306	0.44681	-2.58066	0.00986127	0.153171
ENSG00000178229	295.777	-0.731434	0.283497	-2.58004	0.00987884	0.153349
ENSG00000203667	103.842	0.446922	0.17327	2.57934	0.00989891	0.153565
ENSG00000163116	7.92901	-6.45981	2.50503	-2.57874	0.00991614	0.153737
ENSG00000166938	3637.13	0.350514	0.135963	2.578	0.00993726	0.153969
ENSG00000117597	2766.35	-0.419508	0.16278	-2.57714	0.00996203	0.154006
ENSG00000144642	3461.05	0.435401	0.168966	2.57685	0.00997046	0.154006
ENSG00000149218	1621.07	-0.417273	0.161929	-2.57689	0.00996938	0.154006
ENSG00000245532	1178.51	-0.639016	0.247951	-2.57718	0.00996086	0.154006
ENSG00000166262	518.843	0.387471	0.150318	2.57767	0.00994688	0.154006
ENSG00000223764	28.0855	1.36977	0.531691	2.57625	0.00998791	0.154147
ENSG00000105983	1556.59	0.55865	0.216858	2.57611	0.00999192	0.154147
ENSG00000119760	4818.67	0.275482	0.106959	2.57558	0.0100072	0.154287
ENSG00000173517	1673.19	0.286036	0.111143	2.57357	0.0100654	0.15509
ENSG00000169255	2550.74	0.386248	0.150097	2.57332	0.0100729	0.155104
ENSG00000086717	254.906	0.805328	0.312978	2.57312	0.0100788	0.155104
ENSG00000138068	5.13756	4.81884	1.87296	2.57285	0.0100866	0.155128
ENSG00000164616	511.665	-0.515046	0.200206	-2.57257	0.0100945	0.155156
ENSG00000213468	4547	-0.187913	0.0730872	-2.57107	0.0101384	0.155733
ENSG00000169213	6552.06	-0.249183	0.0969705	-2.56968	0.0101793	0.156266
ENSG00000165169	3301.31	-0.380903	0.148346	-2.56767	0.0102385	0.157056
ENSG00000064270	690.424	-0.667514	0.259986	-2.56751	0.0102433	0.157056
ENSG00000145824	5732.43	0.522366	0.203492	2.56701	0.0102581	0.157089
ENSG00000289303	4.01	5.47312	2.13207	2.56705	0.0102569	0.157089
ENSG00000083520	7035.19	0.373552	0.145596	2.56567	0.0102977	0.1576
ENSG00000228878	239.999	0.817462	0.318667	2.56525	0.0103101	0.157692
ENSG00000234797	819.9	-0.317374	0.123739	-2.56485	0.0103219	0.157777
ENSG00000185477	725.251	0.65056	0.253755	2.56374	0.0103552	0.158047
ENSG00000123572	601.646	0.638487	0.249056	2.56362	0.0103585	0.158047
ENSG00000140682	194.649	-1.07493	0.419285	-2.56372	0.0103557	0.158047
ENSG00000164265	30.562	-2.78078	1.08492	-2.56313	0.0103734	0.158081
ENSG00000175600	1167.32	0.432857	0.168878	2.56313	0.0103732	0.158081
ENSG00000103257	2994.34	-0.481534	0.187891	-2.56284	0.0103821	0.158117
ENSG00000187840	19955.5	-0.329515	0.128587	-2.56259	0.0103894	0.158132
ENSG00000263400	9.40102	5.70428	2.22804	2.56022	0.0104606	0.159118
ENSG00000266338	1392.75	-0.29581	0.115584	-2.55926	0.0104895	0.159293
ENSG00000286136	76.5399	1.50411	0.587772	2.55899	0.0104976	0.159293
ENSG00000267055	10.7386	-2.3587	0.921682	-2.55913	0.0104936	0.159293
ENSG00000228376	20.6448	2.5821	1.00888	2.55938	0.0104859	0.159293
ENSG00000101844	6450.37	0.342776	0.134042	2.55722	0.0105513	0.16001
ENSG00000105887	6895.49	0.208902	0.0817072	2.55672	0.0105664	0.160046
ENSG00000141750	14.4312	-2.92252	1.14305	-2.55678	0.0105645	0.160046
ENSG00000172020	28139.4	0.442765	0.173191	2.55651	0.0105729	0.160048
ENSG00000128951	2832.74	-0.277287	0.10849	-2.55587	0.0105922	0.160242
ENSG00000144278	513.317	0.876994	0.343341	2.5543	0.0106403	0.160873
ENSG00000134049	3785.34	0.311546	0.121997	2.55372	0.0106578	0.161039
ENSG00000243659	11.909	2.33789	0.915994	2.55229	0.0107016	0.161485
ENSG00000138443	9373.45	0.236255	0.0925659	2.55229	0.0107018	0.161485
ENSG00000291106	1664.82	0.327045	0.128156	2.55192	0.0107131	0.161485
ENSG00000196569	292.127	0.884301	0.346503	2.55207	0.0107085	0.161485
ENSG00000140505	28.3719	3.75542	1.4719	2.55142	0.0107285	0.161553
ENSG00000258754	12.6705	4.25265	1.66682	2.55135	0.0107305	0.161553
ENSG00000108733	388.373	0.651482	0.255441	2.55042	0.0107593	0.161888
ENSG00000166387	1015.04	-0.638423	0.250416	-2.54945	0.0107894	0.162243
ENSG00000265107	1767.59	-0.562465	0.220726	-2.54824	0.0108267	0.162707
ENSG00000158019	2401.65	0.234221	0.0919427	2.54747	0.0108508	0.162852
ENSG00000221962	8.01971	-4.80474	1.88678	-2.54653	0.0108801	0.162852
ENSG00000251205	7.34224	6.34345	2.49072	2.54684	0.0108705	0.162852
ENSG00000230852	8.87081	-4.79493	1.88297	-2.54646	0.010882	0.162852
ENSG00000224531	458.62	-0.490898	0.192731	-2.54706	0.0108634	0.162852
ENSG00000290872	205.805	0.698028	0.274039	2.54718	0.0108596	0.162852
ENSG00000285933	9.00327	4.80577	1.88679	2.54706	0.0108633	0.162852
ENSG00000132423	943.744	0.285468	0.112128	2.54592	0.010899	0.163008
ENSG00000171227	1017.61	0.588157	0.231144	2.54454	0.010942	0.16313
ENSG00000056050	4199.17	0.303519	0.11927	2.54482	0.0109335	0.16313
ENSG00000089127	89.3163	1.66672	0.655027	2.54451	0.010943	0.16313
ENSG00000108666	2497.9	0.199242	0.0783122	2.5442	0.0109528	0.16313
ENSG00000149474	4984.36	-0.359723	0.141368	-2.54459	0.0109407	0.16313
ENSG00000270804	38.0493	-0.787772	0.309592	-2.54455	0.0109418	0.16313
ENSG00000100129	17605.3	-0.165926	0.0652167	-2.54423	0.0109519	0.16313
ENSG00000173320	1758.71	0.366995	0.144282	2.54359	0.0109718	0.163219
ENSG00000067992	4417.11	-0.217895	0.0856621	-2.54366	0.0109698	0.163219
ENSG00000158158	312.359	-0.511703	0.201237	-2.54279	0.0109972	0.163444
ENSG00000167840	4044.01	-0.237554	0.0934262	-2.5427	0.0110001	0.163444
ENSG00000102898	26401.4	0.252868	0.0994672	2.54223	0.0110149	0.163567
ENSG00000269889	10.3775	2.13848	0.841299	2.54188	0.0110257	0.163631
ENSG00000115020	1821.67	-0.550033	0.216431	-2.54138	0.0110415	0.163768
ENSG00000105514	1908.61	0.257827	0.101496	2.54027	0.0110766	0.164192
ENSG00000255310	1068.56	0.485414	0.191192	2.53888	0.0111207	0.164748
ENSG00000138083	728.103	0.485095	0.191114	2.53825	0.0111409	0.164851
ENSG00000260284	5.83044	-3.40808	1.34266	-2.5383	0.0111392	0.164851
ENSG00000137819	160.565	-0.674914	0.266057	-2.53673	0.0111893	0.16547
ENSG00000156675	2860.94	-0.521995	0.205818	-2.5362	0.0112064	0.165624
ENSG00000160932	57276.6	-0.547958	0.216167	-2.53488	0.0112486	0.16615
ENSG00000178722	9.65416	4.61308	1.82009	2.53453	0.0112598	0.166217
ENSG00000118898	1795.78	-0.557246	0.219911	-2.53396	0.0112781	0.166388
ENSG00000139323	5836.23	-0.237631	0.0938064	-2.53321	0.0113024	0.166649
ENSG00000175575	4796.7	-0.279827	0.110476	-2.53291	0.0113119	0.16669
ENSG00000135828	376.604	0.738436	0.291916	2.52962	0.0114186	0.168077
ENSG00000247556	9451.97	-0.287601	0.113694	-2.52959	0.0114195	0.168077
ENSG00000071575	3080.04	0.48747	0.19278	2.52864	0.0114507	0.168438
ENSG00000255222	7.9174	6.45013	2.55178	2.5277	0.0114812	0.168787
ENSG00000256525	1212.76	-0.369543	0.146214	-2.52741	0.0114907	0.168827
ENSG00000227708	4.32251	5.57768	2.20724	2.52699	0.0115045	0.168832
ENSG00000287865	6.73523	-6.22476	2.46314	-2.52716	0.0114988	0.168832
ENSG00000151366	3167.18	0.235223	0.0931302	2.52574	0.0115454	0.169186
ENSG00000256019	4.04374	-5.48645	2.17227	-2.52567	0.0115478	0.169186
ENSG00000100442	19227.9	0.285588	0.113076	2.52563	0.0115489	0.169186
ENSG00000139679	1772.2	0.388005	0.153653	2.5252	0.0115632	0.169296
ENSG00000115112	810.061	-1.04319	0.413208	-2.52461	0.0115825	0.16938
ENSG00000188582	147.012	0.831868	0.329486	2.52474	0.0115783	0.16938
ENSG00000223382	44.8388	-0.997735	0.395281	-2.52411	0.011599	0.169522
ENSG00000211751	347.112	-0.338902	0.134289	-2.52367	0.0116136	0.169636
ENSG00000103160	5229.88	0.409935	0.162516	2.52243	0.0116548	0.170138
ENSG00000254893	80.4946	0.533764	0.211761	2.5206	0.0117155	0.170825
ENSG00000199977	21.0515	-1.50173	0.595777	-2.52063	0.0117146	0.170825
ENSG00000273760	30.7864	-1.76992	0.702273	-2.52027	0.0117265	0.170885
ENSG00000178235	1284.81	0.627665	0.249112	2.51961	0.0117485	0.171107
ENSG00000198690	2377.07	-0.340089	0.135058	-2.5181	0.0117989	0.17174
ENSG00000138722	147.394	1.90871	0.758277	2.51716	0.0118305	0.171807
ENSG00000177182	431.694	0.539731	0.214387	2.51755	0.0118174	0.171807
ENSG00000221946	350.678	0.736683	0.292666	2.51715	0.0118309	0.171807
ENSG00000100221	702.766	-0.529325	0.210284	-2.51719	0.0118295	0.171807
ENSG00000272754	11.6062	-2.51834	1.00128	-2.51513	0.0118989	0.172593
ENSG00000145287	259.704	0.528622	0.210162	2.51531	0.0118928	0.172593
ENSG00000165124	122.252	-0.774054	0.307791	-2.51487	0.0119076	0.172618
ENSG00000171492	2228.57	-0.369706	0.147023	-2.51462	0.0119162	0.172644
ENSG00000278974	162.098	0.493217	0.196165	2.5143	0.0119269	0.172699
ENSG00000260588	67.1412	1.09808	0.436929	2.51318	0.0119647	0.173145
ENSG00000271897	6.43516	4.22592	1.68237	2.51188	0.0120089	0.173684
ENSG00000134333	33466.7	-0.247705	0.0986329	-2.51138	0.0120261	0.173832
ENSG00000023839	240.974	-1.50379	0.598868	-2.51105	0.0120372	0.173892
ENSG00000160813	197.288	-0.540796	0.21546	-2.50996	0.0120746	0.17413
ENSG00000173914	4157.04	0.290826	0.115857	2.51023	0.0120654	0.17413
ENSG00000257818	18.2298	-3.53314	1.40761	-2.51003	0.012072	0.17413
ENSG00000230364	6.01989	-4.01191	1.59876	-2.50939	0.0120939	0.174155
ENSG00000155849	4774.76	0.336366	0.134048	2.5093	0.0120972	0.174155
ENSG00000050405	17179.3	-0.231548	0.0922751	-2.50933	0.0120962	0.174155
ENSG00000170961	519.976	-0.85028	0.3389	-2.50894	0.0121094	0.17423
ENSG00000219470	7.65356	2.79679	1.11493	2.50848	0.012125	0.17424
ENSG00000133328	9.70255	3.67598	1.4655	2.50834	0.0121299	0.17424
ENSG00000257893	7.48439	6.36749	2.53856	2.50831	0.012131	0.17424
ENSG00000290782	355.729	0.643331	0.256606	2.50708	0.0121734	0.174748
ENSG00000197965	38225.6	-0.46204	0.184318	-2.50676	0.0121845	0.174808
ENSG00000111801	11.1811	-6.4611	2.57779	-2.50645	0.0121952	0.17486
ENSG00000176971	67.3685	-2.53715	1.01294	-2.50475	0.0122539	0.175602
ENSG00000188039	10.0052	-5.06177	2.02119	-2.50435	0.0122677	0.175699
ENSG00000233611	320.478	-0.361643	0.144525	-2.50228	0.0123395	0.176524
ENSG00000267390	81.8227	0.84648	0.338271	2.50237	0.0123365	0.176524
ENSG00000204380	6.99017	6.27391	2.50761	2.50195	0.0123511	0.176589
ENSG00000188732	1286.75	0.518709	0.207397	2.50105	0.0123825	0.176938
ENSG00000101336	129.911	-1.1902	0.476038	-2.50023	0.0124114	0.177249
ENSG00000227354	359.989	0.561653	0.224709	2.49946	0.0124382	0.17753
ENSG00000223751	48.5933	1.813	0.725424	2.49923	0.0124463	0.177544
ENSG00000145934	397.661	0.803485	0.321521	2.49901	0.012454	0.177554
ENSG00000213366	663.997	0.47227	0.189081	2.49771	0.0125	0.178107
ENSG00000122641	632.196	-0.711865	0.285181	-2.49618	0.0125538	0.178772
ENSG00000283167	5.15656	-2.66617	1.06848	-2.49529	0.0125853	0.179118
ENSG00000165699	3426.97	-0.368419	0.147673	-2.49484	0.0126015	0.179247
ENSG00000274840	43.4858	-0.975935	0.391759	-2.49116	0.0127326	0.180915
ENSG00000166342	77.0006	1.25994	0.505768	2.49114	0.0127333	0.180915
ENSG00000172073	183.345	-0.721037	0.289483	-2.49077	0.0127466	0.180948
ENSG00000172974	244.828	-0.363227	0.145835	-2.49067	0.0127503	0.180948
ENSG00000140534	255.052	-0.781094	0.313633	-2.49047	0.0127573	0.180948
ENSG00000171476	148.251	1.13274	0.455247	2.48819	0.0128396	0.181711
ENSG00000232759	388.165	-0.470621	0.189098	-2.48877	0.0128186	0.181711
ENSG00000026103	9356.06	0.30896	0.124152	2.48857	0.0128258	0.181711
ENSG00000087301	5781.05	0.322043	0.129429	2.48817	0.0128402	0.181711
ENSG00000101850	1183.81	-0.404015	0.162453	-2.48696	0.012884	0.182228
ENSG00000143669	1087.95	0.608671	0.244785	2.48656	0.0128986	0.182291
ENSG00000124827	6.62896	-6.20129	2.49415	-2.48634	0.0129066	0.182291
ENSG00000129757	4891.23	-0.625926	0.251757	-2.48623	0.0129103	0.182291
ENSG00000171121	34.1051	-0.880622	0.354246	-2.4859	0.0129224	0.182358
ENSG00000229388	18.4293	1.43914	0.579088	2.48518	0.0129487	0.182523
ENSG00000168004	174.763	-1.72292	0.693257	-2.48526	0.0129456	0.182523
ENSG00000163354	7.73659	-5.43679	2.18819	-2.48461	0.0129694	0.182713
ENSG00000163728	2967.58	0.42069	0.169361	2.48399	0.0129921	0.182835
ENSG00000174469	27653.4	0.328434	0.132238	2.48366	0.0130038	0.182835
ENSG00000133872	22693.9	0.129537	0.052151	2.48388	0.0129958	0.182835
ENSG00000173253	6.61704	-6.19872	2.49589	-2.48357	0.0130074	0.182835
ENSG00000188693	11.0483	-1.89305	0.762374	-2.4831	0.0130245	0.182972
ENSG00000018625	581.709	0.552546	0.22263	2.4819	0.0130683	0.183044
ENSG00000205086	92.8536	1.17122	0.471774	2.48258	0.0130435	0.183044
ENSG00000168843	264.857	0.67192	0.27068	2.48234	0.0130522	0.183044
ENSG00000168453	4.87779	-4.73993	1.90933	-2.4825	0.0130463	0.183044
ENSG00000257839	46.6463	2.3071	0.929545	2.48197	0.0130659	0.183044
ENSG00000286682	26.5544	1.65759	0.66791	2.48176	0.0130735	0.183044
ENSG00000161526	10814.8	-0.173614	0.0700242	-2.47935	0.0131624	0.184185
ENSG00000177045	4.50489	-4.14762	1.67357	-2.47831	0.0132007	0.184618
ENSG00000115596	125.446	-0.674293	0.272155	-2.47761	0.0132267	0.184878
ENSG00000198961	18053.7	0.224129	0.0904955	2.47669	0.0132609	0.185252
ENSG00000114125	7802.52	-0.167328	0.0675775	-2.47608	0.0132832	0.18546
ENSG00000230433	20.6679	-2.24926	0.908662	-2.47535	0.0133105	0.185737
ENSG00000137713	15477.7	0.233435	0.0943156	2.47504	0.0133222	0.185798
ENSG00000197982	1486.56	0.302015	0.122038	2.47476	0.0133327	0.18584
ENSG00000204518	6.35684	-6.14118	2.48228	-2.474	0.0133609	0.186129
ENSG00000141564	145.147	-0.864492	0.349509	-2.47345	0.0133816	0.18621
ENSG00000171962	160.986	0.770813	0.311614	2.47362	0.0133753	0.18621
ENSG00000006451	18456.8	-0.248446	0.100468	-2.47288	0.013403	0.186347
ENSG00000151490	888.219	0.748709	0.302779	2.47279	0.0134064	0.186347
ENSG00000270986	53.0009	-0.948803	0.383732	-2.47256	0.0134147	0.18636
ENSG00000163125	2248.34	0.428156	0.173231	2.47159	0.0134512	0.186762
ENSG00000243710	194.126	0.660172	0.26713	2.47135	0.0134602	0.186784
ENSG00000203739	1071.21	0.347241	0.14056	2.47042	0.0134956	0.186859
ENSG00000186462	1925.48	0.321222	0.129997	2.47099	0.0134739	0.186859
ENSG00000198417	420.685	-0.422661	0.171078	-2.47057	0.0134897	0.186859
ENSG00000136485	4459.99	0.172768	0.0699242	2.4708	0.0134813	0.186859
ENSG00000171126	98.8173	1.16585	0.472093	2.46954	0.0135286	0.18705
ENSG00000105889	126.146	-0.812901	0.329182	-2.46946	0.0135318	0.18705
ENSG00000259251	28.4001	3.2568	1.31865	2.4698	0.0135188	0.18705
ENSG00000261326	456.22	1.08852	0.440976	2.46843	0.0135709	0.187487
ENSG00000162441	3024.35	-0.242806	0.0983979	-2.46759	0.0136026	0.187821
ENSG00000175471	1536.62	0.48198	0.195369	2.46702	0.0136243	0.188016
ENSG00000137714	641.343	0.476713	0.19326	2.46669	0.0136369	0.188087
ENSG00000283341	24.5985	-2.21685	0.899062	-2.46574	0.0136731	0.188275
ENSG00000255553	74.8749	-2.24471	0.91036	-2.46574	0.0136731	0.188275
ENSG00000251247	699.235	0.612407	0.248341	2.46599	0.0136633	0.188275
ENSG00000272047	5262.54	-0.234368	0.0950679	-2.46527	0.0136909	0.188377
ENSG00000164983	358.366	0.864964	0.350877	2.46515	0.0136956	0.188377
ENSG00000110693	322.687	1.20751	0.489964	2.46449	0.0137208	0.18862
ENSG00000237574	4.36441	-5.5941	2.27019	-2.46416	0.0137336	0.188691
ENSG00000291214	381.446	-0.406447	0.164968	-2.46379	0.0137475	0.188779
ENSG00000204619	4131.32	0.20034	0.0813277	2.46337	0.0137637	0.188898
ENSG00000149295	176.077	0.642025	0.260679	2.4629	0.013782	0.189045
ENSG00000288575	6.48436	-6.16955	2.5057	-2.46221	0.0138084	0.189304
ENSG00000084463	12034.8	0.218718	0.0888466	2.46174	0.0138264	0.189446
ENSG00000106344	3481.55	-0.260051	0.105657	-2.46127	0.0138447	0.189593
ENSG00000198843	31295.5	-0.154617	0.06284	-2.46048	0.0138752	0.189612
ENSG00000079102	3457.09	0.307561	0.124993	2.46063	0.0138692	0.189612
ENSG00000123240	6486.97	-0.252009	0.102413	-2.46071	0.0138663	0.189612
ENSG00000276231	6.29753	-6.12778	2.49052	-2.46045	0.0138765	0.189612
ENSG00000016082	3788.79	0.193811	0.0787822	2.46008	0.0138907	0.189702
ENSG00000234745	2150.5	-0.41314	0.168158	-2.45685	0.014016	0.19131
ENSG00000155657	913.634	0.326635	0.133063	2.45474	0.0140988	0.192335
ENSG00000164105	76.401	0.894927	0.364625	2.45437	0.014113	0.192424
ENSG00000167550	601.438	-0.374245	0.152502	-2.45404	0.0141262	0.192499
ENSG00000101353	78.5596	1.03598	0.422307	2.45313	0.0141618	0.192879
ENSG00000010017	2419.84	0.443332	0.180806	2.45198	0.0142072	0.193391
ENSG00000168779	73.9465	0.910424	0.371581	2.45014	0.0142801	0.194278
ENSG00000270441	23.6537	2.97052	1.21313	2.44864	0.0143398	0.194983
ENSG00000237330	55.0896	-1.98293	0.809934	-2.44827	0.0143546	0.195079
ENSG00000111912	1772.78	-0.279206	0.114064	-2.4478	0.0143732	0.195226
ENSG00000158560	2095.85	0.385299	0.15743	2.44744	0.0143875	0.195313
ENSG00000162753	22.0081	1.98477	0.811217	2.44666	0.0144188	0.195367
ENSG00000240520	10.3037	4.10019	1.67615	2.4462	0.0144372	0.195367
ENSG00000049323	2488.58	0.421549	0.172283	2.44684	0.0144114	0.195367
ENSG00000104327	630.479	0.526208	0.215114	2.44619	0.0144376	0.195367
ENSG00000136891	16280.5	0.179627	0.0734635	2.44512	0.0144806	0.195367
ENSG00000148411	449.573	-0.378241	0.154707	-2.44489	0.0144897	0.195367
ENSG00000156587	13615.5	0.196145	0.0802257	2.44492	0.0144886	0.195367
ENSG00000264230	72.7815	-0.919537	0.375847	-2.44657	0.0144223	0.195367
ENSG00000139629	93.4452	-1.63616	0.669217	-2.44489	0.0144898	0.195367
ENSG00000235660	44.8495	2.38269	0.974277	2.4456	0.0144611	0.195367
ENSG00000156968	120.722	-0.957836	0.391784	-2.44481	0.014493	0.195367
ENSG00000265179	73.8045	1.52675	0.624308	2.4455	0.0144651	0.195367
ENSG00000087076	996.599	-0.358432	0.146582	-2.44527	0.0144744	0.195367
ENSG00000089006	7495.89	-0.237569	0.0971817	-2.44459	0.0145017	0.195379
ENSG00000202523	5.06253	4.33848	1.77668	2.4419	0.0146103	0.196735
ENSG00000047188	1147.47	0.583543	0.23905	2.44109	0.0146429	0.197068
ENSG00000204103	605.729	0.589139	0.241416	2.44035	0.0146732	0.197369
ENSG00000136940	3859.52	0.304745	0.124943	2.43907	0.0147253	0.197858
ENSG00000226608	502.41	-0.450393	0.184658	-2.43906	0.0147254	0.197858
ENSG00000175197	3868.82	-0.381156	0.156455	-2.43621	0.0148422	0.19932
ENSG00000188610	167.145	-0.825046	0.338695	-2.43595	0.0148526	0.199353
ENSG00000234287	110.124	-0.444425	0.182523	-2.43489	0.0148962	0.199724
ENSG00000288800	7.82311	5.44141	2.23462	2.43504	0.0148899	0.199724
ENSG00000130312	6259.25	-0.26551	0.109056	-2.43463	0.0149071	0.199763
ENSG00000215481	22.0889	-1.37342	0.564164	-2.43443	0.0149153	0.199765
ENSG00000131055	81.5484	-1.04461	0.4292	-2.43386	0.0149388	0.199973
ENSG00000110801	998.659	0.323919	0.133173	2.43231	0.0150027	0.200721
ENSG00000105325	132.209	-1.30433	0.536457	-2.43137	0.0150418	0.201137
ENSG00000115306	10374.8	-0.211038	0.0868319	-2.43042	0.0150815	0.201344
ENSG00000118503	430.296	-0.641421	0.263889	-2.43065	0.0150719	0.201344
ENSG00000148120	1242.37	0.290871	0.119674	2.43052	0.0150773	0.201344
ENSG00000148935	380.084	0.727162	0.299304	2.42951	0.0151193	0.201741
ENSG00000228872	19.1925	-2.70114	1.11212	-2.42881	0.0151486	0.202024
ENSG00000281912	6.445	6.15213	2.5341	2.42774	0.0151932	0.202403
ENSG00000289456	213.905	0.687006	0.28298	2.42775	0.0151927	0.202403
ENSG00000166377	1441.55	0.297013	0.122409	2.4264	0.0152493	0.203043
ENSG00000214900	38.0718	-1.72297	0.710369	-2.42545	0.0152893	0.203467
ENSG00000089057	1347.98	-0.366543	0.151143	-2.42514	0.0153025	0.203534
ENSG00000287405	6.81728	-6.24175	2.57411	-2.42482	0.0153161	0.203607
ENSG00000174521	117.288	0.93625	0.386199	2.42427	0.0153393	0.203806
ENSG00000240342	269.379	-0.478643	0.197496	-2.42355	0.0153695	0.20399
ENSG00000186417	51.542	-2.2302	0.920197	-2.42361	0.015367	0.20399
ENSG00000150477	767.378	0.361685	0.149253	2.4233	0.0153801	0.204023
ENSG00000185278	852.221	-0.600297	0.247819	-2.42232	0.0154218	0.204143
ENSG00000214711	13.6342	-3.77812	1.55948	-2.42268	0.0154064	0.204143
ENSG00000235837	10.434	-1.79391	0.740531	-2.42246	0.0154157	0.204143
ENSG00000141424	12855.5	0.16519	0.0681837	2.42273	0.0154045	0.204143
ENSG00000138823	36.3778	3.13292	1.29351	2.42203	0.0154341	0.204198
ENSG00000080166	7.82308	-5.44188	2.24893	-2.41976	0.0155307	0.205282
ENSG00000165804	40.1504	-0.965741	0.399113	-2.41972	0.0155325	0.205282
ENSG00000115414	24530.5	-0.303704	0.125536	-2.41925	0.0155525	0.205329
ENSG00000235330	14.9495	2.05626	0.849895	2.41943	0.015545	0.205329
ENSG00000007350	11.6867	7.01341	2.90084	2.41772	0.0156182	0.206087
ENSG00000152242	4658.23	-0.221317	0.0915665	-2.417	0.0156488	0.206383
ENSG00000271736	41.339	-3.93922	1.63007	-2.4166	0.0156663	0.206396
ENSG00000135090	1812.39	0.333594	0.138042	2.41662	0.0156655	0.206396
ENSG00000119888	48491.9	-0.259983	0.107628	-2.41558	0.0157102	0.206861
ENSG00000114405	6215.67	0.35828	0.148332	2.41539	0.0157182	0.206861
ENSG00000019485	38.3608	-1.86433	0.772501	-2.41337	0.0158057	0.207808
ENSG00000139055	18738.2	0.497552	0.206167	2.41335	0.0158068	0.207808
ENSG00000243155	8.20303	-3.95788	1.6408	-2.41216	0.0158583	0.208375
ENSG00000166974	16874.1	0.217797	0.0903012	2.4119	0.0158697	0.208416
ENSG00000213058	3786.25	-0.19286	0.0799916	-2.41101	0.0159085	0.208584
ENSG00000112290	6061.67	0.525712	0.218024	2.41125	0.0158978	0.208584
ENSG00000214018	6.48865	3.0639	1.27072	2.41115	0.0159022	0.208584
ENSG00000136044	1536.27	0.311344	0.129143	2.41084	0.0159159	0.208584
ENSG00000169083	230.492	0.727229	0.301708	2.41037	0.0159362	0.20874
ENSG00000229267	217.057	0.955426	0.396465	2.40987	0.0159584	0.208836
ENSG00000273372	6.00585	6.05272	2.5117	2.40981	0.0159607	0.208836
ENSG00000100926	451.004	0.364398	0.151237	2.40944	0.0159769	0.208836
ENSG00000167397	947.472	-0.227295	0.0943292	-2.40959	0.0159705	0.208836
ENSG00000226889	74.4618	0.701308	0.291121	2.40899	0.0159965	0.208984
ENSG00000177917	8383.31	-0.198754	0.0825138	-2.40874	0.0160078	0.209021
ENSG00000113569	9196.89	0.233954	0.097157	2.408	0.0160403	0.209293
ENSG00000165733	10818.1	0.203997	0.0847204	2.40788	0.0160454	0.209293
ENSG00000183474	1258.56	-0.292808	0.121649	-2.407	0.0160842	0.20969
ENSG00000163053	1567.28	0.497613	0.206848	2.4057	0.0161415	0.210275
ENSG00000115339	733.175	-0.492258	0.20463	-2.4056	0.0161459	0.210275
ENSG00000104043	373.028	-0.766818	0.318799	-2.40533	0.0161578	0.210321
ENSG00000126217	509.702	0.44774	0.186181	2.40487	0.0161782	0.210368
ENSG00000223572	227.965	-0.381123	0.158469	-2.40503	0.0161714	0.210368
ENSG00000104517	3745.12	-0.384273	0.15981	-2.40457	0.0161915	0.210431
ENSG00000227063	345.901	-0.309523	0.12878	-2.40351	0.0162385	0.210931
ENSG00000130052	45.3637	-1.50442	0.626006	-2.40321	0.0162518	0.210994
ENSG00000236364	19.4491	1.92301	0.800455	2.4024	0.0162881	0.211282
ENSG00000183793	15.1914	-1.34608	0.560322	-2.40233	0.0162908	0.211282
ENSG00000185634	1120.08	0.396419	0.165028	2.40213	0.0163001	0.211292
ENSG00000173376	740.998	0.64376	0.268044	2.4017	0.0163193	0.211373
ENSG00000152475	8.72276	2.9955	1.24729	2.40161	0.0163232	0.211373
ENSG00000153827	7263.83	0.250541	0.104402	2.39978	0.016405	0.211933
ENSG00000169087	2488.39	-0.283845	0.118283	-2.39972	0.0164075	0.211933
ENSG00000170807	7.3574	-5.35743	2.23255	-2.39969	0.0164089	0.211933
ENSG00000166801	634.115	-0.523212	0.218024	-2.39979	0.0164044	0.211933
ENSG00000267333	4.88141	-4.73856	1.97457	-2.39979	0.0164045	0.211933
ENSG00000171865	2025.5	0.477364	0.199061	2.39808	0.0164813	0.212538
ENSG00000136267	222.298	0.575337	0.239934	2.39789	0.0164897	0.212538
ENSG00000164744	42.7904	-2.11615	0.882451	-2.39803	0.0164833	0.212538
ENSG00000263272	294.752	0.549364	0.229089	2.39804	0.0164831	0.212538
ENSG00000198162	3792.6	-0.341284	0.142372	-2.39714	0.0165238	0.212867
ENSG00000186480	5071.33	-0.75999	0.31716	-2.39624	0.0165644	0.21328
ENSG00000185414	3643.66	0.33346	0.13918	2.39589	0.01658	0.213372
ENSG00000135316	4107.57	0.202183	0.0843953	2.39567	0.0165901	0.213392
ENSG00000229751	9.32177	2.53677	1.05933	2.3947	0.0166342	0.213848
ENSG00000125741	578.937	-0.66381	0.277415	-2.39284	0.0167186	0.214824
ENSG00000101144	3055.17	-0.301536	0.126151	-2.39027	0.016836	0.216221
ENSG00000106245	9110.54	0.253821	0.106248	2.38895	0.0168964	0.216829
ENSG00000196155	13.5539	-2.98891	1.25119	-2.38886	0.0169007	0.216829
ENSG00000168811	66.7773	-1.5929	0.666984	-2.38821	0.0169306	0.216961
ENSG00000165929	1529.67	-0.342228	0.143286	-2.38843	0.0169205	0.216961
ENSG00000170369	27.5854	-2.09598	0.877689	-2.38807	0.0169371	0.216961
ENSG00000163002	3060.18	-0.306413	0.128335	-2.3876	0.016959	0.217131
ENSG00000179335	4807.22	-0.447559	0.187513	-2.38681	0.0169953	0.217443
ENSG00000225975	142.691	0.716555	0.30023	2.38669	0.0170008	0.217443
ENSG00000243359	12.7181	2.2759	0.953949	2.38577	0.0170434	0.217458
ENSG00000131023	1298.36	-0.425505	0.178376	-2.38544	0.0170588	0.217458
ENSG00000112343	2130.9	0.319293	0.133799	2.38637	0.0170158	0.217458
ENSG00000117868	2040.98	0.301273	0.126292	2.38552	0.0170549	0.217458
ENSG00000108176	1837.87	0.475099	0.199101	2.38621	0.0170228	0.217458
ENSG00000095539	82.7776	0.869945	0.364677	2.38552	0.0170549	0.217458
ENSG00000261033	5.92059	-6.03871	2.53158	-2.38535	0.0170629	0.217458
ENSG00000160219	30.9861	2.4276	1.01782	2.3851	0.0170744	0.217494
ENSG00000268573	54.147	1.56266	0.655235	2.38489	0.0170844	0.217511
ENSG00000221818	3153.66	0.536753	0.225105	2.38446	0.0171043	0.217542
ENSG00000287004	15.1724	3.05816	1.28244	2.38463	0.0170961	0.217542
ENSG00000171241	4303.99	-0.240695	0.100956	-2.38416	0.0171181	0.217597
ENSG00000125746	418.988	-0.670267	0.281153	-2.38399	0.017126	0.217597
ENSG00000138101	550.747	0.570019	0.239133	2.38369	0.0171398	0.217636
ENSG00000078043	1997.76	0.56683	0.237809	2.38355	0.0171465	0.217636
ENSG00000099960	207.186	-1.36139	0.571311	-2.38292	0.0171759	0.217898
ENSG00000146021	2097.07	0.415949	0.174573	2.38266	0.0171879	0.21794
ENSG00000197043	6264.86	-0.620532	0.260523	-2.38187	0.017225	0.217968
ENSG00000135549	3761.01	-0.33049	0.138751	-2.38189	0.017224	0.217968
ENSG00000078596	8894.29	0.463376	0.194539	2.38192	0.0172225	0.217968
ENSG00000187676	929.617	0.584135	0.245218	2.3821	0.0172142	0.217968
ENSG00000164951	5384.56	0.301007	0.126389	2.3816	0.0172378	0.218019
ENSG00000172331	5462.06	-0.217409	0.0912969	-2.38134	0.0172499	0.218062
ENSG00000107282	347.705	0.533764	0.224238	2.38034	0.0172965	0.218541
ENSG00000249584	38.5961	1.50624	0.632872	2.38001	0.0173123	0.2186
ENSG00000127022	93401.3	0.17558	0.0737771	2.37987	0.0173187	0.2186
ENSG00000104447	398.998	0.721457	0.303203	2.37945	0.0173383	0.218737
ENSG00000186166	1521.21	-0.306544	0.128863	-2.37884	0.0173674	0.218994
ENSG00000145147	1306.63	0.585593	0.246217	2.37836	0.0173897	0.219165
ENSG00000171533	1205.07	0.507437	0.213408	2.37778	0.0174172	0.219312
ENSG00000105202	6707.87	-0.339322	0.142708	-2.37774	0.0174189	0.219312
ENSG00000181619	129.667	1.03988	0.437602	2.37631	0.0174866	0.220053
ENSG00000140391	25727.7	0.268062	0.112865	2.37506	0.0175463	0.220692
ENSG00000119929	2690.97	-0.297333	0.125203	-2.3748	0.0175583	0.220733
ENSG00000287318	11.4807	6.98603	2.942	2.37459	0.0175687	0.220752
ENSG00000158406	122.002	0.76318	0.321425	2.37436	0.0175793	0.220774
ENSG00000197111	965.566	-0.33534	0.141253	-2.37404	0.0175947	0.220857
ENSG00000280707	32.9585	-2.0091	0.846596	-2.37315	0.0176372	0.22128
ENSG00000107960	202.767	0.614386	0.258942	2.37268	0.0176596	0.221339
ENSG00000105131	873.763	-0.630623	0.265782	-2.37271	0.0176582	0.221339
ENSG00000133706	25424.1	-0.272053	0.114717	-2.37151	0.0177154	0.221927
ENSG00000162669	284.453	0.600391	0.253233	2.3709	0.017745	0.222035
ENSG00000285900	13.4231	3.96216	1.67109	2.371	0.01774	0.222035
ENSG00000075415	34066.2	-0.147219	0.0620972	-2.37078	0.0177508	0.222035
[truncated: 36,982 more rows]

## Sheet: Table S6
Table S6 | RNAseq DEG analysis of D21 BRD1 vs WT iGLUTs
	baseMean	log2FoldChange	lfcSE	stat	pvalue	padj
ENSG00000106853	2424.64	1.41804	0.103296	13.7279	6.91054e-43	9.65334e-39
ENSG00000198105	685.767	-12.0187	0.873092	-13.7657	4.09825e-43	9.65334e-39
ENSG00000121691	367.392	-12.0797	0.909486	-13.2819	2.94736e-40	2.74478e-36
ENSG00000269994	1614.97	-1.93112	0.149499	-12.9173	3.59771e-38	2.51282e-34
ENSG00000255433	4982.08	-1.9265	0.153629	-12.54	4.51189e-36	2.52106e-32
ENSG00000289361	158.931	-10.872	0.874054	-12.4386	1.61319e-35	7.51153e-32
ENSG00000198934	127.972	-10.5596	1.02405	-10.3116	6.24287e-25	2.18017e-21
ENSG00000147571	1431.88	-1.94806	0.188904	-10.3124	6.19377e-25	2.18017e-21
ENSG00000272602	61.1562	-9.49232	0.938396	-10.1155	4.71734e-24	1.46437e-20
ENSG00000196604	188.63	2.50471	0.258178	9.7015	2.97109e-22	8.30062e-19
ENSG00000126947	353.494	-3.04504	0.314913	-9.66945	4.06556e-22	1.03258e-18
ENSG00000132357	16.7971	-22.6831	2.78904	-8.13295	4.18982e-16	9.7546e-13
ENSG00000049249	1180.12	-1.43424	0.180488	-7.94645	1.91934e-15	4.1248e-12
ENSG00000215808	1778.51	-0.963625	0.129531	-7.43933	1.01201e-13	2.01953e-10
ENSG00000285569	32.6178	-4.63266	0.687168	-6.74167	1.56579e-11	2.91633e-08
ENSG00000145708	6885.45	-0.851874	0.126993	-6.70803	1.97273e-11	3.44464e-08
ENSG00000187608	640.957	-1.21403	0.185672	-6.53853	6.21264e-11	1.02099e-07
ENSG00000115919	19.2648	7.64733	1.22994	6.21763	5.04712e-10	7.63676e-07
ENSG00000154040	2230.07	0.928938	0.149512	6.21314	5.19358e-10	7.63676e-07
ENSG00000280870	1266.79	1.42591	0.237056	6.01509	1.7979e-09	2.51148e-06
ENSG00000233994	196.835	1.22858	0.207066	5.93328	2.96938e-09	3.9504e-06
ENSG00000289731	252.469	-1.14151	0.195547	-5.83751	5.29859e-09	6.72873e-06
ENSG00000225548	197.827	-1.17726	0.202984	-5.79977	6.64052e-09	7.73011e-06
ENSG00000182718	123916	-0.471915	0.0812848	-5.8057	6.40977e-09	7.73011e-06
ENSG00000170955	43.9511	2.70911	0.478135	5.666	1.46167e-08	1.63345e-05
ENSG00000155511	820.565	1.02868	0.182643	5.63223	1.77898e-08	1.91159e-05
ENSG00000163499	667.448	-1.09983	0.197075	-5.58074	2.39501e-08	2.47821e-05
ENSG00000167105	14.9774	7.28394	1.31114	5.55543	2.76927e-08	2.76314e-05
ENSG00000163191	4549.32	-1.15852	0.209034	-5.54225	2.98615e-08	2.87679e-05
ENSG00000131264	19.7372	7.68471	1.42639	5.38752	7.14362e-08	6.65261e-05
ENSG00000267313	593.67	-0.846659	0.157728	-5.36785	7.96803e-08	7.18099e-05
ENSG00000160712	19.5228	-4.95679	0.932031	-5.31826	1.04763e-07	9.14642e-05
ENSG00000227012	512.01	-1.42986	0.2697	-5.30167	1.14747e-07	9.71454e-05
ENSG00000261079	6.30539	6.04122	1.14978	5.25424	1.48636e-07	0.000122135
ENSG00000166527	21.7476	7.82392	1.49688	5.22681	1.72458e-07	0.000137661
ENSG00000196967	4247.64	-0.953287	0.183933	-5.18278	2.18597e-07	0.000169643
ENSG00000117318	27401.9	-0.600499	0.116938	-5.13519	2.81853e-07	0.000212822
ENSG00000183662	323.957	-1.33691	0.261008	-5.12209	3.02164e-07	0.000222154
ENSG00000159167	11703	-0.399084	0.078403	-5.09017	3.57744e-07	0.000256273
ENSG00000247877	129.316	-1.52724	0.301944	-5.05803	4.236e-07	0.000295863
ENSG00000100097	2392.66	-0.972324	0.196164	-4.95668	7.17063e-07	0.000488618
ENSG00000214988	6.75865	6.13802	1.2403	4.94883	7.46601e-07	0.000496632
ENSG00000010278	645.339	-0.892654	0.181112	-4.92873	8.27665e-07	0.000537751
ENSG00000231991	620.193	-0.556341	0.113158	-4.91648	8.81159e-07	0.000559496
ENSG00000269993	896.615	0.762134	0.156912	4.85708	1.19131e-06	0.000739615
ENSG00000271945	248.254	-0.893133	0.184067	-4.85221	1.22091e-06	0.000741515
ENSG00000099260	21.3808	6.82224	1.41131	4.83399	1.33827e-06	0.0007955
ENSG00000129521	164.864	1.42865	0.298219	4.79061	1.66271e-06	0.000967769
ENSG00000156140	29.6028	8.26933	1.75282	4.71773	2.38494e-06	0.00135981
ENSG00000204065	208.764	-3.68789	0.793473	-4.64779	3.35517e-06	0.00187474
ENSG00000248810	25.8228	5.32189	1.14687	4.64038	3.47771e-06	0.0019051
ENSG00000251688	4.64999	5.59638	1.21558	4.60386	4.14723e-06	0.00222818
ENSG00000230590	8884.84	1.13259	0.247347	4.57895	4.6731e-06	0.00246334
ENSG00000235389	5.61898	5.87082	1.28368	4.57343	4.79802e-06	0.00248235
ENSG00000133878	211.606	-2.73016	0.608997	-4.48304	7.3588e-06	0.00373801
ENSG00000257125	232.792	-0.880749	0.196861	-4.47395	7.67862e-06	0.00383081
ENSG00000213719	40984.3	-0.248534	0.0556377	-4.46701	7.9322e-06	0.00386643
ENSG00000166710	11473	-0.747272	0.167382	-4.46447	8.02682e-06	0.00386643
ENSG00000233593	3592.56	-0.491198	0.110277	-4.4542	8.42054e-06	0.00398734
ENSG00000087253	761.465	-1.27592	0.288042	-4.42964	9.43893e-06	0.00439508
ENSG00000214415	568.888	-1.01287	0.22944	-4.41451	1.01239e-05	0.00463673
ENSG00000269514	74.5426	-1.71191	0.38841	-4.40749	1.04575e-05	0.00471227
ENSG00000250579	197.956	1.55769	0.355038	4.38738	1.14725e-05	0.00508759
ENSG00000287935	11.0077	6.84094	1.56836	4.36185	1.28965e-05	0.00562974
ENSG00000289163	12.2028	6.98924	1.60479	4.35523	1.32925e-05	0.00571331
ENSG00000290555	62.28	-3.31456	0.762346	-4.34784	1.37484e-05	0.00581974
ENSG00000144366	1045.4	-0.973484	0.225626	-4.3146	1.59895e-05	0.00665942
ENSG00000255236	14.1788	7.20793	1.67176	4.31159	1.62088e-05	0.00665942
ENSG00000163666	858.954	-0.86247	0.200565	-4.30021	1.70637e-05	0.00690907
ENSG00000120306	7507.15	-0.315888	0.0736041	-4.29172	1.77297e-05	0.00707618
ENSG00000227115	14029.9	-1.12871	0.264359	-4.26962	1.95805e-05	0.00770478
ENSG00000175161	3749.08	0.66252	0.156104	4.24409	2.19478e-05	0.0083997
ENSG00000157502	866.355	1.25358	0.295328	4.24472	2.1887e-05	0.0083997
ENSG00000148908	6335.12	-0.526001	0.124369	-4.22935	2.34369e-05	0.00884839
ENSG00000183036	4025.2	-0.504366	0.119359	-4.2256	2.38303e-05	0.00887695
ENSG00000236184	9.44307	-6.79562	1.61291	-4.21326	2.51711e-05	0.00925303
ENSG00000155307	829.85	-1.00595	0.238956	-4.20976	2.55644e-05	0.00927556
ENSG00000092010	3554.24	-0.311417	0.0740613	-4.20486	2.61241e-05	0.00935711
ENSG00000105048	1494.43	-0.61269	0.145822	-4.20164	2.64987e-05	0.00937114
ENSG00000165164	35.2748	6.42856	1.53878	4.17771	2.94454e-05	0.0102831
ENSG00000198087	557.385	-1.14803	0.275133	-4.17262	3.01111e-05	0.0103857
ENSG00000181541	265.727	0.905103	0.217201	4.16712	3.08473e-05	0.0105099
ENSG00000240038	293.139	0.73408	0.176573	4.15738	3.21919e-05	0.0107069
ENSG00000108515	3457.05	-0.788504	0.189654	-4.15758	3.21638e-05	0.0107069
ENSG00000123572	18.0965	6.57856	1.59331	4.12887	3.6455e-05	0.0119821
ENSG00000231240	3.81535	5.3128	1.28939	4.1204	3.78208e-05	0.0122865
ENSG00000123600	1921.86	-0.540426	0.131363	-4.11398	3.8889e-05	0.0124883
ENSG00000133710	174.52	-3.28215	0.803476	-4.08494	4.40874e-05	0.0139968
ENSG00000143314	4996.6	-0.491481	0.120659	-4.07331	4.63495e-05	0.0145496
ENSG00000262772	7.09971	5.2197	1.28293	4.06859	4.72979e-05	0.0146823
ENSG00000164093	856.323	1.08031	0.26615	4.05902	4.92788e-05	0.0151291
ENSG00000125675	3254.79	0.46983	0.116276	4.04066	5.33009e-05	0.016034
ENSG00000166840	248.832	-1.30871	0.324194	-4.0368	5.41852e-05	0.016034
ENSG00000180423	1914.04	-0.560714	0.138951	-4.03535	5.45216e-05	0.016034
ENSG00000108010	12874.5	-0.264169	0.0654113	-4.03858	5.37747e-05	0.016034
ENSG00000185532	6504.24	-0.557979	0.138949	-4.01572	5.92654e-05	0.0172475
ENSG00000123136	7301.3	-0.163362	0.0407543	-4.00845	6.1118e-05	0.0176032
ENSG00000100095	2551.39	0.465335	0.116165	4.00582	6.18024e-05	0.0176187
ENSG00000279602	332.261	0.705605	0.17646	3.99868	6.3698e-05	0.0179757
ENSG00000134115	830.536	0.769125	0.192743	3.99042	6.59557e-05	0.0180654
ENSG00000131503	107.531	1.02761	0.257472	3.99113	6.5758e-05	0.0180654
ENSG00000135346	8442.32	-0.75138	0.188163	-3.99325	6.51742e-05	0.0180654
ENSG00000184672	2329.21	0.741332	0.185934	3.98707	6.68938e-05	0.018144
ENSG00000090013	2531.07	-0.375506	0.094235	-3.98478	6.75417e-05	0.018144
ENSG00000144642	13988.9	-0.534367	0.13451	-3.97269	7.10666e-05	0.0189091
ENSG00000161055	8.08703	6.39645	1.61218	3.96758	7.26064e-05	0.0189577
ENSG00000198056	454.256	-0.55407	0.139637	-3.96792	7.25031e-05	0.0189577
ENSG00000090402	12.3862	7.01153	1.76943	3.96259	7.41397e-05	0.0191788
ENSG00000170390	458.155	0.720742	0.182872	3.94123	8.10632e-05	0.0207775
ENSG00000289041	9.56054	6.63674	1.69224	3.92186	8.78666e-05	0.0217346
ENSG00000171604	2567.11	-0.367942	0.0937591	-3.92433	8.69712e-05	0.0217346
ENSG00000196090	872.939	0.962324	0.245381	3.92175	8.79095e-05	0.0217346
ENSG00000167755	119.689	-1.76188	0.448843	-3.92538	8.65936e-05	0.0217346
ENSG00000278200	41.0753	1.72474	0.440729	3.91338	9.10148e-05	0.022305
ENSG00000075407	3014.67	-0.910564	0.233097	-3.90638	9.36899e-05	0.0227609
ENSG00000262038	6.55147	6.09107	1.5607	3.90279	9.50906e-05	0.0229021
ENSG00000108984	6926.51	0.523692	0.135346	3.86929	0.000109155	0.0260646
ENSG00000100867	1401.25	-0.501782	0.129753	-3.8672	0.000110093	0.0260659
ENSG00000267279	159.911	-1.03701	0.268309	-3.86499	0.000111096	0.0260823
ENSG00000289362	321.044	-0.940854	0.243846	-3.85839	0.000114137	0.026573
ENSG00000061918	5845.17	0.497486	0.129527	3.84079	0.000122638	0.0282497
ENSG00000133110	865.181	-0.864621	0.2252	-3.83935	0.000123361	0.0282497
ENSG00000203740	51.6997	-3.89125	1.01512	-3.83331	0.000126432	0.0282579
ENSG00000060138	604.549	-0.829026	0.216189	-3.83473	0.000125704	0.0282579
ENSG00000152207	26.5692	-6.38292	1.66429	-3.83522	0.00012545	0.0282579
ENSG00000281832	6.62856	6.10883	1.59711	3.82492	0.000130817	0.0290061
ENSG00000286882	3.70671	5.27419	1.38041	3.82074	0.000133054	0.0292697
ENSG00000253711	7.70619	6.3297	1.66256	3.80721	0.000140541	0.0306753
ENSG00000135525	1230.92	-0.745876	0.196454	-3.7967	0.000146637	0.0312737
ENSG00000265750	108.046	0.901711	0.237499	3.79669	0.000146641	0.0312737
ENSG00000267316	23.2185	-3.26097	0.858355	-3.79909	0.000145226	0.0312737
ENSG00000102290	7173.36	0.620283	0.163457	3.79479	0.00014777	0.0312757
ENSG00000032742	2966.35	-0.484572	0.127886	-3.7891	0.000151192	0.0315223
ENSG00000169856	5703.73	0.43981	0.116029	3.79052	0.00015033	0.0315223
ENSG00000260701	63.5116	1.93551	0.512222	3.77865	0.000157681	0.0326318
ENSG00000231389	388.869	-1.02906	0.272488	-3.77654	0.000159023	0.0326674
ENSG00000288736	11.0254	-7.0229	1.86679	-3.76203	0.000168543	0.0343704
ENSG00000204110	819.679	-0.632176	0.168666	-3.7481	0.000178181	0.0360725
ENSG00000223460	8.23859	6.42519	1.71567	3.745	0.000180396	0.0362584
ENSG00000164099	1234.41	-0.63803	0.170468	-3.7428	0.000181978	0.036315
ENSG00000237053	12.4816	7.0224	1.87757	3.74016	0.000183906	0.0364172
ENSG00000165973	844.991	1.07661	0.287975	3.73853	0.000185097	0.0364172
ENSG00000240704	75.4636	-1.10308	0.295293	-3.73556	0.000187296	0.0365921
ENSG00000100393	1267.64	0.691908	0.185851	3.72292	0.00019693	0.0382071
ENSG00000244128	515.838	1.18604	0.319121	3.71657	0.000201946	0.0389102
ENSG00000273033	260.254	1.51801	0.409826	3.70405	0.000212186	0.0399717
ENSG00000054598	53.9798	2.8185	0.761314	3.70215	0.00021378	0.0399717
ENSG00000253474	484.705	-0.790388	0.213414	-3.70355	0.000212605	0.0399717
ENSG00000213659	95.5504	-0.987921	0.266537	-3.70651	0.000210135	0.0399717
ENSG00000123066	1807.86	0.522687	0.141222	3.70117	0.000214609	0.0399717
ENSG00000038427	3185.67	0.620509	0.167793	3.69806	0.000217255	0.0401964
ENSG00000040731	7324.53	0.414884	0.112258	3.69581	0.000219191	0.0402878
ENSG00000144306	4196.65	-0.381824	0.103444	-3.69112	0.000223271	0.0407695
ENSG00000230269	1122.54	-0.5339	0.145043	-3.68097	0.00023235	0.0421519
ENSG00000274642	365.702	-0.641142	0.174649	-3.67103	0.000241573	0.0435424
ENSG00000076706	764.389	-0.563946	0.153796	-3.66685	0.000245561	0.0439775
ENSG00000151632	4209.93	0.3495	0.0954825	3.66036	0.00025186	0.0448183
ENSG00000291156	1390.82	-0.461174	0.126235	-3.65331	0.000258884	0.0453982
ENSG00000138759	506.024	1.03962	0.284654	3.65221	0.000259994	0.0453982
ENSG00000224944	40.2062	1.65809	0.453992	3.65224	0.000259958	0.0453982
ENSG00000137177	436.492	0.814705	0.223678	3.64231	0.000270207	0.0468195
ENSG00000103449	445.065	0.893396	0.245365	3.64109	0.000271485	0.0468195
ENSG00000162631	2215.42	-0.608114	0.167193	-3.63721	0.000275611	0.0472393
ENSG00000127720	206.976	0.855648	0.235829	3.62825	0.000285348	0.0486101
ENSG00000072954	2120.75	-0.327511	0.09035	-3.62491	0.000289059	0.0489439
ENSG00000172059	335.528	1.1875	0.328948	3.61	0.000306201	0.051534
ENSG00000157005	6309.86	-0.59604	0.165746	-3.59611	0.000323015	0.0540383
ENSG00000145423	15.3552	3.14296	0.877173	3.58305	0.000339601	0.0558198
ENSG00000214954	21.4063	2.54748	0.71055	3.58522	0.00033679	0.0558198
ENSG00000267193	10.75	6.8077	1.89999	3.58301	0.000339658	0.0558198
ENSG00000152078	504.497	0.743941	0.208104	3.57485	0.000350428	0.057253
ENSG00000144227	2014.85	-0.661399	0.185211	-3.57107	0.000355531	0.0574152
ENSG00000172159	11922.6	-0.32496	0.0909668	-3.57229	0.000353872	0.0574152
ENSG00000167641	1914.51	-0.497771	0.140139	-3.55199	0.000382332	0.0613884
ENSG00000187715	5.66798	5.88567	1.65777	3.55036	0.000384698	0.0614155
ENSG00000155849	7726.95	0.494913	0.13965	3.54395	0.000394179	0.0620441
ENSG00000237972	7.74562	5.33313	1.50517	3.5432	0.000395298	0.0620441
ENSG00000243193	104.866	1.17564	0.331623	3.54511	0.000392448	0.0620441
ENSG00000197956	83.0767	-1.09014	0.308072	-3.5386	0.000402256	0.0627834
ENSG00000125445	10477.3	-0.318259	0.0902513	-3.52637	0.000421297	0.06539
ENSG00000153363	488.591	-0.5621	0.160117	-3.51056	0.000447167	0.0690218
ENSG00000137547	9170.85	-0.229894	0.0656321	-3.50277	0.00046044	0.0706801
ENSG00000279879	83.5556	-1.41349	0.404529	-3.49416	0.000475561	0.0726023
ENSG00000205929	314.091	0.996136	0.285405	3.49026	0.000482553	0.0732693
ENSG00000236841	746.435	-0.821533	0.235509	-3.48833	0.000486048	0.0734012
ENSG00000165168	21.2275	-6.18399	1.77377	-3.48634	0.000489671	0.0735507
ENSG00000249745	5.81348	5.91928	1.70095	3.47998	0.00050145	0.0748134
ENSG00000159556	298.262	-0.799337	0.229766	-3.47892	0.000503433	0.0748134
ENSG00000164509	18.477	-7.76679	2.2361	-3.47336	0.000513988	0.0759778
ENSG00000286741	10.913	6.83023	1.97115	3.4651	0.000530035	0.0779374
ENSG00000198832	2948.73	-0.425238	0.122913	-3.45968	0.000540818	0.0791067
ENSG00000085760	2428.78	-0.408667	0.118379	-3.45219	0.000556049	0.0804917
ENSG00000249476	17.9358	-4.03638	1.16875	-3.45358	0.000553191	0.0804917
ENSG00000188906	29.4826	5.54852	1.60866	3.44916	0.000562341	0.0809829
ENSG00000010270	27210.6	-0.148793	0.0431622	-3.44731	0.000566207	0.0811215
ENSG00000147381	17.7636	-7.70958	2.23972	-3.44221	0.000576992	0.0822449
ENSG00000076382	130.419	1.04752	0.304586	3.43917	0.000583504	0.0822986
ENSG00000186566	2853.59	0.309473	0.0899914	3.43892	0.00058405	0.0822986
ENSG00000104856	7.60817	5.31324	1.54548	3.43792	0.000586206	0.0822986
ENSG00000145431	670.61	1.25787	0.36644	3.43269	0.000597627	0.0834825
ENSG00000185046	2589.33	0.564909	0.164929	3.42517	0.000614405	0.0849765
ENSG00000171574	1727.93	0.652267	0.190392	3.42591	0.000612747	0.0849765
ENSG00000147596	984.085	0.676071	0.197615	3.42116	0.000623546	0.0850173
ENSG00000148600	508.701	0.915688	0.267603	3.42182	0.000622037	0.0850173
ENSG00000260492	334.551	0.912223	0.266651	3.42104	0.00062383	0.0850173
ENSG00000188322	1078.79	0.523856	0.153213	3.41913	0.000628228	0.0852011
ENSG00000260025	291.495	0.745598	0.218295	3.41555	0.000636528	0.08562
ENSG00000231698	14.1585	3.07833	0.901718	3.41385	0.00064051	0.08562
ENSG00000277182	673.673	0.409447	0.119925	3.4142	0.000639701	0.08562
ENSG00000203663	55.7096	2.86176	0.839695	3.4081	0.00065417	0.0866171
ENSG00000186019	640.591	-0.603582	0.177047	-3.40917	0.000651602	0.0866171
ENSG00000088836	33.6877	2.39551	0.703481	3.40523	0.000661085	0.0871198
ENSG00000204446	5.88363	5.93968	1.74663	3.40065	0.000672252	0.0881755
ENSG00000234636	209.791	-0.811589	0.238935	-3.3967	0.000682038	0.089041
ENSG00000232084	180.924	-0.932676	0.275159	-3.38959	0.00069997	0.0897054
ENSG00000249346	7.15215	5.21542	1.53705	3.39315	0.000690938	0.0897054
ENSG00000166863	79.6482	-1.54828	0.456485	-3.39174	0.000694505	0.0897054
ENSG00000136451	3976.92	0.335982	0.0991005	3.39032	0.000698111	0.0897054
ENSG00000233029	24.2355	-2.42435	0.71587	-3.38658	0.00070769	0.0902806
ENSG00000072506	4431.35	-0.290037	0.0857276	-3.38324	0.00071636	0.0909713
ENSG00000115461	486.896	-0.920131	0.27247	-3.377	0.0007328	0.0918305
ENSG00000102158	2055.73	-0.439645	0.130157	-3.37781	0.000730656	0.0918305
ENSG00000259281	6.01994	5.97013	1.76792	3.37693	0.000732987	0.0918305
ENSG00000118557	1492.38	0.598394	0.177379	3.37354	0.000742094	0.0925564
ENSG00000257298	14.0913	-6.39481	1.897	-3.37102	0.000748911	0.0929914
ENSG00000143549	32027.9	-0.17621	0.0523143	-3.3683	0.000756332	0.0934973
ENSG00000212175	4.87287	-4.83871	1.4378	-3.36535	0.000764473	0.0940874
ENSG00000216560	25.265	-3.10253	0.923607	-3.35914	0.000781849	0.0958039
ENSG00000279129	7.32921	6.25243	1.86608	3.35057	0.000806458	0.0983878
ENSG00000228223	1271.93	0.625807	0.18692	3.34799	0.000814	0.0984482
ENSG00000288920	1782.25	0.399899	0.119412	3.34891	0.000811292	0.0984482
ENSG00000270362	323.166	0.756017	0.225988	3.34539	0.000821679	0.0989486
ENSG00000134265	16912.3	-0.252069	0.07539	-3.34353	0.000827186	0.0991842
ENSG00000165169	15183.7	-0.400744	0.120031	-3.33867	0.000841813	0.100507
ENSG00000231776	13.4485	-3.21594	0.964664	-3.33374	0.000856868	0.101869
ENSG00000237737	285.252	0.664543	0.199471	3.33152	0.000863726	0.102249
ENSG00000160013	22.2483	6.88304	2.06708	3.32983	0.000868984	0.102437
ENSG00000116898	8076.19	-0.24438	0.0734854	-3.32556	0.000882424	0.103441
ENSG00000255968	25.7656	-2.2077	0.664247	-3.32361	0.000888608	0.103441
ENSG00000140090	14.2773	6.23242	1.87508	3.32382	0.000887931	0.103441
ENSG00000278896	7.16282	6.21988	1.87431	3.31849	0.000905065	0.10492
ENSG00000112246	3260.54	0.518134	0.156489	3.311	0.000929638	0.106737
ENSG00000156395	2292.15	0.494435	0.149366	3.31023	0.000932197	0.106737
ENSG00000285608	8.72097	3.70576	1.11945	3.31034	0.000931821	0.106737
ENSG00000164326	627.163	-1.12476	0.340557	-3.30272	0.000957533	0.107436
ENSG00000176928	3603.13	-0.97804	0.296074	-3.30336	0.000955323	0.107436
ENSG00000291174	172.359	0.926209	0.280411	3.30304	0.000956435	0.107436
ENSG00000254896	16.0459	-7.56237	2.28719	-3.3064	0.00094504	0.107436
ENSG00000082397	5940.08	-0.53941	0.163322	-3.30274	0.000957452	0.107436
ENSG00000288548	5.83165	5.92188	1.79436	3.30027	0.000965919	0.107943
ENSG00000236811	9.64179	6.65275	2.01757	3.29741	0.000975801	0.108613
ENSG00000106066	959.439	-0.545333	0.165576	-3.29355	0.000989324	0.108818
ENSG00000286282	15.3944	-7.50314	2.27793	-3.29384	0.000988277	0.108818
ENSG00000272259	9.88668	5.70699	1.73208	3.29487	0.000984661	0.108818
ENSG00000169282	4045	-0.323435	0.0984219	-3.28621	0.00101546	0.111255
ENSG00000166707	1826.19	0.598623	0.18232	3.28336	0.00102578	0.111946
ENSG00000271270	321.038	-0.769906	0.234896	-3.27764	0.00104678	0.113794
ENSG00000163565	1805.63	-0.807118	0.246379	-3.27592	0.00105319	0.114047
ENSG00000136158	2096.67	-0.540788	0.165138	-3.27476	0.00105752	0.114073
ENSG00000285943	10.0416	3.93312	1.20192	3.27238	0.00106648	0.114597
ENSG00000106341	17254.3	-0.422652	0.129224	-3.27069	0.00107286	0.114841
ENSG00000132109	2061.66	-0.425582	0.130184	-3.26907	0.00107902	0.114876
ENSG00000286069	584.044	0.590742	0.180741	3.26844	0.0010814	0.114876
ENSG00000286879	8.28524	6.43369	1.97091	3.26432	0.00109726	0.115426
ENSG00000216921	136.128	-1.1203	0.34323	-3.26399	0.00109857	0.115426
ENSG00000233541	4.73003	5.62338	1.72291	3.26388	0.00109898	0.115426
ENSG00000258220	10.6947	-4.9305	1.51226	-3.26036	0.00111271	0.11643
ENSG00000180881	583.823	1.04459	0.320839	3.25581	0.00113068	0.117869
ENSG00000092439	1910.85	0.395842	0.121663	3.25359	0.00113955	0.118245
ENSG00000166923	63.1913	3.5226	1.08295	3.2528	0.00114275	0.118245
ENSG00000154269	68.7124	-1.95237	0.600893	-3.24911	0.00115767	0.119347
ENSG00000119866	920.737	0.908839	0.280106	3.24462	0.00117607	0.120215
ENSG00000174473	776.659	0.736574	0.227064	3.24391	0.001179	0.120215
ENSG00000251634	20.6102	1.58107	0.487263	3.2448	0.00117532	0.120215
ENSG00000162992	741.322	-0.722439	0.222855	-3.24175	0.001188	0.120692
ENSG00000179636	45.931	-2.59486	0.801099	-3.23912	0.00119899	0.121097
ENSG00000259485	117.356	-1.47931	0.456787	-3.2385	0.00120158	0.121097
ENSG00000100116	1522.42	-0.797241	0.246237	-3.2377	0.00120499	0.121097
ENSG00000242193	13.811	3.1613	0.977796	3.23309	0.00122459	0.121753
ENSG00000146278	246.187	-0.763911	0.236249	-3.2335	0.00122283	0.121753
ENSG00000267382	12.1302	4.80224	1.4846	3.2347	0.00121769	0.121753
ENSG00000138029	5033.5	-0.239143	0.0740719	-3.22852	0.00124432	0.123275
ENSG00000255332	76.1192	-1.06586	0.330726	-3.22279	0.00126947	0.124444
ENSG00000265128	6.55783	4.33641	1.34474	3.22471	0.00126098	0.124444
ENSG00000279539	7.27526	5.23797	1.62522	3.22294	0.00126883	0.124444
ENSG00000075239	10954.4	-0.221913	0.0689131	-3.22019	0.00128106	0.125141
ENSG00000133135	798.698	0.860857	0.267774	3.21487	0.00130504	0.127039
ENSG00000076003	1519.92	-0.567947	0.176837	-3.2117	0.00131953	0.12756
ENSG00000163320	12184	0.300282	0.0934829	3.21216	0.0013174	0.12756
ENSG00000178201	64.1643	2.39161	0.745796	3.20679	0.00134224	0.129308
ENSG00000123496	233.757	-1.2091	0.377544	-3.20255	0.00136217	0.129846
ENSG00000156687	689.597	0.874898	0.273294	3.20131	0.00136806	0.129846
ENSG00000149256	732.524	0.619933	0.193688	3.20068	0.00137106	0.129846
ENSG00000182645	9.74491	5.67355	1.7725	3.20088	0.00137011	0.129846
ENSG00000179958	4367.31	-0.328035	0.102458	-3.20166	0.00136638	0.129846
ENSG00000271533	432.352	1.22335	0.38307	3.19354	0.00140539	0.132647
ENSG00000231739	6.2689	3.55594	1.11507	3.18899	0.00142769	0.13274
ENSG00000114204	587.907	0.816146	0.255683	3.19201	0.00141284	0.13274
ENSG00000187601	10205.2	0.164401	0.0515195	3.19104	0.00141763	0.13274
ENSG00000181195	2418.22	0.418937	0.13139	3.1885	0.00143012	0.13274
ENSG00000198131	995.34	0.493536	0.154729	3.18969	0.00142428	0.13274
ENSG00000254802	30.0409	-1.30279	0.409165	-3.18402	0.00145243	0.134364
ENSG00000198727	140883	-0.243293	0.0765272	-3.17918	0.00147694	0.136181
ENSG00000168275	3189.72	-0.37809	0.118966	-3.17814	0.00148226	0.136221
ENSG00000153094	241.715	1.08889	0.342844	3.17603	0.00149303	0.136762
ENSG00000106537	27994	0.179505	0.0566092	3.17096	0.00151938	0.138268
ENSG00000224906	10.6159	-2.12813	0.67098	-3.17167	0.00151564	0.138268
ENSG00000265222	6.99909	6.18956	1.9535	3.16845	0.00153256	0.139016
ENSG00000214144	6.84017	-5.33296	1.6855	-3.16402	0.00155605	0.140405
ENSG00000230188	14.0609	3.98754	1.26042	3.16367	0.00155793	0.140405
ENSG00000166250	1448.82	-0.630982	0.1996	-3.16124	0.00157099	0.140674
ENSG00000279330	21.7849	3.56622	1.12805	3.16142	0.00157004	0.140674
ENSG00000224223	472.553	0.712776	0.225612	3.1593	0.00158147	0.14071
ENSG00000063854	8692.63	-0.22328	0.0706532	-3.16022	0.00157649	0.14071
ENSG00000286797	687.413	-0.377797	0.119663	-3.15717	0.00159306	0.141292
ENSG00000182134	4741.62	0.385776	0.122315	3.15396	0.00161069	0.142404
ENSG00000200597	10.2582	2.47581	0.786071	3.14959	0.00163498	0.143238
ENSG00000182916	20339.5	-0.323928	0.102851	-3.1495	0.00163551	0.143238
ENSG00000234465	660.684	-0.638303	0.202632	-3.15006	0.00163236	0.143238
ENSG00000186051	71.6445	-1.21292	0.386139	-3.14116	0.00168282	0.146911
ENSG00000224714	17.9741	3.94329	1.25572	3.14026	0.00168797	0.146911
ENSG00000184677	411.299	0.93587	0.298372	3.13659	0.00170925	0.147152
ENSG00000278997	9.78087	5.68732	1.81542	3.13278	0.00173156	0.147152
ENSG00000284659	4.44702	-5.70461	1.82175	-3.13139	0.00173978	0.147152
ENSG00000249721	6.13704	-5.17839	1.65332	-3.13211	0.00173553	0.147152
ENSG00000112238	7.74011	6.33432	2.02362	3.13019	0.00174691	0.147152
ENSG00000106603	11583.2	-0.222677	0.0710624	-3.13354	0.00172712	0.147152
ENSG00000255052	147.331	1.7359	0.553814	3.13444	0.00172184	0.147152
ENSG00000119139	10.3232	5.75798	1.83967	3.1299	0.00174868	0.147152
ENSG00000148408	632.973	0.434723	0.138696	3.13436	0.00172229	0.147152
ENSG00000187134	8279.42	0.218295	0.0696196	3.13554	0.00171541	0.147152
ENSG00000198453	856.99	-0.780566	0.248987	-3.13496	0.00171877	0.147152
ENSG00000241933	8.45171	5.47339	1.75093	3.126	0.00177203	0.148669
ENSG00000290924	5.63496	3.06985	0.982384	3.12489	0.00177869	0.148781
ENSG00000101311	34.0317	2.7094	0.867683	3.12256	0.00179284	0.149517
ENSG00000225733	5293.44	0.294641	0.09441	3.12087	0.00180317	0.149932
ENSG00000168497	8.09052	6.39983	2.05206	3.11873	0.00181633	0.150079
ENSG00000155275	68.0481	1.78187	0.57175	3.11653	0.00182994	0.150079
ENSG00000288090	9.58337	6.64002	2.12929	3.11842	0.00181826	0.150079
ENSG00000196668	149.957	0.914172	0.293305	3.11679	0.0018283	0.150079
ENSG00000261103	17.1503	-3.99088	1.28089	-3.11571	0.00183502	0.150079
ENSG00000171451	741.439	0.66733	0.214206	3.11537	0.00183717	0.150079
ENSG00000261319	8.38776	6.45168	2.07306	3.11215	0.0018573	0.15128
ENSG00000143995	1438.05	-0.842147	0.270785	-3.11002	0.00187076	0.151494
ENSG00000241462	29.8915	2.29805	0.738718	3.11086	0.00186546	0.151494
ENSG00000184635	1113.05	0.38233	0.123092	3.10604	0.0018961	0.153102
ENSG00000165359	849.853	0.595823	0.19198	3.10357	0.00191202	0.153943
ENSG00000116815	1186.38	-0.58327	0.188053	-3.10162	0.00192464	0.15407
ENSG00000283108	11.0997	3.01123	0.970612	3.10241	0.00191953	0.15407
ENSG00000254656	7.78783	3.54222	1.14248	3.10045	0.00193225	0.154238
ENSG00000179456	366.402	0.60255	0.194494	3.09804	0.00194808	0.154302
ENSG00000253333	93.831	0.626485	0.202165	3.09888	0.00194252	0.154302
ENSG00000148143	3373.6	0.396453	0.127979	3.0978	0.00194962	0.154302
ENSG00000180044	13.344	2.9777	0.962208	3.09466	0.00197041	0.155506
ENSG00000235621	16.9192	3.5072	1.13484	3.0905	0.00199822	0.157257
ENSG00000260853	55.0292	1.19796	0.387845	3.08875	0.00201002	0.157356
ENSG00000160194	5743.35	-0.218829	0.0708497	-3.08864	0.00201074	0.157356
ENSG00000215196	498.056	0.650361	0.210747	3.08598	0.00202884	0.158029
ENSG00000197935	266.081	0.750658	0.243269	3.08571	0.00203065	0.158029
ENSG00000249763	12.5643	-7.20946	2.339	-3.08228	0.00205423	0.159419
ENSG00000234494	244.679	-1.05947	0.343895	-3.0808	0.00206445	0.159769
ENSG00000023697	2067.12	-0.619759	0.201387	-3.07746	0.00208776	0.161127
ENSG00000113407	17217.6	-0.145108	0.047169	-3.07634	0.00209557	0.161284
ENSG00000114656	386.955	0.606107	0.19718	3.07388	0.00211292	0.16146
ENSG00000172348	36192.6	-0.318416	0.103598	-3.07356	0.0021152	0.16146
ENSG00000237595	269.86	-0.706425	0.229831	-3.07367	0.00211444	0.16146
ENSG00000197993	8.37058	6.44793	2.09862	3.07246	0.002123	0.161614
ENSG00000060718	846.584	0.700579	0.228082	3.07161	0.00212909	0.161615
ENSG00000135905	2060.85	-0.608084	0.198019	-3.07084	0.00213458	0.161615
ENSG00000291113	1264.91	-0.233035	0.0760019	-3.06617	0.0021682	0.163517
ENSG00000260790	5.41327	4.03635	1.31661	3.06573	0.00217141	0.163517
ENSG00000197747	11177.5	-0.34322	0.111992	-3.06469	0.00217896	0.163644
ENSG00000115474	38.9719	1.83954	0.600419	3.06376	0.00218574	0.163713
ENSG00000152558	197.57	1.29459	0.422905	3.06118	0.00220466	0.164689
ENSG00000289522	140.305	0.839205	0.274234	3.06017	0.00221208	0.164803
ENSG00000128606	85.5021	1.59502	0.521488	3.05859	0.0022238	0.164824
ENSG00000198417	3362.06	-0.505765	0.165404	-3.05775	0.00223007	0.164824
ENSG00000158445	1477.58	0.511482	0.167244	3.05829	0.00222601	0.164824
ENSG00000168461	4735.81	-0.708528	0.231784	-3.05685	0.00223678	0.164884
ENSG00000204438	3228.67	-0.261333	0.0855308	-3.05543	0.0022474	0.165231
ENSG00000115380	427.848	0.761203	0.250007	3.04473	0.00232888	0.170325
ENSG00000270069	48.028	-1.16022	0.381026	-3.045	0.00232684	0.170325
ENSG00000183814	455.524	-0.592406	0.194652	-3.0434	0.00233918	0.170632
ENSG00000055732	13.3362	7.11885	2.33976	3.04255	0.0023458	0.170669
ENSG00000225706	439.08	0.448305	0.14761	3.0371	0.00238865	0.172886
ENSG00000280214	7.39969	3.74151	1.23179	3.03745	0.00238593	0.172886
ENSG00000196141	3621.11	-0.366839	0.120838	-3.03579	0.00239908	0.173192
ENSG00000145721	411.696	-1.19269	0.393044	-3.03449	0.00240944	0.173492
ENSG00000187193	292.324	-0.561608	0.185188	-3.03263	0.00242431	0.174114
ENSG00000109519	7527.47	-0.328452	0.108505	-3.02707	0.0024694	0.176898
ENSG00000125945	4463.51	-0.279481	0.092433	-3.0236	0.00249785	0.177864
ENSG00000272359	3.62359	5.23963	1.73238	3.02454	0.00249013	0.177864
ENSG00000231290	14.0305	4.05279	1.34061	3.0231	0.00250199	0.177864
ENSG00000114638	16.66	4.03132	1.33411	3.02173	0.00251337	0.17822
ENSG00000170325	535.245	0.887291	0.293898	3.01904	0.00253577	0.17928
ENSG00000280088	263.542	-0.703917	0.233209	-3.0184	0.00254115	0.17928
ENSG00000198502	1098.72	-0.535785	0.177688	-3.01531	0.00256715	0.180657
ENSG00000265713	200.285	1.04713	0.347514	3.01321	0.00258496	0.181454
ENSG00000133020	908.371	-1.14876	0.381706	-3.00954	0.00261639	0.183188
ENSG00000267002	796.186	0.501456	0.166663	3.0088	0.00262278	0.183188
ENSG00000223685	35.0187	-1.70064	0.565657	-3.00648	0.0026429	0.184133
ENSG00000270575	8.06332	-3.93102	1.30787	-3.00568	0.0026499	0.184162
ENSG00000214491	8.24783	5.4396	1.81057	3.00436	0.00266142	0.184503
ENSG00000240563	130.976	-1.91588	0.639458	-2.99609	0.00273462	0.184998
ENSG00000224830	11.9665	3.73822	1.24495	3.0027	0.00267594	0.184998
ENSG00000134369	7010.36	0.252618	0.0843935	2.99333	0.0027595	0.184998
ENSG00000229994	68.0071	1.09287	0.36466	2.99695	0.00272695	0.184998
ENSG00000272121	980.097	-0.510538	0.170309	-2.99772	0.00272011	0.184998
ENSG00000163959	40.2921	2.16458	0.721512	3.00007	0.0026992	0.184998
ENSG00000168032	69.389	2.14455	0.716403	2.9935	0.00275795	0.184998
ENSG00000233067	5.3281	-4.9541	1.65413	-2.99499	0.00274456	0.184998
ENSG00000174417	10.8214	5.01552	1.67144	3.00073	0.00269338	0.184998
ENSG00000287901	10.5261	-6.95634	2.3241	-2.99314	0.00276127	0.184998
ENSG00000148730	7027.84	0.261376	0.0872893	2.99437	0.00275015	0.184998
ENSG00000132953	1464.69	0.45965	0.15333	2.99778	0.00271954	0.184998
ENSG00000171766	1120.34	0.377466	0.125787	3.00084	0.00269233	0.184998
ENSG00000103490	68.4966	-0.947559	0.315928	-2.99929	0.00270608	0.184998
ENSG00000071462	6717.01	-0.222023	0.0742443	-2.99044	0.00278579	0.186195
ENSG00000237206	12.9553	-7.25293	2.43053	-2.98409	0.0028442	0.188297
ENSG00000185448	11.9138	-7.1354	2.39085	-2.98447	0.00284074	0.188297
ENSG00000167081	6180.42	-0.379763	0.127259	-2.98417	0.0028435	0.188297
ENSG00000242715	534.948	5.64785	1.89149	2.98592	0.00282725	0.188297
ENSG00000163157	26.3031	1.70348	0.572736	2.97428	0.00293676	0.190459
ENSG00000248740	21.0592	-4.16992	1.4024	-2.97342	0.00294503	0.190459
ENSG00000112312	2087.5	-0.407105	0.136889	-2.97398	0.00293961	0.190459
ENSG00000197977	499.703	0.951118	0.31986	2.97355	0.00294378	0.190459
ENSG00000265817	402.495	0.77377	0.260151	2.97432	0.00293642	0.190459
ENSG00000135048	1715.99	0.527546	0.177304	2.97538	0.00292624	0.190459
ENSG00000261219	69.135	-1.4821	0.498302	-2.9743	0.00293654	0.190459
ENSG00000134769	10892	-0.255326	0.0857532	-2.97745	0.0029066	0.190459
ENSG00000141759	3937.69	-0.386489	0.129796	-2.97765	0.00290463	0.190459
ENSG00000286613	21.1027	-1.44845	0.487044	-2.97396	0.00293983	0.190459
ENSG00000123983	20401.7	0.376661	0.126818	2.97009	0.0029771	0.190766
ENSG00000070476	215.917	0.732811	0.246725	2.97015	0.00297657	0.190766
ENSG00000235257	131.154	0.715545	0.240805	2.97147	0.00296377	0.190766
ENSG00000176840	776.515	0.495927	0.166952	2.97049	0.00297328	0.190766
ENSG00000279090	6.081	-6.16351	2.07712	-2.96734	0.00300392	0.192045
ENSG00000188732	2074.63	0.534698	0.180284	2.96587	0.00301826	0.192521
ENSG00000289187	256.846	1.22377	0.41275	2.96491	0.00302772	0.192684
ENSG00000225670	12.715	5.42297	1.82963	2.96397	0.00303702	0.192699
ENSG00000126953	1591.44	-0.520114	0.175507	-2.96349	0.00304175	0.192699
ENSG00000287134	5.68374	3.49123	1.17842	2.96264	0.00305015	0.192794
ENSG00000249106	199.036	1.02835	0.347268	2.96125	0.00306395	0.192847
ENSG00000237088	5.90678	5.94517	2.00771	2.96116	0.00306479	0.192847
ENSG00000287114	3.53303	4.68969	1.5846	2.95955	0.00308094	0.193427
ENSG00000206120	1305.77	0.550596	0.186103	2.95856	0.00309083	0.193614
ENSG00000132623	1297.52	-0.369718	0.125062	-2.95627	0.00311388	0.194621
ENSG00000232958	4.84896	3.75641	1.27191	2.95336	0.00314335	0.196025
ENSG00000198075	2069	-0.464545	0.157402	-2.95133	0.00316405	0.196285
ENSG00000273061	287.857	-0.591872	0.200574	-2.95089	0.00316861	0.196285
ENSG00000127324	3.47986	5.18397	1.75657	2.95119	0.00316553	0.196285
ENSG00000178394	8.19926	5.41812	1.83733	2.9489	0.00318902	0.19644
ENSG00000171202	3520.21	-0.315828	0.107102	-2.94884	0.0031897	0.19644
ENSG00000130035	707.893	-0.474257	0.160879	-2.94792	0.00319924	0.19644
ENSG00000129235	6949.09	-0.306246	0.10388	-2.94808	0.0031975	0.19644
ENSG00000215237	210.852	-0.515692	0.175205	-2.94337	0.00324659	0.198911
ENSG00000224019	6.29078	6.03473	2.0528	2.93975	0.00328475	0.20037
ENSG00000170419	7420.88	0.330366	0.112371	2.93996	0.00328255	0.20037
ENSG00000269889	28.5814	2.15838	0.734871	2.93708	0.00331314	0.201661
ENSG00000123131	18947.2	-0.307334	0.104808	-2.93235	0.00336411	0.203993
ENSG00000198324	43.3941	1.72535	0.588463	2.93197	0.00336825	0.203993
ENSG00000233532	9.86748	-6.86273	2.34104	-2.93149	0.00337336	0.203993
ENSG00000235833	71.1469	1.03857	0.35441	2.93042	0.00338499	0.204255
ENSG00000162374	585.041	-0.549033	0.187515	-2.92795	0.00341208	0.204584
ENSG00000239388	115.272	0.991671	0.338695	2.92792	0.00341242	0.204584
ENSG00000227716	29.6468	2.05144	0.700385	2.92902	0.00340036	0.204584
ENSG00000224318	227.917	-0.740254	0.253033	-2.92553	0.00343871	0.205455
ENSG00000288800	27.9248	2.35754	0.805925	2.92526	0.00344166	0.205455
ENSG00000232812	18.2471	-3.56908	1.22084	-2.92345	0.00346173	0.206203
ENSG00000126088	10225.5	-0.312619	0.106969	-2.92253	0.00347203	0.206203
ENSG00000287374	5.10982	-4.91493	1.68234	-2.92148	0.00348371	0.206203
ENSG00000269973	229.273	-0.635393	0.217459	-2.9219	0.00347904	0.206203
ENSG00000206075	11.2159	6.86868	2.35164	2.9208	0.00349133	0.206217
ENSG00000116701	17.7531	-4.82434	1.65237	-2.91964	0.00350434	0.206549
ENSG00000221826	13.816	-6.36436	2.18082	-2.91833	0.00351908	0.206981
ENSG00000174279	55.4676	1.63398	0.560868	2.91331	0.00357616	0.209457
ENSG00000158164	14331.2	0.253993	0.0871821	2.91336	0.00357566	0.209457
ENSG00000165194	1364.25	0.609689	0.209398	2.91163	0.00359546	0.210146
ENSG00000102984	526.541	0.691661	0.237675	2.91011	0.00361303	0.210669
ENSG00000198804	301436	-0.224332	0.0771018	-2.90955	0.00361948	0.210669
ENSG00000237187	32.0007	2.56891	0.884119	2.90561	0.00366537	0.212896
ENSG00000097046	4592.84	-0.336382	0.115807	-2.90467	0.00367643	0.213096
ENSG00000248901	5.95011	5.95637	2.05198	2.90275	0.00369905	0.213203
ENSG00000146070	304.416	-0.943226	0.324973	-2.90247	0.00370231	0.213203
ENSG00000253583	222.245	-0.807982	0.27843	-2.90192	0.0037088	0.213203
ENSG00000167178	182.133	0.597119	0.205745	2.90223	0.00370519	0.213203
ENSG00000273763	408.306	-0.469588	0.16205	-2.8978	0.00375793	0.213392
ENSG00000289153	37.6735	-1.26896	0.437717	-2.89903	0.00374315	0.213392
ENSG00000248988	32.8837	-0.924352	0.318965	-2.89797	0.00375585	0.213392
ENSG00000203734	139.291	-1.03081	0.355488	-2.89971	0.00373504	0.213392
ENSG00000289788	18.4425	2.26854	0.782447	2.89928	0.00374016	0.213392
ENSG00000205922	3418.51	0.485783	0.167609	2.89831	0.00375177	0.213392
ENSG00000139718	221.157	0.681478	0.235245	2.89689	0.00376883	0.213577
ENSG00000279254	33.6231	2.82632	0.976697	2.89376	0.00380661	0.213721
ENSG00000164073	3382.79	-0.274545	0.094883	-2.89351	0.00380962	0.213721
ENSG00000186416	2424.02	-0.326245	0.112724	-2.8942	0.00380121	0.213721
ENSG00000286850	113.554	0.592132	0.204478	2.89582	0.00378163	0.213721
ENSG00000277399	15.9461	-4.1982	1.45065	-2.89402	0.00380349	0.213721
ENSG00000160293	212.126	0.901046	0.311557	2.89207	0.0038271	0.214271
ENSG00000260583	199.238	-0.522386	0.180708	-2.89078	0.00384293	0.214727
ENSG00000121486	5095.6	0.263879	0.0913838	2.88759	0.0038821	0.214867
ENSG00000248544	25.248	1.99697	0.691905	2.8862	0.00389927	0.214867
ENSG00000168481	13.0576	-6.28493	2.17573	-2.88865	0.00386904	0.214867
ENSG00000185585	16.6841	4.12041	1.42634	2.88881	0.00386709	0.214867
ENSG00000048828	488.166	0.535834	0.185627	2.88662	0.00389399	0.214867
ENSG00000285572	22.4997	-3.35323	1.1606	-2.88922	0.00386198	0.214867
ENSG00000154258	173.447	1.18254	0.40969	2.88643	0.00389637	0.214867
ENSG00000213760	18191.5	-0.245551	0.0851778	-2.8828	0.00394156	0.21677
ENSG00000274840	46.1151	-1.40965	0.489556	-2.87944	0.00398378	0.218233
ENSG00000147082	746.144	0.639183	0.221968	2.87961	0.00398161	0.218233
ENSG00000179588	16.4517	1.72125	0.598031	2.8782	0.00399951	0.218666
ENSG00000135111	1972.13	-0.437217	0.152064	-2.87522	0.00403744	0.220308
ENSG00000224046	206.412	-0.718464	0.250066	-2.8731	0.00406466	0.221362
ENSG00000231908	165.547	-0.849405	0.295874	-2.87084	0.00409386	0.222518
ENSG00000163125	3356.46	0.408225	0.14243	2.86614	0.00415515	0.224944
ENSG00000227203	10.6318	-2.95949	1.03258	-2.8661	0.00415558	0.224944
ENSG00000148484	9839.45	-0.321925	0.112358	-2.86518	0.00416766	0.224944
ENSG00000261371	18.9793	-7.11188	2.48237	-2.86495	0.0041707	0.224944
ENSG00000224087	3.76425	5.29896	1.85114	2.86254	0.00420255	0.225683
ENSG00000151470	2419.55	-0.34211	0.119535	-2.86201	0.00420964	0.225683
ENSG00000198948	530.547	-0.509554	0.177972	-2.86312	0.00419489	0.225683
ENSG00000274022	4.76186	-5.30374	1.8535	-2.86148	0.00421671	0.225683
ENSG00000261770	189.698	-1.36805	0.478269	-2.86043	0.00423072	0.226
ENSG00000139266	1284.74	0.392549	0.137338	2.85827	0.00425961	0.227109
ENSG00000114021	5076.8	-0.319128	0.111723	-2.85643	0.00428439	0.227995
ENSG00000138483	5.25734	5.77657	2.02358	2.85463	0.00430876	0.228069
ENSG00000233420	8.6241	4.62781	1.62096	2.85498	0.00430397	0.228069
ENSG00000261762	172.453	-0.926769	0.324668	-2.85451	0.00431028	0.228069
ENSG00000231616	71.7124	1.66715	0.584483	2.85235	0.00433974	0.229194
ENSG00000272777	161.05	0.778062	0.272919	2.85089	0.00435972	0.229382
ENSG00000197467	20.2989	2.36105	0.828155	2.85098	0.00435844	0.229382
ENSG00000179397	109.435	1.43209	0.502809	2.84818	0.00439703	0.230731
ENSG00000286039	60.7545	-1.65938	0.582684	-2.84783	0.00440187	0.230731
ENSG00000125454	470.811	-0.520541	0.182935	-2.8455	0.00443419	0.231989
ENSG00000185250	289.131	0.64864	0.228173	2.84276	0.00447245	0.233554
ENSG00000213465	8230.72	-0.234741	0.0826276	-2.84096	0.00449786	0.234443
ENSG00000164818	133.354	0.840175	0.295825	2.84011	0.00450985	0.234564
ENSG00000109084	19111.1	0.429205	0.151178	2.83907	0.00452447	0.234564
ENSG00000235292	19.8195	-6.06687	2.13697	-2.83901	0.00452537	0.234564
ENSG00000163431	8.34612	4.87946	1.71968	2.83742	0.00454792	0.235122
ENSG00000176641	2144.07	0.35725	0.125922	2.83707	0.00455298	0.235122
ENSG00000260618	22.4433	1.90749	0.672535	2.83627	0.00456436	0.235275
ENSG00000283178	6.28779	-2.8748	1.01385	-2.83554	0.00457485	0.235382
ENSG00000151322	484.951	0.89571	0.316357	2.83133	0.00463548	0.238043
ENSG00000248905	353.535	-0.840042	0.296754	-2.83077	0.00464362	0.238043
ENSG00000154310	2777.63	0.359782	0.127166	2.82924	0.00466586	0.238309
ENSG00000172995	996.481	-0.556561	0.196697	-2.82953	0.00466163	0.238309
ENSG00000232215	3.32617	5.12084	1.8121	2.82592	0.00471455	0.239374
ENSG00000255547	5.8905	4.12653	1.46023	2.82594	0.00471425	0.239374
ENSG00000289889	9.34621	-6.78333	2.40077	-2.82548	0.004721	0.239374
ENSG00000203999	7.26273	-5.43497	1.92278	-2.82662	0.00470419	0.239374
ENSG00000291155	38.6838	-1.21562	0.430526	-2.82357	0.00474925	0.240191
ENSG00000280155	9.82256	-6.85401	2.42772	-2.82323	0.00475429	0.240191
ENSG00000107882	203.087	0.885272	0.313727	2.82179	0.00477563	0.240833
ENSG00000088881	120.904	-0.7093	0.251515	-2.82011	0.00480065	0.241659
ENSG00000196071	197.435	1.17565	0.416966	2.81953	0.00480941	0.241664
ENSG00000290551	82.6617	-1.16822	0.41458	-2.81783	0.00483494	0.242511
ENSG00000139990	5589.56	0.287472	0.102117	2.81511	0.00487598	0.244131
ENSG00000183378	57.731	-1.29271	0.459396	-2.81394	0.00489387	0.244152
ENSG00000150093	13988.7	-0.282393	0.100339	-2.81439	0.00488692	0.244152
ENSG00000258565	5.2596	5.77875	2.05426	2.81306	0.00490723	0.244382
ENSG00000143198	20542.1	-0.216571	0.0770641	-2.81027	0.00495005	0.244769
ENSG00000166884	5.27054	5.77936	2.05577	2.81128	0.00493444	0.244769
ENSG00000275898	6.95368	5.17232	1.84047	2.81033	0.00494911	0.244769
ENSG00000007520	166.375	-0.676165	0.24057	-2.81068	0.00494371	0.244769
ENSG00000156928	3474.15	-0.326026	0.116095	-2.80826	0.00498099	0.245864
ENSG00000061987	4312.56	0.32788	0.116829	2.8065	0.00500824	0.246773
ENSG00000164932	1543.45	-0.501032	0.17857	-2.8058	0.00501913	0.246874
ENSG00000173698	2566.59	0.393459	0.140365	2.80311	0.00506128	0.247701
ENSG00000164944	3925.17	0.377319	0.134611	2.80303	0.00506254	0.247701
ENSG00000226864	60.2435	1.17548	0.419199	2.8041	0.00504571	0.247701
ENSG00000127954	15.1309	-3.27129	1.16764	-2.80163	0.00508448	0.24834
ENSG00000288905	68.7984	-1.29392	0.462022	-2.80056	0.00510139	0.248485
ENSG00000134504	663.646	0.49381	0.176341	2.80032	0.00510525	0.248485
ENSG00000162877	35.0586	1.43628	0.513334	2.79794	0.00514301	0.249093
ENSG00000220848	88.3185	1.20645	0.43108	2.79867	0.00513136	0.249093
ENSG00000137814	1376.23	-0.453233	0.161994	-2.79784	0.00514448	0.249093
ENSG00000169871	85.9833	-1.45341	0.519857	-2.79579	0.00517733	0.25025
ENSG00000167315	1299.8	-0.497074	0.177936	-2.79356	0.00521311	0.25119
ENSG00000234187	13.2381	3.16796	1.13429	2.7929	0.00522376	0.25119
ENSG00000256073	191.027	-1.223	0.437849	-2.7932	0.00521891	0.25119
ENSG00000079689	281.568	-0.619536	0.222031	-2.79031	0.0052657	0.251476
ENSG00000228667	4.01004	3.30999	1.18617	2.79049	0.00526287	0.251476
ENSG00000185650	94.1498	1.72596	0.618521	2.79047	0.00526317	0.251476
ENSG00000267454	1478.92	-0.468272	0.16781	-2.79049	0.0052629	0.251476
ENSG00000277702	27.6265	-1.23928	0.444571	-2.78759	0.00531013	0.25269
ENSG00000150394	4694	0.401722	0.144136	2.7871	0.00531826	0.25269
ENSG00000118160	161.833	0.859766	0.308393	2.78789	0.00530523	0.25269
ENSG00000250938	142.098	-0.61924	0.222235	-2.78642	0.00532933	0.252786
ENSG00000217330	10.1793	3.98989	1.43223	2.78579	0.00533972	0.25285
ENSG00000135931	1872.83	0.241438	0.0866885	2.78513	0.00535066	0.252939
ENSG00000250159	6.02655	4.36481	1.56967	2.78073	0.00542374	0.254981
ENSG00000198478	13314.3	-0.214861	0.0772639	-2.78087	0.00542136	0.254981
ENSG00000139292	17.0318	-4.00286	1.439	-2.7817	0.00540753	0.254981
ENSG00000123096	194.764	-0.848547	0.305196	-2.78033	0.00543038	0.254981
ENSG00000198189	2606.82	-0.419144	0.150787	-2.7797	0.00544084	0.255044
ENSG00000140395	8263.68	-0.215989	0.0777412	-2.7783	0.00546435	0.255717
ENSG00000269956	65.9886	-1.25217	0.450858	-2.77729	0.00548136	0.256084
ENSG00000258215	13.7043	3.73908	1.34789	2.77402	0.00553677	0.258241
ENSG00000120217	75.9748	3.17853	1.1463	2.77287	0.00555643	0.258408
ENSG00000134160	5.49948	5.84286	2.10726	2.77273	0.00555886	0.258408
ENSG00000253252	21.4397	1.83384	0.662029	2.77003	0.00560517	0.260128
ENSG00000260816	15.4563	-3.10627	1.12167	-2.76932	0.00561735	0.260261
ENSG00000226254	3.54395	5.21213	1.88542	2.76443	0.00570218	0.263364
ENSG00000196741	177.137	0.998696	0.361273	2.76438	0.00570318	0.263364
ENSG00000169760	3388.43	0.37467	0.135592	2.76321	0.00572358	0.26387
ENSG00000106536	2070.73	0.475974	0.172293	2.76258	0.00573467	0.263916
ENSG00000204131	345.286	-0.890173	0.322284	-2.76208	0.00574346	0.263916
ENSG00000251170	11.1723	1.71523	0.62127	2.76084	0.00576532	0.264485
ENSG00000254560	134.444	-1.04675	0.379301	-2.75967	0.0057859	0.264994
ENSG00000106236	1256.72	-0.509825	0.184852	-2.75802	0.00581522	0.265884
ENSG00000102763	717.232	-0.545066	0.197743	-2.75644	0.0058434	0.265884
ENSG00000169189	6132.18	-0.244179	0.0885837	-2.75648	0.00584276	0.265884
ENSG00000214140	510.286	-0.600125	0.217634	-2.75749	0.00582465	0.265884
ENSG00000288917	501.545	0.639594	0.232265	2.75373	0.00589205	0.267662
ENSG00000118292	124.505	-0.892273	0.324227	-2.752	0.00592323	0.268642
ENSG00000287932	3.82436	4.80183	1.74612	2.75	0.00595961	0.268981
ENSG00000229990	6.59443	5.10683	1.8566	2.75063	0.00594801	0.268981
ENSG00000235823	3354.92	0.431369	0.15686	2.75003	0.00595899	0.268981
ENSG00000241231	23.4094	2.02359	0.736051	2.74925	0.00597317	0.269113
ENSG00000175356	174.32	1.29109	0.469694	2.74878	0.00598178	0.269113
ENSG00000287775	4.80767	5.64737	2.05546	2.7475	0.00600513	0.269296
ENSG00000168143	10.0203	6.70766	2.44122	2.74766	0.0060022	0.269296
ENSG00000124802	4761.77	-0.340415	0.123948	-2.74644	0.00602466	0.269739
ENSG00000178385	2117.12	0.312174	0.113693	2.74577	0.00603693	0.269855
ENSG00000104442	7208.89	0.237998	0.0868354	2.7408	0.00612905	0.273536
ENSG00000289535	55.5857	-1.52427	0.556361	-2.73971	0.00614935	0.274004
ENSG00000158234	3050.4	-0.363879	0.132932	-2.73734	0.00619381	0.274236
ENSG00000145287	7.14777	4.55509	1.66387	2.73765	0.00618803	0.274236
ENSG00000269506	4.88823	-5.84699	2.13501	-2.73862	0.00616971	0.274236
ENSG00000104722	133782	-0.210444	0.0768533	-2.73825	0.00617665	0.274236
ENSG00000118733	7498.8	0.305679	0.111738	2.73568	0.00622508	0.275184
ENSG00000037241	6767.69	-0.384878	0.140728	-2.7349	0.00623986	0.275402
ENSG00000109819	1592.76	-0.392185	0.143464	-2.73369	0.00626288	0.275982
ENSG00000152954	2950.89	0.208619	0.0763421	2.73269	0.00628194	0.276385
ENSG00000120669	52.2078	1.65576	0.606176	2.73148	0.0063051	0.276969
ENSG00000143355	3790.69	0.408346	0.149579	2.72996	0.00633423	0.277376
ENSG00000110492	17194.5	-0.261253	0.0956918	-2.73015	0.00633057	0.277376
ENSG00000006128	4695.46	-0.254319	0.0932847	-2.72627	0.00640553	0.280059
ENSG00000163960	2206.37	0.326621	0.119829	2.72574	0.00641581	0.28007
ENSG00000188015	83.0854	-1.27124	0.466524	-2.72492	0.00643174	0.280327
ENSG00000286568	6.91864	-5.34992	1.96501	-2.72259	0.00647717	0.281868
ENSG00000186310	53426.6	0.229689	0.0843867	2.72186	0.00649159	0.282056
ENSG00000227542	54.9006	1.49566	0.549762	2.72055	0.00651732	0.282296
ENSG00000186687	5634.68	-0.464892	0.170874	-2.72067	0.00651497	0.282296
ENSG00000113722	5.84412	4.24159	1.55966	2.71956	0.00653692	0.282452
ENSG00000086730	54.8592	1.28513	0.472589	2.71934	0.00654115	0.282452
ENSG00000290827	5.46195	5.8311	2.14825	2.71435	0.00664054	0.286301
ENSG00000279110	26.8919	2.46236	0.908074	2.71163	0.0066954	0.288222
ENSG00000224121	5.09272	5.72892	2.11427	2.70964	0.00673559	0.288776
ENSG00000254003	19.9383	-1.59821	0.589753	-2.70997	0.00672896	0.288776
ENSG00000137154	25334.5	-0.24229	0.0894237	-2.70946	0.00673928	0.288776
ENSG00000214369	29.2451	1.78351	0.658385	2.70892	0.00675022	0.288802
ENSG00000286358	426.1	-0.729024	0.26932	-2.70691	0.00679126	0.290114
ENSG00000145692	9.92338	4.33658	1.60335	2.7047	0.00683656	0.291603
ENSG00000267280	23.2828	-1.38027	0.510446	-2.70405	0.00684998	0.29173
ENSG00000136783	15059.9	-0.259617	0.0960593	-2.70268	0.00687834	0.292492
ENSG00000135333	2854.71	0.676035	0.250215	2.70181	0.00689628	0.292809
ENSG00000183876	9.07933	6.56374	2.4323	2.69857	0.00696373	0.293886
ENSG00000113448	2946.22	-0.378621	0.140304	-2.69858	0.00696368	0.293886
ENSG00000104518	79.0309	-2.03362	0.753224	-2.69989	0.00693631	0.293886
ENSG00000153885	271.465	-0.785966	0.291193	-2.69912	0.00695223	0.293886
ENSG00000185420	5960.52	-0.212451	0.0788723	-2.69361	0.00706818	0.295701
ENSG00000232445	140.821	-0.74576	0.276639	-2.69578	0.00702236	0.295701
ENSG00000204118	17.949	3.59457	1.33452	2.69352	0.00707023	0.295701
ENSG00000234779	16.5503	2.50975	0.931439	2.69449	0.00704963	0.295701
ENSG00000110060	1874.57	-0.344354	0.127795	-2.69457	0.00704789	0.295701
ENSG00000289208	336.08	1.2805	0.475129	2.69507	0.00703746	0.295701
ENSG00000271427	6.11736	-3.10403	1.15327	-2.69151	0.00711293	0.296181
ENSG00000145569	3909.39	0.39212	0.145753	2.69031	0.0071386	0.296181
ENSG00000138587	102.507	0.789526	0.293505	2.68999	0.00714532	0.296181
ENSG00000166192	1596.76	-0.465025	0.172811	-2.69095	0.00712485	0.296181
ENSG00000174446	4609.8	-0.417592	0.155233	-2.6901	0.00714297	0.296181
ENSG00000212719	552.529	-0.693333	0.257617	-2.69133	0.00711677	0.296181
ENSG00000271290	5.46777	4.08335	1.52027	2.68593	0.00723287	0.299366
ENSG00000171867	17444.6	0.344515	0.128311	2.685	0.0072529	0.299751
ENSG00000120738	1072.62	0.678906	0.252988	2.68355	0.0072846	0.300616
ENSG00000178741	19968.4	-0.178406	0.0665248	-2.68179	0.00732283	0.301748
ENSG00000253302	18.7188	1.71767	0.641049	2.67946	0.00737402	0.30341
ENSG00000198744	43.6419	-0.75309	0.281201	-2.67812	0.00740374	0.304185
ENSG00000067955	58153.7	-0.468088	0.174823	-2.6775	0.00741748	0.304302
ENSG00000221263	3.42334	5.15475	1.92699	2.67502	0.0074724	0.304321
ENSG00000285610	6.1752	6.00615	2.24375	2.67684	0.00743212	0.304321
ENSG00000258413	83.3319	-0.985009	0.368203	-2.67518	0.00746897	0.304321
ENSG00000259964	911.409	-0.56627	0.211674	-2.6752	0.00746847	0.304321
ENSG00000267147	41.7396	-2.31609	0.865509	-2.67599	0.00745098	0.304321
ENSG00000183023	2094.96	0.643783	0.241177	2.66933	0.00760017	0.307034
ENSG00000164904	12805.7	0.259792	0.0973209	2.66943	0.0075979	0.307034
ENSG00000250120	454.238	-0.49953	0.187349	-2.66631	0.00766899	0.307034
ENSG00000272356	64.1546	1.49671	0.560994	2.66797	0.00763107	0.307034
ENSG00000226571	4.21778	4.44916	1.66871	2.66622	0.0076709	0.307034
ENSG00000147684	21511.2	-0.363277	0.136217	-2.6669	0.00765537	0.307034
ENSG00000213484	10.9808	5.85519	2.19375	2.66903	0.00760706	0.307034
ENSG00000167272	3324.13	-0.477213	0.178701	-2.67046	0.00757469	0.307034
ENSG00000205056	21.4589	2.02059	0.757093	2.66888	0.00761046	0.307034
ENSG00000262712	4.44669	4.51937	1.69468	2.66681	0.00765761	0.307034
ENSG00000187323	2142.42	0.523762	0.196275	2.6685	0.00761896	0.307034
ENSG00000237037	179.696	0.632715	0.236876	2.67109	0.00756062	0.307034
ENSG00000256546	338.489	-0.684695	0.256992	-2.66427	0.00771566	0.308384
ENSG00000231233	1108.05	-0.71405	0.268131	-2.66306	0.0077434	0.308609
ENSG00000100504	136.117	0.82193	0.308635	2.66311	0.0077422	0.308609
ENSG00000182077	18.0701	4.71361	1.77121	2.66123	0.00778548	0.309844
ENSG00000105976	3719.38	0.278712	0.104761	2.66046	0.00780346	0.310118
ENSG00000212461	4.45567	3.97284	1.49362	2.65987	0.00781709	0.310218
ENSG00000260920	221.636	-0.873724	0.328563	-2.65923	0.00783204	0.310367
ENSG00000226970	55.9145	-0.682631	0.256749	-2.65875	0.00784304	0.310367
ENSG00000227145	21.532	-7.98704	3.0046	-2.65827	0.00785426	0.310371
ENSG00000236977	8.48792	4.10033	1.54416	2.65538	0.00792201	0.311287
ENSG00000119782	437.936	-0.454339	0.171056	-2.65608	0.00790549	0.311287
ENSG00000135047	7435.47	-0.275302	0.103648	-2.65611	0.00790479	0.311287
ENSG00000280304	9.12802	6.57295	2.47533	2.65538	0.0079218	0.311287
ENSG00000162738	885.099	0.809499	0.305136	2.65291	0.00798004	0.313127
ENSG00000285971	25.4758	-1.78701	0.67482	-2.64813	0.00809379	0.317145
ENSG00000226765	5.04484	5.71493	2.15937	2.64657	0.00813128	0.317749
ENSG00000168779	388.226	-0.752757	0.284431	-2.64654	0.00813196	0.317749
ENSG00000169554	1426.88	0.429982	0.162531	2.64554	0.0081561	0.318247
ENSG00000134690	139.646	1.11172	0.42084	2.64167	0.00824986	0.318349
ENSG00000138085	6431.34	-0.456231	0.172624	-2.64291	0.00821971	0.318349
ENSG00000226306	57.9311	-2.63423	0.997131	-2.64181	0.00824632	0.318349
ENSG00000217447	5.42136	5.82304	2.20241	2.64395	0.00819458	0.318349
ENSG00000105887	7362.97	-0.205813	0.0779089	-2.64172	0.00824869	0.318349
ENSG00000102195	3195.04	0.556318	0.210526	2.64251	0.00822932	0.318349
ENSG00000156110	5629.78	-0.305795	0.115737	-2.64215	0.00823817	0.318349
ENSG00000102837	23.6327	7.94416	3.00431	2.64425	0.00818716	0.318349
ENSG00000289090	4.55474	5.57036	2.10932	2.64083	0.00827029	0.318643
ENSG00000141441	1622.41	0.522692	0.197958	2.64042	0.00828028	0.318643
ENSG00000184486	1100.04	0.754587	0.285975	2.63865	0.00832377	0.319876
ENSG00000251291	93.6104	-0.785236	0.297644	-2.63817	0.00833547	0.319885
ENSG00000183605	2684.84	-0.32029	0.12144	-2.63744	0.00835354	0.320139
ENSG00000198162	2359.56	0.403204	0.153072	2.63409	0.00843634	0.322869
ENSG00000253276	384.997	0.750308	0.285059	2.63212	0.00848546	0.324305
ENSG00000070785	10977	-0.366551	0.139302	-2.63135	0.00850464	0.324594
ENSG00000243144	8.89827	5.10361	1.94199	2.62803	0.00858816	0.32662
ENSG00000261243	26.6655	1.30948	0.49831	2.62784	0.00859279	0.32662
ENSG00000125827	14337.1	0.349207	0.132843	2.62872	0.00857081	0.32662
ENSG00000236253	21.2157	-3.34419	1.27403	-2.62489	0.00866759	0.328569
ENSG00000226792	8.53887	6.47569	2.46669	2.62526	0.00865834	0.328569
ENSG00000267632	37.1738	1.93193	0.736242	2.62404	0.00868936	0.328947
ENSG00000157240	460.858	0.682752	0.260313	2.62281	0.00872077	0.329305
ENSG00000069509	5514.37	-0.322534	0.122976	-2.62275	0.00872237	0.329305
ENSG00000173253	22.6157	-2.96546	1.13113	-2.62168	0.00874975	0.329893
ENSG00000167515	7491.13	-0.280676	0.107096	-2.62078	0.0087728	0.330316
ENSG00000206652	7.47552	3.16168	1.20708	2.61928	0.00881167	0.33043
ENSG00000213842	21.2547	1.84288	0.704071	2.61746	0.00885862	0.33043
ENSG00000170561	620.675	0.499787	0.190893	2.61815	0.00884076	0.33043
ENSG00000164347	5798.04	-0.282958	0.108057	-2.61859	0.00882929	0.33043
ENSG00000285904	62.4909	-1.58121	0.60396	-2.61807	0.00884284	0.33043
ENSG00000175063	61.823	1.59328	0.608646	2.61775	0.00885127	0.33043
ENSG00000267886	35.9237	2.12214	0.810053	2.61975	0.00879937	0.33043
ENSG00000106261	13316.1	0.216559	0.0828023	2.61538	0.00891294	0.332013
ENSG00000224128	25.516	1.30782	0.500165	2.61478	0.0089285	0.33215
ENSG00000104321	134.67	1.06545	0.407601	2.61396	0.00895	0.332507
ENSG00000158553	9.30709	6.59847	2.52804	2.61012	0.00905116	0.335818
ENSG00000116574	989.024	-0.545221	0.208985	-2.6089	0.00908328	0.336489
ENSG00000181019	1793.65	-0.34408	0.131906	-2.60853	0.00909332	0.336489
ENSG00000288048	8.34945	6.44148	2.47099	2.60684	0.00913819	0.337702
ENSG00000242110	9.92805	1.80313	0.692051	2.60548	0.00917454	0.337705
ENSG00000228624	460.514	-0.492799	0.189104	-2.60597	0.00916152	0.337705
ENSG00000236333	142.78	1.73514	0.665953	2.6055	0.00917391	0.337705
ENSG00000162692	16.6885	5.61474	2.15612	2.6041	0.00921164	0.33818
ENSG00000256315	684.016	0.435767	0.167322	2.60436	0.00920454	0.33818
ENSG00000230251	11.0855	-4.23962	1.62877	-2.60296	0.00924236	0.338731
ENSG00000112245	122.344	-0.78305	0.300868	-2.60264	0.00925091	0.338731
ENSG00000179008	221.037	-0.779307	0.299508	-2.60196	0.00926932	0.338961
ENSG00000250682	141.334	-0.701999	0.270033	-2.59968	0.00933102	0.340452
ENSG00000133935	16169.3	0.249301	0.0959012	2.59955	0.00933447	0.340452
ENSG00000235169	271.888	-0.734424	0.282573	-2.59906	0.00934798	0.340501
ENSG00000236939	165.144	-0.614501	0.236574	-2.5975	0.00939062	0.341412
ENSG00000106723	18182.5	0.215796	0.0831176	2.59627	0.00942413	0.341412
ENSG00000138279	7941.34	-0.357264	0.137617	-2.59607	0.00942972	0.341412
ENSG00000165609	4870.12	-0.256413	0.0987756	-2.59591	0.0094341	0.341412
ENSG00000105619	2568.34	-0.437387	0.168472	-2.5962	0.00942612	0.341412
ENSG00000225447	41.8066	1.11241	0.43009	2.58646	0.00969662	0.342051
ENSG00000283683	50.096	1.2161	0.470105	2.58687	0.00968519	0.342051
ENSG00000169641	1872.87	0.359251	0.138657	2.59093	0.00957177	0.342051
ENSG00000177551	5457.96	0.309593	0.119542	2.58984	0.00960215	0.342051
ENSG00000116120	20536.7	-0.249891	0.0963762	-2.59287	0.00951799	0.342051
ENSG00000144485	274.328	0.734031	0.28355	2.58872	0.00963326	0.342051
ENSG00000118523	191.205	3.0597	1.17973	2.59356	0.0094989	0.342051
ENSG00000204220	2106.69	-0.289209	0.11154	-2.59288	0.0095175	0.342051
ENSG00000249853	401.412	-0.895982	0.346373	-2.58676	0.00968838	0.342051
ENSG00000289611	2071.62	1.04644	0.404109	2.5895	0.00961148	0.342051
ENSG00000290563	3.90254	-5.52641	2.13336	-2.59046	0.00958466	0.342051
ENSG00000204055	3.63222	4.197	1.62221	2.58721	0.00967559	0.342051
ENSG00000151366	4863.36	-0.237111	0.0916026	-2.58847	0.00964035	0.342051
ENSG00000270874	100.715	1.52205	0.587499	2.59073	0.00957722	0.342051
ENSG00000139219	12.6331	4.40121	1.69815	2.59177	0.00954848	0.342051
ENSG00000184304	281.749	1.10576	0.426374	2.59342	0.00950275	0.342051
ENSG00000262904	81.7464	-1.72025	0.664181	-2.59003	0.00959664	0.342051
ENSG00000198003	28.4714	1.16444	0.449912	2.58814	0.00964957	0.342051
ENSG00000141837	781.459	0.394464	0.1525	2.58665	0.00969138	0.342051
ENSG00000276445	46.8786	1.69587	0.653845	2.59368	0.00949537	0.342051
ENSG00000286827	5.52389	5.84873	2.26287	2.58466	0.00974761	0.342983
ENSG00000286743	4.69067	5.6098	2.17025	2.58486	0.00974175	0.342983
ENSG00000183833	248.667	-0.877116	0.339702	-2.58201	0.00982253	0.344121
ENSG00000250317	2521.53	-0.266908	0.103381	-2.58178	0.00982922	0.344121
ENSG00000183077	497.494	-0.576107	0.223069	-2.58264	0.00980467	0.344121
ENSG00000188878	24.0878	-1.83595	0.710837	-2.58281	0.00980006	0.344121
ENSG00000280310	64.0558	1.33106	0.516092	2.57911	0.0099056	0.346237
ENSG00000233460	50.7134	1.36439	0.52908	2.5788	0.00991443	0.346237
ENSG00000285977	18.093	-2.47544	0.960332	-2.5777	0.00994617	0.346573
ENSG00000104973	65.1704	-0.868785	0.337052	-2.5776	0.00994888	0.346573
ENSG00000250107	18.8677	2.90922	1.12903	2.57676	0.0099732	0.346988
ENSG00000203963	4.49474	5.55301	2.15682	2.57463	0.0100348	0.348263
ENSG00000147655	10.6166	5.81113	2.25673	2.57502	0.0100234	0.348263
ENSG00000244300	342.983	-0.680006	0.264273	-2.57312	0.0100787	0.348569
ENSG00000146731	33253.6	-0.174647	0.0678759	-2.57304	0.010081	0.348569
ENSG00000286727	4.74292	5.6294	2.18724	2.57375	0.0100604	0.348569
ENSG00000152503	11518	0.363417	0.141265	2.5726	0.0100938	0.34858
ENSG00000118971	4414.94	0.499488	0.194219	2.57178	0.0101178	0.348976
ENSG00000113845	13105.9	-0.297065	0.115569	-2.57046	0.0101565	0.349879
ENSG00000283154	148.629	-0.911729	0.354964	-2.56851	0.0102137	0.351415
ENSG00000156384	1488.22	-0.458311	0.178591	-2.56626	0.0102802	0.351971
ENSG00000107669	9334.94	0.223393	0.0870333	2.56675	0.0102657	0.351971
ENSG00000287047	205.721	-0.720318	0.280607	-2.567	0.0102582	0.351971
ENSG00000236617	104.271	-0.78553	0.306059	-2.5666	0.0102702	0.351971
ENSG00000285591	9.09202	6.56758	2.55967	2.56579	0.010294	0.352013
ENSG00000275139	13.5216	3.59078	1.39975	2.56529	0.0103089	0.352091
ENSG00000227517	5.6128	4.86813	1.89885	2.56372	0.0103556	0.353252
ENSG00000152253	31.5273	2.55274	0.996492	2.56173	0.0104153	0.354382
ENSG00000163584	776.117	-0.424677	0.165787	-2.56158	0.0104196	0.354382
ENSG00000205704	47.0493	1.90806	0.744946	2.56135	0.0104267	0.354382
ENSG00000260030	57.2315	1.16537	0.455185	2.56021	0.0104608	0.354678
ENSG00000198938	131743	-0.27021	0.105539	-2.56029	0.0104584	0.354678
ENSG00000180532	7.58259	6.30304	2.464	2.55805	0.0105262	0.35646
ENSG00000280099	7.81209	4.47665	1.75199	2.55518	0.0106133	0.357352
ENSG00000154582	21451.2	-0.308831	0.12087	-2.55508	0.0106165	0.357352
ENSG00000166118	6.46079	5.08451	1.98871	2.55668	0.0105675	0.357352
ENSG00000237140	4.29418	5.48335	2.14606	2.55508	0.0106164	0.357352
ENSG00000176194	138.899	-0.74728	0.292467	-2.55509	0.010616	0.357352
ENSG00000179059	312.939	-0.824811	0.322944	-2.55404	0.0106481	0.357987
ENSG00000286320	73.7283	1.49978	0.587647	2.55218	0.0107052	0.359475
ENSG00000230530	26.1627	1.54158	0.604438	2.55043	0.0107591	0.359553
ENSG00000124875	12.8819	-7.2456	2.83999	-2.55128	0.0107329	0.359553
ENSG00000185187	172.903	-0.707321	0.277328	-2.55048	0.0107574	0.359553
ENSG00000148702	16.548	4.95617	1.94284	2.551	0.0107414	0.359553
ENSG00000231013	7.44269	-6.45506	2.53219	-2.5492	0.0107971	0.360199
ENSG00000175189	10.6357	3.65195	1.43272	2.54897	0.0108042	0.360199
ENSG00000248050	17.6436	-2.31675	0.909231	-2.54804	0.0108331	0.360305
ENSG00000103995	443.188	0.697694	0.273799	2.54819	0.0108282	0.360305
ENSG00000253430	3.80671	-5.48836	2.15524	-2.54651	0.0108805	0.360654
ENSG00000236444	12.0066	2.04904	0.804497	2.54699	0.0108657	0.360654
ENSG00000263874	2982.26	-0.382872	0.150355	-2.54645	0.0108824	0.360654
ENSG00000095587	57.5105	2.59101	1.01795	2.54532	0.0109179	0.361402
ENSG00000258733	4.75625	5.63197	2.21346	2.54441	0.0109461	0.361909
ENSG00000226148	5.41929	4.81597	1.89502	2.54138	0.0110417	0.362395
ENSG00000226840	7.58866	3.43327	1.35108	2.54113	0.0110496	0.362395
ENSG00000111696	2773.69	-0.486165	0.191235	-2.54224	0.0110146	0.362395
ENSG00000258725	11.0604	1.52898	0.601707	2.54106	0.0110516	0.362395
ENSG00000258647	19.5465	3.67849	1.44657	2.54291	0.0109934	0.362395
ENSG00000103056	120.226	1.28912	0.507147	2.5419	0.0110253	0.362395
ENSG00000136485	9770.1	0.243974	0.0959555	2.54257	0.011004	0.362395
ENSG00000110013	2862.53	-0.379372	0.14938	-2.53965	0.0110965	0.363438
ENSG00000267809	690.101	-0.376667	0.148369	-2.53871	0.0111262	0.363986
ENSG00000200834	10.4349	1.65898	0.653637	2.53807	0.0111466	0.364225
ENSG00000122585	4.32547	5.49668	2.16624	2.53743	0.011167	0.364468
ENSG00000284624	118.973	0.745554	0.293968	2.53618	0.011207	0.364494
ENSG00000224280	6.94208	-6.35578	2.50575	-2.53648	0.0111973	0.364494
ENSG00000252483	4.97955	3.57987	1.41144	2.53632	0.0112025	0.364494
ENSG00000204851	89.3906	1.03884	0.409902	2.53437	0.011265	0.365956
ENSG00000264016	61.2826	-0.863781	0.340952	-2.53344	0.0112948	0.366499
ENSG00000287022	11.0618	3.80178	1.50103	2.53278	0.011316	0.36676
ENSG00000137720	2728.32	-0.37599	0.148475	-2.53234	0.0113304	0.3668
ENSG00000273308	7.77353	2.8141	1.11224	2.53012	0.0114025	0.368708
ENSG00000176261	4606.31	-0.422547	0.167104	-2.52864	0.0114504	0.369298
ENSG00000170745	352.989	0.96693	0.382428	2.52839	0.0114585	0.369298
ENSG00000291125	5.97559	-4.29587	1.69912	-2.52829	0.0114619	0.369298
ENSG00000235447	316.958	1.22745	0.485553	2.52793	0.0114736	0.369298
ENSG00000116852	1033.29	0.546566	0.216256	2.5274	0.0114912	0.369437
ENSG00000110675	885.344	0.334163	0.132285	2.52608	0.0115343	0.36997
ENSG00000108231	4723.22	-0.373129	0.147709	-2.52611	0.0115334	0.36997
ENSG00000106689	81.3675	1.30745	0.5177	2.52551	0.0115532	0.370152
ENSG00000215861	45.2062	-0.704076	0.278851	-2.52492	0.0115725	0.370347
ENSG00000238269	6.84262	-3.69924	1.46565	-2.52397	0.0116039	0.370449
ENSG00000140025	253.423	-0.69652	0.275966	-2.52394	0.0116049	0.370449
ENSG00000266900	14.1982	-3.59757	1.42556	-2.52362	0.0116155	0.370449
ENSG00000289075	190.681	1.135	0.449855	2.52305	0.0116343	0.370627
ENSG00000164530	12.2849	5.01674	1.98919	2.522	0.0116691	0.37131
ENSG00000290902	152.949	-0.673199	0.267017	-2.52118	0.0116961	0.371324
ENSG00000257472	4.14856	5.4329	2.15466	2.52146	0.0116869	0.371324
ENSG00000147586	817.497	-0.407624	0.16172	-2.52056	0.0117168	0.371559
ENSG00000095739	118.905	-1.21708	0.483177	-2.5189	0.0117721	0.372467
ENSG00000101365	14645.8	-0.219655	0.0872012	-2.51895	0.0117706	0.372467
ENSG00000132906	823.358	-0.434203	0.172468	-2.51759	0.0118162	0.373316
ENSG00000216809	216.01	-0.664158	0.263837	-2.5173	0.0118256	0.373316
ENSG00000247199	1074.84	-0.443835	0.176361	-2.51663	0.0118483	0.373604
ENSG00000110848	12.1236	-7.15879	2.84549	-2.51584	0.0118749	0.373604
ENSG00000267312	12.7547	3.6068	1.43358	2.51595	0.0118713	0.373604
ENSG00000188266	309.233	-1.00229	0.39857	-2.51472	0.0119125	0.374368
ENSG00000286058	35.4887	1.86328	0.741663	2.51231	0.0119944	0.375767
ENSG00000153558	11261.4	-0.173994	0.06927	-2.51182	0.0120109	0.375767
ENSG00000244004	4.29515	5.48686	2.18435	2.51189	0.0120086	0.375767
ENSG00000189042	1976.82	-0.436971	0.173945	-2.51213	0.0120006	0.375767
ENSG00000143248	7110.61	-0.539292	0.214752	-2.51123	0.012031	0.375942
ENSG00000288822	4.11935	5.42345	2.15999	2.51087	0.0120434	0.375942
ENSG00000136527	13822.6	-0.156225	0.0622365	-2.51018	0.012067	0.376051
ENSG00000286976	14.9194	3.45934	1.37823	2.50998	0.0120738	0.376051
ENSG00000241359	11.8244	-1.89801	0.756665	-2.50839	0.0121284	0.377331
ENSG00000232693	18.4636	2.08635	0.832032	2.50754	0.0121575	0.377815
ENSG00000152910	409.423	0.690552	0.275519	2.50636	0.012198	0.378424
ENSG00000263272	408.85	0.658344	0.262688	2.50619	0.0122042	0.378424
ENSG00000111962	370.794	-0.852306	0.340327	-2.50437	0.0122668	0.379122
ENSG00000232053	4499.29	-0.394717	0.157572	-2.505	0.0122452	0.379122
ENSG00000261949	251.166	-0.671427	0.268124	-2.50417	0.0122739	0.379122
ENSG00000278611	574.77	-0.490577	0.19592	-2.50397	0.012281	0.379122
ENSG00000221955	82.0491	1.01899	0.407041	2.50342	0.0122999	0.379287
ENSG00000279255	3.95555	5.36692	2.14509	2.50196	0.0123508	0.380437
ENSG00000229639	4.06047	5.40113	2.16213	2.49806	0.0124874	0.381351
ENSG00000232626	20.2474	3.40591	1.3626	2.49957	0.0124345	0.381351
ENSG00000071073	3529.09	-0.224227	0.089758	-2.49813	0.012485	0.381351
ENSG00000181378	293.443	-0.6529	0.261127	-2.50032	0.0124082	0.381351
ENSG00000273045	409.852	0.386579	0.154671	2.49936	0.0124417	0.381351
ENSG00000119203	7009.19	-0.216427	0.0866275	-2.49836	0.0124768	0.381351
ENSG00000286299	24.2447	1.3288	0.531647	2.4994	0.0124405	0.381351
ENSG00000129194	124.261	-0.930449	0.372478	-2.498	0.0124897	0.381351
ENSG00000159208	224.187	0.917203	0.367595	2.49514	0.0125906	0.381929
ENSG00000144045	203.898	-0.747919	0.299659	-2.4959	0.0125637	0.381929
ENSG00000213123	854.444	-0.373561	0.14965	-2.49623	0.0125521	0.381929
ENSG00000006715	14429.4	-0.153187	0.0613669	-2.49625	0.0125515	0.381929
ENSG00000072121	260.123	0.746059	0.298833	2.49657	0.0125401	0.381929
ENSG00000140307	12642.9	-0.270431	0.108377	-2.49527	0.0125863	0.381929
ENSG00000230027	66.7378	1.40284	0.562597	2.49351	0.0126488	0.382448
ENSG00000111843	13982.5	-0.218545	0.0876214	-2.4942	0.0126242	0.382448
ENSG00000184574	14.3833	-3.76518	1.50982	-2.4938	0.0126385	0.382448
ENSG00000124787	2440.8	-0.442707	0.177579	-2.49301	0.0126664	0.382566
ENSG00000288988	94.9965	1.04629	0.420008	2.49113	0.0127337	0.383072
ENSG00000244701	7.79472	-2.76938	1.11153	-2.49151	0.01272	0.383072
ENSG00000164796	1418.21	0.624187	0.250576	2.49101	0.012738	0.383072
ENSG00000142530	1176.06	-0.493292	0.197968	-2.49178	0.0127104	0.383072
ENSG00000270055	14.5802	-2.51254	1.00882	-2.49057	0.0127539	0.383139
ENSG00000162733	50.0216	1.65972	0.666575	2.48993	0.0127769	0.383417
ENSG00000252274	3.57033	-5.39313	2.16742	-2.48827	0.0128365	0.384791
ENSG00000202184	5.96338	2.18668	0.879395	2.48657	0.012898	0.386119
ENSG00000156475	19486.9	-0.162415	0.0653345	-2.48591	0.0129222	0.386119
ENSG00000106080	685.987	-0.545245	0.219315	-2.48613	0.0129141	0.386119
ENSG00000185608	5842.3	-0.302045	0.121534	-2.48528	0.0129449	0.386383
ENSG00000081320	667.797	-0.762245	0.306807	-2.48445	0.0129753	0.386465
ENSG00000182158	146.538	0.982763	0.395518	2.48475	0.0129643	0.386465
ENSG00000179933	8481.28	-0.294058	0.118417	-2.48325	0.0130191	0.387355
ENSG00000184378	505.205	0.524279	0.211356	2.48055	0.0131181	0.389276
ENSG00000270207	104.968	-0.966683	0.389737	-2.48035	0.0131254	0.389276
ENSG00000182348	56.0198	2.42138	0.9762	2.48041	0.013123	0.389276
ENSG00000152894	511.699	0.871202	0.351305	2.4799	0.0131418	0.389348
ENSG00000139083	271.495	-0.511132	0.206308	-2.47752	0.0132301	0.391549
ENSG00000230002	10.9507	-4.05915	1.64003	-2.47504	0.0133221	0.39289
ENSG00000281501	268.703	-0.753056	0.304203	-2.4755	0.0133049	0.39289
ENSG00000198881	117.884	1.0607	0.428667	2.47441	0.0133457	0.39289
ENSG00000229613	3.83403	5.32403	2.15139	2.47469	0.0133352	0.39289
ENSG00000205352	4301.13	-0.278098	0.112322	-2.47591	0.0132896	0.39289
ENSG00000110375	130.994	-0.477978	0.193391	-2.47156	0.0134524	0.395614
ENSG00000173660	25944.2	-0.33523	0.135725	-2.46992	0.0135144	0.397018
ENSG00000135749	1817.03	0.427138	0.173374	2.46369	0.0137516	0.400283
ENSG00000004468	7.30994	6.25039	2.53429	2.46633	0.0136507	0.400283
ENSG00000287709	11.6183	-7.09655	2.88065	-2.46353	0.0137577	0.400283
ENSG00000015520	6.74145	6.13629	2.49015	2.46422	0.0137312	0.400283
ENSG00000005022	27612.9	-0.369343	0.149865	-2.4645	0.0137204	0.400283
ENSG00000150594	76.34	1.34228	0.544537	2.46499	0.0137015	0.400283
ENSG00000138336	4011.26	0.396348	0.160738	2.46579	0.013671	0.400283
ENSG00000226982	13.5943	-3.20036	1.29776	-2.46607	0.0136604	0.400283
ENSG00000198718	1926.1	0.452888	0.183739	2.46484	0.0137073	0.400283
ENSG00000128944	5358.24	-0.301776	0.122512	-2.46324	0.0137688	0.400283
ENSG00000145982	1858.25	-0.355692	0.144454	-2.46232	0.0138041	0.400894
ENSG00000287463	47.1178	1.3359	0.542762	2.46129	0.0138438	0.401306
ENSG00000228716	272.263	0.375933	0.152773	2.46073	0.0138654	0.401306
ENSG00000229282	6.69295	3.57745	1.45357	2.46115	0.0138494	0.401306
ENSG00000173068	779.466	0.760016	0.308892	2.46046	0.0138758	0.401306
ENSG00000287964	4.80365	4.64051	1.88644	2.45993	0.0138966	0.401492
ENSG00000166573	148.907	-1.4219	0.578337	-2.45861	0.0139477	0.402553
ENSG00000237433	11.7428	-5.35425	2.17846	-2.45781	0.0139786	0.402581
ENSG00000205981	9392.58	-0.245101	0.0997669	-2.45673	0.0140207	0.402581
ENSG00000118762	775.145	0.592202	0.241053	2.45673	0.0140207	0.402581
ENSG00000037280	5.73142	4.90017	1.99367	2.45786	0.0139767	0.402581
ENSG00000273015	6590.49	0.191901	0.0781056	2.45695	0.0140123	0.402581
ENSG00000101247	4784.03	-0.270118	0.109968	-2.45633	0.0140362	0.402612
ENSG00000240692	4.03106	5.39108	2.1955	2.45551	0.0140684	0.403122
ENSG00000183873	27.8486	-1.90997	0.778127	-2.45457	0.0141052	0.403762
ENSG00000060642	714.492	0.641694	0.26161	2.45286	0.0141724	0.40403
ENSG00000220694	12.8779	2.74877	1.12062	2.45291	0.0141707	0.40403
ENSG00000165731	2849.1	0.557559	0.227233	2.45369	0.0141399	0.40403
ENSG00000102445	80.9226	-1.55852	0.63534	-2.45305	0.014165	0.40403
ENSG00000198039	750.286	0.399977	0.163138	2.45177	0.0142157	0.404851
ENSG00000274667	3.81795	5.31531	2.16884	2.45076	0.0142556	0.405572
ENSG00000249006	5.90885	-6.12506	2.50149	-2.44857	0.0143425	0.40598
ENSG00000129625	35590	-0.110603	0.0451697	-2.4486	0.0143413	0.40598
ENSG00000164938	3697.11	0.4621	0.188718	2.44863	0.0143399	0.40598
ENSG00000265203	8.11178	3.83458	1.56563	2.44923	0.0143161	0.40598
ENSG00000111605	7061.49	0.261423	0.106707	2.44992	0.0142888	0.40598
ENSG00000197329	8080.3	-0.273019	0.111584	-2.44675	0.0144152	0.40721
ENSG00000165283	7601.36	-0.219872	0.0898581	-2.44687	0.0144101	0.40721
ENSG00000286513	3.88002	-5.51086	2.25416	-2.44474	0.0144955	0.408496
ENSG00000267452	192.82	-0.905023	0.370225	-2.44452	0.0145046	0.408496
ENSG00000210709	3.72007	-3.63595	1.48708	-2.44504	0.0144837	0.408496
ENSG00000265262	15.0149	2.02275	0.828025	2.44286	0.0145715	0.409855
ENSG00000269646	4.14797	5.43163	2.22371	2.44259	0.0145822	0.409855
ENSG00000239462	120.152	-0.641296	0.262796	-2.44028	0.014676	0.410845
ENSG00000134852	2567.89	0.374858	0.153559	2.44114	0.014641	0.410845
ENSG00000112234	1653.54	-0.268214	0.109912	-2.44027	0.0146762	0.410845
ENSG00000105792	163.073	0.816265	0.334476	2.44043	0.0146699	0.410845
ENSG00000115541	8537.79	-0.348877	0.143016	-2.43943	0.0147103	0.411389
ENSG00000269821	13804.8	0.627594	0.257485	2.4374	0.0147934	0.413297
ENSG00000229727	16.0178	-4.16445	1.7095	-2.43607	0.0148479	0.41358
ENSG00000103876	864.474	-0.564846	0.231857	-2.43618	0.0148434	0.41358
ENSG00000260247	3.98514	5.3752	2.20594	2.4367	0.014822	0.41358
ENSG00000260528	13.6331	-1.33217	0.547555	-2.43294	0.014977	0.416759
ENSG00000013619	252.298	1.30636	0.537077	2.43236	0.0150009	0.417011
ENSG00000127483	8619.08	0.309718	0.127504	2.42908	0.0151373	0.418304
ENSG00000169313	12.6977	4.50005	1.85205	2.42977	0.0151085	0.418304
ENSG00000134809	2951.53	-0.264111	0.10872	-2.42927	0.0151291	0.418304
ENSG00000224356	8.9962	-3.01309	1.24022	-2.42948	0.0151207	0.418304
ENSG00000264745	166.765	-0.584027	0.240289	-2.43052	0.015077	0.418304
ENSG00000196562	1687.78	0.357957	0.147307	2.43001	0.0150984	0.418304
ENSG00000180329	3877.31	-0.315245	0.129844	-2.42787	0.0151877	0.418869
ENSG00000267112	3.54668	5.20853	2.14508	2.42813	0.0151768	0.418869
ENSG00000163219	23.6667	-1.77691	0.733021	-2.42409	0.0153468	0.422839
ENSG00000279799	6.03362	3.61874	1.49376	2.42257	0.0154112	0.424194
ENSG00000225446	63.0691	-1.09378	0.451674	-2.42161	0.0154518	0.42474
ENSG00000162947	3.75933	4.25919	1.75899	2.42139	0.0154614	0.42474
ENSG00000228044	5.71678	-4.65828	1.92619	-2.41839	0.0155894	0.427417
ENSG00000132256	728.892	-0.522946	0.216212	-2.41867	0.0155773	0.427417
ENSG00000131475	13666.2	-0.293951	0.12158	-2.41776	0.0156165	0.427739
ENSG00000226454	7.4042	-2.23413	0.924217	-2.41732	0.0156351	0.42783
ENSG00000232995	99.3471	-0.86689	0.35869	-2.41683	0.0156565	0.427995
ENSG00000287460	16.3622	4.88487	2.02189	2.41598	0.0156927	0.428566
ENSG00000236848	9.57381	2.83017	1.17163	2.41558	0.0157102	0.428625
ENSG00000262294	32.8212	1.85494	0.768028	2.4152	0.0157264	0.428649
ENSG00000285280	99.2227	1.1341	0.470256	2.41167	0.0158798	0.431179
ENSG00000118246	9131.38	-0.230055	0.0953681	-2.41229	0.0158527	0.431179
ENSG00000137766	988.15	0.291421	0.120839	2.41164	0.015881	0.431179
ENSG00000125533	3.52574	5.19945	2.15518	2.41254	0.0158418	0.431179
ENSG00000240750	5.80941	2.5008	1.03731	2.41086	0.0159149	0.431681
ENSG00000260317	84.683	1.46866	0.609463	2.40976	0.015963	0.432412
ENSG00000286116	9.17662	3.18867	1.32335	2.40954	0.0159728	0.432412
ENSG00000086289	286.62	-0.893759	0.371024	-2.4089	0.0160008	0.432751
ENSG00000262921	19.0596	3.31034	1.37451	2.40838	0.0160237	0.43295
ENSG00000138639	594.336	-0.663559	0.275696	-2.40685	0.0160907	0.43392
ENSG00000103154	262.612	0.52909	0.2198	2.40715	0.0160777	0.43392
ENSG00000237816	3.89887	5.34825	2.22327	2.40558	0.0161468	0.434595
ENSG00000155714	96.673	0.965198	0.401174	2.40593	0.0161313	0.434595
ENSG00000152527	78.5631	2.65752	1.1053	2.40434	0.0162016	0.43467
ENSG00000242120	11.233	4.5449	1.89053	2.40403	0.0162153	0.43467
ENSG00000227939	31.1514	-0.812654	0.337978	-2.40446	0.0161965	0.43467
ENSG00000272047	7310.24	-0.250097	0.104044	-2.40376	0.0162274	0.43467
ENSG00000239672	7710.73	-0.225832	0.0939128	-2.4047	0.0161857	0.43467
ENSG00000107077	1515.41	0.650225	0.270607	2.40284	0.0162682	0.434928
ENSG00000185070	2809.36	0.651233	0.271003	2.40305	0.016259	0.434928
ENSG00000204311	489.873	-0.545031	0.227083	-2.40014	0.0163886	0.435141
ENSG00000150722	14555.8	-0.346782	0.144493	-2.4	0.0163952	0.435141
ENSG00000128050	7808.66	-0.253429	0.105623	-2.39936	0.0164236	0.435141
ENSG00000120733	1340.1	0.449013	0.186954	2.40173	0.0163176	0.435141
ENSG00000082293	102.383	1.10526	0.460665	2.39927	0.0164276	0.435141
ENSG00000091137	132.439	-1.54823	0.645224	-2.39952	0.0164165	0.435141
ENSG00000242559	3.6276	5.24259	2.18514	2.3992	0.0164307	0.435141
ENSG00000188647	2200.96	-0.295938	0.123306	-2.40004	0.0163934	0.435141
ENSG00000271614	1718.6	0.59278	0.246985	2.40006	0.0163923	0.435141
ENSG00000006062	26.9095	1.66998	0.696063	2.39918	0.0164319	0.435141
ENSG00000175984	184.5	-1.2367	0.515637	-2.39839	0.0164673	0.435667
ENSG00000138382	4736.19	-0.349847	0.145889	-2.39804	0.0164829	0.435668
ENSG00000263551	36.7759	-1.07871	0.44991	-2.39762	0.0165022	0.435764
ENSG00000180011	1345.21	0.435915	0.181851	2.3971	0.0165253	0.435962
ENSG00000102271	6506.16	-0.303305	0.126594	-2.39589	0.0165801	0.436672
ENSG00000254897	5.1499	-5.42579	2.2647	-2.39581	0.0165835	0.436672
ENSG00000245870	2886.62	-0.263758	0.110173	-2.39403	0.0166642	0.437077
ENSG00000250441	3.85074	5.32528	2.22486	2.39353	0.0166871	0.437077
ENSG00000183273	227.436	-1.01973	0.426058	-2.39341	0.0166927	0.437077
ENSG00000236028	128.822	-1.08595	0.453498	-2.39461	0.0166379	0.437077
ENSG00000171119	16.9474	1.86278	0.778052	2.39416	0.0166584	0.437077
ENSG00000159228	1566.22	-0.367401	0.153494	-2.39359	0.0166842	0.437077
ENSG00000139908	16.7545	-3.59494	1.50248	-2.39266	0.0167266	0.437145
ENSG00000231274	5.41464	-5.99872	2.50679	-2.39298	0.016712	0.437145
ENSG00000124313	42.1501	-1.19713	0.500452	-2.39211	0.016752	0.437399
ENSG00000185847	46.2763	-0.837904	0.350393	-2.39133	0.0167875	0.437916
ENSG00000164972	121.314	-0.640177	0.26777	-2.39078	0.0168129	0.438169
ENSG00000230054	3.32063	4.09038	1.71144	2.39002	0.0168474	0.43866
ENSG00000287025	15.1753	2.33052	0.975763	2.38841	0.0169214	0.438751
ENSG00000215218	1459.57	-0.360097	0.150749	-2.38872	0.0169071	0.438751
ENSG00000177733	4147.34	0.31912	0.133609	2.38846	0.0169192	0.438751
ENSG00000200091	10.5299	2.45401	1.02711	2.38924	0.0168832	0.438751
ENSG00000196636	4326.21	-0.351209	0.147058	-2.38824	0.0169294	0.438751
ENSG00000115956	50.2923	-3.38453	1.42111	-2.3816	0.0172375	0.43883
ENSG00000115446	5782.19	-0.213015	0.0894089	-2.38248	0.0171966	0.43883
ENSG00000109466	1290.05	-0.548261	0.229769	-2.38614	0.0170264	0.43883
ENSG00000138796	1510.09	-0.438369	0.183968	-2.38285	0.017179	0.43883
ENSG00000286310	13.1998	3.60541	1.51201	2.38452	0.0171016	0.43883
ENSG00000146021	1957.44	0.41048	0.17199	2.38665	0.0170025	0.43883
ENSG00000111885	238.689	0.694072	0.290733	2.38732	0.0169717	0.43883
ENSG00000220614	5.81628	4.02909	1.6876	2.38747	0.016965	0.43883
ENSG00000129680	314.819	-0.910647	0.381982	-2.38401	0.0171252	0.43883
ENSG00000223546	795.029	-0.599965	0.251881	-2.38194	0.0172218	0.43883
ENSG00000253697	3.58286	5.22365	2.19351	2.38141	0.0172466	0.43883
ENSG00000010626	432.664	0.704152	0.295303	2.38451	0.0171021	0.43883
ENSG00000139180	4371.37	-0.196941	0.0825914	-2.38452	0.0171012	0.43883
ENSG00000150457	269.019	0.546218	0.229317	2.38193	0.0172221	0.43883
ENSG00000159251	270.402	0.731503	0.3066	2.38586	0.0170395	0.43883
ENSG00000153976	208.596	-0.950855	0.398837	-2.38407	0.0171222	0.43883
ENSG00000170558	8642.68	0.20573	0.0862098	2.38639	0.0170146	0.43883
ENSG00000232645	112.124	-0.83378	0.350027	-2.38205	0.0172167	0.43883
ENSG00000179855	3.7781	5.30091	2.22453	2.38293	0.0171753	0.43883
ENSG00000237406	183.615	0.892818	0.374841	2.38186	0.0172256	0.43883
ENSG00000123219	641.182	-0.63811	0.268221	-2.37904	0.0173576	0.441252
ENSG00000171495	6.09143	5.49211	2.30999	2.37755	0.0174282	0.442646
ENSG00000105397	118.314	0.636064	0.267568	2.37721	0.0174444	0.442653
ENSG00000121964	1373.02	0.317188	0.133488	2.37616	0.0174939	0.443159
ENSG00000126856	6.44054	6.06991	2.55457	2.3761	0.0174968	0.443159
ENSG00000289255	68.4623	0.95966	0.403935	2.37578	0.0175119	0.443159
ENSG00000116679	17397.7	0.228866	0.0963963	2.37422	0.0175862	0.443432
ENSG00000289534	125.471	0.916559	0.385892	2.37517	0.0175409	0.443432
ENSG00000053108	197.345	0.719116	0.302834	2.37463	0.0175667	0.443432
ENSG00000173114	13366.3	0.290583	0.122388	2.37428	0.0175834	0.443432
ENSG00000145526	6107.8	0.350046	0.147478	2.37355	0.0176181	0.443837
ENSG00000236519	65.0944	-1.15252	0.486014	-2.37138	0.017722	0.446052
ENSG00000007968	5.90195	-6.11723	2.58053	-2.37053	0.0177626	0.446671
ENSG00000289385	3.60822	5.23098	2.20757	2.36956	0.0178093	0.447137
ENSG00000204520	43.3565	1.95206	0.823833	2.36948	0.0178131	0.447137
ENSG00000147437	63.9829	0.758385	0.320252	2.36809	0.0178802	0.447613
ENSG00000257261	585.707	-0.387627	0.163682	-2.36817	0.0178765	0.447613
ENSG00000087495	14081	-0.287278	0.121283	-2.36865	0.017853	0.447613
ENSG00000210196	3135.71	-0.489726	0.206843	-2.36763	0.0179025	0.447772
ENSG00000232439	13.3308	-1.44204	0.609359	-2.36648	0.0179581	0.44876
ENSG00000290937	21.9242	-1.59357	0.67353	-2.36599	0.0179817	0.448949
ENSG00000203805	319.156	-0.478469	0.202289	-2.36528	0.0180164	0.449412
ENSG00000273084	261.416	0.291078	0.123198	2.36268	0.0181431	0.451028
ENSG00000234323	86.7718	1.44	0.609512	2.36254	0.0181503	0.451028
ENSG00000187122	356.617	0.668812	0.282977	2.36349	0.0181039	0.451028
ENSG00000205696	24.7595	1.60483	0.679524	2.36169	0.0181916	0.451028
ENSG00000257761	5.92511	5.94833	2.51827	2.36207	0.0181734	0.451028
ENSG00000136161	2006.28	0.260115	0.110141	2.36164	0.0181942	0.451028
ENSG00000259083	20.3978	1.22629	0.519033	2.36265	0.0181449	0.451028
ENSG00000117643	142.591	1.00816	0.427158	2.36016	0.0182671	0.451725
ENSG00000198734	25.8723	1.93542	0.819932	2.36046	0.0182521	0.451725
ENSG00000183718	1087.38	-0.371619	0.15746	-2.36008	0.0182708	0.451725
ENSG00000283097	6.95252	6.17846	2.62023	2.35799	0.0183744	0.453885
ENSG00000162614	237.61	0.975619	0.414095	2.35603	0.0184715	0.454675
ENSG00000204923	549.777	-0.424937	0.180338	-2.35634	0.0184562	0.454675
ENSG00000290926	160.927	-0.545543	0.231464	-2.35692	0.0184272	0.454675
ENSG00000140995	5736.68	-0.359492	0.152547	-2.3566	0.0184429	0.454675
ENSG00000091436	121.643	-0.952395	0.404743	-2.35308	0.0186184	0.454824
ENSG00000171951	62804.6	-0.158229	0.0672368	-2.35331	0.018607	0.454824
ENSG00000284862	28.6051	1.50932	0.641582	2.3525	0.0186475	0.454824
ENSG00000250543	10.2766	4.40974	1.87283	2.35459	0.0185433	0.454824
ENSG00000287258	169.138	1.03029	0.438002	2.35224	0.0186606	0.454824
ENSG00000166741	58.6995	1.43947	0.611922	2.35237	0.0186543	0.454824
ENSG00000162222	2583.87	-0.236644	0.100627	-2.35169	0.0186884	0.454824
ENSG00000258375	5.43145	4.81371	2.04582	2.35295	0.0186253	0.454824
ENSG00000057294	352.551	0.602019	0.255762	2.35382	0.0185814	0.454824
ENSG00000260316	7.66723	3.91447	1.66299	2.35387	0.018579	0.454824
ENSG00000288026	5.87507	-6.11248	2.59921	-2.35167	0.0186892	0.454824
ENSG00000265801	15.2764	1.90131	0.807799	2.3537	0.0185879	0.454824
ENSG00000183668	6.95573	-5.35999	2.27881	-2.3521	0.0186676	0.454824
ENSG00000124406	11945.2	0.230829	0.0982204	2.35011	0.0187677	0.45602
ENSG00000260779	11.2439	-6.06772	2.58196	-2.35005	0.018771	0.45602
ENSG00000166415	223.882	0.696151	0.29642	2.34853	0.0188478	0.457489
ENSG00000286732	14.1122	-3.35434	1.42858	-2.34802	0.0188735	0.457714
ENSG00000148488	14.6601	-5.37534	2.28979	-2.34753	0.0188985	0.457923
ENSG00000144668	352.041	-0.58159	0.247888	-2.34618	0.0189671	0.459188
ENSG00000242598	32.2342	1.02819	0.43843	2.34516	0.0190191	0.459712
ENSG00000144591	1322.93	-0.496917	0.211924	-2.34478	0.0190381	0.459712
ENSG00000261342	29.3729	-0.903788	0.385444	-2.3448	0.0190374	0.459712
ENSG00000157978	15.1209	-5.07735	2.16672	-2.34334	0.0191122	0.460299
ENSG00000278480	3.60605	5.23123	2.23299	2.3427	0.0191446	0.460299
ENSG00000286081	7.85667	4.48968	1.91672	2.34238	0.0191613	0.460299
ENSG00000175073	3365.45	-0.338796	0.144559	-2.34365	0.019096	0.460299
ENSG00000103528	1257.26	0.249137	0.106361	2.34238	0.0191611	0.460299
ENSG00000203971	17.4801	2.15801	0.920947	2.34325	0.0191164	0.460299
ENSG00000214194	8630.28	-0.199769	0.085309	-2.34171	0.0191956	0.460419
ENSG00000175535	5.83632	5.92638	2.53087	2.34164	0.0191992	0.460419
ENSG00000262881	4.78341	1.92622	0.822757	2.34118	0.0192229	0.460592
ENSG00000236833	5.0498	3.91122	1.67243	2.33864	0.0193541	0.46173
ENSG00000185477	2800.03	0.351776	0.150381	2.33924	0.0193229	0.46173
ENSG00000153956	5226.6	-0.396084	0.169387	-2.33834	0.0193695	0.46173
ENSG00000170323	17.97	-2.02317	0.865019	-2.33887	0.0193419	0.46173
ENSG00000099284	6410.72	0.441516	0.188816	2.33834	0.0193696	0.46173
ENSG00000259921	5.33448	4.21276	1.80104	2.33906	0.0193321	0.46173
ENSG00000285921	27.8023	1.6587	0.709445	2.33802	0.0193862	0.461733
ENSG00000255327	5.51704	-6.02094	2.57679	-2.33661	0.0194596	0.463086
ENSG00000266472	24413.6	-0.34581	0.148047	-2.33581	0.0195012	0.463681
ENSG00000110436	2277.12	0.357195	0.152944	2.33547	0.0195191	0.46371
ENSG00000117676	215.599	1.11323	0.47693	2.33415	0.0195876	0.464944
ENSG00000162981	2391.75	0.729186	0.312513	2.3333	0.0196324	0.465612
ENSG00000168569	1820.03	-0.311258	0.133436	-2.33265	0.0196668	0.46603
ENSG00000287074	13.5757	3.87774	1.66262	2.33231	0.0196846	0.466058
ENSG00000007001	14.1623	2.74468	1.17746	2.33102	0.0197524	0.466476
ENSG00000106462	1158.99	0.446848	0.191682	2.3312	0.0197427	0.466476
ENSG00000122548	22.6349	2.33844	1.00309	2.33124	0.0197409	0.466476
ENSG00000164743	969.406	-0.492709	0.211508	-2.32951	0.0198321	0.467964
ENSG00000235510	11.0536	-2.43726	1.04659	-2.32876	0.0198719	0.468508
ENSG00000214595	469.143	-0.462903	0.198876	-2.32759	0.0199339	0.468994
ENSG00000250421	21.2874	-2.26555	0.97355	-2.3271	0.0199597	0.468994
ENSG00000134900	3886.81	-0.213139	0.091587	-2.32718	0.0199557	0.468994
ENSG00000247287	6.05043	5.98034	2.5697	2.32725	0.0199519	0.468994
ENSG00000234318	4.21253	4.44901	1.91283	2.32588	0.0200247	0.469483
ENSG00000162385	2175.46	-0.324623	0.139603	-2.32534	0.0200539	0.469483
ENSG00000112309	2892.71	0.346915	0.149209	2.32502	0.0200706	0.469483
ENSG00000106328	5.94115	5.95246	2.56014	2.32505	0.0200693	0.469483
ENSG00000167195	4.09873	-3.54248	1.52376	-2.32482	0.0200813	0.469483
ENSG00000287961	6.09382	3.0114	1.29485	2.32567	0.0200363	0.469483
ENSG00000225498	3.61057	5.23326	2.25145	2.32439	0.0201046	0.469635
ENSG00000142875	57279	0.190486	0.0819795	2.32358	0.020148	0.470255
ENSG00000273486	226.614	0.579149	0.249349	2.32264	0.0201983	0.471036
ENSG00000270231	464.623	-0.529263	0.228001	-2.32132	0.0202696	0.472304
ENSG00000167157	4.70354	4.59083	1.97836	2.32052	0.0203125	0.472472
ENSG00000042317	2932.29	-0.351425	0.15146	-2.32025	0.0203276	0.472472
ENSG00000179981	269.018	0.671876	0.28957	2.32026	0.0203271	0.472472
ENSG00000242697	14.504	-1.40744	0.60702	-2.31861	0.0204162	0.474138
ENSG00000177508	217.199	0.858557	0.37055	2.31698	0.0205048	0.475799
ENSG00000143171	2507.62	0.49124	0.212068	2.31643	0.020535	0.476106
ENSG00000167355	6.4151	-4.73686	2.04606	-2.31512	0.0206065	0.477366
ENSG00000226868	5.0992	-2.51161	1.08529	-2.31423	0.020655	0.478094
ENSG00000256064	9.96168	2.73612	1.18288	2.31309	0.0207175	0.479143
ENSG00000264920	1864.99	-0.30389	0.131398	-2.31274	0.0207369	0.479196
ENSG00000119013	17970.3	-0.381047	0.164825	-2.31183	0.0207872	0.479962
ENSG00000149485	16188.7	0.239926	0.103835	2.31064	0.0208527	0.481075
ENSG00000204381	253.935	-0.779516	0.337575	-2.30916	0.0209346	0.482567
ENSG00000170500	1811.85	0.305764	0.132436	2.30876	0.0209568	0.48268
ENSG00000069702	18.0631	-3.30124	1.43281	-2.30403	0.0212207	0.483406
ENSG00000286429	24.4747	2.3186	1.00502	2.30702	0.0210537	0.483406
ENSG00000128694	2260.54	-0.238103	0.103295	-2.30507	0.0211626	0.483406
ENSG00000230612	42.428	1.20091	0.52044	2.30748	0.0210279	0.483406
ENSG00000113649	8965.82	0.243363	0.105524	2.30623	0.0210978	0.483406
ENSG00000231244	48.7634	-1.26447	0.548938	-2.30349	0.0212512	0.483406
ENSG00000178445	142.093	1.26323	0.547716	2.30636	0.0210906	0.483406
ENSG00000253973	16.9136	2.92733	1.27023	2.30456	0.0211914	0.483406
ENSG00000230869	5.39022	-2.70237	1.17198	-2.3058	0.0211217	0.483406
ENSG00000153233	4981.41	-0.319177	0.138561	-2.30351	0.0212502	0.483406
ENSG00000204954	5332.66	-0.214693	0.0932132	-2.30324	0.0212651	0.483406
ENSG00000111229	15102.1	-0.149939	0.0649841	-2.30732	0.0210367	0.483406
ENSG00000213145	24.3233	-1.45918	0.633424	-2.30363	0.0212433	0.483406
ENSG00000261216	3.65257	5.24833	2.2786	2.30331	0.0212616	0.483406
ENSG00000232528	61.9393	-1.13275	0.491312	-2.30555	0.0211356	0.483406
ENSG00000149658	965.899	0.326273	0.141472	2.30627	0.0210957	0.483406
ENSG00000171055	2310.43	-0.431943	0.187704	-2.30119	0.0213809	0.485641
ENSG00000200235	3.3604	5.12788	2.22906	2.30047	0.0214215	0.486169
ENSG00000088766	34.8047	0.781109	0.339589	2.30016	0.0214393	0.486179
ENSG00000135835	4.16842	2.33365	1.01493	2.29931	0.0214873	0.486476
ENSG00000128394	647.323	-0.61413	0.267084	-2.29939	0.0214826	0.486476
ENSG00000161980	2679.12	-0.315661	0.13731	-2.2989	0.0215109	0.486616
ENSG00000160229	610.825	0.43712	0.190185	2.29839	0.0215397	0.486873
ENSG00000158869	17.3289	-1.6996	0.739867	-2.29717	0.0216091	0.487047
ENSG00000196126	2082.9	-0.343863	0.149667	-2.29751	0.0215895	0.487047
ENSG00000079459	59188.8	0.169298	0.0736893	2.29746	0.0215926	0.487047
ENSG00000118900	355.596	0.656108	0.285633	2.29703	0.0216171	0.487047
ENSG00000112299	9.42651	-6.79459	2.95967	-2.29573	0.0216915	0.488
ENSG00000011201	153.402	1.58698	0.691292	2.29568	0.0216943	0.488
ENSG00000272148	96.7524	-0.676908	0.294903	-2.29535	0.0217128	0.488023
ENSG00000182095	92.8411	0.894588	0.390071	2.2934	0.021825	0.489364
ENSG00000266357	3.82762	-4.48819	1.9568	-2.29364	0.0218113	0.489364
ENSG00000291087	1768.72	-0.278553	0.121431	-2.29392	0.021795	0.489364
ENSG00000289960	18.8952	-1.70797	0.745273	-2.29173	0.021921	0.491121
ENSG00000129048	6.6996	2.49566	1.09023	2.28912	0.0220722	0.492535
ENSG00000197385	268.875	-0.780406	0.340809	-2.28986	0.0220293	0.492535
ENSG00000272008	255.559	0.508378	0.222021	2.28977	0.0220344	0.492535
ENSG00000156802	551.725	-0.589477	0.257508	-2.28916	0.0220699	0.492535
ENSG00000256659	4.96867	-5.87121	2.56483	-2.28912	0.0220722	0.492535
ENSG00000134058	4911.67	-0.369994	0.161715	-2.28794	0.0221412	0.492844
ENSG00000233642	18.3079	2.31484	1.01167	2.28813	0.0221302	0.492844
ENSG00000225362	23.4627	2.41546	1.056	2.28737	0.0221743	0.492844
ENSG00000083845	25999.1	-0.22984	0.100473	-2.28758	0.022162	0.492844
ENSG00000154721	774.209	0.400858	0.175227	2.28765	0.0221579	0.492844
ENSG00000231346	5.38205	5.81174	2.54212	2.28618	0.0222439	0.493032
ENSG00000131375	4322.08	0.238656	0.104398	2.28602	0.0222533	0.493032
ENSG00000291168	64.5677	0.738263	0.322941	2.28606	0.0222507	0.493032
ENSG00000288047	6.12979	5.99619	2.62212	2.28677	0.0222092	0.493032
ENSG00000164742	2086.23	0.380813	0.166607	2.2857	0.0222716	0.493045
ENSG00000120509	14441	-0.338441	0.148106	-2.28512	0.0223057	0.49326
ENSG00000136930	25219.3	-0.261812	0.114582	-2.28494	0.0223166	0.49326
ENSG00000116147	470.928	0.706428	0.309339	2.28367	0.022391	0.494465
ENSG00000288040	5.84484	5.92784	2.59605	2.28341	0.0224065	0.494465
ENSG00000197245	17.0279	2.27904	0.998286	2.28295	0.0224332	0.494547
ENSG00000167792	17893.2	-0.166269	0.0728376	-2.28274	0.0224456	0.494547
ENSG00000124383	11508.7	-0.290558	0.127304	-2.2824	0.0224659	0.494603
ENSG00000251720	41.6545	-1.01735	0.445887	-2.28162	0.0225117	0.495222
ENSG00000180817	18086.9	-0.221737	0.097206	-2.2811	0.0225422	0.495504
ENSG00000111716	4700.85	-0.221693	0.0972346	-2.27998	0.0226086	0.496572
ENSG00000163827	29.7096	-2.09883	0.920701	-2.2796	0.0226314	0.496683
ENSG00000115966	17979.4	-0.196978	0.0864329	-2.27897	0.0226686	0.496689
ENSG00000227227	173.912	0.570539	0.250387	2.27862	0.0226894	0.496689
ENSG00000134108	13645.6	-0.178428	0.0783232	-2.2781	0.0227206	0.496689
ENSG00000148120	696.638	-0.38754	0.170102	-2.27829	0.0227095	0.496689
ENSG00000235698	6.57137	3.0888	1.35582	2.27819	0.0227153	0.496689
ENSG00000142599	1287.5	0.397299	0.17444	2.27757	0.0227522	0.49699
ENSG00000164934	9424.9	-0.302911	0.133037	-2.2769	0.0227922	0.497475
ENSG00000189171	1323.87	-0.345173	0.151649	-2.27613	0.0228385	0.497709
ENSG00000051596	3835.03	-0.213718	0.0938912	-2.27624	0.0228318	0.497709
ENSG00000231789	461.165	-0.43875	0.192819	-2.27545	0.0228791	0.498204
ENSG00000120860	9146.84	-0.263708	0.115939	-2.27453	0.0229339	0.499008
ENSG00000106268	442.98	-0.455662	0.200395	-2.27382	0.0229771	0.499559
ENSG00000231762	59.9488	-1.27084	0.559113	-2.27296	0.0230286	0.50029
ENSG00000117594	5.67895	5.88743	2.59296	2.27055	0.0231745	0.501898
ENSG00000240429	36.0636	-1.54237	0.679141	-2.27107	0.023143	0.501898
ENSG00000119471	1524.11	-0.440046	0.193732	-2.27142	0.0231218	0.501898
ENSG00000267058	497.827	-0.31239	0.137568	-2.27081	0.0231584	0.501898
ENSG00000131409	69.9471	0.808231	0.356201	2.26903	0.0232664	0.503498
ENSG00000163812	1441.69	0.462058	0.203677	2.26858	0.0232936	0.503697
ENSG00000177614	864.569	0.535083	0.23598	2.26749	0.02336	0.504154
ENSG00000163170	2305.69	-0.3224	0.142185	-2.26747	0.0233614	0.504154
ENSG00000228659	467.267	-0.399189	0.17606	-2.26735	0.0233689	0.504154
ENSG00000270171	32.2318	2.74597	1.21183	2.26597	0.023453	0.504298
ENSG00000233184	1136.27	-0.33086	0.146027	-2.26574	0.0234671	0.504298
ENSG00000138760	13373.7	0.209705	0.0925409	2.26607	0.0234468	0.504298
ENSG00000188343	3763.99	-0.238796	0.105354	-2.2666	0.0234149	0.504298
ENSG00000177335	117.688	-1.20377	0.531146	-2.26636	0.0234294	0.504298
ENSG00000282851	3.40897	4.11562	1.81668	2.26547	0.0234838	0.504298
ENSG00000197299	1138.21	-0.527412	0.232841	-2.26512	0.0235053	0.504372
ENSG00000168263	6.58476	4.32744	1.9111	2.26438	0.0235509	0.504963
ENSG00000175264	158.265	0.801858	0.354201	2.26385	0.0235835	0.505272
ENSG00000196542	877.009	-0.521599	0.23054	-2.26251	0.0236658	0.5053
ENSG00000204961	835.681	0.646992	0.285926	2.26279	0.0236485	0.5053
ENSG00000204420	9.36484	2.57711	1.13912	2.26236	0.0236752	0.5053
ENSG00000258599	5.93122	3.55249	1.56994	2.26282	0.0236468	0.5053
ENSG00000263727	4.45788	4.52863	2.00071	2.26351	0.0236041	0.5053
ENSG00000113302	5.50691	5.84486	2.5876	2.2588	0.023896	0.508335
ENSG00000146276	2091.69	0.388419	0.17197	2.25864	0.0239055	0.508335
ENSG00000137642	1087.93	0.414154	0.183355	2.25875	0.0238988	0.508335
ENSG00000100483	1656.4	-0.297855	0.131814	-2.25965	0.0238427	0.508335
ENSG00000183496	298	0.675546	0.299099	2.2586	0.0239084	0.508335
ENSG00000249509	7.59574	3.52258	1.56014	2.25786	0.0239545	0.508729
ENSG00000204264	77.8007	-1.13165	0.50125	-2.25765	0.0239677	0.508729
ENSG00000099194	21169.6	0.56525	0.250428	2.25713	0.0239998	0.508729
ENSG00000269097	9.49383	2.64963	1.17384	2.25723	0.0239937	0.508729
ENSG00000101542	57.7424	-1.17858	0.522268	-2.25665	0.0240301	0.508986
ENSG00000215869	6.36258	-5.22347	2.31722	-2.2542	0.0241838	0.5107
ENSG00000249173	5.29265	-5.96048	2.64452	-2.2539	0.0242024	0.5107
ENSG00000184905	6464.72	0.27943	0.12396	2.2542	0.0241837	0.5107
ENSG00000198964	1263	-0.412152	0.182814	-2.25449	0.0241654	0.5107
ENSG00000130254	2185.85	0.333257	0.14785	2.25402	0.024195	0.5107
ENSG00000287076	9.87498	3.16977	1.40751	2.25204	0.0243199	0.51183
ENSG00000049883	4096.35	-0.44876	0.199299	-2.25169	0.0243416	0.51183
ENSG00000184863	762.751	0.492619	0.21871	2.25239	0.0242979	0.51183
ENSG00000201324	3.47055	5.17442	2.29811	2.2516	0.0243475	0.51183
ENSG00000265142	190.437	0.932042	0.413894	2.25189	0.0243294	0.51183
ENSG00000250033	27.2173	2.29387	1.01907	2.25094	0.0243896	0.512328
ENSG00000288574	25.047	1.68323	0.748504	2.24879	0.0245261	0.513978
ENSG00000290867	72.7771	0.655463	0.291476	2.24877	0.0245272	0.513978
ENSG00000287340	915.761	0.42897	0.190729	2.24911	0.0245053	0.513978
ENSG00000286975	9.24834	3.94501	1.75448	2.24854	0.0245417	0.513978
ENSG00000262503	41.3439	-1.4036	0.624475	-2.24765	0.0245986	0.514782
ENSG00000228549	7.95512	-2.7388	1.2192	-2.2464	0.0246784	0.514803
ENSG00000268043	470.506	0.448561	0.199628	2.24699	0.0246408	0.514803
ENSG00000290993	371.276	0.406917	0.181162	2.24615	0.0246946	0.514803
ENSG00000145632	25040.8	-0.225954	0.100646	-2.24504	0.0247654	0.514803
ENSG00000203321	10.6457	-1.43769	0.640229	-2.24559	0.0247304	0.514803
ENSG00000234504	5.32079	5.79259	2.5793	2.2458	0.0247167	0.514803
ENSG00000119632	8789	-0.306578	0.136545	-2.24525	0.0247519	0.514803
ENSG00000258813	71.7376	-0.930455	0.414411	-2.24525	0.0247524	0.514803
ENSG00000182853	272.687	-0.54336	0.241842	-2.24676	0.0246553	0.514803
ENSG00000134539	11.968	3.23246	1.44001	2.24474	0.0247847	0.514822
ENSG00000224219	16.3796	1.97018	0.878529	2.24259	0.0249231	0.51523
ENSG00000144837	23.2285	-3.79694	1.69204	-2.244	0.0248324	0.51523
ENSG00000241560	153.61	1.10449	0.492465	2.24278	0.0249109	0.51523
ENSG00000204140	3.32785	5.11704	2.28192	2.24243	0.0249335	0.51523
ENSG00000207595	8.45161	2.12935	0.949232	2.24323	0.0248817	0.51523
ENSG00000254441	3.4625	5.17206	2.3052	2.24365	0.0248551	0.51523
ENSG00000165966	4124.72	0.311457	0.138875	2.24271	0.0249153	0.51523
ENSG00000218233	22.1274	-1.48206	0.661196	-2.24148	0.024995	0.515788
ENSG00000136044	1944.01	0.329323	0.146936	2.24128	0.0250081	0.515788
ENSG00000171295	776.459	0.535833	0.239087	2.24116	0.0250158	0.515788
ENSG00000291082	313.118	0.470085	0.20981	2.24052	0.025057	0.516256
ENSG00000224183	3.65454	3.00792	1.34289	2.23989	0.0250981	0.516341
ENSG00000148384	159.737	0.858187	0.383119	2.24	0.025091	0.516341
ENSG00000109118	479.16	0.825753	0.368722	2.2395	0.0251233	0.516479
ENSG00000237973	524.59	-0.29314	0.130994	-2.23782	0.0252328	0.517308
ENSG00000115977	2067.79	0.350755	0.156759	2.23754	0.0252512	0.517308
ENSG00000132570	1393.91	-0.517737	0.231395	-2.23746	0.0252562	0.517308
ENSG00000111886	18.7504	3.28986	1.47004	2.23794	0.0252247	0.517308
ENSG00000226521	6.69043	2.97715	1.33001	2.23845	0.0251918	0.517308
ENSG00000241261	27.1625	1.24424	0.556219	2.23696	0.0252886	0.51741
ENSG00000100191	72.9853	0.758082	0.338911	2.23682	0.0252982	0.51741
ENSG00000197818	95.8924	1.52997	0.684322	2.23575	0.0253681	0.518458
ENSG00000225263	97.3117	1.14659	0.512952	2.23527	0.0253994	0.51872
ENSG00000180155	81.8245	-0.911385	0.407783	-2.23497	0.0254191	0.518743
ENSG00000288596	958.173	-0.411531	0.184184	-2.23435	0.02546	0.519199
ENSG00000226367	110.266	0.704589	0.315394	2.23399	0.0254835	0.519298
ENSG00000285967	2118.48	0.205753	0.092119	2.23355	0.0255124	0.519508
ENSG00000164111	7705.05	-0.270615	0.121218	-2.23246	0.0255843	0.520594
ENSG00000101846	1414.01	-0.436441	0.195581	-2.2315	0.0256477	0.521206
ENSG00000100276	27.7229	-2.37386	1.06382	-2.23144	0.0256517	0.521206
ENSG00000288597	49.4182	0.797479	0.357552	2.23038	0.025722	0.521605
ENSG00000123575	2050.48	0.304532	0.136543	2.2303	0.0257274	0.521605
ENSG00000237766	20.7602	2.74671	1.23138	2.2306	0.0257078	0.521605
ENSG00000287834	5.32716	5.7968	2.59955	2.22992	0.0257525	0.521735
ENSG00000144395	172.133	-0.96889	0.43457	-2.22954	0.0257782	0.521877
ENSG00000132773	545.264	-0.408597	0.183324	-2.22883	0.0258255	0.522293
ENSG00000274584	8.53159	-1.61303	0.723855	-2.22839	0.0258548	0.522293
ENSG00000198911	1455.96	0.357966	0.160621	2.22863	0.0258382	0.522293
ENSG00000054282	6647.32	-0.283033	0.12704	-2.22791	0.0258866	0.522557
ENSG00000214026	136.17	-0.373369	0.167672	-2.22679	0.0259614	0.523689
ENSG00000131143	44561.1	-0.217117	0.0975523	-2.22564	0.026038	0.524855
ENSG00000136444	334.846	0.9367	0.421036	2.22475	0.026098	0.525221
ENSG00000197971	2954.72	0.308358	0.138617	2.22453	0.0261126	0.525221
ENSG00000101608	8532.69	-0.25976	0.116768	-2.22459	0.026109	0.525221
ENSG00000230937	10.2999	2.32623	1.04605	2.22382	0.0261608	0.525435
ENSG00000259380	4.28932	4.45959	2.0052	2.22401	0.0261475	0.525435
ENSG00000213139	82.2021	-0.95762	0.43068	-2.22351	0.0261816	0.525476
ENSG00000286391	586.585	-0.34048	0.153153	-2.22313	0.0262069	0.525604
ENSG00000182827	2933.92	-0.528722	0.23791	-2.22236	0.0262588	0.525891
ENSG00000174038	5.64819	5.8788	2.64521	2.22244	0.0262539	0.525891
ENSG00000224982	237.423	-0.522958	0.235358	-2.22197	0.0262852	0.526043
ENSG00000267577	14.5825	-2.04947	0.922918	-2.22064	0.0263753	0.527468
ENSG00000131100	23170	-0.210757	0.0949297	-2.22014	0.0264092	0.527768
ENSG00000242485	6783.9	-0.218869	0.0986096	-2.21955	0.0264494	0.528194
ENSG00000280355	77.557	0.646446	0.291402	2.2184	0.0265275	0.529375
ENSG00000252947	8.27977	2.05763	0.928428	2.21626	0.026674	0.530121
ENSG00000136521	10390.8	-0.202876	0.0915422	-2.2162	0.0266777	0.530121
ENSG00000144834	36192	0.191385	0.0863347	2.21678	0.0266384	0.530121
ENSG00000255389	1165.43	0.314129	0.141741	2.21623	0.026676	0.530121
ENSG00000253888	9.8179	3.16782	1.4294	2.21619	0.0266787	0.530121
ENSG00000289592	127.258	-0.840972	0.379338	-2.21694	0.0266269	0.530121
ENSG00000136560	8671.65	-0.25031	0.11301	-2.21494	0.026764	0.531438
ENSG00000235251	9.54275	-5.82077	2.62944	-2.21369	0.02685	0.531635
ENSG00000168393	3403.37	-0.206298	0.0931603	-2.21444	0.0267983	0.531635
ENSG00000102804	31248.3	0.123736	0.0558939	2.21376	0.0268451	0.531635
ENSG00000150281	12.257	-2.85423	1.28907	-2.21417	0.0268168	0.531635
ENSG00000176635	12.7398	-3.71931	1.68119	-2.21231	0.0269451	0.53314
ENSG00000254726	2593.73	0.195185	0.0882745	2.21112	0.0270278	0.533142
ENSG00000248461	30.2141	-1.39877	0.632381	-2.21191	0.026973	0.533142
ENSG00000151474	1908.18	-0.323004	0.146086	-2.21105	0.0270323	0.533142
ENSG00000237637	168.978	0.735431	0.332587	2.21124	0.0270191	0.533142
ENSG00000236581	16.6472	3.29263	1.48925	2.21093	0.0270407	0.533142
ENSG00000162722	41.9291	-2.17726	0.986685	-2.20664	0.0273389	0.533457
ENSG00000243659	34.5079	1.1468	0.519096	2.20922	0.0271591	0.533457
ENSG00000204084	236.601	0.807481	0.365505	2.20922	0.0271593	0.533457
ENSG00000048991	6367.09	0.271638	0.122967	2.20903	0.0271725	0.533457
ENSG00000200350	3.32032	2.6013	1.1774	2.20936	0.0271498	0.533457
ENSG00000155868	4072.34	-0.424185	0.191904	-2.2104	0.0270774	0.533457
ENSG00000179165	7.03918	3.554	1.60847	2.20955	0.0271367	0.533457
ENSG00000106554	7479.75	-0.108285	0.0490815	-2.20623	0.0273676	0.533457
ENSG00000230312	5.96252	4.05134	1.83573	2.20693	0.0273187	0.533457
ENSG00000147669	18541.5	-0.366488	0.16615	-2.20577	0.0274003	0.533457
ENSG00000090054	7096.02	-0.258513	0.117105	-2.20753	0.0272771	0.533457
ENSG00000119514	28.9801	-1.56427	0.709116	-2.20594	0.0273884	0.533457
ENSG00000150687	754.093	0.630071	0.28552	2.20675	0.0273319	0.533457
ENSG00000183049	764.603	0.455778	0.206463	2.20755	0.0272754	0.533457
ENSG00000227540	447.833	-0.341727	0.154722	-2.20865	0.027199	0.533457
ENSG00000151240	1075.57	-0.424935	0.192647	-2.20577	0.0273998	0.533457
ENSG00000118898	231.81	1.03042	0.466941	2.20674	0.0273325	0.533457
ENSG00000167863	12799.3	-0.327238	0.148182	-2.20836	0.0272194	0.533457
ENSG00000173401	65.9242	0.884369	0.401017	2.20532	0.0274319	0.533699
ENSG00000256849	11.6121	-1.88815	0.856406	-2.20473	0.0274727	0.534121
ENSG00000171530	11361.9	-0.158749	0.0720263	-2.20405	0.027521	0.534688
ENSG00000233928	34.1605	-3.54192	1.60743	-2.20347	0.0275615	0.535103
ENSG00000285750	25.5896	-2.85877	1.298	-2.20244	0.0276343	0.535772
ENSG00000156642	1582.71	0.296476	0.134597	2.20269	0.0276167	0.535772
ENSG00000137364	2886.48	-0.335851	0.152531	-2.20186	0.0276754	0.536197
ENSG00000257294	4.60285	-5.75982	2.6168	-2.20109	0.0277297	0.536876
ENSG00000160049	6593.66	-0.152282	0.0693062	-2.19724	0.0280033	0.537701
ENSG00000289367	10.4533	2.61242	1.18824	2.19857	0.0279085	0.537701
ENSG00000174453	1387.21	0.478534	0.217701	2.19813	0.02794	0.537701
ENSG00000205279	563.365	0.619217	0.281783	2.19749	0.0279851	0.537701
ENSG00000228680	62.3414	0.798786	0.363266	2.1989	0.027885	0.537701
ENSG00000171311	3144.22	-0.249724	0.113566	-2.19893	0.0278825	0.537701
ENSG00000165887	8.13113	-6.58382	2.99359	-2.1993	0.0278563	0.537701
ENSG00000259013	4.39197	3.59394	1.63475	2.19847	0.027916	0.537701
ENSG00000279589	36.2106	1.35857	0.618286	2.19732	0.0279975	0.537701
ENSG00000204283	9.09122	4.10496	1.86809	2.19741	0.0279913	0.537701
ENSG00000263146	87.5311	0.867819	0.394916	2.19748	0.0279862	0.537701
ENSG00000125743	22612.3	-0.336002	0.152809	-2.19883	0.0278898	0.537701
ENSG00000117505	9370.3	0.11733	0.0534702	2.19431	0.0282128	0.540239
ENSG00000145687	16349.1	0.204145	0.0930289	2.19442	0.028205	0.540239
ENSG00000138606	615.263	0.524222	0.238892	2.19439	0.0282075	0.540239
ENSG00000266932	5.08367	-5.9037	2.69035	-2.1944	0.0282066	0.540239
ENSG00000005379	119.978	1.21014	0.551591	2.1939	0.0282425	0.540437
ENSG00000203908	15.5271	2.59322	1.18259	2.19284	0.028319	0.54116
ENSG00000156521	310.472	-0.449031	0.20476	-2.19296	0.0283105	0.54116
ENSG00000197982	3322.34	-0.246442	0.112437	-2.19183	0.0283915	0.541805
ENSG00000232756	6.41277	5.06584	2.31118	2.19189	0.0283876	0.541805
ENSG00000235072	13.5734	3.32961	1.52012	2.19036	0.0284978	0.541811
ENSG00000177694	402.245	0.657267	0.299954	2.19123	0.0284355	0.541811
ENSG00000114054	2700.65	-0.378872	0.172897	-2.19132	0.0284286	0.541811
ENSG00000126756	1288.05	-0.256473	0.117128	-2.18969	0.028547	0.541811
ENSG00000225937	163.149	1.15381	0.52688	2.18989	0.028532	0.541811
ENSG00000138326	27678.4	-0.22731	0.103746	-2.19102	0.0284503	0.541811
ENSG00000264966	4.33474	2.45791	1.12195	2.19076	0.0284694	0.541811
ENSG00000141219	2841.03	0.297584	0.135875	2.19013	0.0285148	0.541811
ENSG00000254786	11.2142	-2.03295	0.928843	-2.18869	0.0286195	0.542819
ENSG00000235831	66.2198	0.857487	0.391858	2.18826	0.0286506	0.543039
ENSG00000255621	15.1578	-1.96261	0.897107	-2.18771	0.0286908	0.543434
ENSG00000183186	67.1569	1.13861	0.520545	2.18734	0.0287175	0.543569
ENSG00000114023	7121.2	-0.307395	0.140611	-2.18614	0.0288052	0.544861
ENSG00000248138	3.67991	4.25032	1.94518	2.18505	0.028885	0.546001
ENSG00000231246	7.91332	-6.54423	2.99633	-2.18409	0.0289559	0.546151
ENSG00000168152	2208.12	-0.404062	0.18503	-2.18376	0.0289797	0.546151
ENSG00000170961	7.91461	-6.54432	2.99615	-2.18425	0.028944	0.546151
ENSG00000274605	628.682	-0.348325	0.159463	-2.18437	0.0289354	0.546151
ENSG00000142396	1759.09	-0.234784	0.107521	-2.18361	0.0289907	0.546151
ENSG00000252641	4.91202	3.53709	1.62117	2.18182	0.029123	0.547167
ENSG00000152580	37.3238	3.58949	1.645	2.18206	0.0291054	0.547167
ENSG00000214050	1083.45	-0.342452	0.156936	-2.18211	0.0291015	0.547167
ENSG00000160318	101.651	-0.507763	0.232645	-2.18256	0.0290679	0.547167
ENSG00000198739	2053.97	0.544428	0.249571	2.18145	0.0291501	0.547309
ENSG00000164494	1938.52	-0.334388	0.153348	-2.18058	0.0292143	0.548146
ENSG00000256563	4.83554	5.65498	2.59368	2.18029	0.0292357	0.54818
ENSG00000265712	5.99467	-4.05604	1.86089	-2.17963	0.0292851	0.548737
ENSG00000288737	4.75163	-5.80738	2.66501	-2.17913	0.0293223	0.549066
ENSG00000152990	583.453	0.53692	0.24657	2.17755	0.0294393	0.549416
ENSG00000238457	6.32245	3.14422	1.44385	2.17767	0.0294307	0.549416
ENSG00000287456	4.83632	5.65499	2.59612	2.17825	0.0293874	0.549416
ENSG00000085415	6946.33	-0.215186	0.0987933	-2.17814	0.0293955	0.549416
ENSG00000215397	187.545	0.731579	0.33596	2.17758	0.0294375	0.549416
ENSG00000127366	6.12041	3.69374	1.69655	2.1772	0.0294655	0.549537
ENSG00000171612	533.465	-0.496689	0.22821	-2.17646	0.0295212	0.549866
ENSG00000184599	4.72893	-5.80056	2.66516	-2.17644	0.0295225	0.549866
ENSG00000271851	137.882	-0.806901	0.370922	-2.17539	0.0296009	0.550959
ENSG00000150938	2006.99	0.501608	0.230678	2.17449	0.0296682	0.55176
ENSG00000062096	3059.01	-0.314462	0.144627	-2.17429	0.0296834	0.55176
ENSG00000157554	4.30229	-5.66617	2.60694	-2.17349	0.0297434	0.552508
ENSG00000241490	43.8899	-1.11487	0.513403	-2.17153	0.029891	0.553043
ENSG00000231770	1233.85	-0.298102	0.137251	-2.17195	0.0298597	0.553043
ENSG00000231500	41727.4	-0.249998	0.115113	-2.17176	0.029874	0.553043
ENSG00000286478	5.98215	4.95922	2.2836	2.17167	0.0298808	0.553043
ENSG00000161960	123.742	0.823175	0.378939	2.17232	0.0298318	0.553043
ENSG00000205517	5.02097	5.70876	2.62881	2.17161	0.029885	0.553043
ENSG00000260101	120.695	-1.25725	0.579201	-2.17066	0.0299565	0.553889
ENSG00000114942	19119.7	-0.175767	0.0809921	-2.17017	0.0299938	0.554211
ENSG00000125037	11692.8	-0.273707	0.126144	-2.16981	0.0300215	0.554356
ENSG00000269887	59.5811	1.31133	0.604553	2.1691	0.0300752	0.554615
ENSG00000172375	178.979	-0.920523	0.424368	-2.16916	0.0300704	0.554615
ENSG00000163155	227.666	-0.455048	0.209965	-2.16726	0.0302154	0.554891
ENSG00000158716	908.958	-0.248656	0.114743	-2.16707	0.0302295	0.554891
ENSG00000117118	9167.17	-0.340087	0.157033	-2.1657	0.0303342	0.554891
ENSG00000187626	1131.55	-0.328224	0.151544	-2.16587	0.030321	0.554891
ENSG00000075303	1359.16	-0.296663	0.136941	-2.16636	0.0302838	0.554891
ENSG00000120963	13259.5	-0.152172	0.0701934	-2.1679	0.0301664	0.554891
ENSG00000107937	7765.49	-0.224358	0.103586	-2.16591	0.0303179	0.554891
ENSG00000265917	115.737	0.435675	0.201014	2.16738	0.0302056	0.554891
ENSG00000100568	6690.74	-0.169946	0.078452	-2.16624	0.0302927	0.554891
ENSG00000256061	62.9705	-0.789868	0.364683	-2.1659	0.0303185	0.554891
ENSG00000140374	13006.4	-0.279309	0.12898	-2.16551	0.0303484	0.554891
ENSG00000261141	19.2991	1.62776	0.751519	2.16596	0.0303143	0.554891
ENSG00000275874	4.51849	-5.73346	2.64463	-2.16797	0.0301612	0.554891
ENSG00000264343	10.4432	2.18452	1.00893	2.16519	0.0303732	0.554982
ENSG00000272525	252.312	0.499179	0.23072	2.16357	0.0304971	0.555625
ENSG00000236281	5.8184	-1.51295	0.699262	-2.16364	0.0304921	0.555625
ENSG00000128731	1283.53	0.619617	0.286373	2.16367	0.0304894	0.555625
ENSG00000267222	34.2295	1.17706	0.543848	2.16431	0.0304406	0.555625
ENSG00000228253	6051.71	-0.418589	0.193484	-2.16343	0.0305079	0.555625
ENSG00000118432	11870.1	0.219185	0.101338	2.1629	0.0305487	0.556006
ENSG00000154237	31.6979	1.67546	0.774991	2.16191	0.0306251	0.557034
ENSG00000096654	1818.08	-0.27245	0.126081	-2.16091	0.030702	0.557385
ENSG00000148175	953.786	-0.465849	0.215582	-2.16088	0.0307043	0.557385
ENSG00000234498	25.3375	-0.703477	0.325506	-2.16118	0.0306814	0.557385
ENSG00000279432	37.1739	1.63898	0.758584	2.16057	0.0307285	0.557463
ENSG00000101844	6210.82	-0.362014	0.167593	-2.16007	0.030767	0.55779
ENSG00000253633	6.5107	-2.9976	1.38789	-2.15982	0.0307865	0.55779
ENSG00000137460	171.097	0.778911	0.360714	2.15936	0.030822	0.558073
ENSG00000164919	41847.5	-0.302916	0.140326	-2.15866	0.0308766	0.558394
ENSG00000185924	75.0904	-0.798656	0.369985	-2.15862	0.0308798	0.558394
ENSG00000234715	5.35252	5.80229	2.68882	2.15793	0.0309329	0.558993
ENSG00000148516	13644.9	-0.374127	0.173437	-2.15713	0.0309956	0.559765
ENSG00000145996	2097.48	-0.251325	0.116541	-2.15654	0.0310419	0.560238
ENSG00000164924	144840	-0.107302	0.0497671	-2.15609	0.0310763	0.560314
ENSG00000091879	1025.07	-0.489041	0.226859	-2.15571	0.0311063	0.560314
ENSG00000166562	21726.1	-0.204836	0.0950184	-2.15575	0.0311034	0.560314
ENSG00000183617	1472.25	-0.238624	0.110719	-2.15523	0.0311438	0.560629
ENSG00000287467	23.3802	-1.51547	0.703558	-2.15401	0.0312393	0.561985
ENSG00000196981	1695.99	-0.330493	0.153572	-2.15204	0.031394	0.563813
ENSG00000147905	3022.52	-0.272083	0.126436	-2.15195	0.0314014	0.563813
ENSG00000170296	1723.62	-0.286048	0.132918	-2.15207	0.0313919	0.563813
ENSG00000225303	92.2414	1.2875	0.598531	2.15111	0.0314678	0.564642
ENSG00000188419	10149.6	-0.24867	0.11563	-2.15057	0.0315102	0.564678
ENSG00000172172	8859.61	-0.338848	0.157544	-2.15081	0.0314913	0.564678
ENSG00000249534	7.49753	-6.46409	3.00726	-2.14949	0.0315952	0.564752
ENSG00000113140	1258.76	0.763404	0.355154	2.1495	0.0315949	0.564752
ENSG00000008311	4457.34	0.459347	0.213684	2.14965	0.0315827	0.564752
ENSG00000287853	45.0727	1.87358	0.87141	2.15006	0.0315506	0.564752
ENSG00000225591	17.2706	2.33761	1.08811	2.14833	0.0316875	0.565439
ENSG00000224550	102.602	-0.523913	0.244024	-2.14697	0.0317956	0.565439
ENSG00000226779	557.538	0.665879	0.310092	2.14736	0.0317647	0.565439
ENSG00000286062	7.45341	-6.45661	3.00728	-2.14699	0.0317938	0.565439
ENSG00000256188	13.7928	-3.42881	1.59659	-2.14758	0.0317471	0.565439
ENSG00000196421	15.369	2.75589	1.28258	2.14871	0.0316577	0.565439
ENSG00000213790	52.8447	0.938609	0.437141	2.14715	0.0317811	0.565439
ENSG00000203280	321.551	-0.545227	0.253864	-2.14771	0.0317364	0.565439
ENSG00000183960	950.599	0.54537	0.254085	2.14641	0.0318407	0.565881
ENSG00000278845	7309.32	-0.269857	0.125752	-2.14595	0.031877	0.566167
ENSG00000236719	5.0269	5.71229	2.66345	2.1447	0.031977	0.567402
ENSG00000168016	58.0903	-2.77587	1.29437	-2.14457	0.0319872	0.567402
ENSG00000134668	11.8267	-2.80717	1.31028	-2.14243	0.0321593	0.567614
ENSG00000001561	3132.78	-0.352435	0.164505	-2.1424	0.0321617	0.567614
ENSG00000164695	50.5631	-1.37947	0.64348	-2.14376	0.0320524	0.567614
ENSG00000251783	35.2292	0.871027	0.406407	2.14324	0.0320937	0.567614
ENSG00000107581	16123	-0.266799	0.124505	-2.14288	0.032123	0.567614
ENSG00000141298	2141.15	0.300966	0.14038	2.14395	0.0320373	0.567614
[truncated: 39,933 more rows]

## Sheet: Table S7
Table S7 | RNAseq DEG analysis of D28 BRD1 vs WT iGLUTs
[truncated: 40,436 more rows]

[truncated: 1 more sheets: Table S8]
